# Supplementary material for: β-Sultams exhibit discrete binding preferences for diverse bacterial enzymes with nucleophilic residues
Source: Royal Society of Chemistry journal article supplement (doi:10.1039/c3cc46002a), 2013-10-30
Supplement: c3cc46002a.xlsx [file c3cc46002a.xlsx]

## Sheet: BT_S07_AHC
		Area			DMSO			S07_1st lane			S07_2nd lane			General information
Accession	Description	DMSO	S07_1st lane	S07_2nd lane	Score A2	# Peptides A2	# PSM A2	Score B2	# Peptides B2	# PSM B2	Score C2	# Peptides C2	# PSM C2	# AAs	MW [kDa]	ΣCoverage
Q2STE9	ATP synthase subunit beta 1 OS=Burkholderia thailandensis (strain E264 / ATCC 700388 / DSM 13276 / CIP 106301) GN=atpD1 - [ATPB1_BURTA]	3.29472e+07	1.74003e+08	1.08417e+08	28.3588	6	8	91.567	13	30	69.4345	14	23	464	50.5911	49.78
Q2STE7	ATP synthase subunit alpha 1 OS=Burkholderia thailandensis (strain E264 / ATCC 700388 / DSM 13276 / CIP 106301) GN=atpA1 - [ATPA1_BURTA]	3.49878e+08	1.03224e+09	4.19263e+08	104.597	18	36	154.394	22	52	108.168	18	37	513	55.8773	44.64
Q2SWA7	Aldehyde dehydrogenase OS=Burkholderia thailandensis (strain E264 / ATCC 700388 / DSM 13276 / CIP 106301) GN=BTH_I2271 - [Q2SWA7_BURTA]	1.73066e+07	1.3447e+08	1.48954e+08	16.8884	5	6	63.0213	13	21	53.6403	11	17	497	52.6609	44.06
Q2T293	Glutamyl-tRNA(Gln) amidotransferase subunit A OS=Burkholderia thailandensis (strain E264 / ATCC 700388 / DSM 13276 / CIP 106301) GN=gatA - [GATA_BURTA]	3.38628e+07	1.07196e+08	4.25536e+07	41.0945	9	14	55.5648	10	18	31.2112	9	10	496	52.3044	43.55
Q2STU0	Adenosylhomocysteinase OS=Burkholderia thailandensis (strain E264 / ATCC 700388 / DSM 13276 / CIP 106301) GN=ahcY - [SAHH_BURTA]	1.41991e+08	2.56573e+09	2.03477e+09	48.4636	9	16	252.469	17	86	148.42	16	48	473	52.1274	37.84
Q2SYJ5	60 kDa chaperonin 1 OS=Burkholderia thailandensis (strain E264 / ATCC 700388 / DSM 13276 / CIP 106301) GN=groL1 - [CH601_BURTA]	4.70809e+07	8.7416e+07	6.94945e+07	40.8656	11	14	36.0208	10	12	35.1365	10	11	546	57.11	37
Q2T0Z3	Glycerol kinase OS=Burkholderia thailandensis (strain E264 / ATCC 700388 / DSM 13276 / CIP 106301) GN=glpK - [GLPK_BURTA]	1.09589e+07	6.84354e+07	6.4879e+07	7.79339	3	3	45.4688	8	15	36.9689	7	12	500	54.6757	21.6
Q2T5X7	Peptide synthetase, putative OS=Burkholderia thailandensis (strain E264 / ATCC 700388 / DSM 13276 / CIP 106301) GN=BTH_II1226 - [Q2T5X7_BURTA]	1.38391e+07	3.62443e+07	8.57046e+07	13.7087	3	5	26.5334	7	9	24.7468	6	9	548	58.6606	21.17
Q2T1W2	Argininosuccinate synthase OS=Burkholderia thailandensis (strain E264 / ATCC 700388 / DSM 13276 / CIP 106301) GN=argG - [ASSY_BURTA]	0	3.01728e+07	2.15949e+07				15.6899	5	6	12.7536	4	4	446	49.6933	19.06
Q2SWE3	Histidyl-tRNA synthetase OS=Burkholderia thailandensis (strain E264 / ATCC 700388 / DSM 13276 / CIP 106301) GN=hisS - [SYH_BURTA]	0	4.27345e+07	1.97194e+07				31.4529	7	12	11.9232	4	4	446	49.5574	17.71
Q2SUC5	Putative uncharacterized protein OS=Burkholderia thailandensis (strain E264 / ATCC 700388 / DSM 13276 / CIP 106301) GN=BTH_I2967 - [Q2SUC5_BURTA]	1.65446e+07	4.42514e+07	4.19818e+07	11.0278	3	5	13.7654	5	6	10.7068	4	4	448	49.8057	17.41
Q2T433	Levansucrase OS=Burkholderia thailandensis (strain E264 / ATCC 700388 / DSM 13276 / CIP 106301) GN=BTH_II1872 - [Q2T433_BURTA]	0	5.39827e+07	4.2386e+07				14.8503	5	6	11.342	3	4	509	54.7435	15.52
Q2T0Y5	ATP-dependent RNA helicase RhlE OS=Burkholderia thailandensis (strain E264 / ATCC 700388 / DSM 13276 / CIP 106301) GN=BTH_I0607 - [Q2T0Y5_BURTA]	2.2969e+06	3.30399e+07	0				17.6794	5	7				482	51.6963	15.15
Q2T0Z2	Glycerol-3-phosphate dehydrogenase OS=Burkholderia thailandensis (strain E264 / ATCC 700388 / DSM 13276 / CIP 106301) GN=BTH_I0600 - [Q2T0Z2_BURTA]	1.66054e+07	3.21788e+07	1.27196e+07	13.3526	4	5	15.5158	4	6	6.54087	2	2	510	56.0921	13.53
Q2T0S9	Pyruvate kinase OS=Burkholderia thailandensis (strain E264 / ATCC 700388 / DSM 13276 / CIP 106301) GN=pyk-1 - [Q2T0S9_BURTA]	2.88479e+07	7.51854e+06	0	11.4332	4	4	10.9466	4	4				564	60.5817	13.3
Q2SYA3	Glucose-6-phosphate 1-dehydrogenase OS=Burkholderia thailandensis (strain E264 / ATCC 700388 / DSM 13276 / CIP 106301) GN=zwf - [Q2SYA3_BURTA]	0	6.2615e+07	2.4544e+07				18.9735	5	7				489	54.5233	12.88
Q2T4X6	Microbial collagenase, putative OS=Burkholderia thailandensis (strain E264 / ATCC 700388 / DSM 13276 / CIP 106301) GN=BTH_II1578 - [Q2T4X6_BURTA]	0	3.12106e+07	3.47717e+07				19.2676	4	6	23.0306	5	7	602	67.6263	12.29
Q2T0C0	Probable cytosol aminopeptidase OS=Burkholderia thailandensis (strain E264 / ATCC 700388 / DSM 13276 / CIP 106301) GN=pepA - [AMPA_BURTA]	3.41277e+07	1.62969e+07	0	12.826	5	5	10.5718	3	4				503	52.6975	11.93
Q2SY90	Seryl-tRNA synthetase OS=Burkholderia thailandensis (strain E264 / ATCC 700388 / DSM 13276 / CIP 106301) GN=serS - [SYS_BURTA]	0	2.06095e+07	3.20396e+07				14.131	4	5				433	47.496	11.55
Q2T3H0	Adenosylmethionine-8-amino-7-oxononanoate aminotransferase, putative OS=Burkholderia thailandensis (strain E264 / ATCC 700388 / DSM 13276 / CIP 106301) GN=BTH_II2091 - [Q2T3H0_BURTA]	1.74124e+07	7.6069e+07	4.18593e+07				16.6179	4	6	12.1811	3	4	473	51.4168	10.99
Q2SZ81	Adenylosuccinate lyase OS=Burkholderia thailandensis (strain E264 / ATCC 700388 / DSM 13276 / CIP 106301) GN=purB - [Q2SZ81_BURTA]	0	1.02285e+07	0				10.9321	3	3				483	54.06	10.35
Q2T6C9	Betaine aldehyde dehydrogenase OS=Burkholderia thailandensis (strain E264 / ATCC 700388 / DSM 13276 / CIP 106301) GN=betB - [Q2T6C9_BURTA]	0	4.23133e+07	2.23768e+07				10.2242	3	3				492	52.5168	9.96
Q2T292	Aspartyl/glutamyl-tRNA(Asn/Gln) amidotransferase subunit B OS=Burkholderia thailandensis (strain E264 / ATCC 700388 / DSM 13276 / CIP 106301) GN=gatB - [GATB_BURTA]	0	1.53818e+07	1.16886e+07				7.50949	3	3	4.87715	2	2	490	53.2283	9.59
Q2SXQ0	Radical SAM domain protein OS=Burkholderia thailandensis (strain E264 / ATCC 700388 / DSM 13276 / CIP 106301) GN=BTH_I1767 - [Q2SXQ0_BURTA]	1.84823e+07	1.11379e+07	0	8.28169	2	2	5.61527	2	2				503	57.5904	8.95
Q2SUA0	UDP-N-acetylglucosamine 1-carboxyvinyltransferase OS=Burkholderia thailandensis (strain E264 / ATCC 700388 / DSM 13276 / CIP 106301) GN=murA - [Q2SUA0_BURTA]	0	7.18014e+06	1.77085e+07							7.46808	3	3	449	47.3208	8.46
Q2T4E6	Peptidase, M20/M25/M40 family OS=Burkholderia thailandensis (strain E264 / ATCC 700388 / DSM 13276 / CIP 106301) GN=BTH_II1759 - [Q2T4E6_BURTA]	0	9.63993e+06	0				5.79662	2	2				479	51.3493	7.1
Q2SUC9	Putative uncharacterized protein OS=Burkholderia thailandensis (strain E264 / ATCC 700388 / DSM 13276 / CIP 106301) GN=BTH_I2963 - [Q2SUC9_BURTA]	0	3.42246e+07	1.89341e+07				4.34453	2	2	5.01012	2	2	496	54.7607	6.45
Q2SYZ4	Chaperone protein dnaK OS=Burkholderia thailandensis (strain E264 / ATCC 700388 / DSM 13276 / CIP 106301) GN=dnaK - [DNAK_BURTA]	1.11825e+07	8.95897e+06	5.87302e+06	6.42858	2	2	8.56026	3	3				650	69.7052	6.31
Q2T3E1	Succinate-semialdehyde dehydrogenase OS=Burkholderia thailandensis (strain E264 / ATCC 700388 / DSM 13276 / CIP 106301) GN=BTH_II2120 - [Q2T3E1_BURTA]	1.42674e+07	0	1.86148e+07	9.19085	2	3							489	51.6558	5.93
Q2T0R8	Serine protease OS=Burkholderia thailandensis (strain E264 / ATCC 700388 / DSM 13276 / CIP 106301) GN=BTH_I0675 - [Q2T0R8_BURTA]	0	1.3304e+07	0				4.86988	2	2				495	51.38	5.25
Q2T6Q2	Biotin carboxylase OS=Burkholderia thailandensis (strain E264 / ATCC 700388 / DSM 13276 / CIP 106301) GN=BTH_II0950 - [Q2T6Q2_BURTA]	4.47915e+06	0	0	7.13019	3	3							666	70.582	4.95
Q2SWN8	UPF0061 protein BTH_I2140 OS=Burkholderia thailandensis (strain E264 / ATCC 700388 / DSM 13276 / CIP 106301) GN=BTH_I2140 - [Y2140_BURTA]	0	1.65226e+06	0				5.24723	2	2				521	57.5608	4.61
Q2STC4	Methylmalonate-semialdehyde dehydrogenase OS=Burkholderia thailandensis (strain E264 / ATCC 700388 / DSM 13276 / CIP 106301) GN=mmsA-1 - [Q2STC4_BURTA]	3.74782e+06	1.01777e+07	1.85441e+07				5.07895	2	2				508	54.1056	4.53
Q2SX78	Cysteinyl-tRNA synthetase OS=Burkholderia thailandensis (strain E264 / ATCC 700388 / DSM 13276 / CIP 106301) GN=cysS - [SYC_BURTA]	0	2.45838e+07	1.8912e+06				5.16889	2	2				465	52.2624	4.52
Q2T5W7	Nonribosomal peptide synthetase, putative OS=Burkholderia thailandensis (strain E264 / ATCC 700388 / DSM 13276 / CIP 106301) GN=BTH_II1236 - [Q2T5W7_BURTA]	5.24651e+06	2.52352e+07	1.09683e+07				8.21711	3	3				1144	123.461	2.8

## Sheet: BT_S07_DsbA
		Area			DMSO			S07_1st lane			S07_2nd lane			General information
Accession	Description	DMSO	S07_1st lane	S07_2nd lane	Score A2	# Peptides A2	# PSM A2	Score B2	# Peptides B2	# PSM B2	Score C2	# Peptides C2	# PSM C2	# AAs	MW [kDa]	ΣCoverage
Q2T1N8	Thiol:disulfide interchange protein DsbA OS=Burkholderia thailandensis (strain E264 / ATCC 700388 / DSM 13276 / CIP 106301) GN=BTH_I0353 - [Q2T1N8_BURTA]	0	3.26064e+08	3.01333e+08				46.6774	5	13	48.8368	8	13	212	23.3573	45.75
Q2SZ29	YceI-like family protein OS=Burkholderia thailandensis (strain E264 / ATCC 700388 / DSM 13276 / CIP 106301) GN=BTH_I1273 - [Q2SZ29_BURTA]	0	1.7986e+08	7.26997e+07				49.5429	5	15	25.4308	6	9	187	20.1491	41.18
Q2SZN3	NADH-quinone oxidoreductase subunit C OS=Burkholderia thailandensis (strain E264 / ATCC 700388 / DSM 13276 / CIP 106301) GN=nuoC - [NUOC_BURTA]	7.44258e+06	2.69171e+07	2.97827e+07	4.62289	2	2	4.85061	2	2				200	22.7757	16.5
Q2SWM0	Ankyrin repeat protein OS=Burkholderia thailandensis (strain E264 / ATCC 700388 / DSM 13276 / CIP 106301) GN=BTH_I2158 - [Q2SWM0_BURTA]	0	4.63615e+07	4.27671e+07				9.13551	2	3				240	24.8122	13.33
Q2SZK9	Glutathione S-transferase N-terminal domain protein OS=Burkholderia thailandensis (strain E264 / ATCC 700388 / DSM 13276 / CIP 106301) GN=BTH_I1087 - [Q2SZK9_BURTA]	1.66172e+07	2.9154e+07	5.22126e+07	4.09679	2	2	9.75816	3	4				218	24.3917	13.3
Q2SYB4	Riboflavin synthase, alpha subunit OS=Burkholderia thailandensis (strain E264 / ATCC 700388 / DSM 13276 / CIP 106301) GN=ribE - [Q2SYB4_BURTA]	5.6477e+06	8.17301e+06	7.24918e+06				7.895	2	3				209	22.0765	12.92
Q2SUF2	Transcriptional regulator, TetR family OS=Burkholderia thailandensis (strain E264 / ATCC 700388 / DSM 13276 / CIP 106301) GN=BTH_I2940 - [Q2SUF2_BURTA]	0	6.53971e+06	0				5.20313	2	2				215	22.8658	10.23
Q2SZH3	Arginine biosynthesis bifunctional protein ArgJ OS=Burkholderia thailandensis (strain E264 / ATCC 700388 / DSM 13276 / CIP 106301) GN=argJ - [Q2SZH3_BURTA]	5.93682e+06	8.4619e+06	8.09763e+06	6.9424	3	3	4.98483	2	2				424	44.2018	9.67

## Sheet: BT_S07_DsbC
		Area			DMSO			S07_1st lane			S07_2nd lane			General information
Accession	Description	DMSO	S07_1st lane	S07_2nd lane	Score A2	# Peptides A2	# PSM A2	Score B2	# Peptides B2	# PSM B2	Score C2	# Peptides C2	# PSM C2	# AAs	MW [kDa]	ΣCoverage
Q2SU28	50S ribosomal protein L4 OS=Burkholderia thailandensis (strain E264 / ATCC 700388 / DSM 13276 / CIP 106301) GN=rplD - [RL4_BURTA]	3.23567e+07	2.64273e+08	1.64345e+08	22.1409	5	8	53.585	8	17	62.1127	10	21	206	22.8521	62.14
Q2SWM0	Ankyrin repeat protein OS=Burkholderia thailandensis (strain E264 / ATCC 700388 / DSM 13276 / CIP 106301) GN=BTH_I2158 - [Q2SWM0_BURTA]	0	1.94254e+08	3.04159e+08				82.2488	12	23	106.583	12	29	240	24.8122	61.67
Q2SXU5	3-oxoacyl-(Acyl-carrier-protein) reductase OS=Burkholderia thailandensis (strain E264 / ATCC 700388 / DSM 13276 / CIP 106301) GN=fabG - [Q2SXU5_BURTA]	3.05092e+07	1.2274e+08	6.70047e+07	13.3801	2	3	33.6504	5	10	32.3648	6	10	249	25.7134	42.17
Q2SU52	30S ribosomal protein S4 OS=Burkholderia thailandensis (strain E264 / ATCC 700388 / DSM 13276 / CIP 106301) GN=rpsD - [RS4_BURTA]	8.52384e+06	5.46273e+07	3.69548e+07				25.9983	7	10	26.6443	7	10	207	23.1674	41.55
Q2SUC1	Stringent starvation protein A OS=Burkholderia thailandensis (strain E264 / ATCC 700388 / DSM 13276 / CIP 106301) GN=BTH_I2974 - [Q2SUC1_BURTA]	8.03981e+06	1.0799e+08	8.89472e+07				33.7883	6	12	28.9659	6	11	203	23.6653	39.41
Q2T1N8	Thiol:disulfide interchange protein DsbA OS=Burkholderia thailandensis (strain E264 / ATCC 700388 / DSM 13276 / CIP 106301) GN=BTH_I0353 - [Q2T1N8_BURTA]	0	1.69589e+08	1.71714e+08				20.5464	4	6	37.4395	6	11	212	23.3573	38.68
Q2SUF2	Transcriptional regulator, TetR family OS=Burkholderia thailandensis (strain E264 / ATCC 700388 / DSM 13276 / CIP 106301) GN=BTH_I2940 - [Q2SUF2_BURTA]	0	1.44944e+07	1.83274e+07				10.3251	4	4	23.5812	6	8	215	22.8658	33.02
Q2SZ47	Glutathione S-transferase OS=Burkholderia thailandensis (strain E264 / ATCC 700388 / DSM 13276 / CIP 106301) GN=BTH_I1255 - [Q2SZ47_BURTA]	8.35577e+06	3.75239e+07	1.51706e+07				11.4447	3	4	10.488	3	3	203	22.8398	28.08
Q2SUH5	Thiol:disulfide interchange protein DsbC, putative OS=Burkholderia thailandensis (strain E264 / ATCC 700388 / DSM 13276 / CIP 106301) GN=BTH_I2917 - [Q2SUH5_BURTA]	9.07533e+06	1.04903e+07	1.03796e+07				11.5024	3	3	13.5975	4	4	242	25.6424	26.03
Q2SZ29	YceI-like family protein OS=Burkholderia thailandensis (strain E264 / ATCC 700388 / DSM 13276 / CIP 106301) GN=BTH_I1273 - [Q2SZ29_BURTA]	0	1.77343e+07	9.39773e+06				11.2724	3	4	6.41944	2	2	187	20.1491	20.86
Q2SWC1	Acetoacetyl-CoA reductase OS=Burkholderia thailandensis (strain E264 / ATCC 700388 / DSM 13276 / CIP 106301) GN=BTH_I2257 - [Q2SWC1_BURTA]	0	8.76811e+06	7.84373e+06				8.25891	2	2	8.99996	3	3	260	27.9311	18.08
Q2SUC7	Lipoprotein, putative OS=Burkholderia thailandensis (strain E264 / ATCC 700388 / DSM 13276 / CIP 106301) GN=BTH_I2965 - [Q2SUC7_BURTA]	0	0	8.19487e+06							9.23852	3	4	229	23.8875	17.47
Q2SU25	Elongation factor Tu OS=Burkholderia thailandensis (strain E264 / ATCC 700388 / DSM 13276 / CIP 106301) GN=tuf1 - [EFTU_BURTA]	0	3.93056e+06	1.72743e+07				6.61467	2	2	14.8288	4	5	396	42.9641	15.91
Q2SYY9	2-amino-4-hydroxy-6-hydroxymethyldihydropteridine pyrophosphokinase OS=Burkholderia thailandensis (strain E264 / ATCC 700388 / DSM 13276 / CIP 106301) GN=BTH_I1313 - [Q2SYY9_BURTA]	0	0	2.01275e+06							5.95462	2	2	175	19.132	15.43
Q2SXZ1	Molybdopterin biosynthesis mog protein OS=Burkholderia thailandensis (strain E264 / ATCC 700388 / DSM 13276 / CIP 106301) GN=BTH_I1671 - [Q2SXZ1_BURTA]	0	9.0878e+06	1.09386e+07				5.98771	2	2				206	21.7764	14.56
Q2STU5	Carboxymethylenebutenolidase OS=Burkholderia thailandensis (strain E264 / ATCC 700388 / DSM 13276 / CIP 106301) GN=BTH_I3160 - [Q2STU5_BURTA]	0	1.79132e+06	3.41281e+06							6.43772	2	2	230	24.5786	13.04
Q2T5X6	N-acyl homoserine lactone synthase OS=Burkholderia thailandensis (strain E264 / ATCC 700388 / DSM 13276 / CIP 106301) GN=BTH_II1227 - [Q2T5X6_BURTA]	0	1.1926e+07	1.37929e+07				10.1346	2	4	9.05244	2	3	206	22.2518	12.62
Q2STP9	Curli production assembly/transport component CsgG, putative OS=Burkholderia thailandensis (strain E264 / ATCC 700388 / DSM 13276 / CIP 106301) GN=BTH_I3206 - [Q2STP9_BURTA]	0	0	1.26172e+07							11.7345	2	4	207	21.9193	12.56
Q2SZH3	Arginine biosynthesis bifunctional protein ArgJ OS=Burkholderia thailandensis (strain E264 / ATCC 700388 / DSM 13276 / CIP 106301) GN=argJ - [Q2SZH3_BURTA]	0	1.36345e+07	5.75629e+06				13.9513	4	5	8.10025	2	3	424	44.2018	12.26
Q2SUA6	Imidazole glycerol phosphate synthase, glutamine amidotransferase subunit OS=Burkholderia thailandensis (strain E264 / ATCC 700388 / DSM 13276 / CIP 106301) GN=hisH - [Q2SUA6_BURTA]	0	11813663	7.43103e+06							7.70433	2	3	213	23.4637	9.39
Q2STB3	Transcriptional regulator, MarR family OS=Burkholderia thailandensis (strain E264 / ATCC 700388 / DSM 13276 / CIP 106301) GN=BTH_I3344 - [Q2STB3_BURTA]	7.22391e+06	1.84104e+07	2.4823e+07				7.815	2	3	7.92519	2	3	270	29.3682	9.26
Q2SZK9	Glutathione S-transferase N-terminal domain protein OS=Burkholderia thailandensis (strain E264 / ATCC 700388 / DSM 13276 / CIP 106301) GN=BTH_I1087 - [Q2SZK9_BURTA]	0	2.25013e+07	1.59936e+07							4.54772	2	2	218	24.3917	9.17
Q2SZP8	Ketol-acid reductoisomerase OS=Burkholderia thailandensis (strain E264 / ATCC 700388 / DSM 13276 / CIP 106301) GN=ilvC - [ILVC_BURTA]	0	866430	938363				7.26504	2	3				338	36.2745	4.14

## Sheet: BT_S07_FMND-B
		Area			DMSO			S07_1st lane			S07_2nd lane			General information
Accession	Description	DMSO	S07_1st lane	S07_2nd lane	Score A2	# Peptides A2	# PSM A2	Score B2	# Peptides B2	# PSM B2	Score C2	# Peptides C2	# PSM C2	# AAs	MW [kDa]	ΣCoverage
Q2SZ84	4-hydroxy-2-oxoglutarate aldolase/2-deydro-3-deoxyphosphogluconate aldolase OS=Burkholderia thailandensis (strain E264 / ATCC 700388 / DSM 13276 / CIP 106301) GN=BTH_I1218 - [Q2SZ84_BURTA]	6.65829e+07	6.6397e+07	8.27944e+07	37.5942	6	11	51.499	8	16	41.3093	6	12	208	21.4875	57.69
Q2SZ29	YceI-like family protein OS=Burkholderia thailandensis (strain E264 / ATCC 700388 / DSM 13276 / CIP 106301) GN=BTH_I1273 - [Q2SZ29_BURTA]	0	2.38894e+09	1.8843e+09				131.492	9	44	163.938	9	55	187	20.1491	56.15
Q2SU39	50S ribosomal protein L5 OS=Burkholderia thailandensis (strain E264 / ATCC 700388 / DSM 13276 / CIP 106301) GN=rplE - [RL5_BURTA]	0	4.22526e+07	1.22533e+08				14.6979	5	6	23.5072	6	9	179	20.0008	36.31
Q2T1N8	Thiol:disulfide interchange protein DsbA OS=Burkholderia thailandensis (strain E264 / ATCC 700388 / DSM 13276 / CIP 106301) GN=BTH_I0353 - [Q2T1N8_BURTA]	1.1812e+07	2.52707e+07	5.47438e+07	7.293	2	2	12.3946	4	4	11.5823	3	4	212	23.3573	25
Q2SZD9	Acetyl-CoA carboxylase, biotin carboxyl carrier protein OS=Burkholderia thailandensis (strain E264 / ATCC 700388 / DSM 13276 / CIP 106301) GN=accB - [Q2SZD9_BURTA]	5.05759e+08	3.66952e+08	4.21851e+08	23.2664	2	7	23.374	2	6	18.9202	2	5	157	16.1645	24.84
Q2SZ09	ATP:cob(I)alamin adenosyltransferase, putative OS=Burkholderia thailandensis (strain E264 / ATCC 700388 / DSM 13276 / CIP 106301) GN=BTH_I1293 - [Q2SZ09_BURTA]	0	1.74491e+07	2.0826e+07				6.06949	2	2				183	19.4832	14.75
Q2T2B2	Peptide deformylase OS=Burkholderia thailandensis (strain E264 / ATCC 700388 / DSM 13276 / CIP 106301) GN=def-1 - [Q2T2B2_BURTA]	0	7.43057e+06	2.00283e+07				4.82462	2	2	5.7622	2	2	179	20.4586	13.41
Q2SZQ9	Putative uncharacterized protein OS=Burkholderia thailandensis (strain E264 / ATCC 700388 / DSM 13276 / CIP 106301) GN=BTH_I1036 - [Q2SZQ9_BURTA]	1.20497e+07	1.04404e+07	8.89451e+06				6.09774	2	2				195	21.3167	13.33
Q2SUH7	FMN-dependent NADH-azoreductase OS=Burkholderia thailandensis (strain E264 / ATCC 700388 / DSM 13276 / CIP 106301) GN=azoR - [AZOR_BURTA]	0	5.16953e+07	9.34713e+07				12.1379	2	4	16.1364	2	5	198	20.8278	12.63
Q2SXV5	Haloacid dehalogenase-like hydrolase OS=Burkholderia thailandensis (strain E264 / ATCC 700388 / DSM 13276 / CIP 106301) GN=BTH_I1709 - [Q2SXV5_BURTA]	1.42408e+06	9.2119e+06	1.24724e+07							5.43318	2	2	222	24.0461	11.71

## Sheet: BT_S12_AHC
		Area			DMSO			S12_1st lane			S12_2nd lane			General information
Accession	Description	DMSO	S12_1st lane	S12_2nd lane	Score A2	# Peptides A2	# PSM A2	Score B2	# Peptides B2	# PSM B2	Score C2	# Peptides C2	# PSM C2	# AAs	MW [kDa]	ΣCoverage
Q2STE9	ATP synthase subunit beta 1 OS=Burkholderia thailandensis (strain E264 / ATCC 700388 / DSM 13276 / CIP 106301) GN=atpD1 - [ATPB1_BURTA]	3.29472e+07	8.58399e+07	5.24667e+07	28.3588	6	8	79.842	12	24	59.4615	11	19	464	50.5911	46.77
Q2STE7	ATP synthase subunit alpha 1 OS=Burkholderia thailandensis (strain E264 / ATCC 700388 / DSM 13276 / CIP 106301) GN=atpA1 - [ATPA1_BURTA]	3.49878e+08	1.77016e+08	4.0575e+08	104.597	18	36	85.4448	13	27	109.7	15	36	513	55.8773	37.43
Q2STU0	Adenosylhomocysteinase OS=Burkholderia thailandensis (strain E264 / ATCC 700388 / DSM 13276 / CIP 106301) GN=ahcY - [SAHH_BURTA]	1.41991e+08	1.7189e+09	2.56125e+09	48.4636	9	16	244.666	18	72	235.753	18	73	473	52.1274	35.73
Q2T293	Glutamyl-tRNA(Gln) amidotransferase subunit A OS=Burkholderia thailandensis (strain E264 / ATCC 700388 / DSM 13276 / CIP 106301) GN=gatA - [GATA_BURTA]	3.38628e+07	1.47759e+07	4.24664e+07	41.0945	9	14	38.5512	11	12	29.9357	8	10	496	52.3044	35.28
Q2SYJ5	60 kDa chaperonin 1 OS=Burkholderia thailandensis (strain E264 / ATCC 700388 / DSM 13276 / CIP 106301) GN=groL1 - [CH601_BURTA]	4.70809e+07	2.46401e+07	1.78056e+07	40.8656	11	14	18.7023	6	6	39.9933	10	14	546	57.11	34.8
Q2SWA7	Aldehyde dehydrogenase OS=Burkholderia thailandensis (strain E264 / ATCC 700388 / DSM 13276 / CIP 106301) GN=BTH_I2271 - [Q2SWA7_BURTA]	1.73066e+07	1.35374e+07	1.69657e+07	16.8884	5	6	15.4887	4	5	8.85122	3	3	497	52.6609	23.94
Q2T5X7	Peptide synthetase, putative OS=Burkholderia thailandensis (strain E264 / ATCC 700388 / DSM 13276 / CIP 106301) GN=BTH_II1226 - [Q2T5X7_BURTA]	1.38391e+07	1.69834e+07	2.42949e+07	13.7087	3	5	17.2835	6	6	16.3167	5	5	548	58.6606	15.51
Q2T0S9	Pyruvate kinase OS=Burkholderia thailandensis (strain E264 / ATCC 700388 / DSM 13276 / CIP 106301) GN=pyk-1 - [Q2T0S9_BURTA]	2.88479e+07	3.92715e+06	0	11.4332	4	4	6.17067	2	2				564	60.5817	14.72
Q2T0C0	Probable cytosol aminopeptidase OS=Burkholderia thailandensis (strain E264 / ATCC 700388 / DSM 13276 / CIP 106301) GN=pepA - [AMPA_BURTA]	3.41277e+07	6.34886e+06	0	12.826	5	5	7.72016	2	3				503	52.6975	11.73
Q2T0Z2	Glycerol-3-phosphate dehydrogenase OS=Burkholderia thailandensis (strain E264 / ATCC 700388 / DSM 13276 / CIP 106301) GN=BTH_I0600 - [Q2T0Z2_BURTA]	1.66054e+07	9.51194e+06	3.2016e+07	13.3526	4	5	6.47618	2	3				510	56.0921	11.37
Q2SUC5	Putative uncharacterized protein OS=Burkholderia thailandensis (strain E264 / ATCC 700388 / DSM 13276 / CIP 106301) GN=BTH_I2967 - [Q2SUC5_BURTA]	1.65446e+07	9.88965e+06	1.19964e+07	11.0278	3	5	7.11649	2	3	10.6893	3	4	448	49.8057	10.94
Q2T0Z3	Glycerol kinase OS=Burkholderia thailandensis (strain E264 / ATCC 700388 / DSM 13276 / CIP 106301) GN=glpK - [GLPK_BURTA]	1.09589e+07	2.91966e+06	2.89541e+06	7.79339	3	3	6.72754	2	2				500	54.6757	9.6
Q2T3H0	Adenosylmethionine-8-amino-7-oxononanoate aminotransferase, putative OS=Burkholderia thailandensis (strain E264 / ATCC 700388 / DSM 13276 / CIP 106301) GN=BTH_II2091 - [Q2T3H0_BURTA]	1.74124e+07	5.12232e+06	3.94988e+06				9.95782	3	3	8.4949	2	3	473	51.4168	9.09
Q2SXQ0	Radical SAM domain protein OS=Burkholderia thailandensis (strain E264 / ATCC 700388 / DSM 13276 / CIP 106301) GN=BTH_I1767 - [Q2SXQ0_BURTA]	1.84823e+07	3.09431e+06	0	8.28169	2	2							503	57.5904	6.96
Q2T3E1	Succinate-semialdehyde dehydrogenase OS=Burkholderia thailandensis (strain E264 / ATCC 700388 / DSM 13276 / CIP 106301) GN=BTH_II2120 - [Q2T3E1_BURTA]	1.42674e+07	3.22927e+06	7124535	9.19085	2	3							489	51.6558	5.93
Q2T433	Levansucrase OS=Burkholderia thailandensis (strain E264 / ATCC 700388 / DSM 13276 / CIP 106301) GN=BTH_II1872 - [Q2T433_BURTA]	0	3.66532e+06	2.64499e+07							5.35991	2	2	509	54.7435	5.5
Q2T6Q2	Biotin carboxylase OS=Burkholderia thailandensis (strain E264 / ATCC 700388 / DSM 13276 / CIP 106301) GN=BTH_II0950 - [Q2T6Q2_BURTA]	4.47915e+06	0	0	7.13019	3	3							666	70.582	4.95
Q2SYZ4	Chaperone protein dnaK OS=Burkholderia thailandensis (strain E264 / ATCC 700388 / DSM 13276 / CIP 106301) GN=dnaK - [DNAK_BURTA]	1.11825e+07	0	0	6.42858	2	2							650	69.7052	4.77
Q2T0Y5	ATP-dependent RNA helicase RhlE OS=Burkholderia thailandensis (strain E264 / ATCC 700388 / DSM 13276 / CIP 106301) GN=BTH_I0607 - [Q2T0Y5_BURTA]	2.2969e+06	4.711e+06	1.79877e+07				5.7391	2	2				482	51.6963	4.56

## Sheet: BT_S12_DsbA
		Area			DMSO			S12_1st lane			S12_2nd lane			General information
Accession	Description	DMSO	S12_1st lane	S12_2nd lane	Score A2	# Peptides A2	# PSM A2	Score B2	# Peptides B2	# PSM B2	Score C2	# Peptides C2	# PSM C2	# AAs	MW [kDa]	ΣCoverage
Q2T1N8	Thiol:disulfide interchange protein DsbA OS=Burkholderia thailandensis (strain E264 / ATCC 700388 / DSM 13276 / CIP 106301) GN=BTH_I0353 - [Q2T1N8_BURTA]	0	7.36085e+08	5.14217e+08				82.4653	11	23	56.6531	9	16	212	23.3573	53.3
Q2SWM0	Ankyrin repeat protein OS=Burkholderia thailandensis (strain E264 / ATCC 700388 / DSM 13276 / CIP 106301) GN=BTH_I2158 - [Q2SWM0_BURTA]	0	5.59504e+07	9.6858e+07				33.8082	7	9	41.5999	7	12	240	24.8122	48.75
Q2SUF2	Transcriptional regulator, TetR family OS=Burkholderia thailandensis (strain E264 / ATCC 700388 / DSM 13276 / CIP 106301) GN=BTH_I2940 - [Q2SUF2_BURTA]	0	6.22853e+06	8.90826e+06				11.692	3	4	14.9903	5	5	215	22.8658	26.05
Q2SZD9	Acetyl-CoA carboxylase, biotin carboxyl carrier protein OS=Burkholderia thailandensis (strain E264 / ATCC 700388 / DSM 13276 / CIP 106301) GN=accB - [Q2SZD9_BURTA]	8.69157e+07	1.37014e+08	7.31213e+07							9.21235	2	3	157	16.1645	24.84
Q2SZ29	YceI-like family protein OS=Burkholderia thailandensis (strain E264 / ATCC 700388 / DSM 13276 / CIP 106301) GN=BTH_I1273 - [Q2SZ29_BURTA]	0	1.57151e+07	2.56066e+07				12.1987	3	4	8.16689	2	3	187	20.1491	20.86
Q2SZK9	Glutathione S-transferase N-terminal domain protein OS=Burkholderia thailandensis (strain E264 / ATCC 700388 / DSM 13276 / CIP 106301) GN=BTH_I1087 - [Q2SZK9_BURTA]	1.66172e+07	1.57388e+07	1.59023e+07	4.09679	2	2	12.6468	4	5				218	24.3917	18.35
Q2SZN3	NADH-quinone oxidoreductase subunit C OS=Burkholderia thailandensis (strain E264 / ATCC 700388 / DSM 13276 / CIP 106301) GN=nuoC - [NUOC_BURTA]	7.44258e+06	4.06278e+06	9.24252e+06	4.62289	2	2				11.5169	3	4	200	22.7757	16.5
Q2SZ84	4-hydroxy-2-oxoglutarate aldolase/2-deydro-3-deoxyphosphogluconate aldolase OS=Burkholderia thailandensis (strain E264 / ATCC 700388 / DSM 13276 / CIP 106301) GN=BTH_I1218 - [Q2SZ84_BURTA]	0	6.42395e+06	7.16728e+06				7.00103	2	2				208	21.4875	16.35
Q2SZ47	Glutathione S-transferase OS=Burkholderia thailandensis (strain E264 / ATCC 700388 / DSM 13276 / CIP 106301) GN=BTH_I1255 - [Q2SZ47_BURTA]	3.51394e+06	2.89591e+06	1.5415e+07				6.22337	2	2				203	22.8398	14.78
Q2SU52	30S ribosomal protein S4 OS=Burkholderia thailandensis (strain E264 / ATCC 700388 / DSM 13276 / CIP 106301) GN=rpsD - [RS4_BURTA]	0	3.72785e+06	5.11403e+06				5.18724	2	2	7.58319	3	3	207	23.1674	13.53
Q2SYB4	Riboflavin synthase, alpha subunit OS=Burkholderia thailandensis (strain E264 / ATCC 700388 / DSM 13276 / CIP 106301) GN=ribE - [Q2SYB4_BURTA]	5.6477e+06	4.41016e+06	6.11961e+06							7.98081	2	3	209	22.0765	12.92
Q2SU28	50S ribosomal protein L4 OS=Burkholderia thailandensis (strain E264 / ATCC 700388 / DSM 13276 / CIP 106301) GN=rplD - [RL4_BURTA]	0	2.30464e+06	4.93974e+06				5.05058	2	2				206	22.8521	11.17
Q2SZH3	Arginine biosynthesis bifunctional protein ArgJ OS=Burkholderia thailandensis (strain E264 / ATCC 700388 / DSM 13276 / CIP 106301) GN=argJ - [Q2SZH3_BURTA]	5.93682e+06	3.96925e+06	1.58832e+07	6.9424	3	3							424	44.2018	9.67

## Sheet: BT_S12_DsbC
		Area			DMSO			S12_1st lane			S12_2nd lane			General information
Accession	Description	DMSO	S12_1st lane	S12_2nd lane	Score A2	# Peptides A2	# PSM A2	Score B2	# Peptides B2	# PSM B2	Score C2	# Peptides C2	# PSM C2	# AAs	MW [kDa]	ΣCoverage
Q2SU28	50S ribosomal protein L4 OS=Burkholderia thailandensis (strain E264 / ATCC 700388 / DSM 13276 / CIP 106301) GN=rplD - [RL4_BURTA]	3.23567e+07	5.77411e+07	1.74948e+08	22.1409	5	8	49.0002	8	16	56.5992	9	18	206	22.8521	58.74
Q2SWM0	Ankyrin repeat protein OS=Burkholderia thailandensis (strain E264 / ATCC 700388 / DSM 13276 / CIP 106301) GN=BTH_I2158 - [Q2SWM0_BURTA]	0	3.27172e+08	3.10725e+08				115.166	11	33	115.074	11	33	240	24.8122	53.33
Q2SXU5	3-oxoacyl-(Acyl-carrier-protein) reductase OS=Burkholderia thailandensis (strain E264 / ATCC 700388 / DSM 13276 / CIP 106301) GN=fabG - [Q2SXU5_BURTA]	3.05092e+07	2.0234e+07	5.50077e+07	13.3801	2	3	15.7788	3	4	19.2866	4	5	249	25.7134	34.94
Q2T1N8	Thiol:disulfide interchange protein DsbA OS=Burkholderia thailandensis (strain E264 / ATCC 700388 / DSM 13276 / CIP 106301) GN=BTH_I0353 - [Q2T1N8_BURTA]	0	6.60639e+07	1.53866e+08				27.6864	4	7	25.2204	5	7	212	23.3573	32.08
Q2SU52	30S ribosomal protein S4 OS=Burkholderia thailandensis (strain E264 / ATCC 700388 / DSM 13276 / CIP 106301) GN=rpsD - [RS4_BURTA]	8.52384e+06	1.42223e+07	2.85399e+07				18.2196	7	7	23.4473	6	8	207	23.1674	30.92
Q2SUC1	Stringent starvation protein A OS=Burkholderia thailandensis (strain E264 / ATCC 700388 / DSM 13276 / CIP 106301) GN=BTH_I2974 - [Q2SUC1_BURTA]	8.03981e+06	3.75751e+07	3.70479e+07				16.2291	4	6	18.8724	5	6	203	23.6653	28.08
Q2T512	DSBA-like thioredoxin domain, putative OS=Burkholderia thailandensis (strain E264 / ATCC 700388 / DSM 13276 / CIP 106301) GN=BTH_II1542 - [Q2T512_BURTA]	0	7.88424e+06	1.83675e+07				7.2801	3	3	15.5165	3	5	232	25.0477	21.12
Q2SUF2	Transcriptional regulator, TetR family OS=Burkholderia thailandensis (strain E264 / ATCC 700388 / DSM 13276 / CIP 106301) GN=BTH_I2940 - [Q2SUF2_BURTA]	0	4.43575e+06	9.34241e+06				11.365	3	4	10.9278	3	4	215	22.8658	16.28
Q2SZ47	Glutathione S-transferase OS=Burkholderia thailandensis (strain E264 / ATCC 700388 / DSM 13276 / CIP 106301) GN=BTH_I1255 - [Q2SZ47_BURTA]	8.35577e+06	1.29456e+07	2.72405e+07				6.55324	2	2	9.92721	2	3	203	22.8398	14.78
Q2SUH5	Thiol:disulfide interchange protein DsbC, putative OS=Burkholderia thailandensis (strain E264 / ATCC 700388 / DSM 13276 / CIP 106301) GN=BTH_I2917 - [Q2SUH5_BURTA]	9.07533e+06	2.57731e+06	1.39744e+07				8.50296	2	2	10.7499	2	3	242	25.6424	13.64
Q2STB3	Transcriptional regulator, MarR family OS=Burkholderia thailandensis (strain E264 / ATCC 700388 / DSM 13276 / CIP 106301) GN=BTH_I3344 - [Q2STB3_BURTA]	7.22391e+06	5.26767e+06	7.53932e+06							4.878	2	2	270	29.3682	9.26
Q2SU25	Elongation factor Tu OS=Burkholderia thailandensis (strain E264 / ATCC 700388 / DSM 13276 / CIP 106301) GN=tuf1 - [EFTU_BURTA]	0	4.01765e+06	5.97231e+06				8.25176	3	3	5.89229	2	2	396	42.9641	8.84
Q2STU0	Adenosylhomocysteinase OS=Burkholderia thailandensis (strain E264 / ATCC 700388 / DSM 13276 / CIP 106301) GN=ahcY - [SAHH_BURTA]	0	3.51181e+07	38976114				9.10432	2	2				473	52.1274	7.19

## Sheet: LM_S08_FMND-L
		Area			DMSO			S08_1st lane			S08_2nd lane			General information
Accession	Description	DMSO	S08_1st lane	S08_2nd lane	Score A2	# Peptides A2	# PSM A2	Score B2	# Peptides B2	# PSM B2	Score C2	# Peptides C2	# PSM C2	# AAs	MW [kDa]	ΣCoverage
Q8Y5W6	Cytidylate kinase OS=Listeria monocytogenes GN=cmk - [KCY_LISMO]	0	1.87862e+08	1.02668e+08				42.027	9	15	58.5682	10	17	224	24.8021	52.68
Q8Y859	Lmo1059 protein OS=Listeria monocytogenes GN=lmo1059 - [Q8Y859_LISMO]	0	1.83484e+09	1.6322e+09				123.109	13	44	119.937	13	38	176	19.9151	46.02
Q8Y3P3	Lmo2792 protein OS=Listeria monocytogenes GN=lmo2792 - [Q8Y3P3_LISMO]	5.88674e+06	3.41016e+08	1.57113e+08	5.23976	2	2	57.2712	8	21	49.679	10	18	252	28.9039	38.1
Q8Y6J6	Lmo1688 protein OS=Listeria monocytogenes GN=lmo1688 - [Q8Y6J6_LISMO]	0	9.16181e+08	6.33989e+08				118.528	9	42	109.476	11	35	248	27.1693	35.89
Q8Y729	5'-methylthioadenosine/S-adenosylhomocysteine nucleosidase OS=Listeria monocytogenes GN=mtnN - [MTNN_LISMO]	0	1.80983e+08	5.26638e+07				45.0704	7	15	26.3029	6	9	233	25.365	33.91
Q927X8	DegU OS=Listeria monocytogenes GN=degU - [Q927X8_LISMO]	0	1.02203e+08	3.14721e+07				31.9355	6	11	12.8267	4	4	228	25.7996	33.33
Q8Y4I3	Triosephosphate isomerase 1 OS=Listeria monocytogenes GN=tpiA1 - [TPIS1_LISMO]	2.98567e+07	1.74058e+08	1.85127e+08	15.4375	3	5	28.4324	4	9	35.0808	5	11	251	26.8615	32.27
Q8Y8V6	FMN-dependent NADH-azoreductase 2 OS=Listeria monocytogenes GN=azoR2 - [AZOR2_LISMO]	0	1.37464e+08	1.91609e+08				18.9338	4	6	27.6071	5	9	211	23.0811	28.91
Q8Y594	Lmo2175 protein OS=Listeria monocytogenes GN=lmo2175 - [Q8Y594_LISMO]	0	5.66634e+07	3.69492e+07				14.3184	4	5	13.3516	4	4	253	26.3794	25.3
Q8Y6L1	MenB protein OS=Listeria monocytogenes GN=menB - [Q8Y6L1_LISMO]	2.67811e+07	1.10552e+07	2.55649e+06	33.463	5	12	9.42233	2	3				272	30.0052	21.69
Q8Y4K5	Lmo2433 protein OS=Listeria monocytogenes GN=lmo2433 - [Q8Y4K5_LISMO]	0	8.88476e+07	4.89558e+07				12.0674	3	5	16.5788	5	7	252	28.7721	21.43
P66548	30S ribosomal protein S3 OS=Listeria monocytogenes GN=rpsC - [RS3_LISMO]	0	3.01536e+07	1.11071e+07				16.7088	3	5	6.49874	2	2	218	24.527	19.27
Q8Y690	FabG protein OS=Listeria monocytogenes GN=fabG - [Q8Y690_LISMO]	0	3.92519e+07	1.53947e+07				16.5978	3	5				247	26.2315	18.62
Q8Y8V1	Lmo0791 protein OS=Listeria monocytogenes GN=lmo0791 - [Q8Y8V1_LISMO]	0	2.35549e+07	0				9.15482	3	3				216	23.9678	17.59
Q92BX8	Two-component response regulator OS=Listeria monocytogenes GN=lisR - [Q92BX8_LISMO]	0	5.71267e+07	3.17149e+07				19.7986	4	6	10.2888	3	3	226	26.4029	15.04
Q8YA22	Lmo0344 protein OS=Listeria monocytogenes GN=lmo0344 - [Q8YA22_LISMO]	0	1.05173e+07	3.48531e+06				7.23469	3	3				254	27.2444	14.57
Q8Y3N3	Ribosomal RNA small subunit methyltransferase G OS=Listeria monocytogenes GN=rsmG - [RSMG_LISMO]	0	2.28642e+07	1.13204e+07				11.6448	3	4				238	27.1408	14.29
Q8Y5F1	UPF0447 protein lmo2113 OS=Listeria monocytogenes GN=lmo2113 - [Y2113_LISMO]	0	2.28957e+07	1.58613e+07				11.1918	3	4	5.04586	2	2	251	28.8334	13.94
Q8Y5S9	Lmo1976 protein OS=Listeria monocytogenes GN=lmo1976 - [Q8Y5S9_LISMO]	0	1.68984e+07	0				11.7832	4	4				263	29.0164	13.31
Q8Y8P5	Lmo0851 protein OS=Listeria monocytogenes GN=lmo0851 - [Q8Y8P5_LISMO]	0	1.85791e+07	0				9.9559	3	4				252	29.3318	12.7
Q8Y971	ThiD protein OS=Listeria monocytogenes GN=thiD - [Q8Y971_LISMO]	1.10835e+07	1.50965e+07	0	8.52547	3	3							271	28.801	12.55
Q8Y8J4	Lmo0907 protein OS=Listeria monocytogenes GN=lmo0907 - [Q8Y8J4_LISMO]	0	4.40828e+06	0				4.74294	2	2				224	25.2086	12.5
P0A442	Pyruvate formate-lyase-activating enzyme OS=Listeria monocytogenes GN=pflA - [PFLA_LISMO]	0	2.06539e+07	4.28393e+06				6.96852	2	2				248	28.0973	12.1
Q8YA14	Lmo0352 protein OS=Listeria monocytogenes GN=lmo0352 - [Q8YA14_LISMO]	0	5.51536e+06	4.26419e+06				9.01358	2	3				254	28	11.02
Q8Y6E2	Lmo1745 protein OS=Listeria monocytogenes GN=lmo1745 - [Q8Y6E2_LISMO]	0	2.85988e+07	1.36014e+07				8.43677	2	3	7.52436	2	3	225	26.3975	10.67
Q8Y907	Lmo0735 protein OS=Listeria monocytogenes GN=lmo0735 - [Q8Y907_LISMO]	0	1.75512e+07	3.91241e+06				5.5016	2	2				223	24.8319	8.97
Q927Y2	Lmo2511 protein OS=Listeria monocytogenes GN=lmo2511 - [Q927Y2_LISMO]	0	8.38063e+07	0				12.4625	2	4				187	21.62	8.56
Q8Y846	PycA protein OS=Listeria monocytogenes GN=pycA - [Q8Y846_LISMO]	1.15254e+08	1.48761e+08	4.92982e+07	31.9848	6	10	27.6542	6	9	15.4924	5	5	1146	127.969	8.46

## Sheet: LM_S08_Lmo1967
		Area			DMSO			S08_1st lane			S08_2nd lane			General information
Accession	Description	DMSO	S08_1st lane	S08_2nd lane	Score A2	# Peptides A2	# PSM A2	Score B2	# Peptides B2	# PSM B2	Score C2	# Peptides C2	# PSM C2	# AAs	MW [kDa]	ΣCoverage
Q8Y422	Elongation factor Tu OS=Listeria monocytogenes GN=tuf - [EFTU_LISMO]	2.16404e+07	1.03413e+09	9.11369e+08				243.791	18	75	200.121	17	62	395	43.3148	64.56
Q8Y5T8	Uncharacterized protein Lmo1967 OS=Listeria monocytogenes GN=lmo1967 - [Y1967_LISMO]	0	8.51111e+08	8.4564e+08				175.511	17	52	146.895	16	45	399	45.4636	48.37
Q8Y574	3-oxoacyl-[acyl-carrier-protein] synthase 2 OS=Listeria monocytogenes GN=lmo2201 - [Q8Y574_LISMO]	2.81466e+07	1.90387e+08	2.31305e+08	13.7539	4	4	80.8765	10	24	70.2827	11	20	413	44.2521	36.56
Q8Y7C7	Acetyl-CoA carboxylase subunit (Biotin carboxylase subunit) OS=Listeria monocytogenes GN=lmo1357 - [Q8Y7C7_LISMO]	0	1.30755e+08	83254199				38.9272	12	13	17.4599	6	6	454	49.8974	31.28
Q8Y7D4	Probable glycine dehydrogenase [decarboxylating] subunit 1 OS=Listeria monocytogenes GN=gcvPA - [GCSPA_LISMO]	0	7.75395e+08	4.59893e+08				124.101	11	38	49.5586	7	14	448	49.4473	27.23
Q926X1	Lmo2779 protein OS=Listeria monocytogenes GN=lmo2779 - [Q926X1_LISMO]	0	5.67835e+07	4.65859e+07				21.0554	5	6	18.202	5	5	366	40.658	26.5
Q8YAD4	Bifunctional protein glmU OS=Listeria monocytogenes GN=glmU - [GLMU_LISMO]	0	2.64308e+07	3.09211e+07				17.7099	6	6	22.5448	6	7	457	49.7797	24.95
Q8Y7K9	ATP-dependent Clp protease ATP-binding subunit ClpX OS=Listeria monocytogenes GN=clpX - [CLPX_LISMO]	4.82307e+07	8.95323e+07	7.84085e+07	6.40032	2	2	26.2877	7	9	14.0603	5	5	419	46.3693	24.34
Q8Y8E3	Lmo0961 protein OS=Listeria monocytogenes GN=lmo0961 - [Q8Y8E3_LISMO]	0	4.81864e+07	2.34463e+07				20.2615	6	6	10.5059	3	3	408	45.7488	19.61
Q8Y846	PycA protein OS=Listeria monocytogenes GN=pycA - [Q8Y846_LISMO]	1.25798e+08	1.18982e+08	1.24259e+08	42.2301	10	13	55.9631	11	16	54.1813	10	15	1146	127.969	18.5
Q8Y5E6	Phosphoglucosamine mutase OS=Listeria monocytogenes GN=glmM - [GLMM_LISMO]	1.0079e+07	7.53592e+07	6.41584e+07	6.88469	2	2	27.0996	6	9	22.1022	6	7	450	48.4573	18.44
Q8Y6K8	MenF protein OS=Listeria monocytogenes GN=menF - [Q8Y6K8_LISMO]	1.54033e+07	3.411e+07	3.77788e+07	4.94809	2	2	20.617	5	7	18.6547	5	6	462	51.6345	12.77
Q8Y7B0	6-phosphogluconate dehydrogenase, decarboxylating OS=Listeria monocytogenes GN=lmo1376 - [Q8Y7B0_LISMO]	0	3.41456e+07	0				19.0504	5	7				472	52.3827	12.5
Q8Y4D8	Peptide chain release factor 2 OS=Listeria monocytogenes GN=prfB - [RF2_LISMO]	0	3.38649e+07	2.67946e+07				5.89778	2	2	6.16698	2	2	366	41.9697	12.3
Q8Y4B2	Serine hydroxymethyltransferase OS=Listeria monocytogenes GN=glyA - [GLYA_LISMO]	0	3.96269e+07	4.28949e+07				16.6943	4	5	11.8628	4	4	413	45.0943	11.62
Q8Y6B8	Adenylosuccinate lyase OS=Listeria monocytogenes GN=purB - [Q8Y6B8_LISMO]	0	1.93271e+07	0				11.5521	3	4				430	49.0542	9.53
Q8Y5M5	Cell division protein ftsZ OS=Listeria monocytogenes GN=ftsZ - [Q8Y5M5_LISMO]	0	2.34679e+07	3.07277e+07				6.41229	2	2	6.45692	2	2	391	41.3251	7.42
Q8Y6B7	Phosphoribosylaminoimidazole carboxylase II OS=Listeria monocytogenes GN=purK - [Q8Y6B7_LISMO]	0	1.16892e+07	5.68006e+06				6.44664	2	2				374	41.3814	6.68
Q8Y5R3	Pdp protein OS=Listeria monocytogenes GN=pdp - [Q8Y5R3_LISMO]	0	7.31524e+06	0				5.47368	2	2				433	46.0579	6.24
Q92FQ6	DnaC protein OS=Listeria monocytogenes GN=dnaC - [Q92FQ6_LISMO]	0	5.0501e+06	7.27207e+06				6.74403	2	2				450	50.0045	6.22
Q8Y5W7	Lmo1938 protein OS=Listeria monocytogenes GN=lmo1938 - [Q8Y5W7_LISMO]	0	2.468e+07	2.67869e+07				5.97145	2	2	5.97895	2	2	381	41.4065	5.51
Q8Y4M3	Lmo2414 protein OS=Listeria monocytogenes GN=lmo2414 - [Q8Y4M3_LISMO]	0	1.42058e+07	5.67008e+06				5.62546	2	2				433	48.0718	5.31

## Sheet: LM_S09_FMND-L
		Area			DMSO			S09_1st lane			S09_2nd lane			General information
Accession	Description	DMSO	S09_1st lane	S09_2nd lane	Score A2	# Peptides A2	# PSM A2	Score B2	# Peptides B2	# PSM B2	Score C2	# Peptides C2	# PSM C2	# AAs	MW [kDa]	ΣCoverage
Q8Y5S9	Lmo1976 protein OS=Listeria monocytogenes GN=lmo1976 - [Q8Y5S9_LISMO]	0	3.58821e+07	4.98743e+07				39.773	9	12	51.92	9	16	263	29.0164	46.01
Q8Y8V6	FMN-dependent NADH-azoreductase 2 OS=Listeria monocytogenes GN=azoR2 - [AZOR2_LISMO]	0	9.15629e+08	9.47999e+08				56.6727	8	19	53.2603	7	17	211	23.0811	43.13
Q8Y3P3	Lmo2792 protein OS=Listeria monocytogenes GN=lmo2792 - [Q8Y3P3_LISMO]	2.633e+07	3.99305e+08	4.18356e+08				81.1526	11	28	88.6863	11	30	252	28.9039	37.3
Q8Y859	Lmo1059 protein OS=Listeria monocytogenes GN=lmo1059 - [Q8Y859_LISMO]	0	9.74862e+07	1.79509e+08				25.9105	6	8	36.6088	7	13	176	19.9151	36.36
P66548	30S ribosomal protein S3 OS=Listeria monocytogenes GN=rpsC - [RS3_LISMO]	0	2.41043e+08	1.84722e+08				43.5909	7	14	32.867	5	11	218	24.527	34.86
Q8Y4I3	Triosephosphate isomerase 1 OS=Listeria monocytogenes GN=tpiA1 - [TPIS1_LISMO]	4.67541e+07	1.48742e+08	1.36434e+08	9.67239	3	3	29.0712	5	9	31.3394	6	10	251	26.8615	33.47
Q48746	Lmo1453 protein OS=Listeria monocytogenes GN=lmo1453 - [Q48746_LISMO]	0	9.77706e+07	7.54131e+07				32.5677	8	12	14.1853	5	5	234	26.1838	33.33
Q926W7	Partition protein, ParA homolog OS=Listeria monocytogenes GN=parA - [Q926W7_LISMO]	0	3.31366e+07	7.11116e+07				17.8008	4	5	30.1637	6	9	253	27.4537	33.2
Q8Y6J6	Lmo1688 protein OS=Listeria monocytogenes GN=lmo1688 - [Q8Y6J6_LISMO]	0	3.76403e+08	4.22998e+08				92.6137	10	32	98.7154	11	35	248	27.1693	31.85
Q8Y6L1	MenB protein OS=Listeria monocytogenes GN=menB - [Q8Y6L1_LISMO]	0	3.52262e+07	6.70531e+07				29.0784	5	9	37.7518	7	12	272	30.0052	30.15
Q8Y690	FabG protein OS=Listeria monocytogenes GN=fabG - [Q8Y690_LISMO]	0	9.02881e+07	9.75346e+07				26.8581	3	7	27.4481	4	9	247	26.2315	27.94
Q8Y971	ThiD protein OS=Listeria monocytogenes GN=thiD - [Q8Y971_LISMO]	0	3.03064e+07	5.20863e+07				14.7508	4	5	24.4061	5	8	271	28.801	26.57
Q92D54	Lmo0967 protein OS=Listeria monocytogenes GN=lmo0967 - [Q92D54_LISMO]	0	2.76668e+07	2.60059e+07				14.2608	4	4	13.3359	4	4	222	26.1215	25.68
Q8YA22	Lmo0344 protein OS=Listeria monocytogenes GN=lmo0344 - [Q8YA22_LISMO]	0	4.66392e+07	4.70902e+07				19.1422	5	6	20.2867	5	7	254	27.2444	24.02
Q8Y5W6	Cytidylate kinase OS=Listeria monocytogenes GN=cmk - [KCY_LISMO]	0	4.7628e+07	5.43903e+07				14.9259	4	5	7.39662	2	3	224	24.8021	23.66
Q927X8	DegU OS=Listeria monocytogenes GN=degU - [Q927X8_LISMO]	0	2.40938e+07	2.02787e+07				12.367	4	5	8.07332	3	3	228	25.7996	17.98
Q8Y907	Lmo0735 protein OS=Listeria monocytogenes GN=lmo0735 - [Q8Y907_LISMO]	0	0	2.20204e+07							8.77223	3	3	223	24.8319	15.7
Q8Y6E2	Lmo1745 protein OS=Listeria monocytogenes GN=lmo1745 - [Q8Y6E2_LISMO]	0	5.01645e+07	4.93121e+07				14.1609	3	5	16.77	3	6	225	26.3975	15.56
P0A442	Pyruvate formate-lyase-activating enzyme OS=Listeria monocytogenes GN=pflA - [PFLA_LISMO]	0	2.40484e+07	2.95087e+07				8.16245	2	2	10.1699	3	3	248	28.0973	15.32
Q92BX8	Two-component response regulator OS=Listeria monocytogenes GN=lisR - [Q92BX8_LISMO]	0	3.32578e+07	2.4801e+07				10.7348	3	3	8.10721	3	3	226	26.4029	15.04
Q8Y594	Lmo2175 protein OS=Listeria monocytogenes GN=lmo2175 - [Q8Y594_LISMO]	0	5.43088e+07	5.32211e+07				9.30441	3	3	11.4622	3	4	253	26.3794	14.23
Q8Y8D5	Enoyl-[acyl-carrier-protein] reductase [NADH] OS=Listeria monocytogenes GN=lmo0970 - [Q8Y8D5_LISMO]	0	0	7.78884e+06							7.68059	3	3	262	28.2766	14.12
Q8Y9K5	Lmo0522 protein OS=Listeria monocytogenes GN=lmo0522 - [Q8Y9K5_LISMO]	0	1.77985e+07	1.81596e+07				12.5952	3	4	9.64842	2	3	250	28.7128	12.8
Q8Y5A6	Lmo2162 protein OS=Listeria monocytogenes GN=lmo2162 - [Q8Y5A6_LISMO]	0	3.66238e+06	2.43476e+06				5.36389	2	2				246	27.7922	12.2
Q8Y422	Elongation factor Tu OS=Listeria monocytogenes GN=tuf - [EFTU_LISMO]	0	4.59712e+06	0				10.6401	3	3				395	43.3148	11.65
Q8Y6Q7	Tryptophan synthase alpha chain OS=Listeria monocytogenes GN=trpA - [TRPA_LISMO]	0	1.8416e+07	1.90723e+07				7.63532	3	3	7.98024	3	3	257	27.873	10.89
Q8Y6M6	30S ribosomal protein S2 OS=Listeria monocytogenes GN=rpsB - [RS2_LISMO]	0	6.46889e+06	9.64975e+06				5.38406	2	2				249	28.3569	10.44
Q8Y4K5	Lmo2433 protein OS=Listeria monocytogenes GN=lmo2433 - [Q8Y4K5_LISMO]	0	3.26587e+07	2.96434e+07				9.46448	3	4	7.18911	2	3	252	28.7721	10.32
Q8Y4S4	Lmo2358 protein OS=Listeria monocytogenes GN=lmo2358 - [Q8Y4S4_LISMO]	0	1.92243e+07	0				6.35224	2	2				243	26.9586	9.47
Q8Y846	PycA protein OS=Listeria monocytogenes GN=pycA - [Q8Y846_LISMO]	8.52824e+07	8.45086e+07	1.07795e+08	16.0011	5	5	33.312	8	10	25.231	6	7	1146	127.969	9.34
Q8Y449	Adenylate kinase OS=Listeria monocytogenes GN=adk - [KAD_LISMO]	0	1.29313e+07	1.27188e+07				4.78676	2	2	4.97354	2	2	215	24.2483	9.3
Q8YAJ4	Lmo0131 protein OS=Listeria monocytogenes GN=lmo0131 - [Q8YAJ4_LISMO]	0	0	1.27027e+07							6.0511	2	2	249	28.619	8.03
Q8Y5V2	Pnp protein OS=Listeria monocytogenes GN=pnp - [Q8Y5V2_LISMO]	0	2.3291e+07	2.49511e+07				11.472	2	4	9.00878	2	3	272	29.457	7.72

[truncated: 5 more sheets: LM_S09_Lmo1967, LM_S09_Lmo0898, LM_S10_FMND-L1+2, LM_S10_FMND-L_3+4, LM_S10_Lmo1967]
