# Supplementary material for: β-Sultams exhibit discrete binding preferences for diverse bacterial enzymes with nucleophilic residues
Source: Royal Society of Chemistry journal article supplement (doi:10.1039/c3cc46002a), 2013-10-30
Supplement: c3cc46002a_2.xlsx [file c3cc46002a_2.xlsx]

## Sheet: S09
Accession	Description	DMSO (1) A5: Area	S09 (1) B5: Area	DMSO (2) E5: Area	S09 (2) F5: Area	DMSO (3) I5: Area	S09 (3) J5: Area	S09/DMSO (1)	S09/DMSO (2)	S09/DMSO (3)	Score A2	Coverage A2	# Peptides A2	# PSM A2	Score B2	Coverage B2	# Peptides B2	# PSM B2	Score E2	Coverage E2	# Peptides E2	# PSM E2	Score F2	Coverage F2	# Peptides F2	# PSM F2	Score I2	Coverage I2	# Peptides I2	# PSM I2	Score J2	Coverage J2	# Peptides J2	# PSM J2	# AAs	MW [kDa]	calc. pI
Q8Y422	Elongation factor Tu OS=Listeria monocytogenes GN=tuf - [EFTU_LISMO]	5.59494e+10	58888344616	1.2669e+10	2.77234e+10	3.08511e+09	1.32299e+10	1.05253	2.18829	4.28831	536.904	70.38	28	171	917.631	66.58	25	268	523.526	64.56	23	168	1122.69	76.71	29	328	659.518	70.38	26	208	760.46	57.47	25	229	395	43.3148	4.91943
Q8Y4M2	Lmo2415 protein OS=Listeria monocytogenes GN=lmo2415 - [Q8Y4M2_LISMO]	7.26953e+09	11294030759	1.90187e+09	7.23202e+09	3.10859e+08	4.88037e+09	1.55361	3.80259	15.6997	130.5	64.37	12	36	220.466	78.16	14	58	156.266	47.89	10	43	305.779	50.57	11	79	103.166	53.64	9	26	329.635	82.76	13	80	261	29.1357	4.62744
Q8Y6M7	Elongation factor Ts OS=Listeria monocytogenes GN=tsf - [EFTS_LISMO]	14423908991	2.01854e+10	4.26239e+09	1.0714e+10	2.28071e+09	7.01582e+09	1.39944	2.51362	3.07615	194.365	83.33	24	60	254.906	83.33	23	76	290.084	75.17	21	87	246.689	83.33	24	75	175.808	77.89	22	51	190.591	83.33	24	57	294	32.6177	5.19873
Q8Y6M6	30S ribosomal protein S2 OS=Listeria monocytogenes GN=rpsB - [RS2_LISMO]	2.98109e+09	1.04192e+10	1.55421e+09	8.19689e+09	1.86144e+08	4.78905e+09	3.49511	5.27399	25.7276	37.8811	65.06	11	13	252.756	81.53	19	81	35.5684	49	10	13	172.282	63.86	14	57	35.3842	42.57	6	10	168.16	56.22	15	54	249	28.3569	6.18896
Q8Y859	Lmo1059 protein OS=Listeria monocytogenes GN=lmo1059 - [Q8Y859_LISMO]	7.50842e+08	6.63708e+09	5.25506e+07	1.74694e+09	8.54873e+07	1.43922e+09	8.83951	33.243	16.8355	18.3329	48.3	4	5	248.446	78.98	11	73	18.874	35.23	3	5	117.109	75	10	36	18.4261	48.3	4	5	132.486	72.16	9	40	176	19.9151	4.89404
Q9RQI6	ATP-dependent Clp protease proteolytic subunit OS=Listeria monocytogenes GN=clpP - [CLPP_LISMO]	0	2.23554e+09	0	1733988167	0	1.54385e+09	>	>	>					41.034	62.63	6	10					45.7819	76.26	7	12					56.5134	59.09	6	14	198	21.605	5.10986
Q8Y5G2	Pyridoxal biosynthesis lyase pdxS OS=Listeria monocytogenes GN=pdxS - [PDXS_LISMO]	1.50176e+09	6.01655e+09	5.50592e+08	5.79244e+09	4.87958e+08	3.0233e+09	4.00632	10.5204	6.19581	25.5748	42.37	8	8	137.417	64.75	12	38	27.5755	24.07	4	8	226.161	67.12	14	60	32.0952	34.24	8	10	216.015	58.64	10	56	295	31.7002	5.47803
Q8Y4I1	Gap protein OS=Listeria monocytogenes GN=gap - [Q8Y4I1_LISMO]	1.07713e+10	1.48521e+10	4.18044e+09	8.83054e+09	2.1634e+09	6861718589	1.37886	2.11235	3.17173	138.967	65.77	17	31	137.519	62.8	16	30	192.946	61.01	18	45	249.251	67.26	19	59	144.781	60.71	16	33	149.825	62.8	17	33	336	36.2636	5.36377
Q8Y683	Lmo1814 protein OS=Listeria monocytogenes GN=lmo1814 - [Q8Y683_LISMO]	5.26377e+08	1619987856	1.10444e+08	7.80375e+08	8.79206e+07	3.90639e+08	3.07762	7.06578	4.44309	23.7847	20.83	6	7	69.9161	47.83	17	21	18.5547	19.57	5	6	59.1387	31.88	12	17	12.0712	13.41	4	4	48.8781	33.15	11	14	552	59.3169	4.62744
Q8Y863	PdhC protein OS=Listeria monocytogenes GN=pdhC - [Q8Y863_LISMO]	9.33023e+09	1.1148e+10	3.70055e+09	9.50329e+09	1.70556e+09	6.18624e+09	1.19482	2.56808	3.62709	151.787	69.12	23	42	155.717	71.14	22	42	180.939	69.67	22	48	226.019	71.51	22	62	146.969	71.32	23	40	134.583	70.04	22	38	544	58.1586	4.85596
Q8YAR9	30S ribosomal protein S6 OS=Listeria monocytogenes GN=rpsF - [RS6_LISMO]	0	3.77615e+08	0	215929467	0	1.74983e+08	>	>	>					11.4744	40.21	3	3					10.3046	39.18	2	3					13.3609	39.18	2	3	97	11.4999	5.18604
Q926Y9	Inosine-5'-monophosphate dehydrogenase OS=Listeria monocytogenes GN=guaB - [Q926Y9_LISMO]	1.26251e+10	1.02508e+10	4.20288e+09	5.65404e+09	2.08522e+09	4.04084e+09	0.811938	1.34528	1.93785	136.516	66.39	25	40	138.617	65.57	22	40	146.568	56.76	19	42	230	68.24	23	68	89.2395	56.76	21	28	107.243	60.45	21	31	488	52.5226	6.49365
Q8Y5W9	Glycerol-3-phosphate dehydrogenase [NAD(P)+] OS=Listeria monocytogenes GN=gpsA - [GPDA_LISMO]	8.18373e+08	5305812829	2.79873e+08	1.7449e+09	1.47475e+08	1.44709e+09	6.48337	6.2346	9.81246	37.8549	52.07	10	13	134.42	68.64	15	42	34.5491	40.83	8	12	121.288	65.98	14	37	20.2252	23.67	6	7	80.533	63.91	14	22	338	36.474	5.46533
Q9S5A4	Chaperone protein DnaK OS=Listeria monocytogenes GN=dnaK - [DNAK_LISMO]	1.11999e+09	3.24302e+09	2.18481e+08	1.72777e+09	1.95756e+08	1.27571e+09	2.89558	7.90811	6.51683	50.9807	37.03	14	15	142.614	54.98	21	37	62.8344	35.24	13	20	101.712	53.51	19	28	54.3713	34.26	11	16	89.7595	54.49	19	27	613	66.1038	4.69092
Q8Y4I2	Phosphoglycerate kinase OS=Listeria monocytogenes GN=pgk - [PGK_LISMO]	3.06598e+09	4.9968e+09	2.12635e+09	3266056405	6.61378e+08	3.49633e+09	1.62976	1.53599	5.28643	52.8502	49.24	11	15	62.7788	64.14	14	19	92.318	51.26	12	26	106.412	59.85	14	31	65.7478	43.94	9	18	88.3312	60.86	13	27	396	42.078	5.09717
Q8Y4R1	Lmo2373 protein OS=Listeria monocytogenes GN=lmo2373 - [Q8Y4R1_LISMO]	2817456792	4.02338e+09	1.5183e+09	3.45344e+09	1.19288e+09	1.98204e+09	1.42802	2.27454	1.66156	10.5815	40.38	3	3	19.2328	75	5	5	18.3616	40.38	3	5	30.8	75	5	9	10.6709	40.38	3	3	24.9522	40.38	4	7	104	11.1828	4.84326
Q8Y421	Elongation factor G OS=Listeria monocytogenes GN=fusA - [EFG_LISMO]	1.711e+10	1.5828e+10	3.31007e+09	6.95621e+09	1.62021e+09	4.71407e+09	0.925075	2.10153	2.90955	510.452	57.27	30	135	411.815	61.01	29	108	484.542	53.24	26	130	540.705	64.89	34	145	413.967	50.22	26	111	504.897	53.53	31	134	695	76.8015	4.94482
Q8Y9H5	Lmo0553 protein OS=Listeria monocytogenes GN=lmo0553 - [Q8Y9H5_LISMO]	6.44846e+08	8.79768e+08	6.50594e+07	5.68933e+08	1.61488e+08	2.03889e+08	1.36431	8.74482	1.26256	21.5415	31.75	4	7	33.8045	45.02	5	10	10.0987	25.59	3	4	27.7505	40.76	5	9	12.4106	14.69	2	4	20.5253	36.97	4	6	211	23.5466	7.48877
Q8Y4I3	Triosephosphate isomerase 1 OS=Listeria monocytogenes GN=tpiA1 - [TPIS1_LISMO]	6.08333e+09	3.98987e+09	9.23013e+08	3.05349e+09	1.47155e+08	1.84031e+09	0.65587	3.30818	12.506	41.6185	40.64	6	12	30.4998	30.68	5	9	22.8912	40.64	6	7	48.2704	30.68	5	14	23.0447	26.29	4	7	36.4897	50.6	6	10	251	26.8615	4.83057
Q8Y689	FabD protein OS=Listeria monocytogenes GN=fabD - [Q8Y689_LISMO]	854420910	1.14277e+09	2.84726e+08	8.98901e+08	1.88222e+08	3.64154e+08	1.33747	3.15707	1.9347	41.655	60.38	10	12	44.0103	56.55	10	12	34.2206	45.05	8	11	37.5455	43.45	7	10	18.3354	19.17	5	6	44.4734	60.38	10	13	313	32.9133	4.85596
Q9S389	D-alanine--poly(phosphoribitol) ligase subunit 2 OS=Listeria monocytogenes GN=dltC - [DLTC_LISMO]	0	7.89641e+07	0	2.49834e+08	0	4.82237e+07	>	>	>					21.4728	71.79	2	5					19.4278	71.79	2	6					27.3731	71.79	2	7	78	9.00456	3.95459
Q8Y971	ThiD protein OS=Listeria monocytogenes GN=thiD - [Q8Y971_LISMO]	2.33658e+09	4.51192e+09	8.27912e+08	2.44553e+09	5.32075e+08	1.98134e+09	1.931	2.95385	3.7238	24.1992	45.76	8	8	25.952	37.64	7	8	23.854	32.47	6	8	33.2399	24.72	4	9	14.7313	21.4	4	5	26.6148	36.9	6	9	271	28.801	5.40186
Q8Y5T8	Uncharacterized protein Lmo1967 OS=Listeria monocytogenes GN=lmo1967 - [Y1967_LISMO]	0	3.70685e+09	0	2.6109e+09	0	1.99766e+09	>	>	>					97.6411	65.91	16	28					148.91	59.65	14	44					102.994	65.66	17	30	399	45.4636	5.42725
Q8Y8D5	Enoyl-[acyl-carrier-protein] reductase [NADH] OS=Listeria monocytogenes GN=lmo0970 - [Q8Y8D5_LISMO]	3.28611e+09	3.61431e+09	5.50542e+08	1.72955e+09	3.06214e+08	1.09985e+09	1.09988	3.14153	3.59178	39.7685	51.53	9	12	46.5782	58.78	10	12	30.4093	38.93	8	10	116.595	70.23	14	31	32.1219	29.39	6	8	68.2637	65.65	11	19	262	28.2766	5.66846
Q928M6	Lmo2411 protein OS=Listeria monocytogenes GN=lmo2411 - [Q928M6_LISMO]	8.93287e+08	3.25949e+09	2.27826e+08	2.66592e+09	1.05602e+08	2.12915e+09	3.64887	11.7016	20.1621	34.4876	32.54	9	11	92.4146	51.72	18	35	37.5992	25.22	8	10	116.498	56.9	19	39	28.4095	29.31	8	9	126.091	57.54	21	39	464	52.4829	4.91943
P0A4L3	Thioredoxin OS=Listeria monocytogenes GN=trxA - [THIO_LISMO]	2.06249e+09	2.90501e+10	7.23527e+08	2.23225e+10	3.79439e+08	1.61996e+10	14.085	30.8523	42.6935	38.2368	49.51	8	10	96.6452	68.93	11	27	44.8036	51.46	8	12	217.788	66.99	9	66	32.9296	49.51	6	9	173.446	66.99	9	49	103	11.6128	4.33545
Q8Y865	PdhA protein OS=Listeria monocytogenes GN=pdhA - [Q8Y865_LISMO]	1.51633e+09	2.22208e+09	5.50088e+08	1.63399e+09	2.60179e+08	1.10148e+09	1.46544	2.97042	4.23354	28.4948	31.81	7	8	29.5864	42.86	8	8	21.1551	33.15	6	6	52.8977	50.67	9	13	15.7689	22.37	4	4	48.4962	44.2	8	12	371	41.2414	6.46826
Q8Y7B4	Lmo1372 protein OS=Listeria monocytogenes GN=lmo1372 - [Q8Y7B4_LISMO]	0	2.19054e+08	0	1.76224e+08	0	2.28985e+08	>	>	>					18.0035	26.89	4	5					5.19214	13.6	2	2					5.48378	14.5	2	2	331	36.3269	4.90674
Q8Y4C5	Mbl protein OS=Listeria monocytogenes GN=mbl - [Q8Y4C5_LISMO]	6.21201e+08	2.79803e+09	1.59226e+08	1.81779e+09	7.11957e+07	9.92432e+08	4.50422	11.4164	13.9395	50.6243	59.52	9	14	73.4539	60.12	10	19	29.5203	25.38	4	7	101.031	60.12	9	26	33.8937	25.38	4	8	62.0386	55.59	9	17	331	35.6139	5.61768
Q927L9	50S ribosomal protein L5 OS=Listeria monocytogenes GN=rplE - [RL5_LISMO]	9.90024e+08	4188515996	4.26214e+08	2.44522e+09	2.52387e+08	1.85844e+09	4.23072	5.73707	7.36345	18.3116	45.25	5	6	35.7493	57.54	8	11	8.58168	30.17	3	3	31.5031	41.9	5	9	11.6609	30.17	3	4	30.4557	43.58	5	9	179	19.9826	9.0415
Q8Y498	FbaA protein OS=Listeria monocytogenes GN=fbaA - [Q8Y498_LISMO]	4.08498e+10	3.82155e+10	1.08661e+10	2.44428e+10	8.83998e+09	1.71337e+10	0.935512	2.24946	1.93821	94.2767	65.49	13	29	120.442	62.68	12	37	219.776	55.63	11	68	349.86	63.73	13	95	118.192	53.87	11	36	236.481	55.99	12	69	284	30.0484	5.37646
Q8Y6R4	Lmo1620 protein OS=Listeria monocytogenes GN=lmo1620 - [Q8Y6R4_LISMO]	3.2135e+09	2.9085e+09	5.5301e+08	1.09605e+09	4.33374e+08	6.05919e+08	0.905088	1.98198	1.39814	77.9067	51.49	14	21	70.2643	52.77	13	19	72.8552	44.68	11	20	59.3962	47.66	12	18	55.2621	39.79	10	15	47.0335	34.68	11	15	470	51.8171	5.07178
Q8Y701	Lmo1529 protein OS=Listeria monocytogenes GN=lmo1529 - [Q8Y701_LISMO]	3.92875e+08	8.63325e+08	1.23036e+08	8.22745e+08	3.4851e+07	1.24437e+08	2.19745	6.68702	3.57054	11.4509	55.05	3	3	29.263	42.2	2	8	9.77931	42.2	2	2	28.3455	42.2	2	7	19.1985	42.2	2	4	53.3141	42.2	2	12	109	11.9504	6.06201
Q8Y7B0	6-phosphogluconate dehydrogenase, decarboxylating OS=Listeria monocytogenes GN=lmo1376 - [Q8Y7B0_LISMO]	2.18757e+09	3.43796e+09	4.03717e+08	1.3456e+09	3.92481e+08	1.14886e+09	1.57159	3.33301	2.92718	51.6761	35.17	10	17	55.0565	34.96	11	17	54.2951	23.31	5	18	100.706	33.69	10	30	36.2582	23.52	6	14	76.3003	43.64	10	20	472	52.3827	5.21143
Q8Y8N0	Lmo0866 protein OS=Listeria monocytogenes GN=lmo0866 - [Q8Y8N0_LISMO]	5.38323e+09	3.36104e+09	1.89505e+09	2.713e+09	1.24568e+09	1.13973e+09	0.624353	1.43163	0.914952	96.598	54.23	23	29	78.8244	48.46	20	23	96.9863	45.96	22	30	106.365	54.42	23	31	106.955	50.58	21	32	84.2745	37.88	17	23	520	57.2739	9.39307
Q8Y7L0	Trigger factor OS=Listeria monocytogenes GN=tig - [TIG_LISMO]	3.23614e+08	2.50174e+09	8.80457e+07	1.29445e+09	5.34109e+07	6.47457e+08	7.73064	14.702	12.1222	27.013	21.78	5	8	57.6462	35.36	13	18	9.39098	11.71	3	3	61.9307	29.51	9	17	19.644	21.78	5	6	58.1078	36.77	9	17	427	47.8242	4.56396
Q8Y6V1	Lmo1580 protein OS=Listeria monocytogenes GN=lmo1580 - [Q8Y6V1_LISMO]	1.61186e+09	2.99036e+09	4.08035e+08	1.24289e+09	2.07068e+08	8.42987e+08	1.85523	3.04603	4.07106	34.4112	55.84	6	9	50.9156	55.84	7	13	65.1457	55.84	7	16	49.5219	55.84	8	13	44.0213	55.84	7	11	57.0999	55.84	8	14	154	16.8566	5.09717
Q8Y9J4	UPF0237 protein lmo0533 OS=Listeria monocytogenes GN=lmo0533 - [Y533_LISMO]	3.40757e+08	3.9287e+08	4.09187e+07	1.54612e+08	2.7609e+07	8.92367e+07	1.15293	3.77852	3.23216	13.0241	51.69	4	4	13.0746	51.69	4	4	9.21049	34.83	3	3	10.1745	38.2	2	3	10.0531	51.69	3	3	6.51763	30.34	2	2	89	9.93606	5.12256
Q8Y846	PycA protein OS=Listeria monocytogenes GN=pycA - [Q8Y846_LISMO]	4.58512e+10	2.75351e+10	1.90897e+10	1.54234e+10	8.39627e+09	9.87107e+09	0.600531	0.807942	1.17565	560.853	58.9	56	171	340.951	52.53	44	106	1344.76	59.77	50	415	607.278	51.57	41	189	1215.35	57.42	49	366	376.126	53.23	43	115	1146	127.969	5.5542
P66042	50S ribosomal protein L10 OS=Listeria monocytogenes GN=rplJ - [RL10_LISMO]	3.4859e+09	9.80575e+09	1.05815e+09	3.06868e+09	2.50547e+08	8.85821e+08	2.81297	2.90003	3.53555	32.046	62.65	5	7	43.3195	62.65	5	11	37.2454	62.65	5	9	37.4651	62.65	6	11	24.061	59.64	4	7	37.1117	62.65	6	8	166	17.6824	5.42725
Q8Y7H4	Tkt protein OS=Listeria monocytogenes GN=tkt - [Q8Y7H4_LISMO]	4.685e+09	4293543550	2.18047e+09	3.06587e+09	8.43812e+08	1.98802e+09	0.916445	1.40606	2.356	177.21	55.57	25	49	127.694	50.3	25	35	139.007	52.41	23	41	108.229	44.43	23	32	96.7167	49.7	22	31	108.517	40.36	22	33	664	71.7812	5.2876
Q8Y6V4	UPF0173 metal-dependent hydrolase lmo1577 OS=Listeria monocytogenes GN=lmo1577 - [Y1577_LISMO]	8.65285e+08	1.02446e+09	1.8733e+08	7.11505e+08	1.43636e+08	2.59683e+08	1.18395	3.79813	1.80792	33.4988	58.33	6	10	20.4785	51.75	5	6	12.589	37.72	4	4	19.5117	37.72	4	6	12.286	17.54	3	4	25.6302	29.39	3	7	228	24.6324	4.98291
P66611	30S ribosomal protein S7 OS=Listeria monocytogenes GN=rpsG - [RS7_LISMO]	8.5156e+07	1.07986e+09	2.57875e+07	6.74768e+08	0	3.52134e+08	12.681	26.1665	>	18.9622	26.28	2	5	13.9596	40.38	3	4	6.14497	26.28	2	2	18.0634	40.38	3	5					11.8711	40.38	3	4	156	17.8054	10.1694
Q8Y690	FabG protein OS=Listeria monocytogenes GN=fabG - [Q8Y690_LISMO]	992722836	2.56482e+09	6.95254e+08	2.1838e+09	1.57033e+08	1.56937e+09	2.58362	3.141	9.99386	16.0607	35.63	5	5	26.6511	48.99	7	8	18.597	38.06	5	5	37.6772	44.13	6	10	21.4663	28.74	4	5	23.4927	44.13	6	7	247	26.2315	5.51611
O31149	Phosphoenolpyruvate-protein phosphotransferase OS=Listeria monocytogenes GN=ptsI - [PT1_LISMO]	3997476912	7.46341e+09	1.6679e+09	4.74077e+09	5.63756e+08	2.47439e+09	1.86703	2.84236	4.38912	85.0886	36.19	15	23	83.6326	46.33	18	24	70.4485	31.47	14	22	62.3393	38.81	15	20	61.5153	23.6	13	19	61.802	35.66	13	17	572	63.1724	4.80518
Q8Y5F0	Lmo2114 protein OS=Listeria monocytogenes GN=lmo2114 - [Q8Y5F0_LISMO]	2.43958e+08	577407368	1.77619e+08	6.838e+08	5.99139e+07	3.20229e+08	2.36683	3.84981	5.34483	30.8092	50.98	6	8	34.6209	48.24	7	9	15.2716	35.69	4	4	36.1875	43.14	5	9	17.3921	31.37	3	4	30.0314	45.88	7	8	255	28.2958	5.42725
Q8YA72	Lmo0287 protein OS=Listeria monocytogenes GN=lmo0287 - [Q8YA72_LISMO]	1.20406e+09	1.11667e+09	2.08045e+08	7.46052e+08	1.17438e+08	4.56424e+08	0.927415	3.58601	3.88651	28.0704	36.71	6	9	43.0582	58.23	9	12	14.2397	17.72	4	4	55.5274	58.23	9	15	15.8806	26.58	4	5	39.7342	57.81	8	11	237	27.2719	5.05908
Q8Y6D3	Aspartyl/glutamyl-tRNA(Asn/Gln) amidotransferase subunit B OS=Listeria monocytogenes GN=gatB - [GATB_LISMO]	2.53278e+09	3.76083e+09	1.15193e+09	3007836182	3.63129e+08	1.34094e+09	1.48486	2.61114	3.69273	76.0457	43.07	15	21	81.2987	51.47	18	24	57.0311	41.81	14	18	81.7463	47.9	15	24	55.658	36.97	13	17	71.4696	52.1	18	23	476	53.2032	5.36377
Q8Y6W1	Pyruvate kinase OS=Listeria monocytogenes GN=pykA - [Q8Y6W1_LISMO]	2.88205e+09	2.33063e+09	5.01174e+08	1.40671e+09	3.33051e+08	6.33442e+08	0.80867	2.80683	1.90194	81.7287	47.69	19	26	77.882	44.27	17	23	57.3467	34.02	14	17	59.3781	37.26	15	19	62.9854	36.41	14	19	53.8125	34.19	13	17	585	62.559	5.5542
Q8Y4B2	Serine hydroxymethyltransferase OS=Listeria monocytogenes GN=glyA - [GLYA_LISMO]	3.17278e+09	2.65539e+09	1.14153e+09	2.04463e+09	5.04136e+08	1.00652e+09	0.836929	1.79113	1.99652	88.4604	53.27	15	25	67.9492	46.25	12	18	93.4941	53.03	14	27	86.2432	42.86	11	22	65.1179	38.01	10	18	53.1942	38.98	10	15	413	45.0943	5.80811
Q8Y6T3	Catabolite control protein A OS=Listeria monocytogenes GN=ccpA - [Q8Y6T3_LISMO]	0	4.82025e+08	0	4.69827e+08	0	2.03753e+08	>	>	>					44.8644	37.31	7	12					35.0884	44.48	7	12					28.3104	44.18	7	9	335	36.9603	5.40186
Q8Y7Y1	ATP-dependent Clp protease proteolytic subunit 1 OS=Listeria monocytogenes GN=clpP1 - [Q8Y7Y1_LISMO]	0	2.47248e+08	0	3.1409e+08	0	1.98353e+08	>	>	>					6.51239	14.21	2	2					14.8445	31.05	3	4					9.36457	21.58	3	3	190	21.334	5.05908
Q8Y573	3-oxoacyl-[acyl-carrier-protein] synthase 3 OS=Listeria monocytogenes GN=fabH - [FABH_LISMO]	0	5.88896e+09	0	3.23441e+09	0	2.55295e+09	>	>	>					69.012	34.94	6	19					84.6234	46.79	7	25					61.0924	46.79	7	17	312	33.9495	5.21143
Q8Y8V6	FMN-dependent NADH-azoreductase 2 OS=Listeria monocytogenes GN=azoR2 - [AZOR2_LISMO]	0	8.24832e+08	0	3.06653e+08	0	1.46963e+08	>	>	>					14.8359	36.02	4	5					9.39664	30.81	3	3					12.4443	25.12	3	4	211	23.0811	5.40186
Q8YAJ0	Lmo0135 protein OS=Listeria monocytogenes GN=lmo0135 - [Q8YAJ0_LISMO]	2.04949e+08	1.81749e+09	52149800	9.7224e+08	0	6.66356e+08	8.86804	18.6432	>	18.1814	15.46	4	5	58.376	44.47	12	17	6.90155	7.25	2	2	57.9938	42.56	11	17					47.5003	41.98	11	15	524	58.2506	5.19873
Q8Y8G1	DNA protection during starvation protein OS=Listeria monocytogenes GN=dps - [DPS_LISMO]	7.36913e+08	2.45732e+09	1.38022e+08	1.00793e+09	1.03899e+08	4.90764e+08	3.33461	7.30262	4.72348	9.00933	26.92	3	3	8.85621	21.15	2	3	8.16288	35.9	3	3	8.4893	16.03	2	3	8.39342	26.92	3	3	13.8163	41.03	3	4	156	18.0359	4.93213
Q8Y7K1	Methylenetetrahydrofolate--tRNA-(uracil-5-)-methyltransferase TrmFO OS=Listeria monocytogenes GN=trmFO - [TRMFO_LISMO]	7.28888e+08	1.192e+09	1.21516e+08	8.42392e+08	8.82096e+07	2.90947e+08	1.63537	6.93236	3.29836	39.654	29.49	6	9	71.5216	47.7	10	18	11.9135	15.44	3	3	64.2656	41.47	9	14	20.0091	22.35	6	7	44.2857	28.57	6	10	434	47.8685	5.46533
Q8Y3L1	Lmo2824 protein OS=Listeria monocytogenes GN=lmo2824 - [Q8Y3L1_LISMO]	8.8475e+08	1.74447e+09	3.99903e+08	1.00403e+09	1.66708e+08	6.51533e+08	1.97171	2.51069	3.90824	58.0483	50.63	14	18	55.38	55.95	16	17	50.5292	45.06	11	15	53.756	47.85	13	17	28.1653	29.62	7	9	47.1015	44.81	12	15	395	43.1664	5.14795
Q8Y6V0	Acetate kinase 1 OS=Listeria monocytogenes GN=ackA1 - [ACKA1_LISMO]	4.27603e+09	3460339745	1069230876	2.42378e+09	3.80006e+08	9.47821e+08	0.809241	2.26684	2.49423	68.9672	52.39	16	23	64.7571	48.87	13	21	63.8203	39.55	10	21	54.0556	39.55	11	17	45.6408	25.44	7	13	60.4127	48.87	13	18	397	43.8216	5.50342
Q8Y850	Lmo1068 protein OS=Listeria monocytogenes GN=lmo1068 - [Q8Y850_LISMO]	0	4.52045e+09	0	2740411123	0	2276183544	>	>	>					40.8868	51.75	11	11					51.2999	51.75	10	14					54.0221	56.64	11	14	286	30.7683	6.15088
Q8Y7F6	Translation initiation factor IF-2 OS=Listeria monocytogenes GN=infB - [IF2_LISMO]	1.19565e+09	2.01659e+09	8.01288e+08	1.39056e+09	1.93568e+08	8.2919e+08	1.6866	1.73541	4.28371	84.9262	46.73	20	26	120.139	52.76	24	37	79.9117	30.3	15	24	118.239	40.56	20	35	78.8623	41.72	18	25	99.1012	33.76	17	27	779	84.5239	6.3667
Q8Y445	50S ribosomal protein L18 OS=Listeria monocytogenes GN=rplR - [RL18_LISMO]	0	3.4874e+08	0	1.87031e+08	0	9.01047e+07	>	>	>					13.8852	57.98	4	4					14.2749	31.09	2	3					14.8257	31.09	2	3	119	13.088	10.0962
Q8Y3S3	UPF0189 protein lmo2759 OS=Listeria monocytogenes GN=lmo2759 - [Y2759_LISMO]	8.64733e+08	1.28906e+09	1.85821e+08	7.63887e+08	8.49951e+07	4.81779e+08	1.49071	4.11088	5.66831	33.1874	57.95	6	8	43.5117	57.95	6	10	42.3354	46.59	4	9	49.7902	53.98	5	11	20.9541	46.59	4	5	32.6257	53.98	5	8	176	18.9727	4.83057
P66054	50S ribosomal protein L11 OS=Listeria monocytogenes GN=rplK - [RL11_LISMO]	8.26174e+08	4.47947e+09	1.18568e+09	3.43369e+09	4.76192e+08	1.89246e+09	5.42195	2.89597	3.97415	19.2837	45.39	4	5	44.5485	50.35	5	11	31.2154	51.06	5	8	55.9979	56.74	7	15	19.8079	46.1	4	5	35.1014	46.1	5	10	141	14.8509	9.45166
Q8Y4S4	Lmo2358 protein OS=Listeria monocytogenes GN=lmo2358 - [Q8Y4S4_LISMO]	3.04088e+08	5.3648e+08	1.60954e+08	3.26467e+08	7.78392e+07	2.21617e+08	1.76423	2.02832	2.84712	14.8157	31.69	5	5	26.6123	49.38	7	8	14.9901	24.28	4	5	24.4106	49.38	7	8	12.9729	21.4	3	4	16.4295	34.57	5	5	243	26.9586	4.80518
Q8Y6L1	MenB protein OS=Listeria monocytogenes GN=menB - [Q8Y6L1_LISMO]	2.51135e+09	4.48085e+09	5.7826e+08	1.73021e+09	2.92681e+08	1.0113e+09	1.78424	2.9921	3.45529	56.3308	50.74	11	16	68.1065	56.99	12	20	46.2509	44.12	8	13	73.9804	52.21	10	20	66.1698	49.26	10	19	68.3549	55.88	13	20	272	30.0052	5.30029
Q8Y6Y9	50S ribosomal protein L21 OS=Listeria monocytogenes GN=rplU - [RL21_LISMO]	0	255781147	0	0	0	7.56542e+07	>		>					8.13045	36.27	3	3													8.16951	36.27	3	3	102	11.2071	9.56885
Q8YA96	DNA-directed RNA polymerase subunit beta' OS=Listeria monocytogenes GN=rpoC - [RPOC_LISMO]	5.08433e+09	2.92794e+09	1.77643e+09	2.59469e+09	8.19911e+08	1.21697e+09	0.575875	1.46062	1.48428	161.365	41.88	36	53	93.2638	27.81	24	30	190.032	32.31	26	60	140.628	34.64	27	45	104.839	31.06	23	34	110.955	29.64	24	36	1201	134.713	8.32373
Q927X8	DegU OS=Listeria monocytogenes GN=degU - [Q927X8_LISMO]	7.58793e+08	1.16148e+09	2.5859e+08	5.58161e+08	1.6115e+08	3.10315e+08	1.5307	2.15848	1.92562	20.7724	28.51	5	7	18.0113	35.09	5	6	26.1582	35.09	6	8	25.9981	40.35	7	9	24.7639	28.51	5	8	16.719	22.37	4	5	228	25.7996	6.80029
Q8Y722	Alanyl-tRNA synthetase OS=Listeria monocytogenes GN=alaS - [SYA_LISMO]	1.94005e+09	2.7746e+09	6.84171e+08	2.35845e+09	4.6262e+08	1.23567e+09	1.43017	3.44717	2.67102	69.7212	30.49	18	21	75.9682	30.83	20	23	82.0221	24.57	16	25	108.892	43.46	25	33	81.4353	26.17	16	24	82.5001	31.29	19	26	879	97.9161	5.22412
Q927L2	50S ribosomal protein L22 OS=Listeria monocytogenes GN=rplV - [RL22_LISMO]	1.2541e+08	3.69994e+08	0	7.5237e+07	0	1.12103e+08	2.95027	>	>	5.20799	21.19	2	2	20.8211	55.93	4	6					14.2786	47.46	3	4					14.2892	47.46	3	4	118	12.8661	9.99365
Q8Y458	50S ribosomal protein L13 OS=Listeria monocytogenes GN=rplM - [RL13_LISMO]	0	6.52049e+08	0	2.39617e+08	0	1.43721e+08	>	>	>					16.2816	40	3	5					12.0461	36.55	4	4					7.6918	31.03	2	2	145	16.1895	9.78857
Q8YAC3	Cysteine synthase OS=Listeria monocytogenes GN=cysK - [Q8YAC3_LISMO]	2.29146e+08	987783177	6.49161e+07	5.23306e+08	0	3.47129e+08	4.31071	8.06127	>	11.4053	21.43	3	3	20.4189	34.09	6	6	10.3465	21.43	3	3	24.9265	42.21	7	8					18.7308	38.64	6	6	308	32.1978	5.42725
P64074	Enolase OS=Listeria monocytogenes GN=eno - [ENO_LISMO]	3.11018e+08	1.11843e+09	1.68181e+08	9.45217e+08	6.96079e+07	689314418	3.59601	5.62022	9.90282	17.4689	24.19	5	5	26.9077	29.07	7	7	21.0441	21.86	5	6	33.656	43.26	10	10	10.753	10.23	3	3	33.7377	43.26	10	10	430	46.4436	4.79248
Q9AGE6	60 kDa chaperonin OS=Listeria monocytogenes GN=groL - [CH60_LISMO]	3.44763e+08	2.63286e+09	7.94171e+07	1.253e+09	1.60173e+07	8.61796e+08	7.63672	15.7775	53.8039	38.6257	18.63	4	10	89.0616	41.7	15	25	26.7626	18.08	4	8	113.045	37.64	12	31	16.6084	18.63	4	5	83.0821	46.13	14	22	542	57.3319	4.79248
Q8Y6Y3	MreB protein OS=Listeria monocytogenes GN=mreB - [Q8Y6Y3_LISMO]	729722893	2.614e+09	2.73595e+08	1.62121e+09	1.78399e+08	1194190633	3.58218	5.92559	6.69394	23.6453	28.19	6	7	49.1006	45.4	12	14	22.9775	23.15	5	7	40.49	36.2	11	12	22.3639	24.63	5	6	55.4543	45.4	14	18	337	35.4806	5.2876
Q9LAT4	ATPase OppD OS=Listeria monocytogenes GN=oppD - [Q9LAT4_LISMO]	7.40432e+08	2.11599e+09	2.9217e+08	1.74445e+09	9.3571e+07	1.00753e+09	2.85778	5.97069	10.7676	51.7493	42.18	10	15	55.4321	42.18	10	17	34.8467	38.83	9	11	65.3369	42.18	10	19	29.3105	28.49	7	9	62.6857	47.21	11	18	358	39.6876	5.99854
Q8YAB6	Endopeptidase Clp ATP-binding chain C OS=Listeria monocytogenes GN=clpC - [Q8YAB6_LISMO]	1.99363e+09	2.76675e+09	5.38734e+08	2.59158e+09	2.03784e+08	1.57632e+09	1.38779	4.81049	7.73524	55.1575	24.15	13	17	86.4624	38.29	24	27	97.4238	28.9	17	33	83.1048	39.02	22	28	63.5073	30.12	16	21	95.037	33.17	19	32	820	91.1094	7.48877
Q8Y774	Lmo1423 protein OS=Listeria monocytogenes GN=lmo1423 - [Q8Y774_LISMO]	1620535533	1.64583e+10	4.88422e+08	7554293445	3.17256e+08	6.56395e+09	10.1561	15.4667	20.6898	23.688	25	5	6	298.509	46.74	10	66	27.1752	30.07	6	8	185.916	44.93	10	44	23.1081	30.07	6	6	302.858	41.67	9	68	276	32.2089	7.59131
P60426	50S ribosomal protein L2 OS=Listeria monocytogenes GN=rplB - [RL2_LISMO]	1.76014e+09	2.23093e+09	4.0519e+08	1.02578e+09	1.41663e+08	7.21198e+08	1.26747	2.5316	5.09096	29.4449	30.32	5	10	25.6086	41.52	5	9	23.8262	30.32	4	8	41.4329	36.1	5	13	26.7511	30.32	5	9	29.0273	29.96	4	10	277	30.4864	10.5356
Q8Y7J2	Lmo1285 protein OS=Listeria monocytogenes GN=lmo1285 - [Q8Y7J2_LISMO]	0	0	0	908678332	0	1.28823e+08		>	>													4.81275	21.48	2	2					8.29685	31.11	3	3	135	15.4358	4.85596
Q8Y444	50S ribosomal protein L6 OS=Listeria monocytogenes GN=rplF - [RL6_LISMO]	6.70719e+08	1.13167e+09	5.14155e+07	5.11041e+08	0	2.24225e+08	1.68724	9.93944	>	13.9811	39.89	5	5	21.0254	41.57	5	7	7.1473	24.16	3	3	14.1768	29.21	4	5					10.9301	32.58	4	4	178	19.3885	9.74463
Q8Y8E8	Lmo0956 protein OS=Listeria monocytogenes GN=lmo0956 - [Q8Y8E8_LISMO]	2218512800	1862637986	7.4365e+08	9.03224e+08	2.92408e+08	7.73446e+08	0.839589	1.21458	2.64509	49.4739	41.38	11	14	29.1133	43.77	9	9	45.6409	42.71	10	13	40.2936	36.87	9	12	29.9119	30.24	8	9	40.0977	36.6	8	12	377	41.3877	5.71924
Q8YAF2	Methionyl-tRNA synthetase OS=Listeria monocytogenes GN=metG - [SYM_LISMO]	8.66492e+08	2.05258e+10	1.84922e+08	1.00501e+10	1.06412e+08	1.04312e+10	23.6884	54.348	98.0261	26.6936	12.2	6	8	357.248	47.59	28	108	11.905	7.68	3	4	283.133	47.59	28	90	15.7843	9.94	4	5	304.705	53.46	35	95	664	75.6036	5.07178
Q8Y6X2	Threonyl-tRNA synthetase OS=Listeria monocytogenes GN=thrS - [SYT_LISMO]	2.53011e+09	2.85023e+09	1.26491e+09	2194327760	6.18987e+08	1.29036e+09	1.12652	1.73476	2.08463	57.9724	39.38	15	17	61.861	35.47	13	18	58.3219	27.03	11	18	70.5731	37.19	14	22	53.513	26.72	10	16	60.5475	32.03	12	19	640	73.1942	5.35107
Q8Y495	CTP synthase OS=Listeria monocytogenes GN=pyrG - [PYRG_LISMO]	2.2191e+09	3.10263e+09	6.07188e+08	2.65642e+09	4.83425e+08	1.15744e+09	1.39815	4.37496	2.39425	60.5861	37.59	14	18	70.489	44.92	13	20	46.4527	33.83	8	14	67.286	43.8	14	19	45.5884	34.4	10	13	75.7922	42.67	12	20	532	59.5298	5.8335
Q8Y674	Lmo1825 protein OS=Listeria monocytogenes GN=lmo1825 - [Q8Y674_LISMO]	246982821	5.64449e+08	5.69691e+07	2.02189e+08	3.5869e+07	126479298	2.28538	3.5491	3.52615	4.57498	6.27	2	2	5.14093	8.27	2	2	7.6024	6.27	2	3	5.64876	6.27	2	2	5.53609	6.27	2	2	6.9932	9.02	3	3	399	43.3385	6.55127
Q8Y574	3-oxoacyl-[acyl-carrier-protein] synthase 2 OS=Listeria monocytogenes GN=lmo2201 - [Q8Y574_LISMO]	5.77823e+09	5983101332	8.41205e+08	2.48532e+09	1.01515e+09	1.39729e+09	1.03546	2.95447	1.37644	60.69	43.58	8	17	43.8799	43.58	8	12	54.2115	38.5	7	15	74.7555	44.07	8	19	56.1984	43.58	8	16	56.3036	51.82	9	14	413	44.2521	5.43994
O85046	D-alanine aminotransferase OS=Listeria monocytogenes GN=dat - [DAAA_LISMO]	3.68959e+08	6.92991e+08	3.00834e+08	6.22578e+08	1.90554e+08	7.02818e+08	1.87824	2.06951	3.68828	18.3835	26.99	4	5	19.2472	16.61	4	5	5.05955	6.92	2	2	6.31077	10.38	2	2	5.57424	10.03	2	2	6.60903	10.38	2	2	289	32.3828	5.24951
Q8Y767	Lmo1434 protein OS=Listeria monocytogenes GN=lmo1434 - [Q8Y767_LISMO]	1.03191e+09	1.76106e+09	5.40927e+08	1.48623e+09	1.9401e+08	1.15059e+09	1.70661	2.74756	5.93058	30.1683	24.32	9	9	66.7313	38.56	13	20	47.9478	20.54	7	13	59.1148	38.56	11	16	28.4973	16.58	5	8	47.3376	20.9	7	13	555	61.8707	6.15088
P58695	Asparaginyl-tRNA synthetase OS=Listeria monocytogenes GN=asnS - [SYN_LISMO]	2.18013e+09	3244353191	5.64959e+08	1.1134e+09	4.05434e+08	9.15888e+08	1.48815	1.97076	2.25903	42.0094	41.4	10	13	65.1136	44.88	12	20	29.9469	26.98	8	10	109.368	49.77	13	32	46.7056	44.88	11	14	55.9435	40.7	10	17	430	48.9675	5.12256
Q8Y853	UPF0637 protein lmo1065 OS=Listeria monocytogenes GN=lmo1065 - [Y1065_LISMO]	569802656	8.60469e+08	2.26466e+08	5.89767e+08	9.04739e+07	4.9796e+08	1.51012	2.60422	5.5039	19.1626	26.96	4	5	14.0629	32.84	5	5	17.6053	26.96	4	5	21.2337	39.22	7	8	16.4369	26.96	4	5	24.9005	34.31	7	8	204	23.7033	7.25439
Q8Y583	Lmo2188 protein OS=Listeria monocytogenes GN=lmo2188 - [Q8Y583_LISMO]	3.68918e+09	3.76714e+09	1.22169e+09	4.53112e+09	664396210	1.9395e+09	1.02113	3.7089	2.91918	110.334	46.59	21	33	94.0347	45.42	19	28	87.9825	34.78	15	26	103.775	42.93	20	32	64.7597	35.77	15	20	62.3375	37.1	14	18	601	68.5311	4.95752
Q92AU6	Lmo1711 protein OS=Listeria monocytogenes GN=lmo1711 - [Q92AU6_LISMO]	1.364e+09	1779140070	3.00634e+08	7.94307e+08	1.37722e+08	4.92376e+08	1.30436	2.6421	3.57515	32.9106	28.54	8	10	32.9952	25.85	7	10	30.5988	28.54	8	10	26.8417	22.68	7	9	16.8029	17.32	5	6	24.5609	25.37	8	9	410	44.9314	4.76709
Q8Y7C5	Bifunctional protein FolD OS=Listeria monocytogenes GN=folD - [FOLD_LISMO]	1.74326e+09	2.41831e+09	7.44335e+08	1.69967e+09	2.06307e+08	1.03985e+09	1.38723	2.28347	5.04031	28.7054	42.61	8	9	32.6985	48.24	8	10	21.8626	28.52	6	8	22.1703	32.04	6	7	23.9153	28.52	6	9	23.965	35.21	7	8	284	30.8875	5.60498
Q8Y3K6	Lmo2829 protein OS=Listeria monocytogenes GN=lmo2829 - [Q8Y3K6_LISMO]	0	2.93207e+08	0	4.3623e+08	0	0	>	>						12.5699	44.22	4	4					4.82706	19.1	2	2									199	22.1962	4.81787
Q8Y836	Lmo1082 protein OS=Listeria monocytogenes GN=lmo1082 - [Q8Y836_LISMO]	3.06759e+08	451826123	8.73887e+07	239928955	6.77268e+07	1.64822e+08	1.4729	2.74554	2.43363	15.5601	34.41	5	5	18.2981	37.63	5	6	8.64218	23.66	3	3	12.1887	24.19	3	4	15.5884	29.57	4	5	6.02815	15.59	2	2	186	21.0916	5.99854
Q8Y6T1	Lmo1602 protein OS=Listeria monocytogenes GN=lmo1602 - [Q8Y6T1_LISMO]	0	4.68918e+08	0	0	0	6.94724e+07	>		>					14.2135	50.99	4	5													11.8691	49.01	4	4	151	16.0837	6.80029
Q8Y866	Peptide deformylase OS=Listeria monocytogenes GN=def - [DEF_LISMO]	1.44073e+08	2.35058e+08	7551300	0	4.11918e+07	1.59826e+08	1.63152		3.88005	8.72574	29.51	3	3	12.6193	29.51	3	4	6.12723	22.95	2	2					5.93433	22.95	2	2	6.33916	23.5	2	2	183	20.6305	5.30029
Q8Y782	Lmo1414 protein OS=Listeria monocytogenes GN=lmo1414 - [Q8Y782_LISMO]	6.44692e+08	1063158627	2.13505e+08	5.33875e+08	6.99614e+07	3.51384e+08	1.6491	2.50052	5.02254	27.3368	34.96	7	7	32.4976	37.53	8	9	15.6555	17.74	4	4	42.7788	41.39	9	12	17.1088	21.85	5	5	39.4833	35.22	8	10	389	41.0505	5.16064
Q8Y7K9	ATP-dependent Clp protease ATP-binding subunit ClpX OS=Listeria monocytogenes GN=clpX - [CLPX_LISMO]	2.63333e+09	6.31045e+09	6.70789e+08	3.99296e+09	2.39622e+08	2.00172e+09	2.39637	5.95263	8.35368	56.5592	43.44	15	17	81.6673	45.35	15	23	61.0116	36.52	12	20	80.6766	45.11	14	23	42.9812	30.07	8	13	83.4203	46.54	15	25	419	46.3693	4.81787
Q8Y6K8	MenF protein OS=Listeria monocytogenes GN=menF - [Q8Y6K8_LISMO]	1.58335e+09	1.74175e+09	3.29653e+08	8.96994e+08	1.7144e+08	6.48525e+08	1.10004	2.72102	3.78281	51.3454	29	12	16	39.9182	32.68	11	12	44.6666	30.74	12	14	55.3883	30.52	11	18	39.4996	28.79	10	12	39.8699	28.57	11	13	462	51.6345	5.8335
Q8Y3P9	Catalase OS=Listeria monocytogenes GN=kat - [CATA_LISMO]	2184850524	2.44648e+09	8.04503e+08	2.43611e+09	3.76964e+08	1.47556e+09	1.11975	3.02809	3.91434	84.1846	46.93	20	27	72.223	46.52	18	24	47.62	32.17	11	15	58.3067	39.75	15	17	50.0074	34.02	13	16	70.7478	44.67	17	22	488	55.8538	5.59229
Q8Y970	Lmo0663 protein OS=Listeria monocytogenes GN=lmo0663 - [Q8Y970_LISMO]	1.92396e+08	2.82455e+09	6.26169e+07	1.50408e+09	2.06424e+07	3.88365e+08	14.6809	24.0203	18.8139	4.98184	10.76	2	2	108.316	43.06	8	32	8.43257	14.24	3	3	36.3977	38.89	7	13	4.7196	8.68	2	2	37.0254	45.83	8	11	288	32.2921	4.95752
Q8Y6T6	30S ribosomal protein S4 OS=Listeria monocytogenes GN=rpsD - [RS4_LISMO]	2.34523e+09	2.24062e+09	2.43299e+08	9.15427e+08	2.07015e+08	6.01142e+08	0.955397	3.76256	2.90385	40.8963	41.5	8	13	30.9274	34.5	5	9	24.2969	31.5	5	8	40.1234	39.5	6	11	12.4097	12.5	3	4	37.8404	39.5	6	10	200	22.721	10.0669
Q8Y3P3	Lmo2792 protein OS=Listeria monocytogenes GN=lmo2792 - [Q8Y3P3_LISMO]	2.23446e+09	4.67842e+09	9.36561e+08	2.59324e+09	5.7622e+08	2.03076e+09	2.09376	2.7689	3.52427	38.5248	45.24	7	10	25.55	37.7	6	7	32.8513	37.7	6	9	26.8287	37.7	6	8	37.3762	50	8	11	29.8719	37.7	6	8	252	28.9039	7.38623
Q8Y4K5	Lmo2433 protein OS=Listeria monocytogenes GN=lmo2433 - [Q8Y4K5_LISMO]	8.28205e+08	847068500	0	0	8.60975e+07	3.75927e+08	1.02278		4.3663	11.6911	22.22	3	4	5.11349	14.29	2	2									10.2878	28.17	4	4	5.07153	11.11	2	2	252	28.7721	5.13525
O32823	Thioredoxin reductase OS=Listeria monocytogenes GN=trxB - [TRXB_LISMO]	6.3789e+08	1.63913e+09	1.73134e+08	7.62197e+08	1.18352e+08	5.0737e+08	2.56961	4.40236	4.28694	17.7858	14.11	3	5	33.6724	29.78	6	9	11.1062	13.48	3	4	51.0124	22.26	4	11	14.2756	17.87	4	5	19.5513	26.02	5	6	319	34.1524	4.90674
Q8Y6E3	Lmo1744 protein OS=Listeria monocytogenes GN=lmo1744 - [Q8Y6E3_LISMO]	2.74264e+08	7.69766e+08	7.18313e+07	4.03097e+08	4.25568e+07	2.85405e+08	2.80666	5.61172	6.70646	29.2686	30.93	6	8	29.3272	39.18	9	9	16.6327	27.49	5	5	27.7486	29.55	6	9	20.1766	26.12	5	7	43.4528	38.49	8	13	291	32.7197	5.08447
Q8Y5X5	Chorismate synthase OS=Listeria monocytogenes GN=aroC - [AROC_LISMO]	1.64543e+09	2723180884	4.53213e+08	8.78509e+08	1.76194e+08	1274870654	1.655	1.9384	7.23562	41.8228	36.34	9	13	43.4426	30.93	9	13	44.5666	36.6	10	14	44.7327	26.55	6	12	31.6163	28.09	7	9	42.0725	36.6	9	14	388	42.1457	7.07861
Q92A74	Hup protein OS=Listeria monocytogenes GN=hup - [Q92A74_LISMO]	0	3.45844e+08	0	2.6095e+08	0	1.60906e+08	>	>	>					12.4367	37.36	4	4					9.3169	17.58	2	3					12.7957	37.36	4	4	91	9.87638	9.64209
Q8Y864	PdhB protein OS=Listeria monocytogenes GN=PdhB - [Q8Y864_LISMO]	1.02478e+08	3.71852e+08	0	2.98909e+08	2.559e+07	1.83834e+08	3.62859	>	7.18382	20.2149	19.38	4	6	27.6462	26.77	6	8					12.2814	24	4	4	8.74858	14.46	2	2	27.6697	27.69	5	8	325	35.2882	4.86865
Q8Y5V7	ResD protein OS=Listeria monocytogenes GN=resD - [Q8Y5V7_LISMO]	5.33654e+08	2.15847e+09	1.60704e+08	8.04594e+08	0	3.50333e+08	4.0447	5.00667	>	5.87089	13.03	2	2	8.5875	23.95	3	3	6.54891	13.03	2	2	17.4669	36.97	4	5					9.65873	24.37	3	3	238	27.4362	5.21143
Q8Y6D2	Glutamyl-tRNA(Gln) amidotransferase subunit A OS=Listeria monocytogenes GN=gatA - [GATA_LISMO]	1.38656e+10	1.06725e+10	4.46466e+09	6.08572e+09	2.62985e+09	4385125012	0.769713	1.36309	1.66744	96.309	45.34	17	30	81.9608	42.65	15	25	79.2908	40.99	14	24	80.4848	42.65	15	25	59.1228	40.17	12	17	81.385	35.4	12	25	483	52.3195	5.04639
Q8Y5M1	UDP-N-acetylmuramoylalanine--D-glutamate ligase OS=Listeria monocytogenes GN=murD - [MURD_LISMO]	8.52752e+08	1.40558e+09	4.9588e+08	9.102e+08	2.12142e+08	3.2907e+08	1.64829	1.83552	1.55118	58.7391	38.46	10	16	42.4514	32.31	8	10	40.4676	35.16	9	12	43.204	21.76	5	10	33.8904	17.8	4	8	52.1356	25.49	6	11	455	50.399	5.75732
P66484	30S ribosomal protein S19 OS=Listeria monocytogenes GN=rpsS - [RS19_LISMO]	612406222	6.33167e+08	6.56154e+07	1.69637e+08	5.8158e+07	1.43838e+08	1.0339	2.58532	2.47323	6.03505	27.17	2	2	6.67544	27.17	2	2	5.59918	27.17	2	2	9.48146	27.17	2	3	6.18359	27.17	2	2	6.4624	27.17	2	2	92	10.4685	9.93506
Q8Y6V3	Lmo1578 protein OS=Listeria monocytogenes GN=lmo1578 - [Q8Y6V3_LISMO]	2.18763e+09	3.61286e+09	7.48681e+08	1.8527e+09	4.66825e+08	1.24092e+09	1.6515	2.47462	2.65821	70.5061	40.82	12	23	233.368	48.22	13	71	34.6646	28.22	8	10	93.0982	40.55	13	29	34.181	32.33	9	10	62.6045	47.95	13	21	365	40.2817	4.99561
Q8Y5H3	Lmo2089 protein OS=Listeria monocytogenes GN=lmo2089 - [Q8Y5H3_LISMO]	0	1.93039e+09	0	785586846	0	6.11121e+08	>	>	>					23.3025	27.09	5	7					27.5763	38.9	6	9					31.9345	27.09	5	9	347	38.4322	6.59521
Q8Y822	GMP synthase [glutamine-hydrolyzing] OS=Listeria monocytogenes GN=guaA - [GUAA_LISMO]	6.11313e+08	1194123592	7.31401e+07	5.19006e+08	8.27358e+07	3.87334e+08	1.95337	7.09606	4.68158	43.0563	34.17	11	13	52.4299	29.15	9	18	21.4886	12.74	4	7	44.0375	33.78	9	14	18.3284	18.53	6	6	34.6206	35.71	10	12	518	58.0776	5.07178
Q8Y6B1	Peptidase T OS=Listeria monocytogenes GN=pepT - [PEPT_LISMO]	9.74214e+08	1.18091e+09	2.71336e+08	7.2598e+08	1.63395e+08	2.88284e+08	1.21217	2.67558	1.76434	43.143	38.78	12	14	41.3708	39.51	11	13	32.0425	36.83	9	10	34.2777	23.9	7	11	36.8488	31.46	8	12	20.4897	22.68	6	7	410	45.7051	5.08447
Q8Y7I9	S-ribosylhomocysteine lyase OS=Listeria monocytogenes GN=luxS - [LUXS_LISMO]	1.96002e+09	1.45469e+09	4.28416e+08	7.90865e+08	3.17858e+08	6.3221e+08	0.742183	1.84602	1.98897	29.2509	43.23	6	10	18.07	37.42	4	6	20.0034	30.32	5	7	12.9334	23.87	3	4	18.8833	25.81	4	7	20.4546	26.45	3	7	155	17.3565	5.50342
Q8Y653	Manganese-binding lipoprotein mntA OS=Listeria monocytogenes GN=mntA - [MNTA_LISMO]	3.50652e+08	2.48786e+09	0	1.16705e+09	0	1.08246e+09	7.09496	>	>	7.04925	8.71	2	2	42.8473	35.81	8	13					33.6929	30.65	5	9					41.5508	31.29	6	11	310	34.3957	5.63037
Q8Y570	Chaperone protein ClpB OS=Listeria monocytogenes GN=clpB - [CLPB_LISMO]	1.55384e+09	2322224883	3.11348e+08	1.12202e+09	2.16167e+08	7.90163e+08	1.49451	3.60376	3.65534	93.4324	34.76	16	27	86.1387	34.53	16	24	80.6865	31.76	14	23	89.9013	34.3	17	27	81.1957	32.91	15	23	105.699	32.22	14	29	866	97.503	5.05908
Q92CE7	Lmo1257 protein OS=Listeria monocytogenes GN=lmo1257 - [Q92CE7_LISMO]	4.51854e+08	0	1.14413e+08	3.03742e+08	8.37485e+07	2.09803e+08		2.6548	2.50516	5.68928	15.58	2	2					6.99433	22.08	3	3	7.8152	22.08	3	3	6.89551	22.08	3	3	4.84568	16.88	2	2	154	18.0822	5.021
Q8Y848	UPF0358 protein lmo1070 OS=Listeria monocytogenes GN=lmo1070 - [Y1070_LISMO]	1.84667e+09	3.2159e+09	2.28968e+08	9.54784e+08	1.56503e+08	6.40005e+08	1.74146	4.16994	4.08942	16.589	35.48	5	6	25.41	47.31	7	10	9.69796	33.33	3	4	24.2351	47.31	6	9	15.9225	39.78	4	6	15.403	39.78	5	6	93	10.7366	5.94775
Q8Y6J6	Lmo1688 protein OS=Listeria monocytogenes GN=lmo1688 - [Q8Y6J6_LISMO]	2.7041e+08	9.87497e+09	8.21654e+07	2.68022e+09	4.14224e+07	2.33195e+09	36.5186	32.6198	56.2969	10.4453	13.71	3	3	36.0975	28.63	7	12	13.2221	17.74	3	4	85.8038	43.55	9	27	18.5635	13.71	3	5	67.5293	39.11	10	20	248	27.1693	6.37939
P28764	Superoxide dismutase [Mn] OS=Listeria monocytogenes GN=sodA - [SODM_LISMO]	1.09697e+09	1.17764e+09	0	5.07423e+08	0	3.97852e+08	1.07354	>	>	8.76521	13.86	2	3	11.9918	24.26	3	4					16.7334	28.71	4	5					17.5565	42.57	5	5	202	22.6172	5.41455
Q8Y8D1	Lmo0977 protein OS=Listeria monocytogenes GN=lmo0977 - [Q8Y8D1_LISMO]	9.27714e+08	1.60332e+09	2.64913e+08	9.52727e+08	1.28072e+08	4.58586e+08	1.72825	3.59638	3.5807	20.5547	35.34	6	6	35.4155	32.53	6	10	22.6652	24.9	4	6	40.4992	40.56	6	11	21.664	24.9	4	6	30.3194	35.34	7	8	249	28.8857	5.49072
Q8Y764	Aspartate-semialdehyde dehydrogenase OS=Listeria monocytogenes GN=lmo1437 - [Q8Y764_LISMO]	967486861	1.42893e+09	4.4407e+08	9.94885e+08	2.59354e+08	6.26235e+08	1.47695	2.24038	2.4146	22.1169	23.63	4	6	33.361	34.87	6	9	24.3629	31.41	6	8	23.0783	31.7	5	7	30.3482	27.38	6	9	44.2877	39.19	6	11	347	37.5755	5.60498
Q8Y8A1	2,3,4,5-tetrahydropyridine-2,6-dicarboxylate N-acetyltransferase OS=Listeria monocytogenes GN=dapH - [DAPH_LISMO]	1.55515e+09	2.12443e+09	6.7953e+08	1.86469e+09	2.99569e+08	1.19962e+09	1.36606	2.74409	4.0045	39.8449	46.61	8	11	36.5677	41.1	9	11	53.0308	46.61	8	15	64.956	41.1	7	17	39.7325	46.61	8	11	53.2617	41.1	7	15	236	24.8191	5.07178
Q8Y5B2	Ribonucleoside-diphosphate reductase OS=Listeria monocytogenes GN=lmo2155 - [Q8Y5B2_LISMO]	2.91639e+09	1.78801e+09	4.47784e+08	9.40208e+08	2.63846e+08	5.84396e+08	0.61309	2.09969	2.21491	76.4244	36.57	19	24	67.3216	32.77	17	20	60.06	28.7	15	19	60.4555	28.57	14	19	59.6407	30.14	15	19	53.4206	28.57	14	17	763	87.34	5.8208
Q8Y6X8	Glutamate-1-semialdehyde 2,1-aminomutase 1 OS=Listeria monocytogenes GN=hemL1 - [GSA1_LISMO]	7.05101e+08	4.73603e+08	86795604	7.54744e+08	6.93048e+07	1.76338e+08	0.671681	8.69565	2.54438	19.719	19.11	5	7	20.0247	14.45	4	6	6.54748	7.69	2	2	30.1406	35.66	8	10	6.95299	7.69	2	2	20.5226	25.87	6	7	429	46.5739	5.64307
Q8Y8D0	Branched-chain-amino-acid aminotransferase OS=Listeria monocytogenes GN=lmo0978 - [Q8Y8D0_LISMO]	2214316529	3.57198e+09	5.73918e+08	2.02934e+09	3.73408e+08	1.09371e+09	1.61313	3.53594	2.929	17.2578	20.94	5	5	27.0947	33.33	8	8	23.873	28.32	6	7	23.4805	31.27	7	7	24.5717	25.37	6	8	21.2163	28.32	6	6	339	37.3525	5.2749
Q8Y5G1	Glutamine amidotransferase subunit pdxT OS=Listeria monocytogenes GN=pdxT - [PDXT_LISMO]	7.12566e+08	6.75014e+08	7.80765e+07	2.55929e+08	6.48915e+07	2.90684e+08	0.9473	3.27793	4.47954	5.36439	18.62	2	2	15.236	32.45	3	5	7.79782	18.62	2	2	11.7775	18.62	2	3	7.76988	18.62	2	2	19.5316	44.68	4	5	188	20.4867	5.41455
Q8YAB9	tRNA-dihydrouridine synthase OS=Listeria monocytogenes GN=lmo0227 - [Q8YAB9_LISMO]	0	8.87612e+08	0	3.93376e+08	0	3.94397e+08	>	>	>					32.4147	33.84	7	9					34.0833	27.49	6	10					32.3084	32.93	7	10	331	36.7669	6.44287
P0A3L1	Translation initiation factor IF-3 OS=Listeria monocytogenes GN=infC - [IF3_LISMO]	2.94592e+09	3.57492e+09	5.25972e+08	1.09747e+09	4.28469e+08	1.08034e+09	1.21352	2.08656	2.52139	30.7611	46.2	7	10	33.4965	46.2	8	11	18.3475	46.2	5	6	18.2879	33.33	4	6	12.5947	32.16	4	4	25.2678	46.2	7	9	171	19.6345	9.53955
Q8Y4P5	Ferredoxin--NADP reductase 2 OS=Listeria monocytogenes GN=lmo2390 - [FENR2_LISMO]	4.6741e+08	1.11126e+09	3.35382e+08	1.11826e+09	1.56431e+08	6.83036e+08	2.37749	3.3343	4.36638	22.2558	21.75	3	5	16.6427	30.21	5	5	16.1362	21.75	3	4	29.4005	35.05	6	8	13.5982	25.68	4	4	22.5566	25.68	4	6	331	36.4036	5.42725
Q8Y915	Glucosamine--fructose-6-phosphate aminotransferase [isomerizing] OS=Listeria monocytogenes GN=glmS - [GLMS_LISMO]	2905137538	1.65081e+09	8.15769e+08	1.65124e+09	3.8069e+08	5.91185e+08	0.568239	2.02415	1.55293	89.7414	34.44	14	23	88.1882	34.61	13	22	79.5544	39.27	13	21	54.2779	31.95	11	15	69.6364	32.78	15	19	62.5139	34.28	12	16	601	65.726	5.30029
Q8Y577	Tryptophanyl-tRNA synthetase OS=Listeria monocytogenes GN=trpS - [SYW_LISMO]	1.83807e+08	4.90706e+08	1.77308e+08	4.69867e+08	5.73657e+07	2.62412e+08	2.66969	2.65	4.57436	20.7729	27.19	5	6	25.8912	30.51	7	8	20.0471	27.49	6	6	28.5359	29.91	6	9	18.9321	15.11	3	5	27.4767	30.51	6	8	331	36.8693	7.38623
Q8Y8E7	Glucosamine-6-phosphate deaminase OS=Listeria monocytogenes GN=nagB - [NAGB_LISMO]	3.14465e+09	2.52436e+09	6.99854e+08	9.24105e+08	5.3434e+08	9.68046e+08	0.80275	1.32043	1.81167	24.8549	42.31	6	8	26.7249	28.21	5	8	28.2425	41.88	6	9	26.0902	24.36	4	8	24.6997	31.2	6	8	26.9972	28.21	5	9	234	25.4949	4.91943
Q8Y825	NH(3)-dependent NAD(+) synthetase OS=Listeria monocytogenes GN=nadE - [NADE_LISMO]	8.13597e+08	1.48e+09	1.2001e+08	4.1697e+08	1.77395e+08	5.0617e+07	1.81908	3.47447	0.285335	98.8646	33.21	5	29	136.315	45.26	7	36	59.2782	30.66	4	18	130.148	32.85	4	34	25.6971	30.66	4	8	98.3457	19.71	3	26	274	30.5695	5.21143
Q8Y9G8	Lmo0560 protein OS=Listeria monocytogenes GN=lmo0560 - [Q8Y9G8_LISMO]	1.21436e+09	7.79008e+08	2.46155e+08	5.1707e+08	1.19863e+08	3.03779e+08	0.641498	2.10058	2.53438	36.8261	36.46	9	10	35.4413	36.46	8	9	26.363	27.29	8	8	28.066	27.73	7	9	23.6628	23.36	6	7	22.8433	27.73	7	7	458	49.2359	5.75732
Q8Y5N8	Isoleucyl-tRNA synthetase OS=Listeria monocytogenes GN=ileS - [SYI_LISMO]	3.63738e+09	2.53348e+09	1.68213e+09	2.64528e+09	7.30757e+08	9.52067e+08	0.696514	1.57258	1.30285	102.591	33.88	17	29	87.9878	33.55	15	24	116.932	31.05	17	34	102.39	33.77	16	30	63.0432	25.41	14	19	69.8375	28.56	13	22	921	103.785	5.31299
Q8Y6T0	Lmo1603 protein OS=Listeria monocytogenes GN=lmo1603 - [Q8Y6T0_LISMO]	7.1141e+08	7.01721e+08	2.86078e+08	5.24805e+08	1.2221e+08	5.47476e+08	0.98638	1.83448	4.47978	29.6562	29.19	9	10	26.4777	24.32	7	9	26.8733	23.51	8	9	26.3135	25.68	8	9	25.1675	24.32	8	8	24.8058	23.24	7	8	370	41.0393	4.81787
P58724	Blue-light photoreceptor OS=Listeria monocytogenes GN=lmo0799 - [PHOT_LISMO]	3.26459e+08	9.59106e+08	1.29165e+08	4.71305e+08	8.58226e+07	3.90829e+08	2.9379	3.64885	4.55391	17.6206	28.85	4	5	21.8371	36.36	5	6	10.7433	12.25	2	3	18.8806	36.36	5	5	8.08535	12.25	2	2	27.935	36.36	5	8	253	28.7984	4.83057
Q8Y4U2	Pseudouridine-5'-phosphate glycosidase OS=Listeria monocytogenes GN=psuG - [Q8Y4U2_LISMO]	2.61603e+08	1.19962e+09	1.53035e+08	6.76687e+08	7.53736e+07	4.09446e+08	4.58566	4.42177	5.43222	8.27377	11.22	3	3	24.6567	30.36	7	8	9.43177	7.92	2	3	19.2362	20.46	5	6	5.67395	6.6	2	2	23.2366	26.4	6	7	303	32.568	4.84326
Q8Y9I9	Tagatose 1,6-diphosphate aldolase OS=Listeria monocytogenes GN=lacD - [LACD_LISMO]	1.38802e+09	1.90405e+09	5.11642e+08	1.52333e+09	2.3964e+08	9.16092e+08	1.37177	2.97734	3.82278	46.9938	40.53	11	14	48.722	31.66	11	15	43.9433	28.11	8	13	47.0913	31.66	10	15	36.8857	27.81	7	11	41.8464	27.51	8	12	338	37.6602	5.04639
Q8Y6M0	S-adenosylmethionine synthase OS=Listeria monocytogenes GN=metK - [METK_LISMO]	2.95314e+08	1.0228e+09	1.24441e+08	8.11296e+08	3.11588e+07	1.13537e+09	3.46342	6.51952	36.4383	35.1089	33.08	8	10	47.3747	35.84	8	12	21.8682	13.53	3	5	46.6754	32.58	7	12	21.0111	17.04	4	6	47.3421	35.84	8	13	399	43.5244	5.14795
Q8Y581	Lmo2192 protein OS=Listeria monocytogenes GN=lmo2192 - [Q8Y581_LISMO]	2226107050	2.01656e+09	7.07752e+08	1.34643e+09	3.88635e+08	1.10852e+09	0.905867	1.90241	2.85235	30.65	28.57	8	10	30.0201	27.02	7	9	21.8514	18.32	5	7	24.9829	36.34	7	8	19.0362	18.32	5	6	32.7425	43.48	9	10	322	36.5979	7.35693
Q8Y5M2	UDP-N-acetylglucosamine--N-acetylmuramyl-(pentapeptide) pyrophosphoryl-undecaprenol N-acetylglucosamine transferase OS=Listeria monocytogenes GN=murG - [MURG_LISMO]	6.70208e+08	8.4105e+08	7.58646e+07	4.72405e+08	1.3104e+08	3.24516e+08	1.25491	6.22695	2.47646	21.0291	23.97	6	7	26.6634	26.17	7	8	8.21071	10.47	3	3	22.0471	27.82	6	7	13.1189	17.08	5	5	18.869	17.63	4	6	363	38.9906	7.12256
Q8Y6W5	Isocitrate dehydrogenase [NADP] OS=Listeria monocytogenes GN=citC - [Q8Y6W5_LISMO]	9.98457e+08	1729730115	5.43673e+08	1225073406	1.40871e+08	6.78792e+08	1.7324	2.25333	4.81855	19.8678	28.1	7	7	29.81	28.1	7	10	23.3132	25.24	6	8	35.0667	32.14	8	11	18.0614	20	5	6	29.6033	30.24	7	10	420	46.1189	5.2749
Q8Y5G0	Pta protein OS=Listeria monocytogenes GN=pta - [Q8Y5G0_LISMO]	1.33065e+09	1.85307e+09	2.93456e+08	9.29677e+08	1.56892e+08	3.81049e+08	1.39261	3.16803	2.42873	22.937	26.46	5	6	27.882	30.15	5	8	26.7843	39.69	7	8	30.1663	32.62	7	9	28.7215	31.08	5	7	23.2062	30.15	5	7	325	34.3921	5.2749
Q8Y6U8	Probable thiol peroxidase OS=Listeria monocytogenes GN=tpx - [TPX_LISMO]	5.02099e+08	4.06553e+08	0	0	5.41024e+07	0	0.809706			8.88151	23.03	2	3	7.43588	23.03	2	2									10.335	23.03	2	3					165	18.1223	5.36377
Q8Y685	Lmo1812 protein OS=Listeria monocytogenes GN=lmo1812 - [Q8Y685_LISMO]	0	9.51963e+08	0	4.63614e+08	0	363632347	>	>	>					20.3218	35.14	5	7					25.2762	31.42	4	7					23.7976	23.31	4	7	296	30.8375	4.88135
Q8Y742	Elongation factor 4 OS=Listeria monocytogenes GN=lepA - [LEPA_LISMO]	383794132	1579201160	1.96665e+08	1.48315e+09	9.15771e+07	8.42516e+08	4.11471	7.54151	9.20007	57.6523	32.07	11	16	66.8507	34.38	13	20	38.4891	16.45	6	10	83.6283	35.2	12	24	44.1741	24.34	9	12	64.1747	32.73	12	19	608	67.7803	5.16064
P66352	30S ribosomal protein S11 OS=Listeria monocytogenes GN=rpsK - [RS11_LISMO]	3136637051	8.4454e+09	6.24439e+08	2.94513e+09	2.24527e+08	2.87538e+09	2.6925	4.71644	12.8064	9.25233	30.23	2	3	18.5446	37.98	4	6	17.5449	30.23	2	6	23.1432	37.98	3	8	12.1921	30.23	3	4	21.7647	37.98	4	8	129	13.7774	11.3999
Q927Y2	Lmo2511 protein OS=Listeria monocytogenes GN=lmo2511 - [Q927Y2_LISMO]	0	875500020	0	0	0	0	>							13.5338	28.34	2	4																	187	21.62	5.38916
Q8Y8E2	Listeria epitope LemA OS=Listeria monocytogenes GN=lemA - [Q8Y8E2_LISMO]	0	5.80443e+08	0	3.63946e+08	0	2.56557e+08	>	>	>					10.449	29.73	3	4					8.77741	29.73	3	3					9.9689	27.57	3	3	185	21.1812	7.48877
Q8Y6S8	UDP-N-acetylmuramate--L-alanine ligase OS=Listeria monocytogenes GN=murC - [MURC_LISMO]	9.8567e+08	1.52251e+09	3.91552e+08	1.0047e+09	1.92619e+08	8.21915e+08	1.54465	2.56595	4.26704	39.1409	38.03	10	12	59.3411	40.27	12	18	34.8495	35.57	9	11	43.017	32.21	9	13	27.9151	28.64	8	9	43.5113	39.82	11	14	447	50.0424	5.59229
Q8Y436	Lmo2637 protein OS=Listeria monocytogenes GN=lmo2637 - [Q8Y436_LISMO]	1.24119e+08	569397516	1.78517e+07	2.17367e+08	0	1.84187e+08	4.5875	12.1762	>	7.49736	11.37	2	2	26.7604	30.77	5	7	8.86076	11.37	2	2	14.0103	26.76	4	4					16.4939	15.72	3	5	299	32.7213	6.65381
Q8YAG5	Lmo0161 protein OS=Listeria monocytogenes GN=lmo0161 - [Q8YAG5_LISMO]	0	1.86102e+09	0	9.84941e+08	0	5.9126e+08	>	>	>					21.1973	24.28	4	7					28.216	39.86	6	8					24.5765	30.43	5	8	276	31.7169	5.08447
Q8Y781	Lmo1415 protein OS=Listeria monocytogenes GN=lmo1415 - [Q8Y781_LISMO]	1.36362e+09	1.65645e+09	3.80409e+08	1.29597e+09	1.47696e+08	3.3184e+08	1.21475	3.40678	2.24677	22.6214	31.44	6	7	23.9378	24.74	5	7	23.8702	31.44	6	7	21.3985	27.06	5	6	11.2491	10.57	2	3	21.8784	26.29	6	7	388	43.217	5.21143
Q8Y4U5	Fructose-1-phosphate kinase OS=Listeria monocytogenes GN=fruB - [Q8Y4U5_LISMO]	5.26342e+08	7.31446e+08	2.89331e+08	5.52136e+08	1.47983e+08	3.73627e+08	1.38968	1.90832	2.52479	41.8623	37.79	8	12	20.4436	31.6	6	6	39.4925	37.79	7	11	27.138	31.27	6	8	28.3871	37.79	8	8	31.8859	31.6	7	9	307	33.1624	5.56689
Q8Y709	Aspartyl-tRNA synthetase OS=Listeria monocytogenes GN=aspS - [SYD_LISMO]	1.09508e+09	2.04641e+09	2.64836e+08	1.28498e+09	9.70754e+07	5.26293e+08	1.86873	4.85198	5.42149	70.1132	31.64	13	18	80.0012	32.15	15	21	36.0502	23.52	7	10	104.274	36.38	17	29	29.8958	19.97	8	9	77.6177	32.32	14	20	591	66.3412	5.07178
Q8Y6B8	Adenylosuccinate lyase OS=Listeria monocytogenes GN=purB - [Q8Y6B8_LISMO]	6.3796e+08	5.69111e+08	3.98222e+08	5.18155e+08	1.22886e+08	2.76615e+08	0.892079	1.30117	2.25099	23.6781	20.23	7	8	21.8912	18.84	7	7	19.5559	21.63	7	7	24.6901	25.35	9	9	25.4848	15.58	6	9	14.0523	13.95	5	5	430	49.0542	5.74463
Q8YA86	Lmo0273 protein OS=Listeria monocytogenes GN=lmo0273 - [Q8YA86_LISMO]	0	8.28989e+08	1.05195e+08	3.40181e+08	5.46926e+07	2.39724e+08	>	3.2338	4.38312					18.0164	37.13	4	5	15.4485	37.13	3	4	22.8238	42.51	4	6	8.13667	32.93	3	3	11.7765	32.93	3	3	167	18.6507	5.65576
Q8Y3X2	Lmo2707 protein OS=Listeria monocytogenes GN=lmo2707 - [Q8Y3X2_LISMO]	3.87902e+08	8.38369e+08	1.67955e+08	5.36952e+08	8.87459e+07	4.9632e+08	2.16129	3.19701	5.59259	9.31461	42.47	3	3	17.391	42.47	3	5	15.1451	42.47	3	4	24.5912	42.47	3	8	12.3702	42.47	3	3	14.6604	42.47	3	4	73	8.3313	4.97021
Q8Y7F9	NusA protein OS=Listeria monocytogenes GN=nusA - [Q8Y7F9_LISMO]	1.05305e+09	1.51558e+09	2.48513e+08	6.62067e+08	1.73644e+08	5.51011e+08	1.43923	2.66411	3.17323	26.8493	27.96	7	8	46.5111	33.33	11	14	31.9539	27.96	7	10	35.5899	30.65	8	10	31.9634	26.88	7	10	64.7136	38.71	10	18	372	41.6585	4.86865
Q8Y770	Lmo1431 protein OS=Listeria monocytogenes GN=lmo1431 - [Q8Y770_LISMO]	1.08924e+09	7.66952e+08	2.45514e+08	9.03728e+08	1.01494e+08	4.82907e+08	0.704115	3.68096	4.75798	48.4986	30.58	10	13	55.2861	30.96	10	14	37.5536	13.7	4	8	63.7601	34.71	12	17	18.086	10.13	3	5	49.2144	27.95	9	14	533	60.2606	5.09717
Q8Y5X0	Lmo1935 protein OS=Listeria monocytogenes GN=lmo1935 - [Q8Y5X0_LISMO]	1.08091e+08	3.50369e+08	0	235631531	0	1.07088e+08	3.24142	>	>	11.0726	15.95	3	4	24.0509	28.22	5	7					13.9799	19.63	3	4					26.4483	32.21	5	7	326	36.6116	5.0083
Q8Y6M4	Leucyl-tRNA synthetase OS=Listeria monocytogenes GN=leuS - [SYL_LISMO]	1.4552e+09	1.21353e+09	6.44046e+08	9.85538e+08	2.7493e+08	5.71441e+08	0.833925	1.53023	2.0785	50.2589	36.24	13	16	55.0431	29.39	11	16	72.9388	31.01	10	19	53.2904	17.43	7	15	41.2175	24.78	10	12	63.4398	30.88	12	19	803	91.8384	5.10986
Q8YAB8	Lysyl-tRNA synthetase OS=Listeria monocytogenes GN=lysS - [SYK_LISMO]	1.77115e+09	1.8459e+09	719913422	1.0398e+09	3.12773e+08	1.19049e+09	1.04221	1.44434	3.80623	53.0496	27.11	9	17	43.2927	24.5	9	14	27.3477	22.09	7	9	33.873	22.69	7	11	40.6038	26.71	9	13	29.2673	25.3	8	10	498	57.4021	5.26221
Q8Y6Z6	L-lactate dehydrogenase 2 OS=Listeria monocytogenes GN=ldh2 - [LDH2_LISMO]	1.13761e+09	1.16347e+09	3.58436e+08	6.24146e+08	1.57796e+08	3.96004e+08	1.02273	1.7413	2.5096	20.4624	27.01	6	6	20.5094	23.47	6	6	23.0448	30.23	6	7	19.5871	22.19	5	7	11.3815	15.76	4	4	19.3576	26.05	6	7	311	33.7195	5.56689
Q8Y565	Ferrochelatase OS=Listeria monocytogenes GN=hemH - [HEMH_LISMO]	1.72397e+09	1.57471e+09	3.3944e+08	8.63399e+08	2.19409e+08	4.98333e+08	0.913416	2.5436	2.27125	27.6961	24.27	5	8	20.3225	24.27	5	6	33.2319	24.27	5	10	26.5042	28.8	6	8	25.554	25.24	5	7	25.4707	24.27	5	7	309	35.3217	5.23682
Q8Y8J8	Lmo0903 protein OS=Listeria monocytogenes GN=lmo0903 - [Q8Y8J8_LISMO]	5.21849e+08	9.16034e+08	0	6.73477e+08	0	1.88745e+08	1.75536	>	>	14.0459	32.54	2	3	20.7406	42.06	3	5					19.8281	32.54	2	6					15.0619	32.54	2	4	126	13.9673	5.49072
Q8YAD4	Bifunctional protein glmU OS=Listeria monocytogenes GN=glmU - [GLMU_LISMO]	7.86506e+08	8.19608e+08	1.88484e+08	3.14458e+08	1.01038e+08	1.81346e+08	1.04209	1.66835	1.79482	51.0144	35.01	12	15	54.2057	35.01	11	15	27.0787	24.95	7	9	39.711	26.7	9	12	25.7432	19.91	7	8	30.2901	19.47	8	9	457	49.7797	6.354
Q8Y6X9	Valyl-tRNA synthetase OS=Listeria monocytogenes GN=valS - [SYV_LISMO]	1.9435e+09	2.24438e+09	6.50223e+08	1515787082	2.77568e+08	1.00956e+09	1.15481	2.33118	3.63716	61.4469	27.75	16	20	59.3539	27.86	14	18	66.9431	26.05	15	20	59.4256	23.56	13	18	56.9081	24.58	16	19	65.2535	32.05	17	21	883	102.029	5.08447
Q8Y725	Lmo1499 protein OS=Listeria monocytogenes GN=lmo1499 - [Q8Y725_LISMO]	0	734767576	0	4.15764e+08	0	3.12211e+08	>	>	>					42.2758	36.8	11	13					18.0948	19.1	5	6					36.7265	33.99	10	11	356	40.1098	8.33838
P66699	DNA-directed RNA polymerase subunit alpha OS=Listeria monocytogenes GN=rpoA - [RPOA_LISMO]	1.80886e+09	2.72114e+09	3.01942e+08	1.32064e+09	1.59971e+08	6.60967e+08	1.50434	4.37382	4.1318	41.9923	29.62	6	15	27.8603	35.35	7	8	29.7118	29.62	6	9	35.7914	41.4	7	10	36.737	31.53	7	13	31.2922	35.35	7	9	314	34.8841	4.89404
Q92CZ5	Lmo1027 protein OS=Listeria monocytogenes GN=lmo1027 - [Q92CZ5_LISMO]	8.04082e+08	1659483415	1.84493e+08	6.53443e+08	6.95801e+07	3.82772e+08	2.06382	3.54184	5.50117	24.6463	16.04	6	8	45.3949	26.13	10	13	23.5338	17.48	5	7	37.1832	15.32	7	11	6.15309	3.96	2	2	35.0952	23.6	9	11	555	61.5208	6.63916
Q8Y5L9	UDP-N-acetylmuramoyl-L-alanyl-D-glutamate--2,6-diaminopimelate ligase OS=Listeria monocytogenes GN=murE - [MURE_LISMO]	7.74817e+08	9.97897e+08	1.93068e+08	6.87999e+08	8.01548e+07	2.11583e+08	1.28791	3.5635	2.63968	34.6452	32.79	7	11	30.8693	32.18	8	9	23.3634	22.81	6	7	28.6272	33.4	7	9	27.9683	27.7	7	8	17.5619	20.98	4	5	491	53.7135	5.46533
Q8Y6T2	3-deoxy-D-arabino-heptulosonate 7-phosphate synthase OS=Listeria monocytogenes GN=aroA - [Q8Y6T2_LISMO]	2.20616e+09	3007652724	4.63282e+08	1.80493e+09	3.451e+08	9.34516e+08	1.3633	3.89595	2.70796	39.9337	38.23	9	11	57.9153	38.23	11	16	44.3067	25.76	8	13	75.6031	38.23	9	20	27.9258	31.58	8	8	48.2008	32.41	9	14	361	39.6601	5.5415
Q8Y5U9	Fur protein OS=Listeria monocytogenes GN=fur - [Q8Y5U9_LISMO]	1.16506e+08	1.30822e+08	0	1.38599e+08	0	0	1.12288	>		9.36307	26	2	3	4.34051	21.33	2	2					6.92256	30	3	3									150	17.317	6.41748
Q8Y576	Lmo2199 protein OS=Listeria monocytogenes GN=lmo2199 - [Q8Y576_LISMO]	0	5.06773e+09	0	2.41821e+08	8.79542e+06	1.80459e+08	>	>	20.5174					28.1464	40.58	4	9					13.7058	17.39	3	5	5.1751	16.67	2	2	10.5003	16.67	2	4	138	14.4943	4.88135
Q8Y788	DNA mismatch repair protein mutL OS=Listeria monocytogenes GN=mutL - [MUTL_LISMO]	2.42512e+08	9.28805e+08	1.48299e+08	5.70191e+08	4.7549e+07	3.70103e+08	3.82994	3.84488	7.7836	18.179	13.81	4	5	34.816	19.97	7	10	28.3433	17.3	5	7	32.4689	27.62	8	9	30.1869	15.47	5	8	47.2722	37.1	10	13	601	67.7523	5.63037
Q8Y7A2	Lmo1387 protein OS=Listeria monocytogenes GN=lmo1387 - [Q8Y7A2_LISMO]	1.15606e+08	5.73585e+08	0	3.70713e+08	0	3.15874e+08	4.96155	>	>	8.76562	12.9	3	3	25.8091	37.28	7	7					22.8285	29.39	5	6					22.7829	37.28	7	7	279	30.5135	4.83057
Q8Y708	Histidyl-tRNA synthetase OS=Listeria monocytogenes GN=hisS - [SYH_LISMO]	2.34579e+09	2.72658e+09	3.3733e+08	8.49744e+08	1.95812e+08	4.84247e+08	1.16233	2.51903	2.47302	45.7274	30.82	8	12	38.0329	37.18	9	10	61.338	35.29	9	16	66.8602	30.35	7	16	58.1759	36.47	9	15	59.5007	39.06	11	17	425	48.4146	5.36377
P60357	UPF0297 protein lmo1503 OS=Listeria monocytogenes GN=lmo1503 - [Y1503_LISMO]	0	0	0	0	0	3.14441e+07			>																					6.95325	38.89	2	2	90	10.5373	5.09717
P0A438	Phosphocarrier protein HPr OS=Listeria monocytogenes GN=ptsH - [PTHP_LISMO]	0	5.86686e+08	0	279098012	0	1.54391e+08	>	>	>					5.50949	27.27	2	2					7.77725	27.27	2	3					6.03739	27.27	2	2	88	9.39786	4.80518
Q8Y4A4	Homoserine dehydrogenase OS=Listeria monocytogenes GN=hom - [Q8Y4A4_LISMO]	5.25688e+08	3.1295e+09	2.1123e+08	2.06722e+09	7.5334e+07	1.4809e+09	5.95315	9.78657	19.6578	25.7889	22.66	7	8	84.7629	40.89	12	24	30.7915	16.36	5	8	85.6329	29.67	9	24	32.1722	19.16	6	9	58.4063	35.51	11	18	428	46.3128	5.26221
Q8Y6P3	CitB protein OS=Listeria monocytogenes GN=citB - [Q8Y6P3_LISMO]	1.02695e+09	1517297106	3.88294e+08	7.64975e+08	1.29403e+08	5.82857e+08	1.47748	1.97009	4.50419	59.8008	25.56	16	18	66.7375	28.22	16	22	32.1977	17	10	10	57.9943	23.11	14	20	26.1902	15.22	8	8	31.1734	19.44	9	11	900	98.2451	4.99561
Q8Y5W6	Cytidylate kinase OS=Listeria monocytogenes GN=cmk - [KCY_LISMO]	2.71014e+08	1.50362e+09	9.21003e+07	2.64231e+08	0	2.9148e+08	5.54813	2.86894	>	11.0216	17.41	2	4	16.4973	25.89	4	6	4.64005	8.48	2	2	4.79646	12.95	2	2					7.26325	17.86	3	3	224	24.8021	6.25244
Q8Y6C9	ATP-dependent DNA helicase OS=Listeria monocytogenes GN=pcrA - [Q8Y6C9_LISMO]	4.38917e+08	6.69886e+08	4.64243e+07	4.09739e+08	5.46127e+07	2.041e+08	1.52622	8.82598	3.73723	19.6659	14.77	6	7	26.583	19.84	8	9	12.2208	5.2	3	4	23.0629	21.75	8	8	8.85787	7.52	3	3	34.3115	23.39	8	11	731	83.1118	5.85889
Q8Y835	dTDP-glucose 4,6-dehydratase OS=Listeria monocytogenes GN=lmo1083 - [Q8Y835_LISMO]	2.15465e+09	2.56483e+09	5.68199e+08	2.0431e+09	9.35e+07	1.0695e+09	1.19037	3.59576	11.4384	28.9932	32.32	5	8	29.1115	32.32	5	8	27.4587	32.32	5	8	40.6632	33.84	6	11	22.7794	25.3	4	6	28.49	34.76	6	8	328	36.8786	5.33838
P21171	Protein p60 OS=Listeria monocytogenes GN=iap - [P60_LISMO]	0	1.04165e+09	1.08905e+07	2.91902e+08	7.30095e+06	2.36704e+08	>	26.8033	32.421					32.9702	26.03	10	11	5.28512	5.99	2	2	22.9863	13.43	7	8	4.98712	5.99	2	2	20.8566	12.19	6	7	484	50.5563	9.30518
Q8Y4A2	UDP-N-acetylglucosamine 1-carboxyvinyltransferase 2 OS=Listeria monocytogenes GN=murA2 - [MURA2_LISMO]	0	7.98683e+08	5.08701e+07	3.6122e+08	0	2.01997e+08	>	7.10083	>					31.2442	40.19	9	10	4.81917	9.93	2	2	15.6916	27.19	5	5					17.4999	22.93	5	5	423	45.076	6.46826
Q8Y8S1	Lmo0823 protein OS=Listeria monocytogenes GN=lmo0823 - [Q8Y8S1_LISMO]	1.87023e+09	1.11496e+09	1.31627e+08	1.26652e+09	0	577786867	0.596164	9.62204	>	7.72088	8.03	2	3	19.3297	17.52	4	7	5.41847	13.14	2	2	11.8003	15.33	2	3					9.59508	20.8	4	4	274	31.0569	5.26221
Q8Y791	Lmo1401 protein OS=Listeria monocytogenes GN=lmo1401 - [Q8Y791_LISMO]	6.46717e+08	8.53543e+08	2.23974e+08	5.63305e+08	5.28732e+07	2.55348e+08	1.31981	2.51505	4.82945	12.1398	22.47	4	4	11.5977	30.71	4	4	12.2079	27.72	4	4	14.5364	22.47	4	5	11.7293	19.1	3	4	12.78	16.85	3	5	267	29.8803	5.70654
Q8YAA3	50S ribosomal protein L7/L12 OS=Listeria monocytogenes GN=rplL - [RL7_LISMO]	527388106	1.33649e+09	1.69578e+08	6.24807e+08	6.27548e+07	4.22441e+08	2.53417	3.68448	6.73161	9.27767	30	3	3	9.6775	30	3	3	10.0104	30	3	3	9.11916	30	3	3	6.56531	20	2	2	9.65776	30	3	3	120	12.4617	4.55127
Q8Y766	Dihydrodipicolinate synthase OS=Listeria monocytogenes GN=dapA - [DAPA_LISMO]	1.21255e+08	6.09336e+08	7.81346e+07	3.21699e+08	3.54721e+07	2.43512e+08	5.02523	4.11725	6.86488	9.53958	18.09	3	3	24.8855	32.08	6	8	9.21968	13.99	2	3	20.0484	36.18	6	6	5.8227	13.99	2	2	23.2825	36.52	7	8	293	31.3886	6.16357
Q8Y837	Glucose-1-phosphate thymidylyltransferase OS=Listeria monocytogenes GN=lmo1081 - [Q8Y837_LISMO]	9.61851e+08	2.77737e+09	1.47152e+08	8.05022e+08	9.27462e+07	6.28868e+08	2.88752	5.47068	6.78053	19.7697	25.69	4	6	24.6988	32.64	6	8	11.7894	25.35	4	4	12.8127	25.69	4	4	8.66945	17.36	3	3	19.918	32.64	5	6	288	32.2097	4.97021
Q8Y6S1	Lmo1612 protein OS=Listeria monocytogenes GN=lmo1612 - [Q8Y6S1_LISMO]	0	0	0	0	0	2.24853e+08			>																					6.79788	39.81	2	2	103	11.4289	7.48877
Q8YA10	Lmo0356 protein OS=Listeria monocytogenes GN=lmo0356 - [Q8YA10_LISMO]	1466623846	1.55146e+09	1.27733e+08	3.39433e+08	1.07785e+08	1.34051e+08	1.05784	2.65736	1.24369	20.7342	24.26	5	6	21.2926	28.7	5	6	18.3888	21.01	4	5	22.1423	26.04	5	7	13.7783	13.61	4	5	14.0438	20.71	4	4	338	39.4166	5.35107
Q8Y6Z9	S-adenosylmethionine:tRNA ribosyltransferase-isomerase OS=Listeria monocytogenes GN=queA - [QUEA_LISMO]	2.6527e+08	189847118	8.0696e+07	1.41657e+08	3.80891e+07	1.18314e+08	0.715676	1.75544	3.10625	5.39922	7.89	2	2	11.5652	15.2	3	4	8.70517	15.2	3	3	9.53768	15.79	3	3	8.30688	15.2	3	3	4.86283	8.77	2	2	342	38.2357	5.24951
Q8Y3Y7	Lmo2692 protein OS=Listeria monocytogenes GN=lmo2692 - [Q8Y3Y7_LISMO]	2919129447	5.55271e+09	1301015757	3.36143e+09	5.26856e+08	1.87051e+09	1.90218	2.5837	3.55032	9.80675	39.45	2	3	16.5432	39.45	2	5	20.1741	39.45	2	6	21.5657	39.45	2	7	17.54	39.45	2	5	18.1667	39.45	2	6	109	11.806	5.12256
Q8Y441	50S ribosomal protein L23 OS=Listeria monocytogenes GN=rplW - [RL23_LISMO]	1.96013e+08	6.48579e+08	0	1.56789e+08	0	2.08671e+08	3.30885	>	>	9.82047	39.36	3	3	15.0111	39.36	4	4					15.7208	28.72	3	4					14.8249	39.36	4	4	94	10.9088	9.5835
Q8Y4A7	Thymidine kinase OS=Listeria monocytogenes GN=tdk - [KITH_LISMO]	3.97546e+08	7.20049e+08	3.88716e+08	7.21742e+08	107563462	0	1.81124	1.85673		13.1391	14.14	2	4	15.7371	34.03	4	5	9.55251	14.14	2	3	6.2858	14.14	2	2	5.85152	14.14	2	2					191	21.8632	7.32764
Q8Y6D0	DNA ligase OS=Listeria monocytogenes GN=ligA - [DNLJ_LISMO]	4.58966e+08	2.32225e+09	9.82511e+07	1.12459e+09	5.54228e+07	7.25264e+08	5.05974	11.4461	13.086	22.6575	15.05	7	8	32.3241	19.52	10	11	18.3787	13.26	6	6	37.6373	24.59	12	13	15.3188	8.49	4	5	28.2169	19.23	9	9	671	74.8084	5.0083
Q8Y8E9	Lmo0955 protein OS=Listeria monocytogenes GN=lmo0955 - [Q8Y8E9_LISMO]	0	452079199	0	2.47402e+08	0	1.46492e+08	>	>	>					24.0938	32.74	6	7					6.98749	12.1	2	2					27.265	27.05	5	8	281	33.6568	5.2876
Q8Y4F3	Lmo2491 protein OS=Listeria monocytogenes GN=lmo2491 - [Q8Y4F3_LISMO]	3.94211e+08	7.0733e+08	2.15523e+08	5.41683e+08	0	2.83074e+08	1.79429	2.51334	>	8.58926	15.81	2	2	13.9336	34.42	4	4	6.58872	13.49	2	2	7.22102	14.88	2	2					15.002	34.42	4	5	215	24.9045	4.85596
Q8Y6E8	Lmo1739 protein OS=Listeria monocytogenes GN=lmo1739 - [Q8Y6E8_LISMO]	0	2.5531e+08	0	1.17622e+08	0	8.60021e+07	>	>	>					12.933	26.51	4	4					5.35537	19.07	2	2					12.0609	32.56	4	4	215	23.5857	6.15088
Q8YAN9	Lmo0078 protein OS=Listeria monocytogenes GN=lmo0078 - [Q8YAN9_LISMO]	1.0982e+09	1.02318e+09	2.78985e+08	5.73163e+08	1.97357e+08	3.60383e+08	0.931691	2.05446	1.82604	23.4875	30.5	6	6	25.3326	36.16	7	7	25.807	25.79	5	7	16.6838	21.07	4	4	23.3275	25.79	5	6	19.1375	26.73	5	5	318	33.8299	5.56689
Q8Y478	Lmo2577 protein OS=Listeria monocytogenes GN=lmo2577 - [Q8Y478_LISMO]	0	8.13512e+08	6.15577e+07	4.94903e+08	3.34695e+07	1.99391e+08	>	8.03966	5.95738					11.8654	26.91	4	4	7.47966	13.45	2	2	7.0962	20	2	2	13.6545	16.73	3	4	13.5244	16.73	3	4	275	30.2799	4.80518
Q8Y5X8	Histidinol-phosphate aminotransferase OS=Listeria monocytogenes GN=hisC - [HIS8_LISMO]	3.46274e+08	5.05257e+08	1.30342e+08	3.25604e+08	0	1.54738e+08	1.45912	2.49807	>	9.2727	13.33	3	3	12.7868	19.17	4	4	5.55637	10.56	2	2	7.85977	23.33	3	3					9.02924	22.22	3	3	360	40.0871	5.31299
Q8YAV7	DNA gyrase subunit B OS=Listeria monocytogenes GN=gyrB - [Q8YAV7_LISMO]	3.71411e+09	2.68547e+09	4.40811e+08	1.31132e+09	5.33561e+08	6.70303e+08	0.723045	2.97479	1.25628	50.9671	28.17	10	15	54.5924	26.63	9	17	45.0029	26.63	9	14	49.0064	23.53	10	16	36.3519	18.11	7	12	38.9871	21.98	8	12	646	72.7688	5.50342
Q8Y7E4	Lmo1339 protein OS=Listeria monocytogenes GN=lmo1339 - [Q8Y7E4_LISMO]	5.87713e+08	1.43721e+09	3.31452e+08	6.90869e+08	9.62701e+07	2.91407e+08	2.44542	2.08437	3.02697	9.05861	13.35	3	3	15.8991	24.22	5	5	20.6616	24.84	5	7	24.4686	24.84	6	8	21.5551	24.84	5	7	15.4268	16.77	5	5	322	33.6913	4.83057
Q8Y4H9	Lmo2462 protein OS=Listeria monocytogenes GN=lmo2462 - [Q8Y4H9_LISMO]	3.12835e+08	2.75973e+08	8.50717e+07	8.72435e+07	6.18959e+07	1.74725e+08	0.882166	1.02553	2.82288	18.4742	32.14	6	6	12.7877	22.4	4	4	6.30107	10.71	2	2	8.21455	13.96	3	3	5.46901	6.82	2	2	15.9664	23.38	4	5	308	34.7367	5.87158
Q8Y4P6	Lmo2389 protein OS=Listeria monocytogenes GN=lmo2389 - [Q8Y4P6_LISMO]	1.98323e+09	3.37806e+09	5.45426e+08	1.10364e+09	9.05302e+07	8.44026e+08	1.70331	2.02344	9.32314	43.4465	25.56	11	14	54.4221	29.03	12	17	83.189	32.75	12	27	68.0326	32.26	10	20	32.6459	25.81	8	10	60.575	26.55	10	18	403	44.0292	6.16357
Q8Y4D2	Lmo2518 protein OS=Listeria monocytogenes GN=lmo2518 - [Q8Y4D2_LISMO]	0	3.26927e+08	0	3.09707e+08	0	1.25079e+08	>	>	>					18.1532	22.44	5	5					18.7311	23.86	5	6					16.9678	24.15	5	5	352	39.0938	5.84619
Q8Y4A5	ThrC protein OS=Listeria monocytogenes GN=thrC - [Q8Y4A5_LISMO]	3.73256e+08	5.37495e+08	2.41019e+08	3.63156e+08	7.98534e+07	1.96304e+08	1.44002	1.50675	2.4583	34.5305	32.48	5	9	34.5442	24.22	4	8	27.226	18.23	4	7	20.8491	16.52	3	5	32.2188	26.78	5	8	26.5348	21.94	3	6	351	36.9399	5.43994
Q8Y5Y2	UPF0302 protein lmo1921 OS=Listeria monocytogenes GN=lmo1921 - [Y1921_LISMO]	1.19929e+08	0	2.91709e+08	0	0	8.90351e+07			>	5.42037	7.18	2	2					4.9862	7.18	2	2									10.8648	17.68	3	3	181	21.1975	5.05908
Q8Y435	Lmo2638 protein OS=Listeria monocytogenes GN=lmo2638 - [Q8Y435_LISMO]	2.58232e+10	1.79885e+10	4.20204e+09	8.12455e+09	2.74825e+09	4.01668e+09	0.696603	1.93348	1.46154	679.338	36.15	19	153	320.811	34.08	17	77	846.146	34.87	17	198	517.638	32.32	15	125	730.278	33.28	17	173	266.06	32.17	15	64	628	70.4019	7.03467
Q8Y7G2	Prolyl-tRNA synthetase OS=Listeria monocytogenes GN=proS - [SYP_LISMO]	7.99283e+08	1.30674e+09	4.34009e+08	1.16412e+09	9.8852e+07	671126557	1.6349	2.68224	6.78921	41.7363	19.54	8	12	40.1308	26.41	9	12	35.4824	20.42	7	11	35.4855	25.7	9	11	26.6748	18.49	7	9	41.1727	25.18	9	13	568	63.3133	4.90674
Q8Y9B9	Lmo0613 protein OS=Listeria monocytogenes GN=lmo0613 - [Q8Y9B9_LISMO]	0	4.07777e+08	0	2.38704e+08	0	2.00665e+08	>	>	>					10.4189	15.97	4	4					15.6321	18.53	4	5					14.2878	17.89	4	5	313	33.9187	5.2749
Q92D14	Lmo1008 protein OS=Listeria monocytogenes GN=lmo1008 - [Q92D14_LISMO]	4.8084e+08	5.40392e+08	6.30822e+07	4.13471e+08	6.12262e+07	1.84432e+08	1.12385	6.55448	3.01231	13.0256	37.66	3	4	6.51677	37.66	2	2	8.72088	24.68	2	3	8.97201	37.66	2	3	6.1409	24.68	2	2	12.1945	37.66	3	4	77	8.95021	4.31006
Q8Y5M4	FtsA protein OS=Listeria monocytogenes GN=ftsA - [Q8Y5M4_LISMO]	7.89319e+08	3.50086e+09	3.07642e+08	2.15545e+09	1.39334e+08	1.63152e+09	4.43529	7.00637	11.7095	26.2683	28.87	5	8	66.2817	35.68	8	17	18.0043	19.25	3	5	37.5838	28.87	5	10	13.4543	15.96	3	4	65.4456	35.68	7	18	426	45.9015	4.7417
Q8Y7C7	Acetyl-CoA carboxylase subunit (Biotin carboxylase subunit) OS=Listeria monocytogenes GN=lmo1357 - [Q8Y7C7_LISMO]	3.3274e+09	6.80784e+09	1.48296e+09	4.00444e+09	4.00928e+08	2.69473e+09	2.046	2.7003	6.72123	35.4843	34.58	11	11	47.96	37.44	13	14	22.7701	25.77	7	7	57.1392	35.46	12	16	19.044	20.26	6	6	46.8663	30.18	9	12	454	49.8974	5.47803
Q8Y729	5'-methylthioadenosine/S-adenosylhomocysteine nucleosidase OS=Listeria monocytogenes GN=mtnN - [MTNN_LISMO]	6.00372e+08	3.63997e+08	0	0	0	2.42271e+08	0.606285		>	8.78062	11.59	2	3	9.09691	18.45	3	3													7.07594	15.45	3	3	233	25.365	4.58936
Q8Y7D4	Probable glycine dehydrogenase [decarboxylating] subunit 1 OS=Listeria monocytogenes GN=gcvPA - [GCSPA_LISMO]	2.32573e+08	4.09993e+08	1.13476e+08	4.35383e+08	5.70081e+07	4.24076e+08	1.76286	3.83678	7.43887	11.2683	11.16	4	4	19.8	14.96	5	6	16.9766	12.28	4	5	18.4386	11.38	4	6	13.364	12.28	4	4	11.5956	12.72	4	4	448	49.4473	5.73193
Q8Y8G9	Putative tRNA (cytidine/uridine-2'-O-)-methyltransferase lmo0935 OS=Listeria monocytogenes GN=lmo0935 - [Q8Y8G9_LISMO]	6.01722e+08	5.51712e+08	1.00154e+08	3.05208e+08	8.13805e+07	2.34399e+08	0.916888	3.04737	2.88028	13.1359	20.71	4	4	8.8724	20.71	3	3	9.55448	15.98	3	3	13.9346	27.22	5	5	9.78227	15.98	3	3	13.1918	22.49	4	4	169	19.5935	4.91943
Q8Y626	Thymidylate synthase OS=Listeria monocytogenes GN=thyA - [TYSY_LISMO]	7.51932e+08	1.40144e+09	2.22136e+08	7.34746e+08	1.29196e+08	4.82812e+08	1.86379	3.30764	3.73705	24.531	22.29	4	7	18.4708	22.29	4	5	18.6971	22.29	4	5	34.4237	22.29	4	9	23.5367	22.29	4	6	19.4619	19.11	3	5	314	36.1402	5.35107
Q8Y641	Peptide methionine sulfoxide reductase MsrB OS=Listeria monocytogenes GN=msrB - [MSRB_LISMO]	2.86079e+08	3.59662e+08	0	1.37147e+08	0	1.37183e+08	1.25722	>	>	7.35368	24.14	2	2	6.99421	24.14	2	2					6.05765	24.14	2	2					7.10378	24.14	2	2	145	16.5111	5.0083
Q8Y4T0	Lmo2352 protein OS=Listeria monocytogenes GN=lmo2352 - [Q8Y4T0_LISMO]	0	8.81814e+08	0	0	0	2.27232e+08	>		>					7.44936	12.37	3	3													8.06427	9.36	3	3	299	34.0776	5.87158
Q8Y7D3	Probable glycine dehydrogenase [decarboxylating] subunit 2 OS=Listeria monocytogenes GN=gcvPB - [GCSPB_LISMO]	8.78789e+08	1143515545	3.76493e+08	8.22e+08	1.63035e+08	4.5883e+08	1.30124	2.18331	2.8143	38.412	31.15	10	12	36.1306	27.87	9	11	25.2395	24.39	6	8	30.8361	29.92	9	10	26.8747	30.33	8	9	27.9135	22.34	6	9	488	54.1635	5.63037
Q8Y6V8	Acetyl-coenzyme A carboxylase carboxyl transferase subunit beta OS=Listeria monocytogenes GN=accD - [ACCD_LISMO]	2.44714e+08	2.9657e+08	8.4703e+07	0	0	0	1.21191			11.9678	19.73	3	4	8.05242	19.73	3	3	5.33591	12.93	2	2													294	31.9971	6.44287
Q8Y5Z6	Dihydrodipicolinate reductase OS=Listeria monocytogenes GN=dapB - [DAPB_LISMO]	6.83397e+08	7.88604e+08	1.51311e+08	7.62879e+08	1.3366e+08	4.86429e+08	1.15395	5.0418	3.63931	7.81991	12.17	2	2	15.8215	18.63	3	4	13.6337	12.17	2	3	8.18476	12.17	2	2	17.0525	12.17	2	4	7.8333	12.17	2	2	263	28.8819	5.30029
Q8Y5Q0	AlsS protein OS=Listeria monocytogenes GN=alsS - [Q8Y5Q0_LISMO]	1.15289e+09	1.80633e+09	2.39308e+08	1.08634e+09	1.49341e+08	7.02517e+08	1.56678	4.53954	4.70411	48.3528	26.73	8	14	62.548	26.73	8	17	47.705	24.07	7	15	47.3996	30.09	8	14	35.8537	23.54	6	11	50.1981	23.54	6	14	565	61.6733	5.61768
Q8Y4R7	Glucose-6-phosphate isomerase OS=Listeria monocytogenes GN=pgi - [G6PI_LISMO]	545563904	5.75191e+08	0	3.85061e+08	0	2.04475e+08	1.05431	>	>	4.78949	7.11	2	2	26.8123	20.89	5	7					25.8735	19.56	4	7					13.8222	11.78	3	4	450	49.8655	5.42725
Q8Y651	Manganese transport system ATP-binding protein MntB OS=Listeria monocytogenes GN=mntB - [MNTB_LISMO]	0	6.67139e+08	0	1.92995e+08	0	1.6464e+08	>	>	>					26.0897	25	5	7					14.4993	12.08	3	4					14.6832	14.17	4	4	240	26.4783	9.12939
Q8Y621	Lmo1881 protein OS=Listeria monocytogenes GN=lmo1881 - [Q8Y621_LISMO]	1.02144e+08	785022449	7.90035e+07	5.41504e+08	3.30126e+07	3.57321e+08	7.68543	6.85418	10.8238	8.27491	11.72	2	2	23.5852	28.97	6	7	8.446	11.72	2	2	22.5431	23.1	4	6	9.37095	11.72	2	3	19.0688	36.55	6	6	290	32.4003	4.93213
Q8Y7J4	Lmo1283 protein OS=Listeria monocytogenes GN=lmo1283 - [Q8Y7J4_LISMO]	4.43258e+08	7.57827e+08	1.82324e+08	4.52926e+08	1.02921e+08	3.86679e+08	1.70968	2.48418	3.75705	12.9328	13.45	4	4	20.9658	23.79	6	7	12.8672	17.59	4	4	21.6454	23.1	6	7	8.58067	8.62	2	3	17.2609	27.24	6	6	290	33.0516	4.85596
Q8Y557	Foldase protein prsA 2 OS=Listeria monocytogenes GN=prsA2 - [PRSA2_LISMO]	0	3.51544e+08	0	2.6781e+08	0	3.54136e+08	>	>	>					18.3319	24.57	4	4					7.66244	8.87	2	2					12.4684	19.45	4	4	293	32.6774	5.93506
Q8Y765	Aspartokinase OS=Listeria monocytogenes GN=lmo1436 - [Q8Y765_LISMO]	7.68578e+08	2.79403e+09	9.44081e+07	1.55403e+09	2.69221e+08	1.05319e+09	3.63533	16.4607	3.912	16.8474	19.11	4	5	45.6852	28.04	8	12	14.6147	13.15	3	4	40.0153	26.55	6	10	13.8746	13.15	3	4	28.2908	26.55	6	8	403	43.0546	6.30322
Q8Y4H1	NADPH dehydrogenase OS=Listeria monocytogenes GN=namA - [NAMA_LISMO]	1.11244e+09	1.73027e+09	0	8.46041e+08	0	6.81867e+08	1.55538	>	>	6.42455	8.28	2	2	4.76967	8.28	2	2					8.48819	19.82	3	3					5.36557	8.58	2	2	338	36.9824	6.87354
Q8Y493	Arginyl-tRNA synthetase OS=Listeria monocytogenes GN=argS - [SYR_LISMO]	9.91861e+08	6.65087e+08	3.28594e+08	9.85222e+08	1.80699e+08	2.55381e+08	0.670545	2.99829	1.41329	33.8299	22.3	9	10	20.5413	17.63	6	6	55.4676	25.54	9	14	28.2184	22.12	8	8	44.2932	19.96	8	12	29.1237	16.37	6	8	556	62.797	5.19873
Q8Y5Y0	3-phosphoshikimate 1-carboxyvinyltransferase OS=Listeria monocytogenes GN=aroA - [AROA_LISMO]	1.0214e+09	753883369	1.43708e+08	2.02081e+08	125291408	153579083	0.738089	1.40619	1.22578	35.0441	26.4	8	10	25.8156	22.66	7	7	16.9019	17.52	5	5	29.5719	21.96	7	8	25.6041	26.64	7	7	36.0218	32.01	9	11	428	46.0481	6.18896
P33380	L-lactate dehydrogenase 1 OS=Listeria monocytogenes GN=ldh1 - [LDH1_LISMO]	1082300902	1505306300	2.19561e+08	9.57766e+08	9.14052e+07	5.44536e+08	1.39084	4.36219	5.95738	33.2729	32.91	11	11	29.2693	20.45	8	9	24.2123	20.13	8	8	32.065	30.67	8	10	32.1535	22.68	8	10	17.0347	27.16	6	6	313	34.1703	5.42725
Q926X1	Lmo2779 protein OS=Listeria monocytogenes GN=lmo2779 - [Q926X1_LISMO]	941842464	3078186303	2.65654e+08	1.88841e+09	1.62532e+08	7.49417e+08	3.26826	7.10855	4.6109	17.7812	17.21	5	6	34.7761	36.07	8	10	19.3083	16.67	5	6	44.8173	36.07	8	13	10.1541	8.2	3	3	39.1878	36.07	8	12	366	40.658	4.89404
Q8YAR8	Single-stranded DNA-binding protein 1 OS=Listeria monocytogenes GN=ssb1 - [SSB1_LISMO]	8.18807e+08	550537260	0	1.18099e+08	0	1.09374e+08	0.672365	>	>	7.87042	19.1	2	3	8.77257	17.42	2	3					6.01236	14.04	2	2					5.76434	17.42	2	2	178	19.4813	5.13525
Q8Y8P1	D-alanine--D-alanine ligase OS=Listeria monocytogenes GN=ddl - [DDL_LISMO]	4.63732e+08	1.1273e+09	3.4381e+08	7.44488e+08	1.05985e+08	248134172	2.43094	2.16541	2.34121	30.3988	27.57	7	9	27.3975	29.73	8	9	31.4709	29.73	7	11	15.0091	23.51	4	4	36.3563	27.57	6	11	11.0069	21.08	3	3	370	40.6438	4.56396
P13128	Listeriolysin O OS=Listeria monocytogenes GN=hly - [TACY_LISMO]	0	3.55523e+08	0	2.11545e+08	0	1.07555e+08	>	>	>					25.3505	20.04	7	8					18.3231	14.18	4	5					12.7124	12.85	4	4	529	58.652	7.91357
Q8Y6V9	Acetyl-coenzyme A carboxylase carboxyl transferase subunit alpha OS=Listeria monocytogenes GN=accA - [ACCA_LISMO]	4.70404e+08	2.76759e+08	1.90774e+08	3.73427e+08	1.06161e+08	2.75392e+08	0.588344	1.95744	2.59409	17.5959	19.5	4	5	11.0988	16.04	3	3	16.4879	21.38	4	5	17.3529	24.84	5	6	15.179	20.75	4	5	13.6289	21.38	4	4	318	35.2472	5.90967
P0A2X5	Adenine phosphoribosyltransferase OS=Listeria monocytogenes GN=apt - [APT_LISMO]	2.25371e+08	3.58722e+08	1.10712e+08	3.32485e+08	5.82207e+07	2.22789e+08	1.5917	3.00316	3.82663	13.9483	19.08	3	4	10.2257	19.08	3	3	6.21037	8.67	2	2	7.45301	8.67	2	3	6.66765	18.5	2	2	9.366	19.08	3	3	173	19.1702	5.2876
Q8Y9H0	Lmo0558 protein OS=Listeria monocytogenes GN=lmo0558 - [Q8Y9H0_LISMO]	4.06718e+09	3.92156e+09	9.24196e+08	2366727289	5.19838e+08	1.29615e+09	0.964196	2.56085	2.49337	49.7225	30.35	9	18	37.693	24.57	7	12	39.7899	30.06	8	14	43.8205	30.06	9	16	33.5764	27.46	7	12	28.1506	24.57	7	10	346	37.3618	5.5542
Q8Y4M3	Lmo2414 protein OS=Listeria monocytogenes GN=lmo2414 - [Q8Y4M3_LISMO]	475325890	1.14816e+09	1.65734e+08	6.73612e+08	8.63615e+07	4.78635e+08	2.41553	4.06441	5.54222	20.9995	21.25	5	6	45.3726	28.64	7	12	21.327	23.33	6	7	37.2499	31.18	8	11	16.3359	20.79	5	5	41.0857	35.8	9	13	433	48.0718	5.93506
Q8YAB1	Cysteinyl-tRNA synthetase OS=Listeria monocytogenes GN=cysS - [SYC_LISMO]	2.95906e+08	6.07716e+08	8.61179e+07	3.24918e+08	3.52042e+07	2.20956e+08	2.05375	3.77294	6.2764	16.7498	12.74	4	4	23.0139	18.05	5	6	12.9884	12.74	3	4	19.1973	16.14	5	6	17.423	12.74	3	5	30.9972	21.44	6	9	471	54.3202	5.07178
Q8Y5E6	Phosphoglucosamine mutase OS=Listeria monocytogenes GN=glmM - [GLMM_LISMO]	4.25666e+08	9.41135e+08	1.34826e+08	6.00639e+08	0	402429366	2.21097	4.45492	>	38.5418	23.33	4	8	34.5428	20.44	3	7	32.4811	20.44	3	7	56.938	25.11	5	14					52.0031	27.56	6	12	450	48.4573	4.81787
Q8Y862	Dihydrolipoyl dehydrogenase OS=Listeria monocytogenes GN=PdhD - [Q8Y862_LISMO]	7.98287e+08	1438132734	3.02446e+08	8.90305e+08	1.48872e+08	4.79637e+08	1.80152	2.94368	3.2218	59.1438	34.05	11	16	52.907	32.98	11	15	32.1866	24.63	7	10	30.2722	29.12	8	10	32.7343	22.48	6	9	40.3483	27.19	8	11	467	49.4569	5.33838
Q8Y834	Lmo1084 protein OS=Listeria monocytogenes GN=lmo1084 - [Q8Y834_LISMO]	0	1.01751e+09	0	3.95925e+08	7.12933e+07	3.02829e+08	>	>	4.24765					19.2102	26.09	6	7					16.432	19.2	4	5	4.9323	9.78	2	2	14.0821	19.2	4	5	276	31.1509	5.16064
Q8Y6J9	Glutamate-1-semialdehyde 2,1-aminomutase 2 OS=Listeria monocytogenes GN=hemL2 - [GSA2_LISMO]	6.66219e+08	6.90964e+08	2.3144e+08	9.26829e+08	3.36338e+07	5.09267e+08	1.03714	4.00462	15.1415	17.6375	21.76	6	6	17.0197	21.99	6	6	5.82662	7.18	2	2	17.0919	23.61	5	6	6.57551	6.02	2	2	14.4813	16.67	4	5	432	46.0723	5.22412
Q8Y734	Lmo1489 protein OS=Listeria monocytogenes GN=lmo1489 - [Q8Y734_LISMO]	0	3.11651e+08	5.7394e+07	1.33957e+08	4.06897e+07	8.33383e+07	>	2.33399	2.04814					7.33003	35.42	3	3	5.38334	23.96	2	2	5.61778	23.96	2	2	4.99007	23.96	2	2	7.72615	35.42	3	3	96	10.785	9.75928
Q8Y4G9	UPF0042 nucleotide-binding protein lmo2474 OS=Listeria monocytogenes GN=lmo2474 - [Y2474_LISMO]	9.27952e+08	1.05012e+09	2.12356e+08	4.62053e+08	9.64415e+07	2.47794e+08	1.13166	2.17585	2.56937	11.2203	17.18	4	4	11.6957	17.18	4	4	7.81551	7.22	2	3	13.002	23.37	5	5	12.8116	14.78	4	5	16.6292	21.65	5	6	291	33.5313	6.20166
Q8YAB3	Glutamyl-tRNA synthetase OS=Listeria monocytogenes GN=gltX - [SYE_LISMO]	1.85824e+09	2.17364e+09	5.86511e+08	1.80993e+09	3.70796e+08	6.35133e+08	1.16973	3.08593	1.71289	27.5369	25.05	7	7	44.1742	29.33	9	12	54.0349	30.96	10	15	37.5353	26.07	8	10	56.6613	28.92	9	16	48.4589	28.92	9	14	491	56.0005	5.22412
Q48793	Ribose-phosphate pyrophosphokinase 1 OS=Listeria monocytogenes GN=prs1 - [KPRS1_LISMO]	9.72522e+08	4.99864e+09	5.0842e+07	1.44657e+09	1.66732e+08	7.5696e+08	5.13988	28.4522	4.54	12.3312	14.15	4	4	18.8138	23.9	5	7	6.97707	9.12	2	2	18.9252	23.9	5	6	6.25629	8.18	2	2	24.8359	24.53	5	8	318	35.0473	6.18896
P0A491	50S ribosomal protein L35 OS=Listeria monocytogenes GN=rpmI - [RL35_LISMO]	2.90742e+09	0	0	0	0	0				4.82059	34.85	2	2																					66	7.71526	12.5571
Q48746	Lmo1453 protein OS=Listeria monocytogenes GN=lmo1453 - [Q48746_LISMO]	1.67269e+08	6.35837e+08	0	5.0921e+08	0	1.47131e+08	3.80128	>	>	23.6048	34.62	4	7	20.443	29.91	3	6					29.8373	34.62	5	9					11.9541	16.24	2	3	234	26.1838	7.44482
Q8Y7F1	Polyribonucleotide nucleotidyltransferase OS=Listeria monocytogenes GN=pnp - [PNP_LISMO]	9.65976e+08	1.28028e+09	4.28375e+08	1024160050	1.09507e+08	567274204	1.32538	2.39081	5.18024	28.9638	15.63	8	9	41.6025	18.67	10	13	36.2492	17.15	8	11	39.4079	16.04	8	13	25.7929	10.93	5	7	17.3041	12.17	6	6	723	79.5524	5.32568
Q8Y4I0	Lmo2460 protein OS=Listeria monocytogenes GN=lmo2460 - [Q8Y4I0_LISMO]	0	1.64621e+08	0	1.00352e+08	0	3.13953e+07	>	>	>					7.67829	14.66	2	2					20.0388	15.52	2	4					10.9387	19.25	3	3	348	38.3131	7.95752
Q8Y7I0	Glutamine synthetase OS=Listeria monocytogenes GN=glnA - [Q8Y7I0_LISMO]	3593247830	1.48432e+09	6.69002e+08	1.13677e+09	4.34578e+08	2.78688e+08	0.413085	1.69921	0.641283	51.3369	25.45	9	16	28.0375	24.77	8	9	53.5936	25.45	10	17	39.6527	22.3	7	12	32.8927	22.3	7	10	39.9694	29.05	8	12	444	50.4293	5.08447
Q926W7	Partition protein, ParA homolog OS=Listeria monocytogenes GN=parA - [Q926W7_LISMO]	1.32557e+08	8.98522e+08	0	6.42782e+08	0	2.09958e+08	6.7784	>	>	16.9514	13.04	2	5	45.6701	34.39	6	14					35.1322	22.53	3	11					42.0306	26.48	5	13	253	27.4537	5.22412
Q9RLT9	DNA-directed RNA polymerase subunit beta OS=Listeria monocytogenes GN=rpoB - [RPOB_LISMO]	3.57687e+09	2.02844e+09	9.92078e+08	1.73267e+09	5.13562e+08	9.50792e+08	0.567099	1.7465	1.85137	92.6449	26.35	21	29	70.9378	22.64	18	22	70.4809	25.25	16	23	61.2053	24.92	18	21	63.5433	21.79	15	19	61.9258	27.96	18	22	1184	132.521	5.17334
Q8YAD3	50S ribosomal protein L25 OS=Listeria monocytogenes GN=rplY - [RL25_LISMO]	0	2.22778e+08	0	0	0	0	>							5.29954	23.67	2	2																	207	22.6406	4.50049
Q8Y7B3	Lmo1373 protein OS=Listeria monocytogenes GN=lmo1373 - [Q8Y7B3_LISMO]	3.61042e+08	4.0462e+09	1.35699e+08	2.83853e+09	1.68654e+08	1.46271e+09	11.207	20.9179	8.67287	11.0513	13.15	3	4	22.1779	23.55	6	7	14.5279	17.13	4	5	24.5077	26.3	7	9	21.1821	25.08	6	7	25.3709	28.13	7	8	327	35.7143	4.93213
Q8Y7N7	Glutamate racemase OS=Listeria monocytogenes GN=murI - [MURI_LISMO]	3.16101e+08	2.22999e+09	1.72231e+08	1.58306e+09	7.40278e+07	1.38618e+09	7.05468	9.19147	18.7251	9.49223	19.55	3	3	15.888	26.32	5	5	8.91198	19.55	3	3	19.1993	30.08	6	7	8.31606	19.55	3	3	28.714	34.21	7	10	266	29.1412	6.15088
Q8Y789	DNA mismatch repair protein mutS OS=Listeria monocytogenes GN=mutS - [MUTS_LISMO]	1.14447e+09	1.63865e+09	2.26209e+08	8.45007e+08	1.52311e+08	5.18349e+08	1.4318	3.73551	3.40323	45.4114	15.58	8	14	76.6772	27.21	15	22	32.5505	17.21	9	11	61.9392	25.93	12	17	35.9204	17.44	9	11	48.0468	21.74	12	14	860	98.1422	5.41455
Q9RE04	P45 OS=Listeria monocytogenes GN=spl - [Q9RE04_LISMO]	0	5.44781e+08	0	3.63604e+08	0	2.25618e+08	>	>	>					47.923	29.93	8	11					38.5636	29.93	8	10					33.9039	29.93	8	8	401	42.6857	8.54346
Q8Y730	Lmo1493 protein OS=Listeria monocytogenes GN=lmo1493 - [Q8Y730_LISMO]	3.65139e+09	2.77047e+09	6.70732e+08	2.06436e+09	7.03919e+08	1.02173e+09	0.758743	3.07778	1.45148	73.2339	33.06	13	21	49.9468	24.09	9	15	58.9017	27.41	11	15	73.0966	29.73	11	22	50.2827	29.07	11	14	38.8245	26.25	10	12	602	68.7511	4.89404
Q8Y5S9	Lmo1976 protein OS=Listeria monocytogenes GN=lmo1976 - [Q8Y5S9_LISMO]	0	5.39257e+08	0	4.53665e+08	0	1.70811e+08	>	>	>					19.4654	33.84	4	6					18.5117	22.05	3	5					17.9434	22.05	3	5	263	29.0164	9.24658
Q8Y840	Lmo1078 protein OS=Listeria monocytogenes GN=lmo1078 - [Q8Y840_LISMO]	4.36342e+08	1.06159e+09	117227694	4.87882e+08	3.70832e+07	3.49759e+08	2.43292	4.16183	9.43173	11.5817	17.24	3	3	17.4397	27.59	5	5	11.1801	17.24	3	3	27.3466	27.59	5	7	8.78165	13.79	2	2	23.0935	30.34	5	6	290	32.4531	5.14795
Q8Y6Q0	Lmo1634 protein OS=Listeria monocytogenes GN=lmo1634 - [Q8Y6Q0_LISMO]	1.22259e+09	8.07683e+08	3.89791e+08	7.65588e+08	2.48604e+08	4.03987e+08	0.660634	1.9641	1.62502	49.5472	21.48	10	14	65.8893	25.87	14	20	63.8729	22.17	11	18	47.9055	22.06	10	15	58.7742	21.25	10	17	47.0657	17.55	9	14	866	94.6219	6.93213
Q8Y6Z4	Lmo1536 protein OS=Listeria monocytogenes GN=lmo1536 - [Q8Y6Z4_LISMO]	1.75627e+08	337261513	0	2.9338e+08	0	1.29369e+08	1.92033	>	>	6.67846	11.7	2	2	16.5313	27.66	5	5					13.0276	23.4	4	4					6.25033	11.7	2	2	282	31.0652	6.06201
Q9S5A6	Heat-inducible transcription repressor hrcA OS=Listeria monocytogenes GN=hrcA - [HRCA_LISMO]	0	4.46158e+08	0	1.5487e+08	0	1.13428e+08	>	>	>					8.35778	15.65	3	3					5.93153	11.01	2	2					18.6059	19.42	4	6	345	39.6561	5.57959
Q9LAT7	Lmo2196 protein OS=Listeria monocytogenes GN=oppA - [Q9LAT7_LISMO]	172056852	1.97863e+09	9.25034e+07	1.17633e+09	0	8.04814e+08	11.4999	12.7166	>	6.38026	4.48	2	2	51.6782	30.47	12	15	10.8308	10.93	4	4	37.7256	24.91	9	10					41.4158	25.63	11	12	558	62.5486	5.49072
Q8Y700	Queuine tRNA-ribosyltransferase OS=Listeria monocytogenes GN=tgt - [TGT_LISMO]	515751514	4.82907e+08	1.13254e+08	4.37786e+08	1.49487e+08	1.4493e+08	0.936317	3.86552	0.969517	21.4434	27.97	5	6	19.2754	18.21	3	5	15.3823	18.73	3	4	16.6075	18.21	3	4	9.48421	13.46	2	3	16.6979	18.21	3	4	379	42.8935	7.54736
Q8Y860	Lmo1057 protein OS=Listeria monocytogenes GN=lmo1057 - [Q8Y860_LISMO]	5.60901e+08	960851408	0	3.08946e+08	0	4.03047e+08	1.71305	>	>	28.8864	23.34	5	9	40.0227	28.71	6	11					38.5435	23.34	5	11					48.1897	28.71	6	13	317	35.2417	5.60498
P60384	Redox-sensing transcriptional repressor rex OS=Listeria monocytogenes GN=rex - [REX_LISMO]	0	4.80851e+08	1.7801e+07	2.0989e+08	0	1.38895e+08	>	11.7909	>					9.37333	21.4	3	3	5.49931	10.7	2	2	6.87265	16.74	2	2					11.2725	21.4	3	4	215	24.1846	6.12549
Q8Y8J5	Lmo0906 protein OS=Listeria monocytogenes GN=lmo0906 - [Q8Y8J5_LISMO]	6.97698e+08	6.58949e+08	2.68545e+08	0	1.433e+08	2.18725e+08	0.944461		1.52634	21.7618	23.39	5	7	28.1948	23.83	5	8	19.8828	21.38	4	6					21.124	18.04	4	6	19.3786	22.94	4	6	449	48.964	5.99854
Q8YAC6	ATP-dependent zinc metalloprotease FtsH 1 OS=Listeria monocytogenes GN=ftsH - [Q8YAC6_LISMO]	4.70207e+08	7.68208e+08	7.75805e+07	5.97341e+08	4.73507e+07	3.19178e+08	1.63377	7.69963	6.74072	16.777	12.45	5	5	36.7973	24.17	9	11	11.8612	8.68	4	4	39.7946	24.75	10	11	5.62571	4.34	2	2	40.2254	22	8	11	691	76.1909	5.10986
Q927L7	50S ribosomal protein L14 OS=Listeria monocytogenes GN=rplN - [RL14_LISMO]	1.87185e+09	2.82232e+09	1.88908e+08	9.14924e+08	3.17914e+08	0	1.50777	4.84323		10.5384	30.33	3	4	10.9739	30.33	3	4	8.28041	19.67	2	3	4.97916	19.67	2	2	8.55774	19.67	2	3					122	13.2181	9.99365
Q8Y6H5	Methionine aminopeptidase OS=Listeria monocytogenes GN=lmo1709 - [Q8Y6H5_LISMO]	0	1081011632	0	553562016	0	1.64385e+08	>	>	>					5.26864	15.48	2	2					10.9926	15.48	2	4					14.4864	15.48	3	5	252	27.865	5.61768
Q8Y6W6	DNA polymerase I OS=Listeria monocytogenes GN=polA - [Q8Y6W6_LISMO]	6.06819e+08	7.2255e+08	1.77342e+08	1.0435e+09	8.0681e+07	2.72579e+08	1.19072	5.88413	3.37847	46.7324	22.17	11	14	45.5789	23.66	13	14	21.5633	14.06	7	7	37.0415	18.97	10	12	16.4059	10.17	5	5	37.998	22.74	11	12	875	98.3868	5.21143
Q8Y8K9	RsbR protein OS=Listeria monocytogenes GN=RsbR - [Q8Y8K9_LISMO]	3.61649e+08	1.21551e+09	8.13609e+07	1203021166	1.12161e+08	4.68695e+08	3.36103	14.7862	4.17877	15.3438	19.06	4	5	20.2687	24.1	5	6	13.5588	14.75	3	4	16.2775	18.35	4	5	10.1794	10.07	2	3	26.222	24.1	5	7	278	31.6004	4.93213
Q8Y9T0	Lmo0443 protein OS=Listeria monocytogenes GN=lmo0443 - [Q8Y9T0_LISMO]	0	7.13884e+08	0	2.78829e+08	0	1.84757e+08	>	>	>					36.6542	24.92	5	10					24.6644	21.04	4	6					22.1486	24.92	5	6	309	34.1239	9.05615
Q8Y688	Phosphate acyltransferase OS=Listeria monocytogenes GN=plsX - [PLSX_LISMO]	4.2319e+08	1409913142	1.01916e+08	6.70725e+08	5.33284e+07	2.14576e+08	3.33163	6.58114	4.02367	17.2532	20.77	5	6	27.1816	27.6	7	9	8.03916	11.57	3	3	24.6204	26.41	7	8	8.29984	8.01	2	3	19.9947	24.04	6	7	337	36.384	7.41553
Q8Y606	AspB protein OS=Listeria monocytogenes GN=aspB - [Q8Y606_LISMO]	1.46105e+08	4.97069e+08	3.54517e+07	1.28787e+08	1.77194e+07	1.76916e+08	3.40214	3.63274	9.98431	21.2617	21.37	5	5	23.5329	29.01	6	6	31.0093	18.07	4	7	13.7823	7.89	3	3	21.0058	16.54	3	5	15.3608	16.79	4	4	393	43.3313	5.52881
Q8Y8T3	Lmo0811 protein OS=Listeria monocytogenes GN=lmo0811 - [Q8Y8T3_LISMO]	3.50434e+08	7.39239e+08	7.55324e+07	428425241	0	278792684	2.1095	5.67207	>	14.7618	23.61	4	5	6.40176	11.16	2	2	7.61658	18.45	3	3	6.116	11.16	2	2					8.15895	14.59	3	3	233	27.2323	4.97021
Q8Y449	Adenylate kinase OS=Listeria monocytogenes GN=adk - [KAD_LISMO]	9.06825e+08	1.27785e+09	1.49914e+08	3.85509e+08	0	2.75227e+08	1.40915	2.57154	>	16.8791	32.09	5	6	16.5083	32.09	5	6	6.33026	16.74	2	2	11.606	26.98	4	4					11.4835	26.51	4	4	215	24.2483	5.22412
Q8Y823	Lmo1095 protein OS=Listeria monocytogenes GN=lmo1095 - [Q8Y823_LISMO]	3.03988e+08	5.61817e+08	1.62681e+08	2.20949e+08	5.00263e+07	2.15359e+08	1.84815	1.35817	4.30492	9.97683	32.09	3	3	8.80073	32.09	3	3	9.48708	22.39	2	3	6.68027	23.13	2	2	5.83087	22.39	2	2	5.60312	22.39	2	2	134	14.6225	7.92822
Q8Y745	HemN protein OS=Listeria monocytogenes GN=hemN - [Q8Y745_LISMO]	0	1.71579e+08	0	1.14333e+08	0	9.77352e+07	>	>	>					10.0479	15.32	3	3					7.80379	10.13	2	2					10.9705	10.13	2	3	385	43.809	5.80811
Q8Y714	tRNA-specific 2-thiouridylase mnmA OS=Listeria monocytogenes GN=mnmA - [MNMA_LISMO]	633148536	1.53794e+09	0	8.62756e+08	1.31008e+08	5.26031e+08	2.42904	>	4.01525	12.1778	13.75	3	4	21.0015	24.26	5	6					25.9655	28.84	6	8	14.1634	9.43	2	3	22.8597	27.22	6	7	371	41.4776	5.07178
Q8Y3W1	Lmo2720 protein OS=Listeria monocytogenes GN=lmo2720 - [Q8Y3W1_LISMO]	9.37869e+08	1.25579e+09	6.29314e+08	735765662	2.7309e+08	4.81612e+08	1.33899	1.16916	1.76356	27.8977	19.81	7	9	31.4193	24.95	9	11	22.4087	21.71	8	8	23.0715	17.52	7	9	18.4688	12.38	5	7	27.5228	14.67	6	9	525	59.1201	5.79541
Q48754	CD4+ T-cell-stimulating antigen OS=Listeria monocytogenes GN=tcsA - [TCSA_LISMO]	0	5.30034e+08	0	1.91826e+08	0	1.1037e+08	>	>	>					23.0036	31.65	7	7					9.33139	8.68	2	3					11.1837	13.73	3	3	357	38.3913	5.23682
Q8Y824	Lmo1094 protein OS=Listeria monocytogenes GN=lmo1094 - [Q8Y824_LISMO]	1242813061	1507517896	0	0	0	0	1.21299			5.96178	31.37	2	2	5.8956	31.37	2	2																	102	11.4029	5.08447
Q9S5A2	Ribosomal protein L11 methyltransferase OS=Listeria monocytogenes GN=prmA - [PRMA_LISMO]	5.4269e+08	8.67488e+08	2.52381e+08	7.58917e+08	1.15545e+08	4.32104e+08	1.5985	3.00703	3.73972	22.4786	26.11	7	7	21.5753	28.66	6	7	26.6188	25.8	6	9	27.644	31.21	7	9	21.9512	31.21	7	7	15.0583	25.16	5	5	314	34.79	4.52588
Q8Y481	Lmo2574 protein OS=Listeria monocytogenes GN=lmo2574 - [Q8Y481_LISMO]	0	1.19777e+10	0	0	0	0	>							7.37228	31.11	2	3																	90	9.92444	9.08545
P65770	Probable inorganic polyphosphate/ATP-NAD kinase 2 OS=Listeria monocytogenes GN=ppnK2 - [PPNK2_LISMO]	5.32814e+08	1.01741e+09	1.29715e+08	4.67069e+08	8.56518e+07	2.27003e+08	1.9095	3.60074	2.65031	15.5055	26.22	4	5	18.7652	26.22	4	6	15.458	20.6	3	5	22.3891	25.47	4	6	16.4078	20.6	3	5	14.1479	20.6	3	4	267	30.4796	7.03467
Q8YA56	Lmo0305 protein OS=Listeria monocytogenes GN=lmo0305 - [Q8YA56_LISMO]	3.38533e+08	3.83885e+08	1.57272e+08	4.20819e+08	5.76162e+07	1.54646e+08	1.13397	2.67573	2.68407	16.1154	20.67	3	4	12.5647	20.11	3	3	17.5846	20.11	3	4	14.4515	28.49	4	4	21.3711	22.63	4	6	14.5866	20.11	3	4	358	39.8733	4.97021
Q48757	Lmo0229 protein OS=Listeria monocytogenes GN=lmo0229 - [Q48757_LISMO]	0	396302160	0	2.65162e+08	0	1.86518e+08	>	>	>					6.34711	16.45	2	2					9.83534	16.45	2	3					10.207	30.92	3	3	152	17.4734	6.22705
Q8Y6T4	Tyrosyl-tRNA synthetase OS=Listeria monocytogenes GN=tyrS - [SYY_LISMO]	1.75306e+09	2.13794e+09	6.26756e+08	1.50261e+09	1.80886e+08	7.90352e+08	1.21955	2.39743	4.36934	23.491	24.11	8	8	27.203	24.11	8	9	19.1062	20.76	7	7	24.143	20.76	7	8	30.9514	20.53	7	11	28.9315	24.82	9	11	419	47.5642	5.23682
Q8Y693	Lmo1803 protein OS=Listeria monocytogenes GN=lmo1803 - [Q8Y693_LISMO]	2.99077e+08	1.06102e+09	76511112	5.24854e+08	0	4.00785e+08	3.54766	6.85984	>	12.003	18.6	3	4	32.8196	30.79	6	10	6.10807	9.45	2	2	22.7402	21.34	4	6					24.8084	30.79	7	8	328	36.3839	4.98291
P66548	30S ribosomal protein S3 OS=Listeria monocytogenes GN=rpsC - [RS3_LISMO]	0	2.26054e+09	0	0	0	8.62449e+08	>		>					17.1007	24.77	4	6													7.76387	18.81	3	3	218	24.527	9.74463
Q8Y4M5	Lmo2412 protein OS=Listeria monocytogenes GN=lmo2412 - [Q8Y4M5_LISMO]	0	0	0	4.01551e+08	0	0		>														11.044	30.61	2	3									147	16.373	6.39209
Q8Y7J1	DNA topoisomerase IV subunit B OS=Listeria monocytogenes GN=parE - [Q8Y7J1_LISMO]	1.83287e+08	9.15963e+08	0	4.60611e+08	0	3.40825e+08	4.99743	>	>	9.31667	8.09	3	4	21.476	16.34	6	7					5.92549	5.19	2	2					9.95496	10.69	4	4	655	72.9695	6.41748
Q8Y4F6	UvrABC system protein A OS=Listeria monocytogenes GN=uvrA - [UVRA_LISMO]	1.11824e+09	1.0816e+09	3.16057e+08	4.33262e+08	1.9428e+08	2.35339e+08	0.967229	1.37083	1.21134	40.0286	21.65	13	15	36.6947	14.96	10	12	27.7341	13.6	8	9	38.1798	13.91	10	12	21.7034	10.88	7	7	33.0219	10.25	7	10	956	106.415	6.60986
P66623	30S ribosomal protein S8 OS=Listeria monocytogenes GN=rpsH - [RS8_LISMO]	0	6.42022e+08	0	0	0	0	>							9.03	30.3	3	3																	132	14.635	9.49561
Q8Y7I4	GlpD protein OS=Listeria monocytogenes GN=glpD - [Q8Y7I4_LISMO]	2.01943e+08	1.45696e+09	0	6.26721e+08	0	3.87786e+08	7.21471	>	>	7.9595	4.84	2	2	39.951	25.09	8	11					33.4831	21.68	7	9					30.7733	20.97	7	9	558	63.1993	6.78564
Q8Y3N3	Ribosomal RNA small subunit methyltransferase G OS=Listeria monocytogenes GN=rsmG - [RSMG_LISMO]	1.68535e+08	3.19412e+08	0	1.60061e+08	3.49878e+07	0	1.89523	>		11.5937	22.69	4	4	7.40565	12.18	3	3					9.44892	12.18	3	4	8.50918	13.87	3	3					238	27.1408	6.44287
Q8Y7B9	Arginine repressor OS=Listeria monocytogenes GN=argR - [ARGR_LISMO]	0	4.96454e+08	0	3.54198e+08	0	0	>	>						12.1377	30.2	3	4					7.88799	30.2	3	3									149	16.7676	5.56689
Q8YAA4	50S ribosomal protein L1 OS=Listeria monocytogenes GN=rplA - [RL1_LISMO]	0	7.00031e+08	0	3.37669e+08	0	0	>	>						9.74769	18.78	3	3					21.4634	30.13	5	7									229	24.517	9.31982
Q8Y8W9	Lmo0773 protein OS=Listeria monocytogenes GN=lmo0773 - [Q8Y8W9_LISMO]	0	4.16476e+08	0	2.15248e+08	0	1.00397e+08	>	>	>					10.1274	17.33	3	3					16.3737	30.09	5	5					7.27547	11.25	2	2	329	35.2071	5.12256
Q8Y838	Lmo1080 protein OS=Listeria monocytogenes GN=lmo1080 - [Q8Y838_LISMO]	666195677	5.53977e+08	2.17043e+08	199334488	1.12027e+08	84749994	0.831552	0.918412	0.756515	21.3297	12.52	5	7	23.9411	22.63	8	8	13.4818	11.08	5	5	13.1689	8.67	4	5	10.8393	7.38	4	4	8.37888	6.26	3	3	623	71.4426	5.73193
Q8Y754	Glycyl-tRNA synthetase beta subunit OS=Listeria monocytogenes GN=glyS - [SYGB_LISMO]	9.17521e+08	993683215	4.00805e+08	1.00151e+09	1.6916e+08	6.66716e+08	1.08301	2.49874	3.94134	43.6943	22.97	10	14	44.2665	19.62	9	13	30.173	17.73	8	10	34.6361	20.49	9	10	17.7634	13.08	6	6	49.8201	21.8	10	14	688	78.4586	4.94482
Q8YAC4	33 kDa chaperonin OS=Listeria monocytogenes GN=hslO - [HSLO_LISMO]	0	3.05164e+08	0	1.36471e+08	0	1.92194e+08	>	>	>					11.0821	14.29	3	3					5.68591	10.88	2	2					5.56945	8.16	2	2	294	31.8948	4.66553
Q8Y4U6	FruA protein OS=Listeria monocytogenes GN=fruA - [Q8Y4U6_LISMO]	7.6264e+08	8.1497e+08	2.3989e+08	5.89115e+08	167730237	2.84482e+08	1.06862	2.45577	1.69607	17.6944	9.97	5	6	31.8926	13.61	7	11	22.1653	11.71	5	8	26.1961	16.93	7	9	16.0467	10.6	5	6	23.3733	16.93	6	8	632	66.1731	5.99854
Q8Y8D4	D-alanine--poly(phosphoribitol) ligase subunit 1 OS=Listeria monocytogenes GN=dltA - [DLTA_LISMO]	3.10166e+08	3.8913e+08	4.21276e+07	213606428	0	8.33452e+07	1.25459	5.07047	>	16.8296	17.84	5	5	31.2842	25.49	9	9	4.79038	4.71	2	2	16.8704	15.69	5	6					13.1033	13.14	4	4	510	57.7254	5.17334
Q8Y4F5	UvrABC system protein B OS=Listeria monocytogenes GN=uvrB - [UVRB_LISMO]	1.22321e+09	1.56296e+09	4.39952e+08	1.13865e+09	1.9634e+08	4.15222e+08	1.27776	2.58813	2.11481	39.5109	21.88	8	11	46.0337	23.25	9	14	27.3253	19.6	7	8	73.1155	24.62	11	20	21.881	13.37	7	7	49.7531	21.12	9	15	658	75.5149	5.45264
Q8Y4C0	ATP synthase subunit alpha 2 OS=Listeria monocytogenes GN=atpA2 - [ATPA2_LISMO]	4.92705e+08	2.9199e+08	1.10049e+08	2.40252e+08	9.8675e+07	8.09512e+07	0.592628	2.18313	0.820382	19.7533	19.44	5	6	19.0522	16.87	4	6	17.5694	16.87	4	5	13.1972	18.85	5	5	22.7011	18.85	5	7	14.6742	18.85	5	5	504	55.0528	5.49072
Q8Y826	Nicotinate phosphoribosyltransferase OS=Listeria monocytogenes GN=lmo1092 - [Q8Y826_LISMO]	5.30835e+08	6.68924e+08	2.03522e+08	3.44572e+08	6.36891e+07	2.55361e+08	1.26014	1.69304	4.0095	15.5933	15.32	4	4	17.8941	20.97	6	6	14.5769	15.32	4	4	11.5795	12.5	3	3	10.2587	9.07	3	3	12.3776	15.32	4	4	496	56.2306	5.35107
Q8Y7Q1	Phenylalanyl-tRNA synthetase beta chain OS=Listeria monocytogenes GN=pheT - [SYFB_LISMO]	7.06204e+08	9.63431e+08	2.10102e+08	3.66742e+08	4.30828e+08	2.05497e+08	1.36424	1.74554	0.476982	32.1352	17.33	8	9	25.0939	14.96	7	7	28.3029	11.1	5	7	21.2421	9.85	4	5	32.0597	15.71	7	10	19.3663	12.72	5	5	802	87.956	5.16064
Q8Y798	Lmo1392 protein OS=Listeria monocytogenes GN=lmo1392 - [Q8Y798_LISMO]	7.72791e+08	5.43995e+08	1.18697e+08	3.29255e+08	7.31371e+07	1.8795e+08	0.703936	2.77391	2.56983	29.8727	23.72	8	10	20.9504	21.16	7	7	11.4275	8.84	3	4	15.8996	8.84	3	5	15.3935	12.33	4	5	16.0805	14.19	5	6	430	49.0002	5.03369
Q8Y3T4	Seryl-tRNA synthetase OS=Listeria monocytogenes GN=serS - [SYS_LISMO]	1.45012e+09	1.02209e+09	326580849	744234044	6.47342e+07	5.31274e+08	0.704826	2.27887	8.20702	20.0834	18.97	6	7	12.1679	14.05	4	4	22.5037	18.97	6	8	18.6412	19.44	6	7	14.5195	16.39	5	5	20.6429	18.97	6	8	427	49.047	5.36377
Q8Y6M1	AnsB protein OS=Listeria monocytogenes GN=ansB - [Q8Y6M1_LISMO]	2.21457e+09	2.04236e+09	6.15862e+08	9.50304e+08	1.38538e+08	6.41146e+08	0.922238	1.54305	4.62796	32.5956	19	8	9	30.0918	13.53	6	8	46.8181	19	8	13	39.2423	20.61	8	11	33.8311	11.43	5	9	37.9385	23.51	10	11	621	71.8529	5.71924
Q8Y756	Probable endonuclease 4 OS=Listeria monocytogenes GN=nfo - [END4_LISMO]	3.67891e+08	4.19308e+08	7.14712e+07	9.65728e+07	3.84228e+07	8.14847e+07	1.13976	1.35121	2.12074	14.9527	17.85	4	6	13.7582	17.85	4	5	8.50386	13.13	3	3	13.1208	16.84	4	5	5.30699	9.43	2	2	5.85453	9.43	2	2	297	32.6786	6.18896
Q8Y5X3	Lmo1930 protein OS=Listeria monocytogenes GN=lmo1930 - [Q8Y5X3_LISMO]	0	4.27996e+08	0	3.30606e+08	0	2.16203e+08	>	>	>					15.1883	29.28	4	5					12.7323	22.12	3	4					12.2938	22.12	4	4	321	35.7317	6.81494
Q8Y8G8	Lmo0936 protein OS=Listeria monocytogenes GN=lmo0936 - [Q8Y8G8_LISMO]	4.92334e+08	4.55573e+08	7.13415e+07	402586253	4.63498e+07	1.81196e+08	0.925335	5.64309	3.90932	17.016	22.36	5	5	10.3661	15.45	3	3	8.81291	9.35	2	3	14.9083	20.33	4	5	9.30538	16.26	3	3	16.0545	20.33	4	5	246	27.3762	6.02393
Q8Y3M5	tRNA uridine 5-carboxymethylaminomethyl modification enzyme MnmG OS=Listeria monocytogenes GN=mnmG - [MNMG_LISMO]	2.9271e+08	2.06462e+08	1.44199e+08	3.90893e+08	6.03817e+07	2.09693e+08	0.705347	2.71079	3.47278	19.9889	15.1	5	5	17.5809	11.76	4	5	10.2085	9.7	3	3	22.5634	16.22	5	6	5.60881	6.52	2	2	12.542	13.2	4	4	629	70.0932	5.50342
Q8YA81	Lmo0278 protein OS=Listeria monocytogenes GN=lmo0278 - [Q8YA81_LISMO]	172139048	7.99588e+08	0	4.21694e+08	0	2.88316e+08	4.64501	>	>	6.94096	7.65	2	2	20.5748	18.03	4	6					13.1996	21.58	4	4					13.2496	19.67	4	4	366	41.122	6.21436
Q8Y6B7	Phosphoribosylaminoimidazole carboxylase II OS=Listeria monocytogenes GN=purK - [Q8Y6B7_LISMO]	1.10008e+09	5.85227e+08	3.02827e+08	526586858	1.81871e+08	1.54978e+08	0.531986	1.7389	0.852128	14.8015	20.05	4	5	19.5673	16.04	4	6	13.7398	11.23	3	4	18.4316	16.04	4	5	10.014	6.68	2	3	15.2573	13.64	3	4	374	41.3814	5.12256
Q8Y8T1	Lmo0813 protein OS=Listeria monocytogenes GN=lmo0813 - [Q8Y8T1_LISMO]	2.48252e+08	347338965	5.47401e+07	1.4486e+08	4.26823e+07	0	1.39914	2.64632		10.4846	10.34	3	3	11.3773	12.76	4	4	5.53114	7.24	2	2	9.33251	12.07	3	3	7.79283	11.03	3	3					290	31.3511	5.90967
Q93Q55	Gamma-glutamyl phosphate reductase OS=Listeria monocytogenes GN=proA - [PROA_LISMO]	5.94403e+08	1.0618e+09	1.00778e+08	3.54174e+08	6.61129e+07	3.39416e+08	1.78632	3.51438	5.13388	20.5618	20.96	5	5	28.5253	28.92	7	8	22.112	24.82	6	6	36.3651	28.92	7	10	18.0306	20.48	5	5	22.7053	21.69	5	6	415	45.4806	5.47803
Q8Y4B3	Uracil phosphoribosyltransferase OS=Listeria monocytogenes GN=upp - [UPP_LISMO]	827611632	1.52455e+09	4.96371e+08	6.7279e+08	2.98845e+08	1.0297e+08	1.84211	1.35542	0.34456	17.4033	28.71	3	5	12.211	19.62	2	4	5.42169	19.62	2	2	19.0736	19.62	4	6	11.3598	19.62	2	4	5.74033	19.62	2	2	209	22.9301	6.06201
Q8Y5B3	Lmo2154 protein OS=Listeria monocytogenes GN=lmo2154 - [Q8Y5B3_LISMO]	0	6.32526e+08	0	0	0	338266322	>		>					17.5719	16.62	4	6													9.53242	15.47	3	3	349	40.1919	4.80518
Q8Y888	Lmo1029 protein OS=Listeria monocytogenes GN=lmo1029 - [Q8Y888_LISMO]	5.2639e+08	442005563	1.14883e+08	4.96952e+08	0	0	0.839692	4.32574		11.1023	16.02	2	3	13.5035	20.31	2	3	4.86714	16.02	2	2	10.173	16.02	2	3									256	28.7323	5.42725
Q8Y960	Motility gene repressor mogR OS=Listeria monocytogenes GN=mogR - [MOGR_LISMO]	2.13875e+08	4.11161e+08	0	3.36463e+08	0	2.12777e+08	1.92244	>	>	5.15448	6.54	2	2	11.2765	13.4	3	4					13.8238	22.88	5	5					7.057	12.75	3	3	306	35.2322	5.64307
Q8Y5S7	Glucose-6-phosphate 1-dehydrogenase OS=Listeria monocytogenes GN=lmo1978 - [Q8Y5S7_LISMO]	9.27915e+08	1.3339e+09	2.3655e+08	7.4333e+08	1.14871e+08	3.90438e+08	1.43752	3.14239	3.39893	31.9254	25.87	8	9	32.9121	25.87	8	10	26.9971	23.01	7	9	25.6454	16.9	5	8	28.2819	19.14	6	9	27.6366	20.77	6	9	491	56.1642	5.43994
Q8Y8A3	Lmo1009 protein OS=Listeria monocytogenes GN=lmo1009 - [Q8Y8A3_LISMO]	2.16489e+08	593361086	0	4.43702e+08	0	3.11895e+08	2.74083	>	>	8.67065	28	2	2	9.72592	28	2	2					8.80937	28	2	2					10.996	28	2	3	150	17.2409	5.33838
Q8Y6V6	Lmo1575 protein OS=Listeria monocytogenes GN=lmo1575 - [Q8Y6V6_LISMO]	0	319211923	5.80224e+07	1.5766e+08	4.8555e+07	1.10273e+08	>	2.71723	2.27109					5.07667	9.97	2	2	16.2493	12.54	2	4	6.91616	12.54	2	2	8.18609	12.54	2	2	6.81478	12.54	2	2	311	34.7776	4.95752
Q8Y993	Lmo0640 protein OS=Listeria monocytogenes GN=lmo0640 - [Q8Y993_LISMO]	2.59568e+08	6.29917e+09	7.09614e+07	1.62033e+08	0	9.88309e+07	24.2679	2.2834	>	16.8003	16.07	3	5	20.8437	15.74	2	5	6.17196	18.03	2	2	10.076	15.74	2	2					15.7555	16.07	3	4	305	34.0231	5.17334
Q8Y9F4	Lmo0574 protein OS=Listeria monocytogenes GN=lmo0574 - [Q8Y9F4_LISMO]	1.58076e+09	6.2491e+08	1.68584e+08	3.13876e+08	0	1.60852e+08	0.395323	1.86184	>	28.3891	25.43	7	9	15.6203	13.36	3	5	19.5511	9.7	3	6	10.2548	7.11	2	3					11.4113	15.73	3	3	464	54.0672	5.24951
Q8Y7B7	Lmo1369 protein OS=Listeria monocytogenes GN=lmo1369 - [Q8Y7B7_LISMO]	0	3.19287e+08	0	0	0	0	>							11.8141	23.26	3	3																	288	30.7555	6.81494
Q8Y668	Orotate phosphoribosyltransferase OS=Listeria monocytogenes GN=pyrE - [PYRE_LISMO]	2.42222e+08	8.96096e+08	1.02471e+08	5.70635e+08	7.55851e+07	6.00553e+08	3.69948	5.56877	7.94539	9.57012	27.75	3	3	12.2388	27.75	3	4	7.76266	27.75	3	3	11.6118	27.75	3	4	7.02333	15.79	2	2	7.48316	15.79	2	2	209	22.8201	5.49072
Q8Y4L5	Lmo2422 protein OS=Listeria monocytogenes GN=cesR - [Q8Y4L5_LISMO]	0	466752881	0	1.1209e+08	0	9.96037e+07	>	>	>					15.747	27.71	4	5					5.29685	11.26	2	2					8.89581	11.26	2	3	231	26.0266	5.13525
Q8Y6S6	PheT protein OS=Listeria monocytogenes GN=pheT - [Q8Y6S6_LISMO]	918467642	1.40478e+09	2.28748e+08	8.50503e+08	1.39321e+08	5.09487e+08	1.52948	3.71808	3.65692	11.4426	21.95	4	4	8.49383	17.56	3	3	6.11782	12.68	2	2	7.69469	17.07	3	3	6.40155	12.68	2	2	6.651	12.68	2	2	205	22.4095	4.88135
P0A4Q6	2',3'-cyclic-nucleotide 2'-phosphodiesterase OS=Listeria monocytogenes GN=lmo1399 - [CNPD_LISMO]	0	386935081	0	1.89815e+08	0	2.33786e+08	>	>	>					5.37994	7.12	2	2					8.02387	9.62	3	3					8.39265	9.62	3	3	520	58.283	5.45264
Q8Y5V2	Pnp protein OS=Listeria monocytogenes GN=pnp - [Q8Y5V2_LISMO]	412650134	6.69027e+08	2.22141e+08	3.70727e+08	6.94413e+07	5.96874e+07	1.62129	1.66889	0.859536	12.5766	18.38	2	3	12.1151	18.38	2	3	17.3439	18.38	2	4	8.44919	18.38	2	2	12.9872	18.38	2	3	15.9578	18.38	2	4	272	29.457	4.94482
Q8Y6S4	Lmo1609 protein OS=Listeria monocytogenes GN=lmo1609 - [Q8Y6S4_LISMO]	2005523711	3567948546	8.36729e+08	2.42787e+09	5.21786e+08	0	1.77906	2.90162		6.57073	23.3	2	2	6.5022	23.3	2	2	7.02335	27.18	2	2	6.56329	23.3	2	2	6.9408	27.18	2	2					103	11.7966	4.33545
Q929B9	Lmo2256 protein OS=Listeria monocytogenes GN=lmo2256 - [Q929B9_LISMO]	2.94181e+07	8.5451e+07	0	9.06101e+07	0	0	2.90471	>		7.09989	20.23	2	2	6.25632	17.34	2	2					10.9972	17.34	2	4									173	19.0608	5.40186
Q8Y692	Smc protein OS=Listeria monocytogenes GN=smc - [Q8Y692_LISMO]	9.85144e+07	6.7374e+08	1.93909e+08	752312326	2.20925e+07	2.82409e+08	6.839	3.87972	12.7831	11.7669	4.72	3	3	49.3954	15.43	11	14	18.7521	8.43	5	6	47.4214	20.24	13	15	10.3958	4.72	3	3	52.0447	21.16	14	17	1186	133.975	5.04639
Q8Y634	Putative phosphotransferase lmo1866 OS=Listeria monocytogenes GN=lmo1866 - [Y1866_LISMO]	5.62571e+07	0	0	0	0	0				5.25782	18.52	2	2																					270	30.0018	5.41455
Q8Y7H7	LexA repressor OS=Listeria monocytogenes GN=lexA - [LEXA_LISMO]	0	4.85402e+08	0	2.14509e+08	0	1.89097e+08	>	>	>					5.66057	16.67	2	2					5.74962	16.67	2	2					5.69518	16.67	2	2	204	22.6237	4.97021
Q8Y8K3	Lmo0898 protein OS=Listeria monocytogenes GN=lmo0898 - [Q8Y8K3_LISMO]	2.22687e+08	9.31685e+08	8.07495e+07	3.08689e+08	2.1572e+07	2.26833e+08	4.18382	3.82279	10.5151	16.8161	11.59	5	5	55.136	23.03	13	17	9.30891	6.34	3	3	26.3975	14.62	8	10	8.20049	6.62	3	3	30.9065	11.31	6	10	725	81.5166	5.5415
Q8Y9F3	Lmo0575 protein OS=Listeria monocytogenes GN=lmo0575 - [Q8Y9F3_LISMO]	0	332402355	0	0	0	0	>							6.71787	12.4	2	2																	242	28.0697	7.12256
Q8Y797	Lmo1393 protein OS=Listeria monocytogenes GN=lmo1393 - [Q8Y797_LISMO]	4.69394e+08	6.49713e+08	1.9868e+08	4.96601e+08	8.64782e+07	1.58977e+08	1.38415	2.4995	1.83834	19.2243	19.63	7	7	15.806	15.42	5	5	17.8021	18.93	6	6	15.6748	12.62	4	5	20.9735	17.52	6	7	19.1322	18.93	6	6	428	48.6836	4.98291
Q8Y5M5	Cell division protein ftsZ OS=Listeria monocytogenes GN=ftsZ - [Q8Y5M5_LISMO]	0	2.35098e+08	0	1.15769e+08	0	0	>	>						11.8158	11.51	3	4					8.73964	7.93	2	3									391	41.3251	4.85596
Q8Y4L1	Lmo2426 protein OS=Listeria monocytogenes GN=lmo2426 - [Q8Y4L1_LISMO]	1.05874e+09	1.90891e+09	298243161	6.62505e+08	1.90998e+08	5.15035e+08	1.80301	2.22136	2.69654	6.41378	19.66	2	2	5.43429	19.66	2	2	5.20388	19.66	2	2	7.90302	19.66	2	3	5.87645	19.66	2	2	5.61555	19.66	2	2	117	13.6419	5.59229
Q8Y5L1	Lmo2048 protein OS=Listeria monocytogenes GN=lmo2048 - [Q8Y5L1_LISMO]	9.09529e+07	0	0	0	0	0				5.70751	15.73	2	2																					178	20.6753	4.61475
Q8Y6Y7	MinD protein OS=Listeria monocytogenes GN=minD - [Q8Y6Y7_LISMO]	2.99005e+08	2.01872e+09	7.27923e+07	6.43977e+08	5.28756e+07	5.7953e+08	6.75146	8.84677	10.9603	8.43959	15.41	3	3	20.639	22.18	6	7	13.8389	15.41	3	5	17.7141	18.42	4	5	11.5054	15.41	3	4	24.5094	22.56	5	7	266	29.0483	5.21143
Q8Y7Q2	Phenylalanyl-tRNA synthetase alpha chain OS=Listeria monocytogenes GN=pheS - [SYFA_LISMO]	6.34961e+08	6.68726e+08	289315680	3.85839e+08	9.06667e+07	2.53166e+08	1.05318	1.33363	2.79227	18.1796	23.71	5	6	14.3593	18.57	4	5	13.6977	23.14	5	5	14.9365	18.57	5	5	14.6686	18	4	5	9.1723	12.86	3	3	350	39.2476	5.26221
Q8Y7B2	Lmo1374 protein OS=Listeria monocytogenes GN=lmo1374 - [Q8Y7B2_LISMO]	0	9.81841e+08	1.82738e+08	7.3776e+08	0	4.33422e+08	>	4.03725	>					14.539	14.18	4	5	9.74672	11.3	2	3	20.928	20.91	6	7					20.9299	19.71	5	7	416	45.0826	5.33838
Q8Y7L7	Lmo1258 protein OS=Listeria monocytogenes GN=lmo1258 - [Q8Y7L7_LISMO]	4.89251e+08	1.11693e+09	1.86316e+08	7.26323e+08	1.23248e+08	4.79018e+08	2.28293	3.89834	3.88662	13.503	10.46	3	4	16.7551	26.14	5	5	11.9667	10.46	3	4	10.0696	10.46	3	3	12.5343	10.46	3	4	10.6792	10.46	3	3	306	34.4835	6.15088
P61055	50S ribosomal protein L4 OS=Listeria monocytogenes GN=rplD - [RL4_LISMO]	0	2.20951e+08	0	1.85853e+08	0	1.10091e+08	>	>	>					8.43611	26.09	3	3					6.5284	20.77	2	2					7.98131	20.77	2	2	207	22.5895	10.0229
Q8Y564	Uroporphyrinogen decarboxylase OS=Listeria monocytogenes GN=hemE - [DCUP_LISMO]	6.86548e+08	9.36047e+08	3.0236e+08	527219916	6.64296e+07	5.05254e+08	1.36341	1.74368	7.60585	19.1459	18.41	4	6	26.4536	26.06	6	9	7.08977	11.9	3	3	9.29659	11.61	3	3	9.64802	11.9	3	3	12.9227	23.8	4	4	353	39.9029	6.07471
P66103	50S ribosomal protein L20 OS=Listeria monocytogenes GN=rplT - [RL20_LISMO]	2.79268e+09	3.40874e+09	1.48365e+09	3.71397e+09	4.57744e+08	1.13823e+09	1.2206	2.50326	2.48661	73.0515	26.05	3	16	22.8651	18.49	2	5	29.7427	18.49	2	7	40.0318	18.49	2	10	15.339	26.05	3	4	19.3757	18.49	2	4	119	13.6786	10.9897
Q8Y992	Lmo0641 protein OS=Listeria monocytogenes GN=lmo0641 - [Q8Y992_LISMO]	2.82749e+08	1022087765	6.54049e+07	4.23221e+08	0	3.16643e+08	3.61482	6.47078	>	7.98682	10.86	3	3	15.1541	10.22	4	5	8.18001	3.99	2	3	27.7503	13.9	5	9					15.382	10.22	4	5	626	67.6627	5.71924
Q8Y6Q2	TrpG protein OS=Listeria monocytogenes GN=trpG - [Q8Y6Q2_LISMO]	0	2.05968e+08	0	0	0	7.03551e+07	>		>					13.3535	25.87	2	4													13.1683	25.87	2	3	201	21.9443	5.2749
Q92AU7	Lmo1710 protein OS=Listeria monocytogenes GN=lmo1710 - [Q92AU7_LISMO]	0	2.42079e+09	0	8.53421e+08	5.39711e+07	3.43171e+08	>	>	6.35842					22.1443	25.68	5	8					7.80236	25.68	3	3	5.4331	25	2	2	12.1136	20.27	3	4	148	16.3947	3.9165
Q8Y9C1	FMN-dependent NADH-azoreductase 1 OS=Listeria monocytogenes GN=azoR1 - [AZOR1_LISMO]	0	1.40881e+09	0	9.72894e+08	0	6.67416e+08	>	>	>					10.3305	25.48	3	3					7.24876	21.63	2	2					8.04493	21.63	2	2	208	23.0107	5.03369
Q8Y9A7	Lmo0625 protein OS=Listeria monocytogenes GN=lmo0625 - [Q8Y9A7_LISMO]	3.56729e+08	8.75676e+08	0	7.70727e+08	0	5.38856e+08	2.45474	>	>	5.38693	13.3	2	2	14.2225	19.31	5	5					17.6997	25.32	6	6					14.9297	18.03	4	5	233	26.6126	7.56201
Q8Y4B8	ATP synthase subunit b OS=Listeria monocytogenes GN=atpF - [ATPF_LISMO]	0	0	0	6.7653e+07	0	0		>														6.12292	25.29	2	2									170	19.3782	5.04639
Q8Y733	Shikimate dehydrogenase 2 OS=Listeria monocytogenes GN=aroE2 - [Q8Y733_LISMO]	4.6859e+07	0	0	0	0	0				8.28482	19.41	2	2																					273	29.9534	5.10986
Q8YAV1	Lmo0012 protein OS=Listeria monocytogenes GN=lmo0012 - [Q8YAV1_LISMO]	100407540	1.10775e+08	3.03802e+07	9.08551e+07	0	3.86337e+07	1.10325	2.9906	>	7.92717	9.47	2	2	11.9571	13.37	3	3	5.6311	7.8	2	2	9.0932	11.98	3	3					8.49815	9.47	2	2	359	39.9554	6.23975
Q8Y9L8	Ribose-phosphate pyrophosphokinase 2 OS=Listeria monocytogenes GN=prs2 - [KPRS2_LISMO]	0	5.26037e+08	0	2.5686e+08	0	1.12099e+08	>	>	>					62.8428	24.76	6	21					9.1147	13.18	3	3					14.4882	15.76	4	5	311	34.3231	6.45557
Q48761	DNA repair protein RadA homolog OS=Listeria monocytogenes GN=radA - [RADA_LISMO]	1.52298e+08	1.34332e+09	9.67018e+07	5.38743e+08	0	4.00124e+08	8.82031	5.57118	>	10.2065	8.32	3	3	18.8106	21.88	6	6	4.94745	6.35	2	2	18.7926	17.51	6	6					19.1902	14.66	5	6	457	49.9499	7.97217
Q9X768	Lmo1408 protein OS=Listeria monocytogenes GN=orfA - [Q9X768_LISMO]	0	9.76119e+07	0	0	0	0	>							6.82094	18.18	2	2																	176	20.7029	8.79248
O08352	RNA polymerase sigma-54 factor (Sigma-L) OS=Listeria monocytogenes GN=rpoN - [O08352_LISMO]	0	1.36797e+08	0	0	0	0	>							10.834	8.28	2	3																	447	50.823	4.98291
Q8YAK8	Lmo0110 protein OS=Listeria monocytogenes GN=lmo0110 - [Q8YAK8_LISMO]	1.89307e+08	2.86681e+08	8.99817e+07	2.0459e+08	2.84366e+07	1.23765e+08	1.51437	2.27369	4.35232	10.6627	18.06	3	3	10.2128	18.06	3	3	10.2301	12.4	2	3	16.3493	18.06	3	5	9.6407	18.06	3	3	7.01333	12.4	2	2	371	40.4372	4.61475
Q8Y5A3	Lmo2166 protein OS=Listeria monocytogenes GN=lmo2166 - [Q8Y5A3_LISMO]	4.48349e+08	4.941e+08	4.95506e+07	2.20595e+08	0	0	1.10204	4.45191		13.0361	23.32	3	5	16.1923	23.77	4	5	8.58957	17.04	2	3	7.16406	16.59	2	3									223	26.0617	7.76709
Q8Y9V5	Lmo0415 protein OS=Listeria monocytogenes GN=lmo0415 - [Q8Y9V5_LISMO]	0	5.23756e+08	0	1.9019e+08	0	3.32332e+07	>	>	>					21.1468	21.46	5	5					17.8117	19.1	5	5					16.6214	12.66	3	5	466	52.4631	9.46631
Q8YA14	Lmo0352 protein OS=Listeria monocytogenes GN=lmo0352 - [Q8YA14_LISMO]	0	3.11758e+08	0	1.31215e+08	0	1.68761e+08	>	>	>					6.68109	12.99	2	2					6.58491	12.99	2	2					7.21854	16.14	2	2	254	28	6.41748
Q8Y8T0	Lmo0814 protein OS=Listeria monocytogenes GN=lmo0814 - [Q8Y8T0_LISMO]	1.02009e+08	7.12516e+08	0	3.52162e+08	0	2.40702e+08	6.98485	>	>	6.70876	9.39	2	3	15.2203	23.95	4	5					4.51421	9.39	2	2					4.8109	9.39	2	2	309	32.4132	5.43994
Q8Y440	50S ribosomal protein L3 OS=Listeria monocytogenes GN=rplC - [RL3_LISMO]	3.00524e+08	2.78019e+08	0	3.49027e+08	0	1.08343e+08	0.925111	>	>	12.5728	14.35	2	3	16.0648	14.35	2	4					15.8637	23.92	3	4					12.764	14.35	2	3	209	22.8113	9.81787
Q8Y755	Lmo1450 protein OS=Listeria monocytogenes GN=lmo1450 - [Q8Y755_LISMO]	0	125354239	0	0	0	0	>							7.69524	8.51	2	3																	435	49.6206	9.77393
Q92F34	Lmo0241 protein OS=Listeria monocytogenes GN=lmo0241 - [Q92F34_LISMO]	0	6.13344e+08	0	4.37134e+08	1.69503e+08	6.71742e+07	>	>	0.3963					9.64466	19.52	3	3					7.62356	13.15	3	3	4.48779	7.57	2	2	6.48952	16.33	2	2	251	28.0607	7.54736
Q8Y8P0	UDP-N-acetylmuramoyl-tripeptide--D-alanyl-D-alanine ligase OS=Listeria monocytogenes GN=murF - [Q8Y8P0_LISMO]	7.43339e+08	1.14373e+09	2.25497e+08	3.12798e+08	1.19973e+08	2.29044e+08	1.53864	1.38715	1.90913	14.3628	14.44	5	5	20.8528	14.66	5	6	18.3837	14.44	5	6	18.4797	12.69	4	5	16.5542	13.57	4	4	14.1441	9.63	3	4	457	50.4301	5.38916
Q8Y6Z2	Glycerol kinase OS=Listeria monocytogenes GN=glpK - [GLPK_LISMO]	8.19272e+08	1.35418e+09	0	949123554	1.46215e+08	5.50473e+08	1.65291	>	3.76483	19.8244	15.69	4	6	10.1059	12.47	3	3					15.2012	12.47	3	5	12.4039	12.47	3	4	16.7184	12.47	3	5	497	55.4281	5.05908
Q92BM7	Lmo1486 protein OS=Listeria monocytogenes GN=lmo1486 - [Q92BM7_LISMO]	3.56267e+08	4.64808e+08	0	0	7.22052e+07	203516867	1.30466		2.81859	8.50777	23.73	3	3	14.4976	23.73	3	5									6.17652	19.49	2	2	8.77693	19.49	2	3	118	13.3137	4.90674
Q8Y5Z3	Lmo1910 protein OS=Listeria monocytogenes GN=lmo1910 - [Q8Y5Z3_LISMO]	0	4.38926e+08	0	2.56432e+08	0	2.26698e+08	>	>	>					12.3146	16.3	3	3					14.8547	15.49	3	4					8.81315	11.68	3	3	368	39.6675	5.22412
Q8YA24	Lmo0341 protein OS=Listeria monocytogenes GN=lmo0341 - [Q8YA24_LISMO]	0	4.00484e+08	0	2.98396e+08	2.92614e+07	0	>	>						4.93272	23.64	2	2					7.28221	23.64	2	3	4.6457	23.64	2	2					110	12.5265	5.90967
Q927L4	50S ribosomal protein L16 OS=Listeria monocytogenes GN=rplP - [RL16_LISMO]	0	0	0	0	0	1.8007e+08			>																					7.14856	23.61	2	3	144	16.1277	10.5356
Q8Y423	Lmo2652 protein OS=Listeria monocytogenes GN=lmo2652 - [Q8Y423_LISMO]	0	809752447	0	6.66028e+08	0	2.98524e+08	>	>	>					38.1984	18.17	8	11					25.576	13.23	6	8					16.9287	8.28	4	5	688	78.8796	5.47803
Q8Y401	Lmo2677 protein OS=Listeria monocytogenes GN=lmo2677 - [Q8Y401_LISMO]	2.25307e+08	4.66844e+08	0	1.47953e+08	0	0	2.07204	>		10.1599	17.41	3	3	13.7423	23.33	4	5					10.2374	17.41	3	4									270	30.5814	4.98291
Q8Y8U3	Lmo0800 protein OS=Listeria monocytogenes GN=lmo0800 - [Q8Y8U3_LISMO]	0	2.96465e+08	0	0	0	0	>							6.79372	23.28	2	2																	116	13.3586	4.61475
Q8Y7B8	DNA repair and genetic recombination OS=Listeria monocytogenes GN=recN - [Q8Y7B8_LISMO]	1.22309e+08	3.75886e+08	8.99668e+07	2.98136e+08	2.31152e+07	1.37242e+08	3.07325	3.31384	5.93729	23.5858	10.3	2	6	17.3393	14.56	4	5	15.8775	10.3	2	4	15.2655	12.61	3	4	12.0356	10.3	2	3	30.0243	14.56	4	8	563	63.4835	5.38916
Q8Y757	Probable manganese-dependent inorganic pyrophosphatase OS=Listeria monocytogenes GN=ppaC - [PPAC_LISMO]	7.20824e+08	1.03576e+09	1.90181e+08	5.6632e+08	7.8932e+07	2.24706e+08	1.43691	2.97779	2.84683	16.6051	12.99	3	5	17.7677	19.16	5	6	18.1832	20.13	5	6	18.5201	23.05	6	7	12.0185	16.23	4	4	18.7167	19.16	5	6	308	33.7404	4.76709
Q8Y8S5	Lmo0819 protein OS=Listeria monocytogenes GN=lmo0819 - [Q8Y8S5_LISMO]	0	1.75214e+08	0	6.18988e+07	0	7.55515e+07	>	>	>					8.57618	19.15	3	3					5.16346	7.45	2	2					10.273	23.05	4	4	282	32.416	5.45264
Q8Y7D2	Lmo1351 protein OS=Listeria monocytogenes GN=lmo1351 - [Q8Y7D2_LISMO]	0	0	0	4.45654e+08	0	0		>														10.4466	23.02	2	3									126	14.8521	10.0669
Q9S5A3	Chaperone protein dnaJ OS=Listeria monocytogenes GN=dnaJ - [DNAJ_LISMO]	3.04148e+08	3.67971e+08	0	3.43465e+08	3.56487e+07	1.18518e+08	1.20984	>	3.3246	11.3611	11.14	2	3	16.6418	13.26	3	4					7.48499	9.55	2	2	11.4487	10.61	2	3	11.7225	14.32	3	3	377	41.0515	7.88428
Q8Y4S2	Transmembrane protein OS=Listeria monocytogenes GN=lmo2360 - [Q8Y4S2_LISMO]	0	1.6516e+09	0	8.8652e+08	0	5.08231e+08	>	>	>					43.0515	21.04	13	13					30.3201	13.38	9	10					48.6225	19.2	11	15	927	97.1341	6.50732
Q8Y8C0	Peptide chain release factor 3 OS=Listeria monocytogenes GN=prfC - [RF3_LISMO]	575766230	8.91997e+08	3.36489e+08	5.51173e+08	1.18058e+08	2.92535e+08	1.54923	1.63801	2.47789	21.2987	22.61	7	7	18.1359	13.41	5	6	9.85816	6.9	2	3	13.3605	11.3	5	5	15.6618	11.3	4	5	8.7586	7.09	3	3	522	59.362	5.42725
Q8Y851	Lmo1067 protein OS=Listeria monocytogenes GN=lmo1067 - [Q8Y851_LISMO]	4.18336e+08	5.21174e+08	9.28003e+07	4.9038e+08	5.46885e+07	1.82277e+08	1.24583	5.28425	3.33301	26.0834	16.67	8	8	30.6836	16.18	7	10	13.115	8.01	4	5	16.6463	12.58	6	6	7.07805	5.72	3	3	10.5958	9.97	4	4	612	68.6851	5.13525
Q8Y3T8	Probable transaldolase 1 OS=Listeria monocytogenes GN=tal1 - [TAL1_LISMO]	498837504	454532244	0	1.83585e+08	0	0	0.911183	>		4.82908	8.88	2	2	7.12018	17.76	3	3					5.58989	14.49	2	2									214	23.0811	5.09717
Q8YA73	Lmo0286 protein OS=Listeria monocytogenes GN=lmo0286 - [Q8YA73_LISMO]	0	8.08578e+07	0	1.44222e+08	0	9.32687e+07	>	>	>					9.25187	5.85	2	2					6.75729	9.92	2	2					6.45826	7.89	2	2	393	43.4867	4.729
Q8Y6T8	Septation ring formation regulator EzrA OS=Listeria monocytogenes GN=ezrA - [EZRA_LISMO]	0	3.58719e+08	0	1.27105e+08	0	1.10214e+08	>	>	>					26.5299	15.06	4	7					23.9819	16.81	5	7					11.0796	6.48	2	3	571	66.4781	4.98291
Q8Y4J0	Lmo2449 protein OS=Listeria monocytogenes GN=lmo2449 - [Q8Y4J0_LISMO]	1.1256e+09	9.70203e+08	2.41534e+08	4.40492e+08	2.60481e+08	3.39663e+08	0.861945	1.82373	1.30398	25.5267	13.87	6	8	23.5398	13.49	6	7	24.7028	10.84	5	7	14.6693	8.45	4	4	19.0928	10.21	5	6	11.2596	7.06	3	3	793	90.4927	6.04932
Q8Y715	Lmo1511 protein OS=Listeria monocytogenes GN=lmo1511 - [Q8Y715_LISMO]	0	9.53801e+07	0	0	0	22511871	>		>					8.29796	16.26	2	2													11.6637	15.85	2	3	246	26.7574	5.43994
Q8Y7P2	Lmo1231 protein OS=Listeria monocytogenes GN=lmo1231 - [Q8Y7P2_LISMO]	2.37723e+08	3.36377e+08	1.42605e+08	3.95979e+08	3.30972e+07	1.45103e+08	1.41499	2.77675	4.38415	6.70337	6.67	2	2	14.0015	9.47	3	4	8.3591	9.82	3	3	11.9482	9.82	3	3	15.0305	9.47	3	4	22.4652	13.86	5	7	570	64.0363	5.85889
Q8Y8P8	Lmo0848 protein OS=Listeria monocytogenes GN=lmo0848 - [Q8Y8P8_LISMO]	0	904160459	0	0	0	0	>							7.84807	21.9	2	2																	242	26.6577	5.05908
Q8YA87	Lmo0272 protein OS=Listeria monocytogenes GN=lmo0272 - [Q8YA87_LISMO]	0	284466082	0	114967564	2.56182e+07	4.76068e+07	>	>	1.85832					8.8342	10	2	3					6.7032	11.85	2	2	14.0508	10.37	2	4	5.84008	10.37	2	2	270	30.3326	4.89404
Q9RQJ0	Lmo1601 protein OS=Listeria monocytogenes GN=lmo1601 - [Q9RQJ0_LISMO]	0	6.56261e+08	0	3.77567e+08	0	1.36844e+08	>	>	>					16.0387	16.67	3	5					7.20346	15.52	2	2					10.0959	20.69	3	3	174	18.4348	8.104
P47847	Protein translocase subunit secA 1 OS=Listeria monocytogenes GN=secA1 - [SECA1_LISMO]	8.99489e+08	4.50648e+08	1.6344e+08	2.82325e+08	5.90243e+07	1.88675e+08	0.501004	1.72739	3.19657	30.8086	13.74	7	10	17.1001	9.92	5	6	19.9702	11.59	5	7	11.0769	7.17	3	3	9.65459	5.62	3	3	16.5996	8.24	4	5	837	94.6001	5.16064
Q8YAJ3	Lmo0132 protein OS=Listeria monocytogenes GN=lmo0132 - [Q8YAJ3_LISMO]	2.66003e+08	2.00067e+08	7.2791e+07	1.31742e+08	5.69422e+07	8.3781e+07	0.752124	1.80986	1.47133	13.1741	11.75	5	5	10.518	7.77	4	4	7.93437	5.98	3	3	10.9818	11.16	4	4	5.00114	3.98	2	2	5.03744	3.98	2	2	502	55.0026	5.38916
Q8Y4U4	Lmo2337 protein OS=Listeria monocytogenes GN=lmo2337 - [Q8Y4U4_LISMO]	0	2.39849e+08	0	0	0	0	>							8.40037	21.2	3	3																	250	28.1097	6.45557
Q8Y4C4	UDP-N-acetylglucosamine 1-carboxyvinyltransferase 1 OS=Listeria monocytogenes GN=murA1 - [MURA1_LISMO]	0	3.51954e+08	0	2.24791e+08	0	2.1724e+08	>	>	>					11.1213	9.53	3	4					12.1827	10.23	3	4					5.52452	7.21	2	2	430	45.9498	5.04639
Q8Y639	Lmo1861 protein OS=Listeria monocytogenes GN=lmo1861 - [Q8Y639_LISMO]	0	6.55704e+07	0	0	0	2.90655e+07	>		>					9.95057	21.08	3	3													5.81655	17.65	2	2	204	23.2363	8.73389
Q8YAC2	Sul protein OS=Listeria monocytogenes GN=sul - [Q8YAC2_LISMO]	0	2.91105e+08	0	0	0	0	>							4.49391	14.02	2	2																	271	29.5724	5.31299
Q8Y6Q7	Tryptophan synthase alpha chain OS=Listeria monocytogenes GN=trpA - [TRPA_LISMO]	8.37279e+07	1.91216e+08	0	0	0	0	2.28378			13.8146	21.01	2	4	10.2839	21.01	2	3																	257	27.873	5.77002
Q8Y4G8	Lmo2475 protein OS=Listeria monocytogenes GN=lmo2475 - [Q8Y4G8_LISMO]	125390202	2.84417e+08	0	1.58076e+08	0	0	2.26825	>		7.22315	5.21	2	2	7.00085	7.81	2	2					5.99517	5.21	2	2									576	64.0735	5.05908
Q48762	Uncharacterized protein Lmo0234 OS=Listeria monocytogenes GN=lmo0234 - [Y234_LISMO]	0	6.5838e+08	0	2.4832e+08	0	1.38165e+08	>	>	>					16.8022	17.93	3	4					10.7818	13.73	2	3					22.8208	21.01	4	6	357	39.4362	6.40479
Q8Y5N9	Diaminopimelate epimerase OS=Listeria monocytogenes GN=dapF - [DAPF_LISMO]	3.20015e+08	3.92615e+08	6.43824e+07	2.35678e+08	0	0	1.22686	3.6606		14.0002	20.97	4	4	7.15339	10.33	2	2	6.3846	9.12	2	2	12.8368	17.93	3	3									329	36.048	4.83057
Q8Y920	Lmo0722 protein OS=Listeria monocytogenes GN=lmo0722 - [Q8Y920_LISMO]	1.96535e+08	4.5968e+08	8.99945e+07	3.86042e+08	5.41066e+07	2.13174e+08	2.33891	4.28962	3.93989	8.57614	8.68	3	3	16.731	15.28	4	5	11.7248	8.68	3	4	16.9495	13.19	3	5	13.4878	14.06	4	4	13.2033	13.72	4	4	576	62.7847	5.021
Q9RR46	ATPase homolog GbuA OS=Listeria monocytogenes GN=gbuA - [Q9RR46_LISMO]	0	8.42651e+07	0	8.03495e+07	0	0	>	>						19.0144	17.13	2	6					7.45372	20.65	3	3									397	43.599	6.46826
Q8Y7J0	DNA topoisomerase IV subunit A OS=Listeria monocytogenes GN=parC - [Q8Y7J0_LISMO]	3.1188e+08	2.72052e+08	6.69289e+07	2.46055e+08	3.03573e+07	1.11709e+08	0.872298	3.67637	3.67981	14.3093	9.16	5	5	8.53591	5.37	3	3	15.4065	4.52	3	5	11.4491	5.37	3	3	12.254	4.4	3	4	10.0356	5.37	3	3	819	92.1442	6.37939
Q8Y8A0	Putative N-acetyldiaminopimelate deacetylase OS=Listeria monocytogenes GN=dapL - [DAPL_LISMO]	2.11876e+08	3.20686e+08	0	0	0	1.95285e+08	1.51355		>	6.00749	9.43	2	2	6.14757	9.43	2	2													4.81912	9.43	2	2	371	41.604	5.23682
Q8Y6U9	Lmo1582 protein OS=Listeria monocytogenes GN=lmo1582 - [Q8Y6U9_LISMO]	7.6857e+07	1.61973e+08	0	0	0	0	2.10745			10.1401	13.25	2	3	28.4935	20.48	3	7																	332	37.1955	4.99561
Q8Y9J3	UPF0210 protein lmo0534 OS=Listeria monocytogenes GN=lmo0534 - [Y534_LISMO]	5.58485e+08	0	202325417	3.14197e+08	8.21888e+07	0		1.55293		10.2711	13.53	3	3					13.9437	13.53	3	4	7.48558	8.65	2	3	9.66702	13.53	3	3					451	46.8532	5.03369
Q8Y8R9	Lmo0825 protein OS=Listeria monocytogenes GN=lmo0825 - [Q8Y8R9_LISMO]	1.83509e+08	5.52119e+08	2.10286e+07	4.49419e+08	0	2.24951e+08	3.00868	21.3718	>	10.8558	16.9	3	3	10.474	16.9	3	3	6.85026	11.74	2	2	13.0205	20.19	4	4					21.4174	16.9	3	6	426	45.8255	5.73193
Q8YAE1	4-diphosphocytidyl-2-C-methyl-D-erythritol kinase OS=Listeria monocytogenes GN=ispE - [ISPE_LISMO]	0	291904953	0	0	0	6.80903e+07	>		>					11.2403	20.14	3	3													7.18634	11.6	2	2	293	32.2158	5.59229
Q9EXF8	Beta-glucosidase OS=Listeria monocytogenes GN=bglA - [Q9EXF8_LISMO]	0	802136728	0	0	0	1.73993e+08	>		>					11.3198	12.53	3	3													8.10516	11.68	3	3	471	53.6123	5.13525
Q8Y568	Lmo2208 protein OS=Listeria monocytogenes GN=lmo2208 - [Q8Y568_LISMO]	213881473	2.93121e+08	3.22354e+07	1.84495e+08	2.3209e+07	5.38206e+07	1.37048	5.72337	2.31895	6.21883	11.72	2	2	10.8584	11.72	2	3	7.99557	11.72	2	2	9.4026	16.02	3	3	7.56763	11.72	2	2	8.13748	11.72	2	2	256	28.5302	4.66553
Q8Y5F4	Lmo2110 protein OS=Listeria monocytogenes GN=lmo2110 - [Q8Y5F4_LISMO]	2.58094e+08	3.20261e+08	3.95135e+07	1.6573e+08	3.12451e+07	1.38508e+08	1.24087	4.19426	4.43295	9.26087	12.89	3	3	9.06191	12.89	3	3	11.7001	12.89	3	4	9.04685	12.89	3	3	8.31522	7.55	2	3	10.4277	12.89	3	3	318	35.3438	5.03369
Q8Y695	Ffh protein OS=Listeria monocytogenes GN=ffh - [Q8Y695_LISMO]	22163248	1.41794e+08	0	1.39355e+08	0	9.6394e+07	6.39771	>	>	7.3559	6.67	2	2	20.4397	14	4	5					15.7582	14	4	4					23.4727	17.56	5	6	450	49.6821	9.18799
Q8Y609	Lmo1893 protein OS=Listeria monocytogenes GN=lmo1893 - [Q8Y609_LISMO]	0	0	0	4.34037e+08	0	1.53776e+08		>	>													5.49403	19.63	2	2					7.69753	19.63	2	3	163	18.9799	6.94678
Q8YAG1	Lmo0165 protein OS=Listeria monocytogenes GN=lmo0165 - [Q8YAG1_LISMO]	0	3.6176e+08	0	1045565604	0	0	>	>						9.4414	12	2	3					6.07361	15.2	2	2									250	28.5232	5.98584
Q92FQ6	DnaC protein OS=Listeria monocytogenes GN=dnaC - [Q92FQ6_LISMO]	0	6.93064e+08	0	6.81203e+08	0	4.36771e+08	>	>	>					19.1952	14.89	3	5					15.7323	14.89	3	4					26.461	19.56	4	6	450	50.0045	4.84326
Q8Y3S6	Lmo2755 protein OS=Listeria monocytogenes GN=lmo2755 - [Q8Y3S6_LISMO]	2.91127e+08	3.04404e+08	1.14046e+08	1.03042e+08	0	6.08536e+07	1.04561	0.903512	>	13.1311	9.19	4	5	15.5137	14.95	5	5	12.681	14.59	5	5	12.2842	10.63	4	4					5.02337	4.86	2	2	555	62.7578	5.23682
Q8YAG4	Lmo0162 protein OS=Listeria monocytogenes GN=lmo0162 - [Q8YAG4_LISMO]	1.12062e+08	1.4336e+08	2.74213e+07	0	1.36537e+07	3.82615e+07	1.2793		2.80228	6.01265	9.09	2	2	11.6908	16.06	3	4	5.11521	9.09	2	2					5.92577	9.09	2	2	10.0504	9.09	2	3	330	37.0362	5.88428
Q8YAG2	Initiation-control protein yabA OS=Listeria monocytogenes GN=lmo0164 - [YABA_LISMO]	2.29262e+07	4.41231e+07	0	4.45994e+07	0	0	1.92457	>		15.8084	19.38	2	4	7.88339	19.38	2	2					10.8393	19.38	2	3									129	14.7751	4.80518
Q8Y7C8	Lmo1356 protein OS=Listeria monocytogenes GN=lmo1356 - [Q8Y7C8_LISMO]	4.27245e+10	7.53975e+09	3.2897e+09	534393939	6.64679e+08	4.14779e+08	0.176474	0.162445	0.62403	371.71	19.35	3	104	114.52	19.35	3	25	431.841	19.35	3	127	133.858	19.35	3	30	189.686	19.35	3	54	112.127	14.19	2	24	155	16.5666	4.44971
Q8Y741	Lmo1481 protein OS=Listeria monocytogenes GN=lmo1481 - [Q8Y741_LISMO]	0	6.92246e+07	0	2.59791e+07	0	2.8842e+07	>	>	>					11.5248	19.24	4	4					6.48787	9.62	3	3					7.86233	9.33	2	2	343	39.9712	5.74463
Q8Y420	Deoxyguanosinetriphosphate triphosphohydrolase-like protein OS=Listeria monocytogenes GN=lmo2657 - [DGTL2_LISMO]	2.66421e+08	2.89467e+08	1.97929e+08	3.28518e+08	4.09793e+07	2.56569e+08	1.0865	1.65977	6.26093	16.7945	14.62	4	5	11.9222	8.39	3	4	6.23171	6.67	2	2	17.3967	12.9	4	5	7.11759	6.88	2	2	13.3747	17.85	5	5	465	53.4511	5.45264
Q8Y793	Putative competence-damage inducible protein OS=Listeria monocytogenes GN=cinA - [CINA_LISMO]	2.47123e+08	3.74866e+08	4.41849e+07	1.51763e+08	2.81075e+07	1.27092e+08	1.51692	3.43473	4.52163	15.6004	11.59	3	6	8.40175	7.49	2	3	7.92003	6.76	2	3	13.5704	14.49	4	5	4.61589	6.76	2	2	4.53188	7.49	2	2	414	45.6474	5.21143
P66461	30S ribosomal protein S18 OS=Listeria monocytogenes GN=rpsR - [RS18_LISMO]	1.21965e+09	6.05586e+09	2.76597e+08	3.26439e+09	2.77344e+08	1.83488e+09	4.96526	11.802	6.61589	9.54973	18.99	2	3	5.38959	18.99	2	2	7.75523	18.99	2	3	8.47753	18.99	2	3	12.5017	18.99	2	5	11.4091	18.99	2	4	79	9.09206	11.0337
Q8Y7C9	Lmo1354 protein OS=Listeria monocytogenes GN=lmo1354 - [Q8Y7C9_LISMO]	0	0	0	1.51685e+08	0	0		>														7.29787	10.76	2	2									353	38.9919	5.07178
Q8Y6K9	2-succinyl-5-enolpyruvyl-6-hydroxy-3-cyclohexene-1-carboxylate synthase OS=Listeria monocytogenes GN=menD - [MEND_LISMO]	2.63243e+08	2.82586e+08	1.38737e+08	2.1596e+08	0	4.85396e+07	1.07348	1.55662	>	12.6906	11.55	3	3	16.5171	12.76	4	5	18.1892	11.38	4	5	13.0075	10.17	4	4					7.07158	3.97	3	3	580	64.6442	5.79541
Q8Y887	Lmo1030 protein OS=Listeria monocytogenes GN=lmo1030 - [Q8Y887_LISMO]	2.32276e+08	0	5.59255e+07	0	0	0				8.57105	14.62	3	3					8.41479	11.11	3	3													342	38.4661	5.70654
Q8Y3R0	Lmo2773 protein OS=Listeria monocytogenes GN=lmo2773 - [Q8Y3R0_LISMO]	0	6.67092e+07	0	4.10757e+07	0	2.51806e+07	>	>	>					13.853	18.64	3	4					8.50851	14.7	2	2					12.1103	14.7	2	3	279	32.7427	5.021
Q8Y679	Lmo1820 protein OS=Listeria monocytogenes GN=lmo1820 - [Q8Y679_LISMO]	855293784	7.46808e+08	1.17546e+08	2.50002e+08	1.10088e+08	8.72005e+07	0.87316	2.12684	0.792097	22.98	16.95	7	8	18.3822	16.64	7	7	28.7356	16.95	7	10	12.2248	10.38	4	4	16.2661	12.98	5	6	11.4869	6.72	3	4	655	72.1423	5.35107
P22262	Listeriolysin regulatory protein OS=Listeria monocytogenes GN=prfA - [PRFA_LISMO]	0	9.91368e+08	0	1.20248e+09	0	1.11514e+09	>	>	>					15.0431	18.14	3	4					18.9514	18.14	3	5					20.5413	18.14	3	5	237	27.284	8.06006
Q8Y776	UDP-N-acetylenolpyruvoylglucosamine reductase OS=Listeria monocytogenes GN=murB - [MURB_LISMO]	1.56328e+08	0	0	0	0	0				10.9202	14.09	2	3																					298	32.1859	6.65381
Q929C7	Lmo2248 protein OS=Listeria monocytogenes GN=lmo2248 - [Q929C7_LISMO]	8.04859e+08	2.7147e+09	9.04563e+07	6.90758e+08	6.59263e+07	5.19339e+08	3.37289	7.63637	7.87757	25.1922	17.48	3	7	21.0185	17.96	3	6	13.8855	13.59	2	4	15.7411	17.96	4	5	10.2908	13.59	2	3	15.9168	17.96	3	5	206	23.8889	4.81787
Q8Y831	Lmo1087 protein OS=Listeria monocytogenes GN=lmo1087 - [Q8Y831_LISMO]	0	7.26563e+07	0	0	0	5.43666e+07	>		>					8.32634	16.42	2	2													13.3344	17.89	2	3	341	38.4625	4.94482
Q8Y7M0	Lmo1254 protein OS=Listeria monocytogenes GN=lmo1254 - [Q8Y7M0_LISMO]	4.87816e+08	289499861	1.20767e+08	0	5.21571e+07	7.23363e+07	0.593461		1.38689	21.5761	11.86	4	6	18.626	13.87	4	5	8.65825	6.39	2	3					10.1705	5.66	2	3	10.4145	9.49	3	3	548	63.1542	5.17334
Q8Y9K6	Lmo0521 protein OS=Listeria monocytogenes GN=lmo0521 - [Q8Y9K6_LISMO]	2.28269e+08	4.03488e+08	9.67798e+07	369496956	0	1.82717e+08	1.7676	3.81792	>	14.4346	15.75	3	4	9.67365	15.75	3	3	25.1925	15.75	3	7	6.71688	11.19	2	2					7.50207	9.13	2	2	438	48.9602	5.14795
Q92BX8	Two-component response regulator OS=Listeria monocytogenes GN=lisR - [Q92BX8_LISMO]	0	0	2.02965e+07	0	0	0												4.48866	4.87	2	2													226	26.4029	5.07178
Q8Y8L3	Lmo0884 protein OS=Listeria monocytogenes GN=lmo0884 - [Q8Y8L3_LISMO]	0	5.7752e+08	0	4.53103e+08	6.73978e+07	2.91816e+08	>	>	4.32976					17.2487	17.65	5	5					13.8592	13.94	4	4	9.27239	10.24	3	3	12.4988	13.94	4	4	459	50.266	6.27783
Q8YAM0	EIIMant PTS permease IID subunit OS=Listeria monocytogenes GN=mptD - [Q8YAM0_LISMO]	3.37408e+08	1.22397e+09	0	5.82434e+08	0	2.92702e+08	3.62756	>	>	7.2525	12.54	2	2	11.2468	12.54	2	3					15.4737	12.54	2	4					14.5251	17.49	3	4	303	33.3899	9.18799
Q8Y404	Lmo2674 protein OS=Listeria monocytogenes GN=lmo2674 - [Q8Y404_LISMO]	0	0	0	2.94942e+08	0	0		>														4.7266	17.22	2	2									151	16.1712	5.31299
Q8Y712	Lmo1514 protein OS=Listeria monocytogenes GN=lmo1514 - [Q8Y712_LISMO]	1.20188e+08	1.92446e+08	0	0	0	0	1.60121			4.85435	6.82	2	2	9.02691	11.53	3	3																	425	46.5853	6.91748
Q8Y4F7	Lmo2487 protein OS=Listeria monocytogenes GN=lmo2487 - [Q8Y4F7_LISMO]	0	1.70079e+08	0	0	0	1.04837e+08	>		>					10.4854	7.86	3	3													6.82933	7.86	2	2	420	47.2951	5.46533
Q8Y466	Lmo2589 protein OS=Listeria monocytogenes GN=lmo2589 - [Q8Y466_LISMO]	0	0	0	0	0	1.58812e+08			>																					10.3222	16.95	2	3	295	33.7673	5.36377
Q8YA12	Lmo0354 protein OS=Listeria monocytogenes GN=lmo0354 - [Q8YA12_LISMO]	3.36295e+08	1.22803e+08	6.25426e+07	0	0	7.49198e+07	0.365165		>	8.53236	7.48	3	3	5.73575	4.92	2	2	8.57058	7.48	3	3									7.42645	6.1	2	3	508	58.0497	6.7417
Q8Y624	Formate--tetrahydrofolate ligase OS=Listeria monocytogenes GN=fhs - [FTHS_LISMO]	0	3.97678e+08	0	1.6504e+08	0	1.78488e+08	>	>	>					16.0007	14.29	4	5					5.1833	6.96	2	2					7.49781	7.5	2	2	560	60.0483	5.60498
Q8Y580	Lmo2194 protein OS=Listeria monocytogenes GN=lmo2194 - [Q8Y580_LISMO]	0	2.18072e+09	0	1.19808e+09	0	6.88102e+08	>	>	>					15.9269	16.57	3	4					8.08941	11.63	2	3					10.0633	16.57	3	3	344	37.9464	7.88428
Q8Y8V1	Lmo0791 protein OS=Listeria monocytogenes GN=lmo0791 - [Q8Y8V1_LISMO]	0	3.15223e+08	0	0	0	8.58903e+07	>		>					7.33719	16.2	3	3													5.39152	11.11	2	2	216	23.9678	4.75439
Q8Y490	Lmo2565 protein OS=Listeria monocytogenes GN=lmo2565 - [Q8Y490_LISMO]	1.63944e+09	0	2.42906e+08	3.07691e+08	0	1.82681e+08		1.26671	>	10.7075	11.14	2	3					12.4648	11.14	2	4	13.5876	14.32	3	4					13.0022	11.14	2	4	440	50.822	5.41455
Q8Y3X5	DnaX protein OS=Listeria monocytogenes GN=dnaX - [Q8Y3X5_LISMO]	0	7.58762e+08	0	3.86518e+08	1.39515e+07	3.00672e+08	>	>	21.5511					34.5542	16.06	7	10					25.4751	12.61	6	8	9.09133	2.59	2	3	26.7125	12.61	6	8	579	63.4196	5.37646
Q8Y616	Lmo1886 protein OS=Listeria monocytogenes GN=lmo1886 - [Q8Y616_LISMO]	2.13375e+08	3.92557e+08	6.03682e+07	1.66588e+08	2.79262e+07	9.7999e+07	1.83975	2.75953	3.50921	22.3557	12.75	5	6	30.4399	15.94	6	8	12.3738	10.96	3	3	10.4121	10.96	3	3	7.18908	7.37	2	2	14.3767	10.96	3	4	502	57.3198	4.81787
Q8YA98	Lmo0256 protein OS=Listeria monocytogenes GN=lmo0256 - [Q8YA98_LISMO]	3.71477e+09	329177777	0	0	0	84298518	0.0886131		>	12.4134	15.92	3	4	9.37549	15.92	3	3													6.02882	10.45	2	2	201	22.5474	6.40479
Q8YA88	Lmo0271 protein OS=Listeria monocytogenes GN=lmo0271 - [Q8YA88_LISMO]	343341746	3.86128e+08	6.40913e+07	0	0	88686449	1.12462		>	11.6395	13.6	4	4	11.5691	13.6	4	4	5.47585	7.53	2	2									5.67744	7.53	2	2	478	54.5468	5.14795
Q9L723	Protein RecA OS=Listeria monocytogenes GN=recA - [RECA_LISMO]	0	5.36387e+08	0	190805820	0	9.71336e+07	>	>	>					14.764	15.8	4	5					11.7188	14.94	4	4					6.926	8.91	2	3	348	37.9706	5.16064
Q8Y7F3	tRNA pseudouridine synthase B OS=Listeria monocytogenes GN=truB - [TRUB_LISMO]	0	2.40984e+08	0	1.32178e+08	0	5.03843e+07	>	>	>					8.1734	12.5	3	3					5.85927	9.21	2	2					4.79593	7.24	2	2	304	33.7477	6.18896
Q8Y7N2	Lmo1242 protein OS=Listeria monocytogenes GN=lmo1242 - [Q8Y7N2_LISMO]	180129093	0	2.60076e+07	0	0	0				5.39323	15.74	2	2					5.58975	15.74	2	2													197	22.5478	5.73193
Q8Y3R3	Glutathione biosynthesis bifunctional protein gshAB OS=Listeria monocytogenes GN=gshAB - [GSHAB_LISMO]	0	4.27533e+08	0	0	0	6.32547e+07	>		>					9.27436	4.42	2	3													12.4443	8.84	4	4	769	87.6737	5.03369
Q8YAC0	FolK protein OS=Listeria monocytogenes GN=folK - [Q8YAC0_LISMO]	0	2.43647e+08	0	0	0	0	>							8.43757	15.72	2	3																	159	17.9754	4.67822
Q8Y567	Lmo2209 protein OS=Listeria monocytogenes GN=lmo2209 - [Q8Y567_LISMO]	0	651538752	0	0	0	0	>							5.28563	15.71	2	2																	261	29.8309	4.94482
Q8Y8E3	Lmo0961 protein OS=Listeria monocytogenes GN=lmo0961 - [Q8Y8E3_LISMO]	0	1.69285e+08	3.68514e+07	1.31852e+08	0	7.32508e+07	>	3.57795	>					11.7672	12.25	3	3	7.20237	8.33	2	2	7.54105	8.33	2	2					5.57916	8.33	2	2	408	45.7488	5.26221
Q8YAD1	Peptidyl-tRNA hydrolase OS=Listeria monocytogenes GN=pth - [PTH_LISMO]	169754790	0	5.49891e+07	1.01916e+08	0	0		1.85338		7.06943	15.59	2	2					8.20388	15.59	2	2	7.53145	15.59	2	2									186	20.966	9.21729
Q93Q56	Glutamate 5-kinase OS=Listeria monocytogenes GN=proB - [PROB_LISMO]	0	2.68182e+08	0	2.20935e+08	0	0	>	>						10.0676	15.58	2	3					6.11152	15.58	2	2									276	30.0154	5.33838
Q8Y9L2	Lmo0515 protein OS=Listeria monocytogenes GN=lmo0515 - [Q8Y9L2_LISMO]	0	8.75857e+07	0	0	0	0	>							4.42478	15.38	2	2																	143	15.4011	5.32568
Q8Y677	Lmo1822 protein OS=Listeria monocytogenes GN=lmo1822 - [Q8Y677_LISMO]	1.58038e+08	3.08585e+08	0	2.19229e+08	0	9.18854e+07	1.9526	>	>	11.0258	6.76	2	3	13.469	15.32	4	4					13.2849	15.32	4	4					9.99735	11.94	3	3	444	49.8966	6.75635
Q8Y3V1	Lmo2730 protein OS=Listeria monocytogenes GN=lmo2730 - [Q8Y3V1_LISMO]	0	2.91368e+08	0	0	0	1.00315e+08	>		>					6.16679	15.27	2	2													7.2759	15.27	2	2	203	22.5385	4.80518
Q8Y7A1	Lmo1389 protein OS=Listeria monocytogenes GN=lmo1389 - [Q8Y7A1_LISMO]	0	365398364	0	0	0	0	>							17.5683	15.2	3	5																	513	56.664	6.1001
Q8Y664	Carbamoyl-phosphate synthase small chain OS=Listeria monocytogenes GN=carA - [CARA_LISMO]	0	0	0	0	0	9.41458e+07			>																					5.03504	8.26	2	2	363	40.0303	5.47803
Q8Y3Y6	Thymidylate kinase OS=Listeria monocytogenes GN=tmk - [KTHY_LISMO]	0	1.72288e+08	0	2.26067e+07	0	4.14399e+07	>	>	>					10.3066	14.9	2	3					7.15912	14.9	2	2					6.1725	14.9	2	2	208	23.0689	5.23682
Q8Y6R2	Lmo1622 protein OS=Listeria monocytogenes GN=lmo1622 - [Q8Y6R2_LISMO]	0	1.92717e+08	0	0	0	0	>							7.35807	14.86	2	2																	276	29.7772	5.63037
Q8Y5Q8	Lmo1998 protein OS=Listeria monocytogenes GN=lmo1998 - [Q8Y5Q8_LISMO]	1.19578e+08	9.93104e+07	0	0	0	0	0.830511			9.81022	14.8	3	3	8.90376	14.8	3	3																	331	38.1138	5.73193
Q8Y6A9	Lmo1782 protein OS=Listeria monocytogenes GN=lmo1782 - [Q8Y6A9_LISMO]	0	0	0	3.81172e+08	0	2.4691e+08		>	>													5.9078	10.36	2	2					7.23606	10.36	2	2	251	29.0805	5.021
Q8Y5S2	Dihydroxy-acid dehydratase OS=Listeria monocytogenes GN=ilvD - [ILVD_LISMO]	0	1.72489e+08	0	0	0	8.66208e+07	>		>					6.80526	6.21	2	2													11.3808	6.21	2	3	564	59.8364	5.70654
Q8Y637	DegV domain-containing protein lmo1863 OS=Listeria monocytogenes GN=lmo1863 - [Y1863_LISMO]	5.8985e+08	0	8.13893e+07	0	0	0				5.22917	10.39	2	2					5.24466	10.39	2	2													279	30.941	5.23682
O85045	Alanine racemase OS=Listeria monocytogenes GN=alr - [ALR_LISMO]	1.58469e+08	0	0	0	0	0				6.79443	14.67	2	2																					368	40.9612	6.16357
Q8YAE5	Lmo0185 protein OS=Listeria monocytogenes GN=lmo0185 - [Q8YAE5_LISMO]	0	0	0	0	8.5506e+07	0																				4.83613	14.4	2	2					257	29.38	5.07178
Q8Y5N7	DivIVA protein OS=Listeria monocytogenes GN=divIVA - [Q8Y5N7_LISMO]	0	382007863	0	0	0	0	>							5.1863	14.29	2	2																	175	20.3364	4.83057
Q8Y706	RelA protein OS=Listeria monocytogenes GN=relA - [Q8Y706_LISMO]	4.31417e+08	4.67646e+08	2.27128e+08	4.91111e+08	7.59829e+07	2.54426e+08	1.08398	2.16227	3.34847	22.7461	10.7	6	8	18.0422	10.57	5	6	16.7006	9.21	5	6	16.4142	9.08	4	6	18.7023	9.21	5	6	20.3478	9.62	4	6	738	84.661	7.43018
Q8YAF9	Ribosomal RNA small subunit methyltransferase I OS=Listeria monocytogenes GN=rsmI - [Q8YAF9_LISMO]	3.59123e+08	4.54316e+08	5.5837e+07	1.24577e+08	0	1.28038e+08	1.26507	2.23109	>	13.8718	13.99	3	4	11.0291	10.24	2	3	9.73617	8.87	2	3	12.8827	13.99	3	4					10.8765	10.24	2	3	293	33.2111	5.74463
Q8Y3S5	DNA topoisomerase OS=Listeria monocytogenes GN=topB - [Q8Y3S5_LISMO]	4.29097e+08	2.91684e+08	6.03853e+07	1.06964e+08	5.79976e+07	6.59384e+07	0.679761	1.77137	1.13691	21.1247	8.23	5	8	18.2191	9.76	6	7	17.0186	11.44	7	7	10.081	6.83	4	4	13.0015	8.09	5	5	9.50505	6.28	4	4	717	81.4796	9.45166
Q8Y9D8	Lmo0592 protein OS=Listeria monocytogenes GN=lmo0592 - [Q8Y9D8_LISMO]	0	571963520	0	360601212	0	3.8814e+08	>	>	>					5.30706	13.89	2	2					4.66682	13.89	2	2					5.92162	13.89	2	2	180	19.9583	5.90967
Q8YAR3	Lmo0052 protein OS=Listeria monocytogenes GN=lmo0052 - [Q8YAR3_LISMO]	1.01701e+08	1.52724e+08	0	5.68878e+07	0	1.55851e+07	1.5017	>	>	6.67193	4.87	2	2	32.1932	9.28	4	8					28.1284	6.7	3	7					16.5059	6.7	3	4	657	74.7996	5.30029
Q8Y6W9	Transcriptional repressor NrdR OS=Listeria monocytogenes GN=nrdR - [NRDR_LISMO]	0	3.10568e+08	0	0	0	0	>							5.1171	13.64	2	2																	154	17.9261	6.72705
Q8Y6E5	Adenine deaminase OS=Listeria monocytogenes GN=ade - [ADEC_LISMO]	2.73001e+08	1.28467e+08	1.49731e+08	0	6.39749e+07	0	0.470574			23.9692	13.62	4	7	10.273	11.03	3	3	10.579	11.9	3	3					9.97678	11.9	3	3					580	62.086	5.17334
Q8Y713	Lmo1513 protein OS=Listeria monocytogenes GN=lmo1513 - [Q8Y713_LISMO]	5.73251e+08	6.34808e+08	0	0	0	0	1.10738			5.04689	9.16	2	2	6.19048	9.16	2	2																	382	41.7042	5.59229
Q8Y832	Putative 2-C-methyl-D-erythritol 4-phosphate cytidylyltransferase 2 OS=Listeria monocytogenes GN=ispD2 - [ISPD2_LISMO]	2.74472e+08	2.99773e+08	0	0	0	61606649	1.09218		>	5.67784	9.75	2	2	5.3237	9.75	2	2													5.23568	9.75	2	2	236	26.695	6.07471
Q8YAR1	Adenylosuccinate synthetase OS=Listeria monocytogenes GN=purA - [PURA_LISMO]	2.27845e+08	4.77096e+08	0	3.48521e+08	0	0	2.09395	>		6.10137	6.05	2	2	7.61102	8.14	3	3					13.2191	8.6	3	4									430	47.5755	5.85889
Q8Y7Q0	Lmo1223 protein OS=Listeria monocytogenes GN=lmo1223 - [Q8Y7Q0_LISMO]	0	190208052	0	89886872	0	0	>	>						11.9873	13.3	2	3					6.38498	13.3	2	2									233	25.4041	5.47803
Q8Y5E4	Lmo2120 protein OS=Listeria monocytogenes GN=lmo2120 - [Q8Y5E4_LISMO]	0	162682650	0	1.18094e+08	0	0	>	>						10.0399	13.19	2	3					9.25598	13.19	2	3									273	30.4255	8.29443
Q8Y8G2	Lmo0942 protein OS=Listeria monocytogenes GN=lmo0942 - [Q8Y8G2_LISMO]	8.52371e+07	1.3843e+08	0	0	0	0	1.62406			5.60088	8.49	2	2	8.51926	9.82	3	3																	601	68.3898	4.90674
Q8Y8P9	Lmo0847 protein OS=Listeria monocytogenes GN=lmo0847 - [Q8Y8P9_LISMO]	0	0	2.0648e+07	0	1.36922e+07	0												4.3008	4.17	2	2					5.28476	5	2	2					480	53.2619	8.5874
Q8Y499	Lmo2555 protein OS=Listeria monocytogenes GN=lmo2555 - [Q8Y499_LISMO]	0	2.65654e+08	0	3.08264e+08	0	0	>	>						10.9212	13.11	3	3					6.88971	8.2	2	2									427	47.8521	7.43018
Q8YA75	Methionine import ATP-binding protein MetN 1 OS=Listeria monocytogenes GN=metN1 - [METN1_LISMO]	0	0	0	0	0	4.24403e+07			>																					6.32349	13.02	2	2	338	36.9559	6.37939
Q8Y6G6	Lmo1721 protein OS=Listeria monocytogenes GN=lmo1721 - [Q8Y6G6_LISMO]	2.54391e+08	5.05404e+08	0	2.56631e+08	3.7527e+07	1.62453e+08	1.98672	>	4.32897	13.2553	5.72	4	5	12.2632	7.51	4	4					10.6477	7.51	4	4	10.716	5.72	4	4	11.9046	9.3	4	4	892	101.371	5.22412
Q8Y455	Cobalt import ATP-binding protein CbiO 1 OS=Listeria monocytogenes GN=cbiO1 - [CBIO1_LISMO]	0	2.3073e+08	0	0	0	0	>							12.1771	12.85	3	3																	288	31.9507	5.60498
Q8Y7P0	UvrABC system protein C OS=Listeria monocytogenes GN=uvrC - [UVRC_LISMO]	2.53917e+08	2.98421e+08	3.26957e+07	1.85011e+08	4.94762e+07	141567358	1.17527	5.65857	2.86132	13.0315	6.8	3	4	9.92349	6.8	3	3	5.70966	3.98	2	2	9.48962	7.63	3	3	9.59501	8.13	3	3	8.13668	7.13	3	3	603	69.271	8.74854
Q8Y5E9	Lmo2115 protein OS=Listeria monocytogenes GN=lmo2115 - [Q8Y5E9_LISMO]	9.44673e+08	8.25631e+08	4.83337e+08	7.11494e+08	2.1409e+08	4.36318e+08	0.873987	1.47205	2.03801	15.9385	12.69	4	4	27.5835	12.69	4	7	24.1776	12.69	4	6	25.9906	12.69	4	7	29.734	12.69	4	8	23.8597	12.69	4	6	646	71.5958	9.37842
Q8YAW2	Chromosomal replication initiator protein dnaA OS=Listeria monocytogenes GN=dnaA - [DNAA_LISMO]	5.97867e+07	3.51144e+08	0	8.72869e+07	0	3.75269e+07	5.87327	>	>	15.7399	9.98	3	5	20.5373	7.54	2	5					16.27	7.54	2	4					10.1638	7.54	2	3	451	51.3495	6.0874
Q8Y6X5	Porphobilinogen deaminase OS=Listeria monocytogenes GN=hemC - [HEM3_LISMO]	0	0	0	0	0	1.15145e+07			>																					6.43156	12.62	2	2	309	33.9159	5.61768
Q8Y433	Lmo2641 protein OS=Listeria monocytogenes GN=lmo2641 - [Q8Y433_LISMO]	0	1.68669e+08	0	0	0	0	>							9.39843	12.58	2	3																	326	36.7369	7.53271
Q8Y6X7	Delta-aminolevulinic acid dehydratase OS=Listeria monocytogenes GN=hemB - [Q8Y6X7_LISMO]	157758324	0	5.07958e+07	0	0	0				5.22324	7.1	2	2					8.2851	12.35	3	3													324	36.2314	5.38916
Q8Y3L2	Lmo2823 protein OS=Listeria monocytogenes GN=lmo2823 - [Q8Y3L2_LISMO]	0	3.61627e+08	0	0	0	0	>							6.87781	10.17	2	2																	413	46.6376	4.81787
Q8Y6Y0	FolC protein OS=Listeria monocytogenes GN=folC - [Q8Y6Y0_LISMO]	0	4.35292e+08	0	0	0	1.41585e+08	>		>					5.25996	8.39	2	2													5.31304	7.93	2	2	429	47.6617	5.49072
Q8Y8G3	Lmo0941 protein OS=Listeria monocytogenes GN=lmo0941 - [Q8Y8G3_LISMO]	0	3.67175e+08	0	2.81302e+08	4.38025e+07	1.77228e+08	>	>	4.04606					6.57212	8.95	2	2					5.18717	7.72	2	2	6.03277	8.95	2	2	6.43126	8.95	2	2	324	37.5195	4.75439
Q8Y3R6	Lmo2767 protein OS=Listeria monocytogenes GN=lmo2767 - [Q8Y3R6_LISMO]	0	372519142	0	0	0	0	>							9.65116	12.27	2	3																	220	24.4084	9.48096
Q8Y6V5	Lmo1576 protein OS=Listeria monocytogenes GN=lmo1576 - [Q8Y6V5_LISMO]	0	8.44323e+07	0	0	0	0	>							6.1486	8.92	2	2																	437	48.6766	6.46826
Q8Y6K3	5-methyltetrahydropteroyltriglutamate--homocysteine methyltransferase OS=Listeria monocytogenes GN=metE - [METE_LISMO]	2.87683e+08	0	5.17028e+07	0	2.87654e+07	0				16.1255	9.28	4	5					5.62014	3.4	2	2					11.2787	6.93	3	4					765	86.1816	5.05908
Q8Y4I4	2,3-bisphosphoglycerate-independent phosphoglycerate mutase OS=Listeria monocytogenes GN=gpmI - [GPMI_LISMO]	0	2.29806e+08	0	0	0	0	>							7.39214	7.25	2	2																	510	56.1045	5.24951
Q8Y4L8	Methionine import ATP-binding protein MetN 2 OS=Listeria monocytogenes GN=metN2 - [METN2_LISMO]	0	8484670901	0	0	0	5.91182e+07	>		>					6.93603	9.12	2	2													7.89563	11.76	3	3	340	38.0202	6.07471
Q8Y841	Lmo1077 protein OS=Listeria monocytogenes GN=lmo1077 - [Q8Y841_LISMO]	6.7082e+08	7.87838e+08	0	2.23478e+08	0	1.79688e+08	1.17444	>	>	5.32743	3.38	2	2	4.44962	3.38	2	2					10.5313	8.01	3	3					4.96748	3.56	2	2	562	65.5514	6.354
Q8Y647	Lmo1853 protein OS=Listeria monocytogenes GN=lmo1853 - [Q8Y647_LISMO]	0	3.31387e+08	3.9417e+07	1.55214e+08	0	0	>	3.93774						8.67199	9.63	3	3	5.48069	4.34	2	2	17.6694	6.11	3	6									737	79.8888	5.37646
Q8Y446	30S ribosomal protein S5 OS=Listeria monocytogenes GN=rpsE - [RS5_LISMO]	0	0	0	179059878	0	0		>														5.01476	11.38	2	2									167	17.4455	9.43701
Q8YAU5	Beta-glucosidase OS=Listeria monocytogenes GN=lmo0018 - [Q8YAU5_LISMO]	2.12783e+08	1.81236e+08	3.46391e+07	1.12147e+08	1.97373e+07	5.86816e+07	0.851741	3.23758	2.97313	9.49216	11.11	3	3	19.876	11.11	3	6	6.58449	7.76	2	2	7.87108	11.11	3	3	6.6342	7.76	2	2	12.1151	11.11	3	4	477	54.8647	5.2876
Q8Y6W4	CitZ protein OS=Listeria monocytogenes GN=citZ - [Q8Y6W4_LISMO]	0	2.58065e+08	0	0	0	1.64039e+08	>		>					5.49937	10.99	2	2													9.75855	10.99	2	3	373	42.5296	5.71924
Q8Y6Q3	Anthranilate phosphoribosyltransferase OS=Listeria monocytogenes GN=trpD - [TRPD_LISMO]	0	924965944	0	0	0	8.68368e+07	>		>					4.9777	8.26	2	2													4.43852	5.31	2	2	339	36.5728	5.09717
Q92EP8	UPF0365 protein lmo0392 OS=Listeria monocytogenes GN=lmo0392 - [Y392_LISMO]	0	0	0	6.49578e+07	0	5.36222e+07		>	>													5.70191	10.83	2	2					7.01128	10.83	2	2	314	33.6449	5.04639
Q8Y3M4	tRNA modification GTPase mnmE OS=Listeria monocytogenes GN=mnmE - [MNME_LISMO]	1.70848e+08	0	0	0	0	0				6.46578	6.56	2	2																					457	50.3833	4.67822
Q8Y7L9	Lmo1255 protein OS=Listeria monocytogenes GN=lmo1255 - [Q8Y7L9_LISMO]	3.95601e+08	6.62303e+08	2.18242e+08	5.24484e+08	9.6829e+07	3.29232e+08	1.67417	2.40323	3.40014	6.67577	5.87	2	2	17.0659	10.53	3	5	7.09025	5.87	2	2	9.67102	10.53	3	3	6.19292	5.87	2	2	8.76931	10.53	3	3	494	53.4565	6.80029
Q8Y6E2	Lmo1745 protein OS=Listeria monocytogenes GN=lmo1745 - [Q8Y6E2_LISMO]	0	1.0431e+09	0	539106849	0	5.17932e+08	>	>	>					9.97839	5.33	2	3					10.3859	5.33	2	3					6.183	5.33	2	2	225	26.3975	4.90674
Q8Y5I7	Probable O-sialoglycoprotein endopeptidase OS=Listeria monocytogenes GN=gcp - [GCP_LISMO]	0	4.36825e+08	0	2.02812e+08	0	0	>	>						5.24812	9.88	2	2					5.29957	9.88	2	2									344	36.837	5.17334
Q8Y3Y8	Lmo2691 protein OS=Listeria monocytogenes GN=lmo2691 - [Q8Y3Y8_LISMO]	1.98289e+07	5.4692e+07	0	1.49719e+07	0	0	2.75819	>		9.4031	9.83	2	3	10.1799	9.83	2	3					6.14682	9.83	2	2									590	63.5343	9.72998
Q8Y8D3	Ribose-5-phosphate isomerase A OS=Listeria monocytogenes GN=rpiA - [RPIA_LISMO]	0	0	0	1.70693e+08	0	0		>														5.49106	9.82	2	2									224	24.7949	5.33838
Q8Y7A9	Membrane protein oxaA 2 OS=Listeria monocytogenes GN=oxaA2 - [OXAA2_LISMO]	0	0	0	0	0	4.7046e+07			>																					5.97513	9.82	2	2	275	30.9063	9.18799
Q8Y8W8	Lmo0774 protein OS=Listeria monocytogenes GN=lmo0774 - [Q8Y8W8_LISMO]	0	1.77034e+08	0	0	0	4.61253e+07	>		>					5.43059	9.71	2	2													8.56569	9.71	2	3	309	33.4026	5.61768
Q8Y3J3	Lmo2842 protein OS=Listeria monocytogenes GN=lmo2842 - [Q8Y3J3_LISMO]	0	2.36992e+08	0	0	0	0	>							10.0773	9.68	2	3																	341	38.0527	6.80029
Q8Y551	Fumarate hydratase class II OS=Listeria monocytogenes GN=fumC - [FUMC_LISMO]	2.50369e+08	3.55257e+08	0	0	0	0	1.41893			8.43387	7.03	2	3	10.2846	7.03	2	4																	455	49.5944	5.71924
Q8Y8V7	Lmo0785 protein OS=Listeria monocytogenes GN=manR - [Q8Y8V7_LISMO]	0	1.02009e+08	0	9.86882e+07	0	1.60097e+07	>	>	>					8.04255	3.52	2	2					14.8088	7.68	4	4					13.6493	6.18	3	4	938	106.395	5.19873
Q8Y7G1	DNA polymerase III polC-type OS=Listeria monocytogenes GN=polC - [DPO3_LISMO]	233985412	1.82237e+08	4.13676e+07	1.74448e+07	1.94868e+07	0	0.778838	0.421702		18.7314	6.16	5	6	15.5302	5.61	5	5	13.0134	4.64	4	5	7.4963	3.74	3	3	9.79925	2.22	2	3					1444	162.629	5.43994
Q8Y6F0	Lmo1737 protein OS=Listeria monocytogenes GN=lmo1737 - [Q8Y6F0_LISMO]	4.65429e+08	1.0412e+09	1.45486e+08	610271600	8.91423e+07	3.34308e+08	2.23707	4.1947	3.75028	10.2292	6.79	2	3	9.27394	6.79	2	3	13.8759	6.79	2	4	9.35453	6.79	2	3	16.9792	9.24	3	6	9.15508	9.24	3	3	368	40.4167	5.14795
Q8YAV6	DNA gyrase subunit A OS=Listeria monocytogenes GN=gyrA - [Q8YAV6_LISMO]	0	0	4.78102e+07	0	0	0												4.91981	4.63	2	2													842	94.684	5.41455
P58414	Probable cadmium-transporting ATPase OS=Listeria monocytogenes GN=cadA - [CADA1_LISMO]	0	93662698	0	0	0	0	>							6.96164	9.05	2	2																	707	76.4294	5.52881
Q8Y5I3	Lmo2079 protein OS=Listeria monocytogenes GN=lmo2079 - [Q8Y5I3_LISMO]	0	1.47471e+08	0	0	0	0	>							11.0561	8.92	2	3																	381	41.7632	4.91943
Q8Y6G5	Lmo1722 protein OS=Listeria monocytogenes GN=lmo1722 - [Q8Y6G5_LISMO]	0	0	0	0	2.51848e+07	0																				5.35716	6.35	2	2					441	50.0849	9.70068
Q8Y7J8	ATP-dependent protease ATPase subunit HslU OS=Listeria monocytogenes GN=hslU - [HSLU_LISMO]	0	238998834	0	0	0	0	>							7.19085	6.4	2	2																	469	53.193	5.71924
P47762	DNA primase OS=Listeria monocytogenes GN=dnaG - [PRIM_LISMO]	0	1.78009e+08	0	0	0	1.04257e+10	>		>					4.72445	3.51	2	2													4.73577	5.11	2	2	626	71.7107	5.19873
Q8Y8C6	Lmo0982 protein OS=Listeria monocytogenes GN=lmo0982 - [Q8Y8C6_LISMO]	0	275963574	0	0	6.46695e+07	6.80665e+07	>		1.05253					6.38286	8.57	2	2									6.08182	8.57	2	2	5.39053	8.57	2	2	350	38.6497	6.06201
P52331	RNA polymerase sigma factor rpoD OS=Listeria monocytogenes GN=rpoD - [RPOD_LISMO]	0	2.22431e+08	0	0	0	0	>							6.26419	8.56	2	2																	374	42.3929	4.86865
P67195	Putative phosphotransferase lmo1457 OS=Listeria monocytogenes GN=lmo1457 - [Y1457_LISMO]	0	7.39628e+08	0	0	0	0	>							5.42318	8.39	2	2																	274	30.4172	5.2876
Q8Y6H3	Lmo1713 protein OS=Listeria monocytogenes GN=lmo1713 - [Q8Y6H3_LISMO]	0	0	0	8.08439e+07	0	0		>														5.89871	8.18	2	2									330	34.9295	5.07178
Q8Y6P7	Lmo1637 protein OS=Listeria monocytogenes GN=lmo1637 - [Q8Y6P7_LISMO]	0	0	0	0	0	179828300			>																					7.1783	8.17	2	2	355	38.6012	5.77002
Q8Y5Z8	CCA-adding enzyme OS=Listeria monocytogenes GN=cca - [CCA_LISMO]	0	0	0	8.17185e+08	0	0		>														4.52923	8.14	2	2									393	44.9201	6.17627
Q8Y547	Lmo2229 protein OS=Listeria monocytogenes GN=lmo2229 - [Q8Y547_LISMO]	0	2.81079e+07	0	0	0	0	>							8.10648	8.12	2	2																	714	77.8064	6.771
Q8Y7N6	Ribonuclease PH OS=Listeria monocytogenes GN=rph - [RNPH_LISMO]	416948038	5.12048e+08	0	2.70248e+08	0	2.25462e+08	1.22809	>	>	4.68279	4.44	2	2	4.76156	7.66	2	2					4.69641	7.66	2	2					6.7079	8.06	3	3	248	26.6527	4.94482
Q8YAV0	AA3-600 quinol oxidase subunit II OS=Listeria monocytogenes GN=qoxA - [Q8YAV0_LISMO]	1.98359e+08	3.57346e+08	0	0	0	9.35082e+07	1.80152		>	9.08706	7.88	2	3	17.5904	7.88	2	5													6.91205	7.88	2	2	368	41.5582	6.46826
Q8Y3R7	Lmo2766 protein OS=Listeria monocytogenes GN=lmo2766 - [Q8Y3R7_LISMO]	0	7.94004e+07	0	0	0	0	>							6.09333	7.79	2	2																	244	28.3242	5.69385
Q8Y7N9	Aspartokinase OS=Listeria monocytogenes GN=lmo1235 - [Q8Y7N9_LISMO]	0	4.63036e+08	0	0	0	0	>							5.77028	7.67	2	2																	404	43.6227	5.16064
Q8Y510	ATP-dependent helicase/deoxyribonuclease subunit B OS=Listeria monocytogenes GN=addB - [ADDB_LISMO]	0	0	0	499389041	0	0		>														7.54611	4.24	2	2									1157	132.519	5.66846
Q8Y665	Carbamoyl-phosphate synthase large chain OS=Listeria monocytogenes GN=carB - [CARB_LISMO]	0	0	0	2.20666e+08	0	0		>														4.88651	2.43	2	2									1070	117.702	4.86865
Q8Y6S7	Lmo1606 protein OS=Listeria monocytogenes GN=lmo1606 - [Q8Y6S7_LISMO]	0	4.81431e+07	0	0	0	0	>							7.30348	4.73	3	3																	783	87.7393	5.42725
Q8Y703	Lmo1527 protein OS=Listeria monocytogenes GN=lmo1527 - [Q8Y703_LISMO]	0	2.03454e+08	0	0	1.20633e+07	0	>							8.9043	5.97	3	3									6.18597	3.98	2	2					754	82.5625	9.34912
Q8Y5V3	Diaminopimelate decarboxylase OS=Listeria monocytogenes GN=lysA - [Q8Y5V3_LISMO]	0	75608805	0	0	0	0	>							8.43038	5.96	2	3																	436	47.9532	4.98291
Q8Y6C2	Amidophosphoribosyltransferase OS=Listeria monocytogenes GN=purF - [Q8Y6C2_LISMO]	1.5143e+08	0	0	0	0	0				5.46078	5.89	2	2																					475	52.1695	5.40186
Q48759	Putative ATP:guanido phosphotransferase lmo0231 OS=Listeria monocytogenes GN=lmo0231 - [Y231_LISMO]	0	3.63981e+08	0	0	0	0	>							4.88442	5.59	2	2																	340	38.83	5.08447
Q8Y9B6	C-terminal domain similar to glycerophosphoryl diester phosphodiesterase OS=Listeria monocytogenes GN=lmo0616 - [Q8Y9B6_LISMO]	676583719	0	0	0	0	0				6.72791	5.32	2	3																					583	66.5085	9.18799
Q8Y9E6	Lmo0584 protein OS=Listeria monocytogenes GN=lmo0584 - [Q8Y9E6_LISMO]	0	2.94651e+08	0	184164974	0	0	>	>						5.21209	5.13	2	2					5.00447	3.08	2	2									390	43.3673	9.20264
Q8Y7A3	DNA translocase ftsK OS=Listeria monocytogenes GN=ftsK - [FTSK_LISMO]	0	0	0	0	0	1.14258e+08			>																					7.70166	4.1	2	2	757	83.4984	7.41553
Q8Y7P1	MutS2 protein OS=Listeria monocytogenes GN=mutS2 - [MUTS2_LISMO]	0	2.18214e+08	0	1.1078e+08	0	0	>	>						7.63002	4.2	2	2					6.40158	4.2	2	2									785	86.6627	5.89697
Q8Y6V7	DnaE protein OS=Listeria monocytogenes GN=dnaE - [Q8Y6V7_LISMO]	0	1.58944e+08	0	0	0	0	>							7.87171	2.89	2	2																	1108	124.981	6.12549
Q8Y7B5	Dihydrolipoyl dehydrogenase OS=Listeria monocytogenes GN=lmo1371 - [Q8Y7B5_LISMO]	3.68322e+07	0	0	0	0	0				4.8972	3.58	2	2																					475	50.9414	5.63037
Q8Y511	ATP-dependent helicase/nuclease subunit A OS=Listeria monocytogenes GN=addA - [ADDA_LISMO]	0	0	0	0	0	1.66647e+08			>																					6.14751	3.24	2	2	1235	142.566	5.10986
Q8Y6P0	Lmo1644 protein OS=Listeria monocytogenes GN=lmo1644 - [Q8Y6P0_LISMO]	0	4.91075e+07	0	0	0	0	>							11.4044	3.08	2	3																	1072	123.961	5.22412
Q8Y839	Lmo1079 protein OS=Listeria monocytogenes GN=lmo1079 - [Q8Y839_LISMO]	0	0	0	0	0	8.05516e+07			>																					6.67945	2.63	2	2	952	108.824	9.18799

## Sheet: S10
Accession	Description	DMSO (1) A5: Area	S10 (1) C5: Area	DMSO (2) E5: Area	S10 (2) G5: Area	DMSO (3) I5: Area	S10 (3) K5: Area	S10/DMSO (1)	S10/DMSO (2)	S10/DMSO (3)	Score A2	Coverage A2	# Peptides A2	# PSM A2	Score C2	Coverage C2	# Peptides C2	# PSM C2	Score E2	Coverage E2	# Peptides E2	# PSM E2	Score G2	Coverage G2	# Peptides G2	# PSM G2	Score I2	Coverage I2	# Peptides I2	# PSM I2	Score K2	Coverage K2	# Peptides K2	# PSM K2	# AAs	MW [kDa]	calc. pI
Q8Y422	Elongation factor Tu OS=Listeria monocytogenes GN=tuf - [EFTU_LISMO]	5.59494e+10	5.94581e+10	1.2669e+10	3.29085e+10	3.08511e+09	1.87021e+10	1.06271	2.59756	6.06204	536.904	70.38	28	171	690.448	66.58	26	208	523.526	64.56	23	168	1248.51	75.44	30	352	659.518	70.38	26	208	619.113	66.58	25	195	395	43.3148	4.91943
Q8Y4M2	Lmo2415 protein OS=Listeria monocytogenes GN=lmo2415 - [Q8Y4M2_LISMO]	7.26953e+09	8.93435e+09	1.90187e+09	9.26197e+09	3.10859e+08	2.63159e+09	1.22901	4.86994	8.46554	130.5	64.37	12	36	256.68	64.37	11	68	156.266	47.89	10	43	420.289	68.58	12	103	103.166	53.64	9	26	303.502	68.58	13	75	261	29.1357	4.62744
Q8Y6M7	Elongation factor Ts OS=Listeria monocytogenes GN=tsf - [EFTS_LISMO]	14423908991	1.73748e+10	4.26239e+09	1.41109e+10	2.28071e+09	6.47666e+09	1.20458	3.31055	2.83975	194.365	83.33	24	60	299.136	84.01	26	87	290.084	75.17	21	87	307.049	84.01	23	93	175.808	77.89	22	51	240.357	83.33	25	74	294	32.6177	5.19873
Q8Y6M6	30S ribosomal protein S2 OS=Listeria monocytogenes GN=rpsB - [RS2_LISMO]	2.98109e+09	7.65885e+09	1.55421e+09	7.84495e+09	1.86144e+08	3.51392e+09	2.56914	5.04755	18.8774	37.8811	65.06	11	13	135.317	53.82	11	47	35.5684	49	10	13	113.272	77.11	15	40	35.3842	42.57	6	10	121.375	55.42	11	40	249	28.3569	6.18896
Q8Y859	Lmo1059 protein OS=Listeria monocytogenes GN=lmo1059 - [Q8Y859_LISMO]	7.50842e+08	5.6236e+10	5.25506e+07	3.12788e+10	8.54873e+07	1.14697e+10	74.8972	595.214	134.168	18.3329	48.3	4	5	549.365	81.82	16	130	18.874	35.23	3	5	940.381	81.82	15	220	18.4261	48.3	4	5	678.768	78.98	15	162	176	19.9151	4.89404
Q9RQI6	ATP-dependent Clp protease proteolytic subunit OS=Listeria monocytogenes GN=clpP - [CLPP_LISMO]	0	9.3979e+08	0	8.46487e+08	0	3.50022e+08	>	>	>					32.6102	52.53	5	8					22.1982	51.52	4	6					28.7004	47.47	4	8	198	21.605	5.10986
Q8Y5G2	Pyridoxal biosynthesis lyase pdxS OS=Listeria monocytogenes GN=pdxS - [PDXS_LISMO]	1.50176e+09	3.72471e+09	5.50592e+08	4104548966	4.87958e+08	1.66906e+09	2.48022	7.4548	3.4205	25.5748	42.37	8	8	43.7975	46.78	8	12	27.5755	24.07	4	8	116.797	64.75	12	31	32.0952	34.24	8	10	43.4211	56.27	9	12	295	31.7002	5.47803
Q8Y4I1	Gap protein OS=Listeria monocytogenes GN=gap - [Q8Y4I1_LISMO]	1.07713e+10	1.31448e+10	4.18044e+09	1.05263e+10	2.1634e+09	4.50889e+09	1.22036	2.51798	2.08417	138.967	65.77	17	31	134.221	66.07	18	29	192.946	61.01	18	45	261.523	73.51	17	62	144.781	60.71	16	33	145.722	62.8	16	33	336	36.2636	5.36377
Q8Y683	Lmo1814 protein OS=Listeria monocytogenes GN=lmo1814 - [Q8Y683_LISMO]	5.26377e+08	3.98111e+09	1.10444e+08	2.17006e+09	8.79206e+07	1.04714e+09	7.56323	19.6484	11.91	23.7847	20.83	6	7	155.257	78.26	25	41	18.5547	19.57	5	6	137.472	64.67	22	38	12.0712	13.41	4	4	109.023	73.01	24	30	552	59.3169	4.62744
Q8Y863	PdhC protein OS=Listeria monocytogenes GN=pdhC - [Q8Y863_LISMO]	9.33023e+09	1.11936e+10	3.70055e+09	1.24057e+10	1.70556e+09	2.83705e+09	1.19971	3.35239	1.66341	151.787	69.12	23	42	153.367	63.79	20	39	180.939	69.67	22	48	227.981	74.63	23	60	146.969	71.32	23	40	131.48	68.75	20	36	544	58.1586	4.85596
Q8YAR9	30S ribosomal protein S6 OS=Listeria monocytogenes GN=rpsF - [RS6_LISMO]	0	2.37662e+09	0	9.52958e+08	0	9.39378e+08	>	>	>					40.5127	76.29	6	11					31.7531	73.2	5	9					26.631	55.67	4	7	97	11.4999	5.18604
Q926Y9	Inosine-5'-monophosphate dehydrogenase OS=Listeria monocytogenes GN=guaB - [Q926Y9_LISMO]	1.26251e+10	1.58267e+10	4.20288e+09	9.23299e+09	2.08522e+09	4.32734e+09	1.25359	2.19683	2.07525	136.516	66.39	25	40	226.235	70.9	26	69	146.568	56.76	19	42	442.965	72.34	26	126	89.2395	56.76	21	28	210.617	65.78	24	65	488	52.5226	6.49365
Q8Y5W9	Glycerol-3-phosphate dehydrogenase [NAD(P)+] OS=Listeria monocytogenes GN=gpsA - [GPDA_LISMO]	8.18373e+08	3.90327e+09	2.79873e+08	1694868910	1.47475e+08	1.20096e+09	4.76955	6.05585	8.14347	37.8549	52.07	10	13	81.0554	53.25	13	23	34.5491	40.83	8	12	106.428	73.96	14	32	20.2252	23.67	6	7	49.8793	43.49	10	15	338	36.474	5.46533
Q9S5A4	Chaperone protein DnaK OS=Listeria monocytogenes GN=dnaK - [DNAK_LISMO]	1.11999e+09	8.54557e+09	2.18481e+08	5.02908e+09	1.95756e+08	2.48224e+09	7.63004	23.0184	12.6803	50.9807	37.03	14	15	334.45	68.52	28	87	62.8344	35.24	13	20	318.895	60.52	24	81	54.3713	34.26	11	16	331.862	59.22	26	84	613	66.1038	4.69092
Q8Y4I2	Phosphoglycerate kinase OS=Listeria monocytogenes GN=pgk - [PGK_LISMO]	3.06598e+09	7.01689e+09	2.12635e+09	3525841415	6.61378e+08	1.43859e+09	2.28863	1.65816	2.17515	52.8502	49.24	11	15	66.1214	56.06	13	19	92.318	51.26	12	26	119.02	62.88	15	31	65.7478	43.94	9	18	70.2575	50	11	19	396	42.078	5.09717
Q8Y4R1	Lmo2373 protein OS=Listeria monocytogenes GN=lmo2373 - [Q8Y4R1_LISMO]	2817456792	4.56984e+09	1.5183e+09	4.32327e+09	1.19288e+09	1.42944e+09	1.62197	2.84744	1.19831	10.5815	40.38	3	3	17.892	40.38	4	5	18.3616	40.38	3	5	15.9436	74.04	3	4	10.6709	40.38	3	3	15.6556	39.42	3	4	104	11.1828	4.84326
Q8Y421	Elongation factor G OS=Listeria monocytogenes GN=fusA - [EFG_LISMO]	1.711e+10	1.40376e+10	3.31007e+09	8.18739e+09	1.62021e+09	4.17284e+09	0.820433	2.47348	2.5755	510.452	57.27	30	135	384.249	51.65	25	102	484.542	53.24	26	130	506.538	65.9	33	135	413.967	50.22	26	111	422.911	50.94	24	115	695	76.8015	4.94482
Q8Y9H5	Lmo0553 protein OS=Listeria monocytogenes GN=lmo0553 - [Q8Y9H5_LISMO]	6.44846e+08	7.57231e+08	6.50594e+07	5.94253e+08	1.61488e+08	2.95243e+08	1.17428	9.134	1.82827	21.5415	31.75	4	7	28.9141	50.24	6	10	10.0987	25.59	3	4	25.8588	34.6	4	8	12.4106	14.69	2	4	29.3695	45.02	5	9	211	23.5466	7.48877
Q8Y4I3	Triosephosphate isomerase 1 OS=Listeria monocytogenes GN=tpiA1 - [TPIS1_LISMO]	6.08333e+09	3.78078e+09	9.23013e+08	4.0887e+09	1.47155e+08	1084889750	0.621499	4.42974	7.37244	41.6185	40.64	6	12	24.2418	30.68	5	7	22.8912	40.64	6	7	54.9143	62.55	7	15	23.0447	26.29	4	7	31.7672	30.68	5	9	251	26.8615	4.83057
Q8Y689	FabD protein OS=Listeria monocytogenes GN=fabD - [Q8Y689_LISMO]	854420910	1.43017e+09	2.84726e+08	7.04408e+08	1.88222e+08	3.65531e+08	1.67385	2.47398	1.94202	41.655	60.38	10	12	45.8645	59.74	11	13	34.2206	45.05	8	11	35.2713	43.45	8	10	18.3354	19.17	5	6	42.0506	54.95	10	13	313	32.9133	4.85596
Q9S389	D-alanine--poly(phosphoribitol) ligase subunit 2 OS=Listeria monocytogenes GN=dltC - [DLTC_LISMO]	0	2.45005e+08	0	4.25419e+08	0	4.76786e+07	>	>	>					33.2316	71.79	2	8					19.3757	71.79	2	5					24.4954	71.79	2	6	78	9.00456	3.95459
Q8Y971	ThiD protein OS=Listeria monocytogenes GN=thiD - [Q8Y971_LISMO]	2.33658e+09	4.67241e+09	8.27912e+08	4150005835	5.32075e+08	1.91482e+09	1.99968	5.01262	3.59877	24.1992	45.76	8	8	52.8992	61.62	11	15	23.854	32.47	6	8	43.7974	36.9	8	13	14.7313	21.4	4	5	24.0865	29.15	5	7	271	28.801	5.40186
Q8Y5T8	Uncharacterized protein Lmo1967 OS=Listeria monocytogenes GN=lmo1967 - [Y1967_LISMO]	0	2.83431e+09	0	2.32974e+09	0	1.12958e+09	>	>	>					100.335	66.17	16	29					108.796	59.65	14	32					83.7109	63.16	14	25	399	45.4636	5.42725
Q8Y8D5	Enoyl-[acyl-carrier-protein] reductase [NADH] OS=Listeria monocytogenes GN=lmo0970 - [Q8Y8D5_LISMO]	3.28611e+09	2.36467e+09	5.50542e+08	1.88159e+09	3.06214e+08	6.58095e+08	0.719597	3.41771	2.14914	39.7685	51.53	9	12	22.3507	48.47	7	7	30.4093	38.93	8	10	82.9475	65.65	12	24	32.1219	29.39	6	8	38.4289	56.11	8	10	262	28.2766	5.66846
Q928M6	Lmo2411 protein OS=Listeria monocytogenes GN=lmo2411 - [Q928M6_LISMO]	8.93287e+08	5.30176e+09	2.27826e+08	5.9054e+09	1.05602e+08	1.36478e+09	5.93511	25.9207	12.9239	34.4876	32.54	9	11	118.428	57.76	22	40	37.5992	25.22	8	10	199.166	64.87	27	67	28.4095	29.31	8	9	124.568	58.19	22	43	464	52.4829	4.91943
P0A4L3	Thioredoxin OS=Listeria monocytogenes GN=trxA - [THIO_LISMO]	2.06249e+09	4.8031e+10	7.23527e+08	3.47321e+10	3.79439e+08	1.17369e+10	23.2879	48.0038	30.9322	38.2368	49.51	8	10	128.318	68.93	11	38	44.8036	51.46	8	12	296.826	68.93	11	83	32.9296	49.51	6	9	277.067	68.93	11	80	103	11.6128	4.33545
Q8Y865	PdhA protein OS=Listeria monocytogenes GN=pdhA - [Q8Y865_LISMO]	1.51633e+09	2.67249e+09	5.50088e+08	2.19666e+09	2.60179e+08	9.88396e+08	1.76247	3.99328	3.79891	28.4948	31.81	7	8	29.0532	38.27	8	8	21.1551	33.15	6	6	72.731	53.37	11	18	15.7689	22.37	4	4	33.4037	32.08	7	9	371	41.2414	6.46826
Q8Y7B4	Lmo1372 protein OS=Listeria monocytogenes GN=lmo1372 - [Q8Y7B4_LISMO]	0	1.92383e+09	0	1.26653e+09	0	4.91266e+08	>	>	>					34.7137	45.62	7	9					20.7479	25.98	4	6					45.5823	45.62	7	12	331	36.3269	4.90674
Q8Y4C5	Mbl protein OS=Listeria monocytogenes GN=mbl - [Q8Y4C5_LISMO]	6.21201e+08	1.15409e+09	1.59226e+08	9.31914e+08	7.11957e+07	3.80946e+08	1.85784	5.85277	5.35069	50.6243	59.52	9	14	60.9957	62.84	10	16	29.5203	25.38	4	7	55.7056	55.29	8	15	33.8937	25.38	4	8	53.0894	55.29	8	14	331	35.6139	5.61768
Q927L9	50S ribosomal protein L5 OS=Listeria monocytogenes GN=rplE - [RL5_LISMO]	9.90024e+08	2.62388e+09	4.26214e+08	1.52792e+09	2.52387e+08	1.0381e+09	2.65032	3.58487	4.11314	18.3116	45.25	5	6	26.7049	57.54	9	9	8.58168	30.17	3	3	30.6675	53.07	8	10	11.6609	30.17	3	4	26.4689	57.54	8	9	179	19.9826	9.0415
Q8Y498	FbaA protein OS=Listeria monocytogenes GN=fbaA - [Q8Y498_LISMO]	4.08498e+10	41342726388	1.08661e+10	2.79259e+10	8.83998e+09	9.49601e+09	1.01207	2.57001	1.07421	94.2767	65.49	13	29	77.2341	59.15	13	24	219.776	55.63	11	68	312.874	63.73	14	88	118.192	53.87	11	36	112.266	53.52	10	32	284	30.0484	5.37646
Q8Y6R4	Lmo1620 protein OS=Listeria monocytogenes GN=lmo1620 - [Q8Y6R4_LISMO]	3.2135e+09	1.94733e+09	5.5301e+08	1.33308e+09	4.33374e+08	5.22329e+08	0.605984	2.41059	1.20526	77.9067	51.49	14	21	58.338	38.94	12	18	72.8552	44.68	11	20	49.9246	45.32	11	14	55.2621	39.79	10	15	42.8339	37.02	9	12	470	51.8171	5.07178
Q8Y701	Lmo1529 protein OS=Listeria monocytogenes GN=lmo1529 - [Q8Y701_LISMO]	3.92875e+08	5.61537e+08	1.23036e+08	5.77843e+08	3.4851e+07	1.34223e+08	1.4293	4.69654	3.85134	11.4509	55.05	3	3	12.9997	42.2	2	3	9.77931	42.2	2	2	17.302	42.2	2	4	19.1985	42.2	2	4	16.083	55.05	3	4	109	11.9504	6.06201
Q8Y7B0	6-phosphogluconate dehydrogenase, decarboxylating OS=Listeria monocytogenes GN=lmo1376 - [Q8Y7B0_LISMO]	2.18757e+09	3.42282e+09	4.03717e+08	3.12576e+09	3.92481e+08	5.44791e+08	1.56466	7.74246	1.38807	51.6761	35.17	10	17	63.9141	31.14	9	19	54.2951	23.31	5	18	83.5657	33.69	10	23	36.2582	23.52	6	14	73.8328	37.29	10	21	472	52.3827	5.21143
Q8Y8N0	Lmo0866 protein OS=Listeria monocytogenes GN=lmo0866 - [Q8Y8N0_LISMO]	5.38323e+09	3.10737e+09	1.89505e+09	2.58602e+09	1.24568e+09	9.9239e+08	0.577231	1.36462	0.796667	96.598	54.23	23	29	72.6311	43.27	17	22	96.9863	45.96	22	30	103.955	48.08	18	31	106.955	50.58	21	32	85.0395	49.42	19	25	520	57.2739	9.39307
Q8Y7L0	Trigger factor OS=Listeria monocytogenes GN=tig - [TIG_LISMO]	3.23614e+08	1.5542e+10	8.80457e+07	9366106386	5.34109e+07	3.90356e+09	48.0262	106.378	73.0853	27.013	21.78	5	8	161.924	59.72	22	47	9.39098	11.71	3	3	169.473	44.5	19	51	19.644	21.78	5	6	188.437	57.61	21	55	427	47.8242	4.56396
Q8Y6V1	Lmo1580 protein OS=Listeria monocytogenes GN=lmo1580 - [Q8Y6V1_LISMO]	1.61186e+09	2.33432e+09	4.08035e+08	1.40842e+09	2.07068e+08	6.32474e+08	1.44822	3.45171	3.05443	34.4112	55.84	6	9	46.1711	55.84	7	12	65.1457	55.84	7	16	53.4426	55.84	7	14	44.0213	55.84	7	11	58.7792	55.84	7	15	154	16.8566	5.09717
Q8Y9J4	UPF0237 protein lmo0533 OS=Listeria monocytogenes GN=lmo0533 - [Y533_LISMO]	3.40757e+08	3.12755e+08	4.09187e+07	2.11325e+08	2.7609e+07	0	0.917824	5.16452		13.0241	51.69	4	4	12.1498	49.44	4	4	9.21049	34.83	3	3	9.66396	51.69	3	3	10.0531	51.69	3	3					89	9.93606	5.12256
Q8Y846	PycA protein OS=Listeria monocytogenes GN=pycA - [Q8Y846_LISMO]	4.58512e+10	1.9689e+10	1.90897e+10	1.6041e+10	8.39627e+09	4.96885e+09	0.42941	0.840298	0.591793	560.853	58.9	56	171	247.823	50.79	37	74	1344.76	59.77	50	415	385.956	57.68	47	119	1215.35	57.42	49	366	316.807	50.96	40	95	1146	127.969	5.5542
P66042	50S ribosomal protein L10 OS=Listeria monocytogenes GN=rplJ - [RL10_LISMO]	3.4859e+09	3.79512e+09	1.05815e+09	2.79375e+09	2.50547e+08	1.12848e+09	1.08871	2.64021	4.50405	32.046	62.65	5	7	26.8812	53.61	3	6	37.2454	62.65	5	9	81.8784	62.65	7	20	24.061	59.64	4	7	26.1905	62.65	6	7	166	17.6824	5.42725
Q8Y7H4	Tkt protein OS=Listeria monocytogenes GN=tkt - [Q8Y7H4_LISMO]	4.685e+09	4.12455e+09	2.18047e+09	3.40136e+09	8.43812e+08	1.43358e+09	0.880374	1.55992	1.69894	177.21	55.57	25	49	120.918	48.34	23	34	139.007	52.41	23	41	110.346	36.75	21	34	96.7167	49.7	22	31	124.494	46.23	23	37	664	71.7812	5.2876
Q8Y6V4	UPF0173 metal-dependent hydrolase lmo1577 OS=Listeria monocytogenes GN=lmo1577 - [Y1577_LISMO]	8.65285e+08	1054073841	1.8733e+08	5.54057e+08	1.43636e+08	1.74073e+08	1.21818	2.95765	1.2119	33.4988	58.33	6	10	29.7358	37.72	4	8	12.589	37.72	4	4	22.5497	29.39	3	6	12.286	17.54	3	4	19.46	29.39	3	5	228	24.6324	4.98291
P66611	30S ribosomal protein S7 OS=Listeria monocytogenes GN=rpsG - [RS7_LISMO]	8.5156e+07	3.55377e+09	2.57875e+07	1.98209e+09	0	7.82698e+08	41.7324	76.8627	>	18.9622	26.28	2	5	50.4667	51.92	5	15	6.14497	26.28	2	2	56.3759	51.92	5	16					34.5327	53.85	6	10	156	17.8054	10.1694
Q8Y690	FabG protein OS=Listeria monocytogenes GN=fabG - [Q8Y690_LISMO]	992722836	1.73101e+09	6.95254e+08	1.36601e+09	1.57033e+08	4.43215e+08	1.7437	1.96476	2.82243	16.0607	35.63	5	5	19.8798	38.06	5	5	18.597	38.06	5	5	31.9268	52.63	7	9	21.4663	28.74	4	5	28.9368	28.74	4	7	247	26.2315	5.51611
O31149	Phosphoenolpyruvate-protein phosphotransferase OS=Listeria monocytogenes GN=ptsI - [PT1_LISMO]	3997476912	7498423620	1.6679e+09	5.86997e+09	5.63756e+08	1.49959e+09	1.87579	3.51937	2.66	85.0886	36.19	15	23	99.2479	36.54	17	27	70.4485	31.47	14	22	113.19	44.93	21	35	61.5153	23.6	13	19	87.6365	42.13	19	25	572	63.1724	4.80518
Q8Y5F0	Lmo2114 protein OS=Listeria monocytogenes GN=lmo2114 - [Q8Y5F0_LISMO]	2.43958e+08	3.94705e+08	1.77619e+08	4.28441e+08	5.99139e+07	2.56169e+08	1.61793	2.41213	4.27562	30.8092	50.98	6	8	32.0347	50.98	6	8	15.2716	35.69	4	4	32.6946	50.2	6	9	17.3921	31.37	3	4	22.8074	43.14	5	6	255	28.2958	5.42725
Q8YA72	Lmo0287 protein OS=Listeria monocytogenes GN=lmo0287 - [Q8YA72_LISMO]	1.20406e+09	807167391	2.08045e+08	1.14648e+09	1.17438e+08	2.90634e+08	0.67037	5.51073	2.47479	28.0704	36.71	6	9	26.632	52.74	7	7	14.2397	17.72	4	4	48.8901	57.81	8	12	15.8806	26.58	4	5	14.8393	17.72	4	5	237	27.2719	5.05908
Q8Y6D3	Aspartyl/glutamyl-tRNA(Asn/Gln) amidotransferase subunit B OS=Listeria monocytogenes GN=gatB - [GATB_LISMO]	2.53278e+09	3.00463e+09	1.15193e+09	3.11877e+09	3.63129e+08	8.81202e+08	1.1863	2.70744	2.42669	76.0457	43.07	15	21	81.2576	47.69	16	23	57.0311	41.81	14	18	77.3386	46.43	13	22	55.658	36.97	13	17	73.7875	42.65	13	22	476	53.2032	5.36377
Q8Y6W1	Pyruvate kinase OS=Listeria monocytogenes GN=pykA - [Q8Y6W1_LISMO]	2.88205e+09	1985167962	5.01174e+08	1.71511e+09	3.33051e+08	7.09563e+08	0.688804	3.4222	2.13049	81.7287	47.69	19	26	54.4306	33.5	12	17	57.3467	34.02	14	17	61.1054	37.95	15	18	62.9854	36.41	14	19	52.338	25.3	10	16	585	62.559	5.5542
Q8Y4B2	Serine hydroxymethyltransferase OS=Listeria monocytogenes GN=glyA - [GLYA_LISMO]	3.17278e+09	2305799174	1.14153e+09	2882592866	5.04136e+08	6.24782e+08	0.726743	2.5252	1.23931	88.4604	53.27	15	25	54.8819	43.58	12	17	93.4941	53.03	14	27	88.154	49.15	12	22	65.1179	38.01	10	18	38.631	39.23	9	11	413	45.0943	5.80811
Q8Y6T3	Catabolite control protein A OS=Listeria monocytogenes GN=ccpA - [Q8Y6T3_LISMO]	0	6.0317e+08	0	4.86251e+08	0	1.72111e+08	>	>	>					52.7149	48.96	9	15					31.087	37.61	8	10					32.7718	39.1	6	10	335	36.9603	5.40186
Q8Y7Y1	ATP-dependent Clp protease proteolytic subunit 1 OS=Listeria monocytogenes GN=clpP1 - [Q8Y7Y1_LISMO]	0	3.50223e+08	0	762338058	0	1.99584e+08	>	>	>					11.9079	31.05	3	3					12.911	25.26	2	3					10.5096	31.05	3	3	190	21.334	5.05908
Q8Y573	3-oxoacyl-[acyl-carrier-protein] synthase 3 OS=Listeria monocytogenes GN=fabH - [FABH_LISMO]	0	4.70763e+09	0	2.81056e+09	0	2.21064e+09	>	>	>					58.6076	34.94	5	16					58.7279	46.79	7	17					62.9088	54.49	10	19	312	33.9495	5.21143
Q8Y8V6	FMN-dependent NADH-azoreductase 2 OS=Listeria monocytogenes GN=azoR2 - [AZOR2_LISMO]	0	6.84847e+08	0	3.51377e+08	0	0	>	>						22.8918	41.23	5	6					9.32464	39.81	3	3									211	23.0811	5.40186
Q8YAJ0	Lmo0135 protein OS=Listeria monocytogenes GN=lmo0135 - [Q8YAJ0_LISMO]	2.04949e+08	1.24689e+09	52149800	2.19937e+09	0	5.07365e+08	6.0839	42.174	>	18.1814	15.46	4	5	40.6004	35.31	10	12	6.90155	7.25	2	2	40.5253	31.87	8	12					55.4593	33.78	9	16	524	58.2506	5.19873
Q8Y8G1	DNA protection during starvation protein OS=Listeria monocytogenes GN=dps - [DPS_LISMO]	7.36913e+08	7.38144e+08	1.38022e+08	6.61064e+08	1.03899e+08	2.92346e+08	1.00167	4.78954	2.81376	9.00933	26.92	3	3	8.35278	26.92	3	3	8.16288	35.9	3	3	15.496	46.79	4	5	8.39342	26.92	3	3	9.27968	41.03	3	3	156	18.0359	4.93213
Q8Y7K1	Methylenetetrahydrofolate--tRNA-(uracil-5-)-methyltransferase TrmFO OS=Listeria monocytogenes GN=trmFO - [TRMFO_LISMO]	7.28888e+08	1.35794e+09	1.21516e+08	1.02625e+09	8.82096e+07	2.36617e+08	1.86303	8.44537	2.68244	39.654	29.49	6	9	84.9438	40.09	9	18	11.9135	15.44	3	3	86.4592	35.02	9	18	20.0091	22.35	6	7	59.4898	26.96	8	16	434	47.8685	5.46533
Q8Y3L1	Lmo2824 protein OS=Listeria monocytogenes GN=lmo2824 - [Q8Y3L1_LISMO]	8.8475e+08	1.24642e+09	3.99903e+08	1089444193	1.66708e+08	4.03364e+08	1.40878	2.72427	2.41959	58.0483	50.63	14	18	50.2984	50.38	13	16	50.5292	45.06	11	15	48.699	43.29	12	15	28.1653	29.62	7	9	49.7842	45.82	12	15	395	43.1664	5.14795
Q8Y6V0	Acetate kinase 1 OS=Listeria monocytogenes GN=ackA1 - [ACKA1_LISMO]	4.27603e+09	2.12919e+09	1069230876	3087192644	3.80006e+08	7.62679e+08	0.497936	2.8873	2.00702	68.9672	52.39	16	23	45.4206	40.05	11	14	63.8203	39.55	10	21	51.8051	48.61	14	16	45.6408	25.44	7	13	57.7297	38.04	11	17	397	43.8216	5.50342
Q8Y850	Lmo1068 protein OS=Listeria monocytogenes GN=lmo1068 - [Q8Y850_LISMO]	0	9.76315e+08	0	7.61129e+08	0	336318432	>	>	>					43.3239	53.15	10	12					20.4476	34.27	6	6					28.0037	42.31	7	8	286	30.7683	6.15088
Q8Y7F6	Translation initiation factor IF-2 OS=Listeria monocytogenes GN=infB - [IF2_LISMO]	1.19565e+09	2.04043e+09	8.01288e+08	1.86348e+09	1.93568e+08	8.0841e+08	1.70653	2.32561	4.17635	84.9262	46.73	20	26	96.4343	40.31	17	29	79.9117	30.3	15	24	117.571	45.19	20	34	78.8623	41.72	18	25	75.0009	35.69	17	24	779	84.5239	6.3667
Q8Y445	50S ribosomal protein L18 OS=Listeria monocytogenes GN=rplR - [RL18_LISMO]	0	0	0	0	0	5.22191e+07			>																					8.4143	31.09	2	2	119	13.088	10.0962
Q8Y3S3	UPF0189 protein lmo2759 OS=Listeria monocytogenes GN=lmo2759 - [Y2759_LISMO]	8.64733e+08	1.09938e+09	1.85821e+08	8.44343e+08	8.49951e+07	2.56554e+08	1.27136	4.54385	3.01846	33.1874	57.95	6	8	49.5005	57.95	6	10	42.3354	46.59	4	9	35.7079	53.98	5	8	20.9541	46.59	4	5	22.8387	53.98	5	6	176	18.9727	4.83057
Q8Y4N8	Lmo2397 protein OS=Listeria monocytogenes GN=lmo2397 - [Q8Y4N8_LISMO]	0	3.55272e+08	0	0	0	0	>							7.91635	57.69	3	3																	78	8.73656	4.80518
P66054	50S ribosomal protein L11 OS=Listeria monocytogenes GN=rplK - [RL11_LISMO]	8.26174e+08	3.89837e+09	1.18568e+09	2.39887e+09	4.76192e+08	2.62748e+08	4.71859	2.02321	0.551768	19.2837	45.39	4	5	30.0255	56.74	6	8	31.2154	51.06	5	8	81.7721	56.74	8	25	19.8079	46.1	4	5	23.7054	44.68	4	7	141	14.8509	9.45166
Q8Y4S4	Lmo2358 protein OS=Listeria monocytogenes GN=lmo2358 - [Q8Y4S4_LISMO]	3.04088e+08	5.78882e+08	1.60954e+08	3.18173e+08	7.78392e+07	1.646e+08	1.90367	1.97679	2.11462	14.8157	31.69	5	5	21.7694	41.15	6	6	14.9901	24.28	4	5	23.2925	42.8	6	7	12.9729	21.4	3	4	20.6389	34.57	5	6	243	26.9586	4.80518
Q8Y6L1	MenB protein OS=Listeria monocytogenes GN=menB - [Q8Y6L1_LISMO]	2.51135e+09	4.91186e+09	5.7826e+08	2.40974e+09	2.92681e+08	1.11232e+09	1.95586	4.16722	3.80045	56.3308	50.74	11	16	68.9727	56.99	13	20	46.2509	44.12	8	13	71.2598	56.99	13	21	66.1698	49.26	10	19	61.6808	52.57	12	18	272	30.0052	5.30029
Q8Y6Y9	50S ribosomal protein L21 OS=Listeria monocytogenes GN=rplU - [RL21_LISMO]	0	9.31296e+08	0	4.76946e+08	0	3.21409e+08	>	>	>					11.0366	47.06	4	4					13.5129	46.08	4	5					15.5739	37.25	3	5	102	11.2071	9.56885
Q8YA96	DNA-directed RNA polymerase subunit beta' OS=Listeria monocytogenes GN=rpoC - [RPOC_LISMO]	5.08433e+09	3.15246e+09	1.77643e+09	3011012987	8.19911e+08	9.55753e+08	0.620034	1.69498	1.16568	161.365	41.88	36	53	95.2339	26.98	23	30	190.032	32.31	26	60	189.672	40.97	32	58	104.839	31.06	23	34	96.7619	27.06	22	31	1201	134.713	8.32373
Q8Y571	2,3-bisphosphoglycerate-dependent phosphoglycerate mutase OS=Listeria monocytogenes GN=gpmA - [GPMA_LISMO]	0	2.17908e+08	0	0	0	0	>							6.38266	18.78	2	2																	229	26.4007	5.87158
Q927X8	DegU OS=Listeria monocytogenes GN=degU - [Q927X8_LISMO]	7.58793e+08	1.16923e+09	2.5859e+08	5.22596e+08	1.6115e+08	3.17848e+08	1.54091	2.02094	1.97237	20.7724	28.51	5	7	20.963	31.58	5	7	26.1582	35.09	6	8	24.2898	53.07	8	8	24.7639	28.51	5	8	21.1434	28.51	5	7	228	25.7996	6.80029
Q8Y722	Alanyl-tRNA synthetase OS=Listeria monocytogenes GN=alaS - [SYA_LISMO]	1.94005e+09	4.42621e+09	6.84171e+08	3.05441e+09	4.6262e+08	1.23819e+09	2.28149	4.46439	2.67648	69.7212	30.49	18	21	96.2977	34.36	22	28	82.0221	24.57	16	25	112.701	40.73	26	33	81.4353	26.17	16	24	116.396	42.78	26	34	879	97.9161	5.22412
Q927L2	50S ribosomal protein L22 OS=Listeria monocytogenes GN=rplV - [RL22_LISMO]	1.2541e+08	2.3924e+08	0	1.17481e+08	0	1.03742e+08	1.90766	>	>	5.20799	21.19	2	2	11.5766	29.66	3	4					5.45023	21.19	2	2					9.54172	21.19	2	3	118	12.8661	9.99365
Q8Y458	50S ribosomal protein L13 OS=Listeria monocytogenes GN=rplM - [RL13_LISMO]	0	3.92171e+08	0	4.2811e+08	0	1.59778e+08	>	>	>					11.0282	44.83	4	4					9.06321	31.72	2	3					16.8833	40.69	4	6	145	16.1895	9.78857
Q8YAC3	Cysteine synthase OS=Listeria monocytogenes GN=cysK - [Q8YAC3_LISMO]	2.29146e+08	1.34749e+09	6.49161e+07	840969257	0	4.20859e+08	5.88048	12.9547	>	11.4053	21.43	3	3	24.8423	42.21	7	8	10.3465	21.43	3	3	26.1128	38.64	6	8					28.3794	47.08	8	9	308	32.1978	5.42725
P64074	Enolase OS=Listeria monocytogenes GN=eno - [ENO_LISMO]	3.11018e+08	1.3821e+09	1.68181e+08	1.3279e+09	6.96079e+07	4.66288e+08	4.44378	7.89564	6.69878	17.4689	24.19	5	5	31.6235	38.37	8	9	21.0441	21.86	5	6	52.5211	48.84	10	15	10.753	10.23	3	3	40.8003	36.74	9	12	430	46.4436	4.79248
Q9AGE6	60 kDa chaperonin OS=Listeria monocytogenes GN=groL - [CH60_LISMO]	3.44763e+08	3.86986e+09	7.94171e+07	2.65597e+09	1.60173e+07	9.75998e+08	11.2247	33.4433	60.9338	38.6257	18.63	4	10	113.272	48.52	16	30	26.7626	18.08	4	8	136.492	41.51	16	37	16.6084	18.63	4	5	118.337	50.74	16	32	542	57.3319	4.79248
Q8Y6Y3	MreB protein OS=Listeria monocytogenes GN=mreB - [Q8Y6Y3_LISMO]	729722893	3.32933e+09	2.73595e+08	1.39935e+09	1.78399e+08	6.6616e+08	4.56245	5.11467	3.73411	23.6453	28.19	6	7	58.0965	51.93	16	19	22.9775	23.15	5	7	41.9647	38.87	10	12	22.3639	24.63	5	6	41.2337	35.31	11	12	337	35.4806	5.2876
Q9LAT4	ATPase OppD OS=Listeria monocytogenes GN=oppD - [Q9LAT4_LISMO]	7.40432e+08	1.27851e+09	2.9217e+08	1.49152e+09	9.3571e+07	2.31224e+08	1.7267	5.10497	2.4711	51.7493	42.18	10	15	59.214	42.18	10	17	34.8467	38.83	9	11	43.2515	38.27	9	12	29.3105	28.49	7	9	59.4877	47.21	11	17	358	39.6876	5.99854
Q8YAB6	Endopeptidase Clp ATP-binding chain C OS=Listeria monocytogenes GN=clpC - [Q8YAB6_LISMO]	1.99363e+09	2.86171e+09	5.38734e+08	2.77504e+09	2.03784e+08	1.10114e+09	1.43542	5.15104	5.40347	55.1575	24.15	13	17	76.7766	35.98	22	26	97.4238	28.9	17	33	78.9952	31.71	17	24	63.5073	30.12	16	21	82.1951	36.34	21	26	820	91.1094	7.48877
Q8Y774	Lmo1423 protein OS=Listeria monocytogenes GN=lmo1423 - [Q8Y774_LISMO]	1620535533	8721024557	4.88422e+08	4.53909e+09	3.17256e+08	2.9321e+09	5.38157	9.2934	9.24206	23.688	25	5	6	65.6296	41.3	9	16	27.1752	30.07	6	8	104.831	41.3	9	27	23.1081	30.07	6	6	64.6589	41.3	9	18	276	32.2089	7.59131
P60426	50S ribosomal protein L2 OS=Listeria monocytogenes GN=rplB - [RL2_LISMO]	1.76014e+09	2.02039e+09	4.0519e+08	7.46637e+08	1.41663e+08	5.05856e+08	1.14786	1.84268	3.57085	29.4449	30.32	5	10	20.5582	22.02	3	7	23.8262	30.32	4	8	33.4078	31.05	4	10	26.7511	30.32	5	9	34.4667	30.32	6	11	277	30.4864	10.5356
Q8Y7J2	Lmo1285 protein OS=Listeria monocytogenes GN=lmo1285 - [Q8Y7J2_LISMO]	0	0	0	3.69228e+08	0	2.14802e+08		>	>													8.85064	31.11	3	3					8.38205	31.11	2	3	135	15.4358	4.85596
Q8Y444	50S ribosomal protein L6 OS=Listeria monocytogenes GN=rplF - [RL6_LISMO]	6.70719e+08	8.11595e+08	5.14155e+07	4.97214e+08	0	2.87947e+08	1.21004	9.67051	>	13.9811	39.89	5	5	9.00201	24.16	3	3	7.1473	24.16	3	3	19.5274	48.88	6	7					13.2376	25.28	3	4	178	19.3885	9.74463
Q8Y8E8	Lmo0956 protein OS=Listeria monocytogenes GN=lmo0956 - [Q8Y8E8_LISMO]	2218512800	1.86335e+09	7.4365e+08	1.47983e+09	2.92408e+08	6.21896e+08	0.839908	1.98995	2.12681	49.4739	41.38	11	14	44.8103	41.38	10	13	45.6409	42.71	10	13	38.676	37.93	9	11	29.9119	30.24	8	9	44.0722	44.03	10	13	377	41.3877	5.71924
Q8YAF2	Methionyl-tRNA synthetase OS=Listeria monocytogenes GN=metG - [SYM_LISMO]	8.66492e+08	3.00649e+09	1.84922e+08	1.89372e+09	1.06412e+08	1.04316e+09	3.46973	10.2407	9.80299	26.6936	12.2	6	8	55.1455	31.33	13	16	11.905	7.68	3	4	76.3897	24.85	13	21	15.7843	9.94	4	5	73.8758	31.93	14	23	664	75.6036	5.07178
Q8Y6X2	Threonyl-tRNA synthetase OS=Listeria monocytogenes GN=thrS - [SYT_LISMO]	2.53011e+09	2.90892e+09	1.26491e+09	2.91835e+09	6.18987e+08	1.01123e+09	1.14972	2.30715	1.63368	57.9724	39.38	15	17	40.8138	24.53	9	12	58.3219	27.03	11	18	86.9313	39.22	16	27	53.513	26.72	10	16	57.352	27.03	10	16	640	73.1942	5.35107
Q8Y495	CTP synthase OS=Listeria monocytogenes GN=pyrG - [PYRG_LISMO]	2.2191e+09	2.72138e+09	6.07188e+08	1.99998e+09	4.83425e+08	1.01241e+09	1.22634	3.29383	2.09425	60.5861	37.59	14	18	58.1066	42.67	11	17	46.4527	33.83	8	14	73.4882	41.92	12	19	45.5884	34.4	10	13	59.8458	40.6	10	17	532	59.5298	5.8335
Q8Y674	Lmo1825 protein OS=Listeria monocytogenes GN=lmo1825 - [Q8Y674_LISMO]	246982821	6.86173e+08	5.69691e+07	3.60746e+08	3.5869e+07	2.05293e+08	2.77822	6.33231	5.7234	4.57498	6.27	2	2	26.4519	34.34	8	9	7.6024	6.27	2	3	21.3953	16.04	6	8	5.53609	6.27	2	2	5.69845	6.27	2	2	399	43.3385	6.55127
Q8Y574	3-oxoacyl-[acyl-carrier-protein] synthase 2 OS=Listeria monocytogenes GN=lmo2201 - [Q8Y574_LISMO]	5.77823e+09	5388884810	8.41205e+08	2.11536e+09	1.01515e+09	1.40719e+09	0.932618	2.51468	1.38619	60.69	43.58	8	17	49.0479	35.84	7	12	54.2115	38.5	7	15	58.9164	44.07	8	17	56.1984	43.58	8	16	59.9917	51.82	9	16	413	44.2521	5.43994
O85046	D-alanine aminotransferase OS=Listeria monocytogenes GN=dat - [DAAA_LISMO]	3.68959e+08	6.60316e+08	3.00834e+08	8.08216e+08	1.90554e+08	2.15211e+08	1.78968	2.68659	1.12939	18.3835	26.99	4	5	23.9324	19.72	5	7	5.05955	6.92	2	2	6.55867	13.15	2	2	5.57424	10.03	2	2	9.90065	19.38	3	3	289	32.3828	5.24951
Q8Y767	Lmo1434 protein OS=Listeria monocytogenes GN=lmo1434 - [Q8Y767_LISMO]	1.03191e+09	7.6291e+08	5.40927e+08	1.22197e+09	1.9401e+08	4.71364e+08	0.73932	2.25904	2.42958	30.1683	24.32	9	9	33.058	18.38	7	9	47.9478	20.54	7	13	37.0122	33.51	10	12	28.4973	16.58	5	8	41.6055	27.03	9	13	555	61.8707	6.15088
P58695	Asparaginyl-tRNA synthetase OS=Listeria monocytogenes GN=asnS - [SYN_LISMO]	2.18013e+09	2116756572	5.64959e+08	1.14103e+09	4.05434e+08	5.65539e+08	0.970931	2.01967	1.3949	42.0094	41.4	10	13	42.4963	40	9	12	29.9469	26.98	8	10	55.4901	37.91	9	17	46.7056	44.88	11	14	33.8439	29.53	8	10	430	48.9675	5.12256
Q8Y853	UPF0637 protein lmo1065 OS=Listeria monocytogenes GN=lmo1065 - [Y1065_LISMO]	569802656	6.85522e+08	2.26466e+08	7.90958e+08	9.04739e+07	3.37128e+08	1.20309	3.49261	3.72625	19.1626	26.96	4	5	13.9124	23.04	4	4	17.6053	26.96	4	5	6.76937	9.8	2	2	16.4369	26.96	4	5	23.4968	38.73	6	7	204	23.7033	7.25439
Q8Y583	Lmo2188 protein OS=Listeria monocytogenes GN=lmo2188 - [Q8Y583_LISMO]	3.68918e+09	5.00053e+09	1.22169e+09	6.69774e+09	664396210	1.39313e+09	1.35546	5.48236	2.09684	110.334	46.59	21	33	87.1133	44.26	18	25	87.9825	34.78	15	26	92.0637	41.76	19	28	64.7597	35.77	15	20	75.5952	39.43	15	22	601	68.5311	4.95752
Q92AU6	Lmo1711 protein OS=Listeria monocytogenes GN=lmo1711 - [Q92AU6_LISMO]	1.364e+09	2.07359e+09	3.00634e+08	1316096266	1.37722e+08	5.08713e+08	1.52023	4.37773	3.69377	32.9106	28.54	8	10	39.4878	39.27	9	12	30.5988	28.54	8	10	38.2815	38.29	10	13	16.8029	17.32	5	6	28.5852	25.61	7	9	410	44.9314	4.76709
Q8Y7C5	Bifunctional protein FolD OS=Listeria monocytogenes GN=folD - [FOLD_LISMO]	1.74326e+09	2.50743e+09	7.44335e+08	2.0053e+09	2.06307e+08	8.516e+08	1.43836	2.69408	4.12783	28.7054	42.61	8	9	22.893	28.52	6	8	21.8626	28.52	6	8	21.6514	28.52	6	7	23.9153	28.52	6	9	16.7224	21.83	5	6	284	30.8875	5.60498
Q8Y3K6	Lmo2829 protein OS=Listeria monocytogenes GN=lmo2829 - [Q8Y3K6_LISMO]	0	2.96838e+09	0	2.76921e+09	0	8.35437e+08	>	>	>					26.2532	46.23	6	7					38.2262	46.23	6	12					32.8413	51.26	8	10	199	22.1962	4.81787
Q8Y836	Lmo1082 protein OS=Listeria monocytogenes GN=lmo1082 - [Q8Y836_LISMO]	3.06759e+08	4.79343e+08	8.73887e+07	3.60898e+08	6.77268e+07	8.89471e+07	1.56261	4.1298	1.31332	15.5601	34.41	5	5	15.2648	43.01	5	5	8.64218	23.66	3	3	6.18936	23.12	2	2	15.5884	29.57	4	5	9.4815	28.49	3	3	186	21.0916	5.99854
Q8Y866	Peptide deformylase OS=Listeria monocytogenes GN=def - [DEF_LISMO]	1.44073e+08	6.2755e+08	7551300	6.66919e+08	4.11918e+07	2.29782e+08	4.35579	88.3184	5.57835	8.72574	29.51	3	3	14.8301	40.98	4	5	6.12723	22.95	2	2	21.0618	39.34	4	7	5.93433	22.95	2	2	12.9061	29.51	3	4	183	20.6305	5.30029
Q8Y782	Lmo1414 protein OS=Listeria monocytogenes GN=lmo1414 - [Q8Y782_LISMO]	6.44692e+08	1193884912	2.13505e+08	7.78711e+08	6.99614e+07	2.77494e+08	1.85187	3.64727	3.96639	27.3368	34.96	7	7	30.8832	35.22	7	8	15.6555	17.74	4	4	46.1718	41.39	9	13	17.1088	21.85	5	5	37.6743	35.22	8	10	389	41.0505	5.16064
Q8Y7K9	ATP-dependent Clp protease ATP-binding subunit ClpX OS=Listeria monocytogenes GN=clpX - [CLPX_LISMO]	2.63333e+09	4.00733e+09	6.70789e+08	3.2099e+09	2.39622e+08	1.30961e+09	1.52177	4.78525	5.46532	56.5592	43.44	15	17	74.174	47.49	14	21	61.0116	36.52	12	20	68.0012	45.35	14	20	42.9812	30.07	8	13	60.4681	44.15	13	18	419	46.3693	4.81787
Q8Y6K8	MenF protein OS=Listeria monocytogenes GN=menF - [Q8Y6K8_LISMO]	1.58335e+09	1.50989e+09	3.29653e+08	9.2081e+08	1.7144e+08	5.01889e+08	0.953602	2.79327	2.92749	51.3454	29	12	16	52.7148	34.85	13	16	44.6666	30.74	12	14	42.9056	38.96	12	14	39.4996	28.79	10	12	36.4943	26.19	9	11	462	51.6345	5.8335
Q8Y3P9	Catalase OS=Listeria monocytogenes GN=kat - [CATA_LISMO]	2184850524	1.3833e+09	8.04503e+08	1.75883e+09	3.76964e+08	4.55983e+08	0.633133	2.18623	1.20962	84.1846	46.93	20	27	51.7462	41.8	14	17	47.62	32.17	11	15	54.784	41.6	13	18	50.0074	34.02	13	16	35.8258	31.97	10	11	488	55.8538	5.59229
Q8Y970	Lmo0663 protein OS=Listeria monocytogenes GN=lmo0663 - [Q8Y970_LISMO]	1.92396e+08	3.86074e+08	6.26169e+07	0	2.06424e+07	8.85164e+07	2.00667		4.28808	4.98184	10.76	2	2	16.4959	21.53	4	5	8.43257	14.24	3	3					4.7196	8.68	2	2	12.0753	21.53	4	4	288	32.2921	4.95752
Q8Y6T6	30S ribosomal protein S4 OS=Listeria monocytogenes GN=rpsD - [RS4_LISMO]	2.34523e+09	1.32451e+09	2.43299e+08	7.67591e+08	2.07015e+08	6.34894e+08	0.564768	3.15493	3.06689	40.8963	41.5	8	13	31.1094	34.5	5	9	24.2969	31.5	5	8	21.944	39	5	7	12.4097	12.5	3	4	25.6634	41.5	6	8	200	22.721	10.0669
Q8Y3P3	Lmo2792 protein OS=Listeria monocytogenes GN=lmo2792 - [Q8Y3P3_LISMO]	2.23446e+09	4.03922e+09	9.36561e+08	2.79312e+09	5.7622e+08	1.1268e+09	1.8077	2.98231	1.95549	38.5248	45.24	7	10	32.1431	46.03	7	8	32.8513	37.7	6	9	39.1363	50	8	11	37.3762	50	8	11	34.1002	45.24	7	9	252	28.9039	7.38623
Q8Y4K5	Lmo2433 protein OS=Listeria monocytogenes GN=lmo2433 - [Q8Y4K5_LISMO]	8.28205e+08	4.46823e+08	0	3.63567e+08	8.60975e+07	1.82081e+08	0.539508	>	2.11482	11.6911	22.22	3	4	12.297	29.37	4	4					13.2415	28.57	4	5	10.2878	28.17	4	4	7.37404	25	3	3	252	28.7721	5.13525
O32823	Thioredoxin reductase OS=Listeria monocytogenes GN=trxB - [TRXB_LISMO]	6.3789e+08	2.55243e+09	1.73134e+08	1.31549e+09	1.18352e+08	7.88609e+08	4.00136	7.59812	6.66322	17.7858	14.11	3	5	26.5515	34.17	5	7	11.1062	13.48	3	4	40.0434	22.88	5	11	14.2756	17.87	4	5	30.8101	28.53	5	8	319	34.1524	4.90674
Q8Y6E3	Lmo1744 protein OS=Listeria monocytogenes GN=lmo1744 - [Q8Y6E3_LISMO]	2.74264e+08	5.20809e+08	7.18313e+07	3.18256e+08	4.25568e+07	1.06172e+08	1.89893	4.43061	2.49482	29.2686	30.93	6	8	28.3559	35.74	8	9	16.6327	27.49	5	5	19.4455	30.93	6	6	20.1766	26.12	5	7	28.1353	26.12	5	8	291	32.7197	5.08447
Q8Y5X5	Chorismate synthase OS=Listeria monocytogenes GN=aroC - [AROC_LISMO]	1.64543e+09	3.46193e+09	4.53213e+08	3.22527e+09	1.76194e+08	9.42028e+08	2.10397	7.11645	5.34655	41.8228	36.34	9	13	72.7176	39.69	11	23	44.5666	36.6	10	14	68.5276	45.36	11	20	31.6163	28.09	7	9	50.7823	39.69	10	17	388	42.1457	7.07861
Q92A74	Hup protein OS=Listeria monocytogenes GN=hup - [Q92A74_LISMO]	0	295344515	0	0	0	9.1502e+07	>		>					10.2191	34.07	3	3													9.80367	36.26	2	3	91	9.87638	9.64209
Q8Y864	PdhB protein OS=Listeria monocytogenes GN=PdhB - [Q8Y864_LISMO]	1.02478e+08	3.2817e+08	0	3.50498e+08	2.559e+07	4.25784e+07	3.20234	>	1.66387	20.2149	19.38	4	6	33.6895	23.38	4	8					10.4037	20	3	3	8.74858	14.46	2	2	12.4427	19.38	3	3	325	35.2882	4.86865
Q8Y5V7	ResD protein OS=Listeria monocytogenes GN=resD - [Q8Y5V7_LISMO]	5.33654e+08	7.92671e+08	1.60704e+08	4.53615e+08	0	9.99434e+07	1.48537	2.82267	>	5.87089	13.03	2	2	11.1215	28.15	4	4	6.54891	13.03	2	2	13.569	39.08	4	4					5.53437	13.03	2	2	238	27.4362	5.21143
Q8Y6D2	Glutamyl-tRNA(Gln) amidotransferase subunit A OS=Listeria monocytogenes GN=gatA - [GATA_LISMO]	1.38656e+10	7.17292e+09	4.46466e+09	5.78738e+09	2.62985e+09	1.9984e+09	0.517317	1.29626	0.759892	96.309	45.34	17	30	41.2711	36.02	10	12	79.2908	40.99	14	24	86.2773	42.44	15	24	59.1228	40.17	12	17	59.8719	38.1	11	18	483	52.3195	5.04639
Q8Y5M1	UDP-N-acetylmuramoylalanine--D-glutamate ligase OS=Listeria monocytogenes GN=murD - [MURD_LISMO]	8.52752e+08	2.11992e+09	4.9588e+08	1.41968e+09	2.12142e+08	4.77087e+08	2.48597	2.86295	2.24891	58.7391	38.46	10	16	54.0725	42.42	11	15	40.4676	35.16	9	12	53.7302	29.45	9	13	33.8904	17.8	4	8	54.0077	27.91	7	12	455	50.399	5.75732
P66484	30S ribosomal protein S19 OS=Listeria monocytogenes GN=rpsS - [RS19_LISMO]	612406222	4.75611e+08	6.56154e+07	203030538	5.8158e+07	1.26378e+08	0.776627	3.09425	2.17302	6.03505	27.17	2	2	10.6024	48.91	3	3	5.59918	27.17	2	2	5.84552	27.17	2	2	6.18359	27.17	2	2	11.5829	48.91	3	3	92	10.4685	9.93506
Q8Y6V3	Lmo1578 protein OS=Listeria monocytogenes GN=lmo1578 - [Q8Y6V3_LISMO]	2.18763e+09	2.837e+09	7.48681e+08	1.91105e+09	4.66825e+08	9.55716e+08	1.29684	2.55256	2.04727	70.5061	40.82	12	23	61.102	36.99	12	18	34.6646	28.22	8	10	70.0141	41.1	14	21	34.181	32.33	9	10	33.1297	36.16	10	10	365	40.2817	4.99561
Q8Y5H3	Lmo2089 protein OS=Listeria monocytogenes GN=lmo2089 - [Q8Y5H3_LISMO]	0	7.42011e+08	0	3.09396e+08	0	1.72719e+08	>	>	>					13.2153	24.21	4	4					15.5853	28.24	4	4					20.2566	24.21	4	5	347	38.4322	6.59521
Q8Y822	GMP synthase [glutamine-hydrolyzing] OS=Listeria monocytogenes GN=guaA - [GUAA_LISMO]	6.11313e+08	1168554434	7.31401e+07	5.35969e+08	8.27358e+07	2.7791e+08	1.91155	7.32798	3.35901	43.0563	34.17	11	13	36.1975	26.64	8	12	21.4886	12.74	4	7	48.9739	41.51	11	16	18.3284	18.53	6	6	12.8108	15.44	5	5	518	58.0776	5.07178
Q8Y6B1	Peptidase T OS=Listeria monocytogenes GN=pepT - [PEPT_LISMO]	9.74214e+08	1.22109e+09	2.71336e+08	7.17007e+08	1.63395e+08	3.48186e+08	1.25341	2.64251	2.13094	43.143	38.78	12	14	50.4459	35.37	11	15	32.0425	36.83	9	10	25.9607	23.9	6	8	36.8488	31.46	8	12	31.1464	31.46	8	10	410	45.7051	5.08447
Q8Y7I9	S-ribosylhomocysteine lyase OS=Listeria monocytogenes GN=luxS - [LUXS_LISMO]	1.96002e+09	1.96342e+09	4.28416e+08	1031569219	3.17858e+08	5.76988e+08	1.00173	2.40787	1.81524	29.2509	43.23	6	10	31.5731	44.52	7	10	20.0034	30.32	5	7	22.5358	35.48	4	8	18.8833	25.81	4	7	14.15	30.32	4	5	155	17.3565	5.50342
Q8Y653	Manganese-binding lipoprotein mntA OS=Listeria monocytogenes GN=mntA - [MNTA_LISMO]	3.50652e+08	5.96494e+08	0	3.85884e+08	0	1.63516e+08	1.7011	>	>	7.04925	8.71	2	2	13.2852	14.84	3	4					7.0802	16.13	3	3					16.2753	26.77	5	5	310	34.3957	5.63037
Q8Y570	Chaperone protein ClpB OS=Listeria monocytogenes GN=clpB - [CLPB_LISMO]	1.55384e+09	2.20878e+09	3.11348e+08	1.54031e+09	2.16167e+08	6.70397e+08	1.4215	4.94723	3.1013	93.4324	34.76	16	27	109.971	35.57	18	32	80.6865	31.76	14	23	113.127	33.14	15	31	81.1957	32.91	15	23	75.0788	33.26	14	21	866	97.503	5.05908
Q92CE7	Lmo1257 protein OS=Listeria monocytogenes GN=lmo1257 - [Q92CE7_LISMO]	4.51854e+08	2.0602e+09	1.14413e+08	2.97667e+08	8.37485e+07	4.62233e+08	4.55943	2.6017	5.5193	5.68928	15.58	2	2	12.5275	31.82	4	5	6.99433	22.08	3	3	9.74369	25.97	3	3	6.89551	22.08	3	3	11.1998	31.82	4	4	154	18.0822	5.021
Q8Y848	UPF0358 protein lmo1070 OS=Listeria monocytogenes GN=lmo1070 - [Y1070_LISMO]	1.84667e+09	3.5701e+09	2.28968e+08	1.48062e+09	1.56503e+08	9.40759e+08	1.93327	6.46651	6.01114	16.589	35.48	5	6	14.8819	39.78	4	5	9.69796	33.33	3	4	23.7936	47.31	6	9	15.9225	39.78	4	6	19.1374	47.31	7	7	93	10.7366	5.94775
Q8Y7A7	Acylphosphatase OS=Listeria monocytogenes GN=acyP - [ACYP_LISMO]	0	0	0	272401452	0	0		>														7.17745	35.48	2	2									93	10.4594	7.43018
Q8Y6J6	Lmo1688 protein OS=Listeria monocytogenes GN=lmo1688 - [Q8Y6J6_LISMO]	2.7041e+08	5.77181e+09	8.21654e+07	3.11268e+09	4.14224e+07	6.42429e+08	21.3447	37.883	15.5092	10.4453	13.71	3	3	38.777	25	8	14	13.2221	17.74	3	4	73.3015	43.55	9	26	18.5635	13.71	3	5	37.402	34.68	7	11	248	27.1693	6.37939
P28764	Superoxide dismutase [Mn] OS=Listeria monocytogenes GN=sodA - [SODM_LISMO]	1.09697e+09	1115446058	0	4.42265e+08	0	4.2408e+08	1.01684	>	>	8.76521	13.86	2	3	12.83	24.26	3	4					13.1913	39.11	4	4					20.683	34.65	4	7	202	22.6172	5.41455
Q8Y8D1	Lmo0977 protein OS=Listeria monocytogenes GN=lmo0977 - [Q8Y8D1_LISMO]	9.27714e+08	1.96629e+09	2.64913e+08	1.59414e+09	1.28072e+08	4.22796e+08	2.1195	6.0176	3.30124	20.5547	35.34	6	6	35.5943	46.99	7	10	22.6652	24.9	4	6	49.4852	44.18	7	14	21.664	24.9	4	6	43.6179	40.56	6	11	249	28.8857	5.49072
Q8Y764	Aspartate-semialdehyde dehydrogenase OS=Listeria monocytogenes GN=lmo1437 - [Q8Y764_LISMO]	967486861	1.30878e+09	4.4407e+08	1.36027e+09	2.59354e+08	3.69267e+08	1.35276	3.06319	1.4238	22.1169	23.63	4	6	30.2848	38.9	7	8	24.3629	31.41	6	8	50.0714	46.97	8	13	30.3482	27.38	6	9	33.7868	35.45	6	9	347	37.5755	5.60498
Q8Y8A1	2,3,4,5-tetrahydropyridine-2,6-dicarboxylate N-acetyltransferase OS=Listeria monocytogenes GN=dapH - [DAPH_LISMO]	1.55515e+09	2.41705e+09	6.7953e+08	2.22383e+09	2.99569e+08	1.02394e+09	1.55423	3.2726	3.41806	39.8449	46.61	8	11	38.7374	46.61	9	11	53.0308	46.61	8	15	63.5336	46.61	8	17	39.7325	46.61	8	11	36.5402	41.1	7	10	236	24.8191	5.07178
Q8Y5B2	Ribonucleoside-diphosphate reductase OS=Listeria monocytogenes GN=lmo2155 - [Q8Y5B2_LISMO]	2.91639e+09	2.47164e+09	4.47784e+08	1.32984e+09	2.63846e+08	6.27981e+08	0.8475	2.96982	2.3801	76.4244	36.57	19	24	67.2633	30.14	15	21	60.06	28.7	15	19	66.4289	28.05	14	20	59.6407	30.14	15	19	56.8639	30.01	15	17	763	87.34	5.8208
Q8Y6X8	Glutamate-1-semialdehyde 2,1-aminomutase 1 OS=Listeria monocytogenes GN=hemL1 - [GSA1_LISMO]	7.05101e+08	7.05619e+08	86795604	752133001	6.93048e+07	2.28688e+08	1.00073	8.66557	3.29974	19.719	19.11	5	7	29.344	25.17	6	9	6.54748	7.69	2	2	20.7672	24.94	6	8	6.95299	7.69	2	2	17.3513	17.95	5	6	429	46.5739	5.64307
Q8Y8D0	Branched-chain-amino-acid aminotransferase OS=Listeria monocytogenes GN=lmo0978 - [Q8Y8D0_LISMO]	2214316529	3235747001	5.73918e+08	2810295844	3.73408e+08	9.78796e+08	1.46128	4.89668	2.62125	17.2578	20.94	5	5	25.6116	32.74	7	8	23.873	28.32	6	7	19.7646	24.48	6	6	24.5717	25.37	6	8	19.389	28.32	6	6	339	37.3525	5.2749
Q8Y5G1	Glutamine amidotransferase subunit pdxT OS=Listeria monocytogenes GN=pdxT - [PDXT_LISMO]	7.12566e+08	5.52953e+08	7.80765e+07	8.7067e+08	6.48915e+07	5.4272e+08	0.776003	11.1515	8.3635	5.36439	18.62	2	2	15.3513	32.45	3	4	7.79782	18.62	2	2	32.2694	44.68	4	8	7.76988	18.62	2	2	12.7248	18.62	3	4	188	20.4867	5.41455
Q8YAB9	tRNA-dihydrouridine synthase OS=Listeria monocytogenes GN=lmo0227 - [Q8YAB9_LISMO]	0	9.10117e+08	0	5.69019e+08	0	3.56551e+08	>	>	>					34.3834	35.95	8	10					39.5638	35.95	8	11					39.8354	38.67	8	11	331	36.7669	6.44287
P0A3L1	Translation initiation factor IF-3 OS=Listeria monocytogenes GN=infC - [IF3_LISMO]	2.94592e+09	3379602940	5.25972e+08	1.11795e+09	4.28469e+08	1.015e+09	1.14721	2.12549	2.3689	30.7611	46.2	7	10	26.3999	39.18	5	8	18.3475	46.2	5	6	18.0937	33.33	5	6	12.5947	32.16	4	4	23.0922	46.2	7	8	171	19.6345	9.53955
Q8Y4P5	Ferredoxin--NADP reductase 2 OS=Listeria monocytogenes GN=lmo2390 - [FENR2_LISMO]	4.6741e+08	9.34149e+08	3.35382e+08	1.39767e+09	1.56431e+08	2.8064e+08	1.99856	4.16741	1.79402	22.2558	21.75	3	5	20.5057	25.68	4	5	16.1362	21.75	3	4	17.4703	30.21	5	5	13.5982	25.68	4	4	22.2994	29.31	5	6	331	36.4036	5.42725
Q8Y915	Glucosamine--fructose-6-phosphate aminotransferase [isomerizing] OS=Listeria monocytogenes GN=glmS - [GLMS_LISMO]	2905137538	996565565	8.15769e+08	1.55997e+09	3.8069e+08	2.57597e+08	0.343036	1.91227	0.676659	89.7414	34.44	14	23	89.5221	28.95	10	20	79.5544	39.27	13	21	64.3013	26.96	9	17	69.6364	32.78	15	19	39.7183	27.79	9	11	601	65.726	5.30029
Q8Y577	Tryptophanyl-tRNA synthetase OS=Listeria monocytogenes GN=trpS - [SYW_LISMO]	1.83807e+08	5.33454e+08	1.77308e+08	737416825	5.73657e+07	1.81371e+08	2.90225	4.15895	3.16166	20.7729	27.19	5	6	32.3533	32.02	8	9	20.0471	27.49	6	6	30.3212	34.44	9	10	18.9321	15.11	3	5	29.6976	27.79	6	8	331	36.8693	7.38623
Q8Y8E7	Glucosamine-6-phosphate deaminase OS=Listeria monocytogenes GN=nagB - [NAGB_LISMO]	3.14465e+09	2.81052e+09	6.99854e+08	1.74846e+09	5.3434e+08	2.09183e+08	0.893747	2.49832	0.39148	24.8549	42.31	6	8	29.6194	41.88	5	10	28.2425	41.88	6	9	26.3943	38.03	4	8	24.6997	31.2	6	8	12.1129	24.36	3	4	234	25.4949	4.91943
Q8Y825	NH(3)-dependent NAD(+) synthetase OS=Listeria monocytogenes GN=nadE - [NADE_LISMO]	8.13597e+08	7.8805e+08	1.2001e+08	8.5438e+08	1.77395e+08	2.31024e+08	0.968601	7.11926	1.30231	98.8646	33.21	5	29	138.894	33.21	6	39	59.2782	30.66	4	18	164.052	28.47	4	47	25.6971	30.66	4	8	32.4788	42.7	6	10	274	30.5695	5.21143
Q8Y9G8	Lmo0560 protein OS=Listeria monocytogenes GN=lmo0560 - [Q8Y9G8_LISMO]	1.21436e+09	8.00525e+08	2.46155e+08	5.74105e+08	1.19863e+08	1.38629e+08	0.659217	2.33229	1.15656	36.8261	36.46	9	10	27.1092	30.79	7	8	26.363	27.29	8	8	33.1778	36.46	9	9	23.6628	23.36	6	7	18.553	28.82	6	6	458	49.2359	5.75732
Q8Y5N8	Isoleucyl-tRNA synthetase OS=Listeria monocytogenes GN=ileS - [SYI_LISMO]	3.63738e+09	2.02971e+09	1.68213e+09	2.08372e+09	7.30757e+08	8.43246e+08	0.558013	1.23873	1.15394	102.591	33.88	17	29	87.1631	30.73	14	24	116.932	31.05	17	34	54.8403	24.32	11	17	63.0432	25.41	14	19	53.9612	23.89	14	19	921	103.785	5.31299
Q8Y6T0	Lmo1603 protein OS=Listeria monocytogenes GN=lmo1603 - [Q8Y6T0_LISMO]	7.1141e+08	9.57314e+08	2.86078e+08	6.41703e+08	1.2221e+08	3.06697e+08	1.34566	2.24311	2.50959	29.6562	29.19	9	10	31.2599	33.51	10	10	26.8733	23.51	8	9	32.8586	30	9	11	25.1675	24.32	8	8	33.095	24.86	8	11	370	41.0393	4.81787
P58724	Blue-light photoreceptor OS=Listeria monocytogenes GN=lmo0799 - [PHOT_LISMO]	3.26459e+08	8.12053e+08	1.29165e+08	4.77476e+08	8.58226e+07	2.63696e+08	2.48745	3.69663	3.07257	17.6206	28.85	4	5	22.2774	33.99	5	6	10.7433	12.25	2	3	19.6662	37.55	5	6	8.08535	12.25	2	2	13.6167	28.85	4	4	253	28.7984	4.83057
Q8Y4U2	Pseudouridine-5'-phosphate glycosidase OS=Listeria monocytogenes GN=psuG - [Q8Y4U2_LISMO]	2.61603e+08	590265089	1.53035e+08	5.99127e+08	7.53736e+07	3.01576e+08	2.25634	3.91496	4.00108	8.27377	11.22	3	3	17.0946	16.17	4	6	9.43177	7.92	2	3	11.0977	17.16	4	4	5.67395	6.6	2	2	12.7821	7.92	2	4	303	32.568	4.84326
Q8Y9I9	Tagatose 1,6-diphosphate aldolase OS=Listeria monocytogenes GN=lacD - [LACD_LISMO]	1.38802e+09	2.70964e+09	5.11642e+08	1.96724e+09	2.3964e+08	6.09624e+08	1.95215	3.84496	2.54391	46.9938	40.53	11	14	51.4274	36.09	12	16	43.9433	28.11	8	13	44.6507	32.25	10	14	36.8857	27.81	7	11	47.1728	31.36	10	14	338	37.6602	5.04639
Q8Y6M0	S-adenosylmethionine synthase OS=Listeria monocytogenes GN=metK - [METK_LISMO]	2.95314e+08	4.75736e+08	1.24441e+08	7.13489e+08	3.11588e+07	6.3139e+07	1.61095	5.73354	2.02636	35.1089	33.08	8	10	28.9321	25.81	6	8	21.8682	13.53	3	5	32.7469	32.58	7	9	21.0111	17.04	4	6	35.8282	19.55	4	8	399	43.5244	5.14795
Q8Y581	Lmo2192 protein OS=Listeria monocytogenes GN=lmo2192 - [Q8Y581_LISMO]	2226107050	1.98166e+09	7.07752e+08	1.16505e+09	3.88635e+08	6.81084e+08	0.890193	1.64612	1.7525	30.65	28.57	8	10	33.2469	32.61	9	11	21.8514	18.32	5	7	26.7237	29.81	6	7	19.0362	18.32	5	6	26.3835	27.02	7	8	322	36.5979	7.35693
Q8Y5M2	UDP-N-acetylglucosamine--N-acetylmuramyl-(pentapeptide) pyrophosphoryl-undecaprenol N-acetylglucosamine transferase OS=Listeria monocytogenes GN=murG - [MURG_LISMO]	6.70208e+08	4.02866e+08	7.58646e+07	2.9832e+08	1.3104e+08	1.15581e+08	0.601106	3.93227	0.882028	21.0291	23.97	6	7	16.1717	18.46	4	5	8.21071	10.47	3	3	8.77009	14.33	3	3	13.1189	17.08	5	5	10.8295	11.57	3	4	363	38.9906	7.12256
Q8Y6W5	Isocitrate dehydrogenase [NADP] OS=Listeria monocytogenes GN=citC - [Q8Y6W5_LISMO]	9.98457e+08	1.45191e+09	5.43673e+08	1.54593e+09	1.40871e+08	4.03475e+08	1.45415	2.84349	2.86415	19.8678	28.1	7	7	28.9586	28.33	8	10	23.3132	25.24	6	8	31.9538	35	8	11	18.0614	20	5	6	33.6186	30.24	8	11	420	46.1189	5.2749
Q8Y5G0	Pta protein OS=Listeria monocytogenes GN=pta - [Q8Y5G0_LISMO]	1.33065e+09	1.73837e+09	2.93456e+08	1.67061e+09	1.56892e+08	3.11185e+08	1.30641	5.69287	1.98343	22.937	26.46	5	6	36.4263	35.38	8	11	26.7843	39.69	7	8	34.0259	40.92	7	10	28.7215	31.08	5	7	20.8313	18.15	3	5	325	34.3921	5.2749
Q8Y6U8	Probable thiol peroxidase OS=Listeria monocytogenes GN=tpx - [TPX_LISMO]	5.02099e+08	3.98595e+08	0	0	5.41024e+07	0	0.793856			8.88151	23.03	2	3	12.2964	23.03	3	4									10.335	23.03	2	3					165	18.1223	5.36377
Q8Y685	Lmo1812 protein OS=Listeria monocytogenes GN=lmo1812 - [Q8Y685_LISMO]	0	2173375132	0	1.34072e+09	0	7.76845e+08	>	>	>					28.1425	16.22	4	7					41.1315	43.58	7	12					22.5789	16.22	4	6	296	30.8375	4.88135
Q8Y742	Elongation factor 4 OS=Listeria monocytogenes GN=lepA - [LEPA_LISMO]	383794132	7.74669e+08	1.96665e+08	9.69831e+08	9.15771e+07	2.89006e+08	2.01845	4.9314	3.15588	57.6523	32.07	11	16	61.6363	32.24	12	17	38.4891	16.45	6	10	73.1913	29.11	10	21	44.1741	24.34	9	12	68.5435	35.69	13	19	608	67.7803	5.16064
P66352	30S ribosomal protein S11 OS=Listeria monocytogenes GN=rpsK - [RS11_LISMO]	3136637051	4.22231e+09	6.24439e+08	2.91328e+09	2.24527e+08	9.10566e+08	1.34613	4.66544	4.05548	9.25233	30.23	2	3	17.8735	37.98	4	6	17.5449	30.23	2	6	8.99554	30.23	2	3	12.1921	30.23	3	4	13.9954	37.98	4	5	129	13.7774	11.3999
Q927Y2	Lmo2511 protein OS=Listeria monocytogenes GN=lmo2511 - [Q927Y2_LISMO]	0	3488316976	0	4377408689	0	1457462756	>	>	>					20.0166	43.32	4	6					21.9463	28.34	2	7					14.6967	33.69	3	5	187	21.62	5.38916
Q8Y8E2	Listeria epitope LemA OS=Listeria monocytogenes GN=lemA - [Q8Y8E2_LISMO]	0	6.23431e+08	0	0	0	1.85064e+08	>		>					12.0973	35.68	4	4													6.0485	20	2	2	185	21.1812	7.48877
Q8Y6S8	UDP-N-acetylmuramate--L-alanine ligase OS=Listeria monocytogenes GN=murC - [MURC_LISMO]	9.8567e+08	1.38303e+09	3.91552e+08	1.32557e+09	1.92619e+08	4.95909e+08	1.40314	3.38542	2.57456	39.1409	38.03	10	12	40.0592	40.94	11	12	34.8495	35.57	9	11	38.5084	40.27	11	13	27.9151	28.64	8	9	32.7456	28.86	8	10	447	50.0424	5.59229
Q8Y436	Lmo2637 protein OS=Listeria monocytogenes GN=lmo2637 - [Q8Y436_LISMO]	1.24119e+08	6.75873e+08	1.78517e+07	4.49428e+08	0	2.20742e+08	5.44534	25.1756	>	7.49736	11.37	2	2	20.9022	30.77	5	6	8.86076	11.37	2	2	36.5956	42.14	8	10					27.1305	37.46	6	7	299	32.7213	6.65381
Q8YAG5	Lmo0161 protein OS=Listeria monocytogenes GN=lmo0161 - [Q8YAG5_LISMO]	0	9.8368e+08	0	6.51108e+08	0	1.84865e+08	>	>	>					24.2627	30.43	5	7					17.7285	30.43	5	6					21.3117	30.43	5	7	276	31.7169	5.08447
Q8Y781	Lmo1415 protein OS=Listeria monocytogenes GN=lmo1415 - [Q8Y781_LISMO]	1.36362e+09	1.79846e+09	3.80409e+08	1.89983e+09	1.47696e+08	4.30638e+08	1.31889	4.99418	2.9157	22.6214	31.44	6	7	17.7255	31.44	6	6	23.8702	31.44	6	7	37.8984	26.29	6	11	11.2491	10.57	2	3	19.4008	23.71	5	6	388	43.217	5.21143
Q8Y4U5	Fructose-1-phosphate kinase OS=Listeria monocytogenes GN=fruB - [Q8Y4U5_LISMO]	5.26342e+08	7.2177e+08	2.89331e+08	7.82933e+08	1.47983e+08	1.78547e+08	1.3713	2.70601	1.20654	41.8623	37.79	8	12	22.2803	31.6	6	7	39.4925	37.79	7	11	27.6293	31.6	7	8	28.3871	37.79	8	8	40.8738	37.13	8	11	307	33.1624	5.56689
Q8Y709	Aspartyl-tRNA synthetase OS=Listeria monocytogenes GN=aspS - [SYD_LISMO]	1.09508e+09	4.32994e+09	2.64836e+08	2.54758e+09	9.70754e+07	5.66023e+08	3.95401	9.61948	5.83076	70.1132	31.64	13	18	97.1235	34.18	15	25	36.0502	23.52	7	10	120.876	30.12	15	34	29.8958	19.97	8	9	111.234	40.27	18	29	591	66.3412	5.07178
Q8Y6B8	Adenylosuccinate lyase OS=Listeria monocytogenes GN=purB - [Q8Y6B8_LISMO]	6.3796e+08	569343884	3.98222e+08	6.20722e+08	1.22886e+08	1.10904e+08	0.892445	1.55873	0.902493	23.6781	20.23	7	8	25.4855	19.07	7	9	19.5559	21.63	7	7	26.6692	20.47	8	10	25.4848	15.58	6	9	15.5023	18.6	6	6	430	49.0542	5.74463
Q8YA86	Lmo0273 protein OS=Listeria monocytogenes GN=lmo0273 - [Q8YA86_LISMO]	0	9.50498e+08	1.05195e+08	4.54709e+08	5.46926e+07	3.12082e+08	>	4.32252	5.7061					24.6463	37.13	4	6	15.4485	37.13	3	4	16.4693	42.51	5	5	8.13667	32.93	3	3	24.5548	42.51	5	7	167	18.6507	5.65576
Q8Y3X2	Lmo2707 protein OS=Listeria monocytogenes GN=lmo2707 - [Q8Y3X2_LISMO]	3.87902e+08	5.89539e+08	1.67955e+08	5.58606e+08	8.87459e+07	9.85298e+07	1.51982	3.32593	1.11025	9.31461	42.47	3	3	15.0114	42.47	3	4	15.1451	42.47	3	4	21.4746	42.47	3	6	12.3702	42.47	3	3	15.3331	42.47	3	4	73	8.3313	4.97021
Q8Y7F9	NusA protein OS=Listeria monocytogenes GN=nusA - [Q8Y7F9_LISMO]	1.05305e+09	9.64143e+08	2.48513e+08	8.05518e+08	1.73644e+08	388257042	0.915574	3.24135	2.23594	26.8493	27.96	7	8	44.3953	27.15	8	11	31.9539	27.96	7	10	30.2981	27.42	7	10	31.9634	26.88	7	10	41.9933	29.03	9	13	372	41.6585	4.86865
Q8Y770	Lmo1431 protein OS=Listeria monocytogenes GN=lmo1431 - [Q8Y770_LISMO]	1.08924e+09	7.6814e+08	2.45514e+08	8.34195e+08	1.01494e+08	1.6265e+08	0.705205	3.39775	1.60255	48.4986	30.58	10	13	33.8971	21.39	7	8	37.5536	13.7	4	8	58.2566	27.77	9	15	18.086	10.13	3	5	16.9953	14.26	5	5	533	60.2606	5.09717
Q8Y5X0	Lmo1935 protein OS=Listeria monocytogenes GN=lmo1935 - [Q8Y5X0_LISMO]	1.08091e+08	2.38696e+08	0	2.56208e+08	0	1.46136e+08	2.20829	>	>	11.0726	15.95	3	4	18.28	23.62	4	5					16.2065	19.63	3	4					13.1489	23.62	4	5	326	36.6116	5.0083
Q8Y6M4	Leucyl-tRNA synthetase OS=Listeria monocytogenes GN=leuS - [SYL_LISMO]	1.4552e+09	9.64896e+08	6.44046e+08	1.27263e+09	2.7493e+08	4.71522e+08	0.663066	1.976	1.71507	50.2589	36.24	13	16	55.8583	27.15	10	15	72.9388	31.01	10	19	46.9814	26.53	10	14	41.2175	24.78	10	12	40.2475	25.9	10	11	803	91.8384	5.10986
Q8YAB8	Lysyl-tRNA synthetase OS=Listeria monocytogenes GN=lysS - [SYK_LISMO]	1.77115e+09	4.25248e+09	719913422	2.8545e+09	3.12773e+08	1.08147e+09	2.40098	3.96506	3.45769	53.0496	27.11	9	17	64.5536	37.55	12	22	27.3477	22.09	7	9	55.4422	38.96	12	19	40.6038	26.71	9	13	43.4795	31.12	10	14	498	57.4021	5.26221
Q8Y6Z6	L-lactate dehydrogenase 2 OS=Listeria monocytogenes GN=ldh2 - [LDH2_LISMO]	1.13761e+09	1.34991e+09	3.58436e+08	8.10671e+08	1.57796e+08	4.32998e+08	1.18662	2.26169	2.74404	20.4624	27.01	6	6	24.7209	38.26	8	8	23.0448	30.23	6	7	30.9895	34.41	7	9	11.3815	15.76	4	4	28.8587	38.26	8	9	311	33.7195	5.56689
Q8Y565	Ferrochelatase OS=Listeria monocytogenes GN=hemH - [HEMH_LISMO]	1.72397e+09	1.6486e+09	3.3944e+08	1.23028e+09	2.19409e+08	4.08329e+08	0.956278	3.62445	1.86104	27.6961	24.27	5	8	26.6786	28.8	6	8	33.2319	24.27	5	10	20.3466	28.8	6	7	25.554	25.24	5	7	23.888	29.77	6	7	309	35.3217	5.23682
Q8Y8J8	Lmo0903 protein OS=Listeria monocytogenes GN=lmo0903 - [Q8Y8J8_LISMO]	5.21849e+08	1547352381	0	686728544	0	1.8269e+08	2.96513	>	>	14.0459	32.54	2	3	15.2795	32.54	2	4					10.2161	32.54	2	3					18.3267	32.54	2	4	126	13.9673	5.49072
Q8YAD4	Bifunctional protein glmU OS=Listeria monocytogenes GN=glmU - [GLMU_LISMO]	7.86506e+08	7.74517e+08	1.88484e+08	5.16894e+08	1.01038e+08	2.10773e+08	0.984758	2.74238	2.08607	51.0144	35.01	12	15	46.7377	36.76	11	13	27.0787	24.95	7	9	55.8611	27.35	12	17	25.7432	19.91	7	8	13.6751	14	4	4	457	49.7797	6.354
Q8Y6X9	Valyl-tRNA synthetase OS=Listeria monocytogenes GN=valS - [SYV_LISMO]	1.9435e+09	2.31018e+09	6.50223e+08	1.44744e+09	2.77568e+08	5.04321e+08	1.18867	2.22607	1.81693	61.4469	27.75	16	20	66.4938	29.11	18	22	66.9431	26.05	15	20	75.3668	23.22	14	22	56.9081	24.58	16	19	57.6569	26.5	15	18	883	102.029	5.08447
Q8Y640	Peptide methionine sulfoxide reductase MsrA OS=Listeria monocytogenes GN=msrA - [MSRA_LISMO]	0	7.7027e+08	0	1.7416e+08	0	1.39048e+08	>	>	>					14.8694	41.81	5	5					6.59582	19.77	2	2					11.0202	32.2	4	4	177	19.9207	5.59229
P66699	DNA-directed RNA polymerase subunit alpha OS=Listeria monocytogenes GN=rpoA - [RPOA_LISMO]	1.80886e+09	3.14023e+09	3.01942e+08	1.84961e+09	1.59971e+08	6.04728e+08	1.73602	6.12572	3.78024	41.9923	29.62	6	15	37.0823	25.8	6	11	29.7118	29.62	6	9	29.8958	35.35	6	8	36.737	31.53	7	13	36.6168	25.8	6	13	314	34.8841	4.89404
Q92CZ5	Lmo1027 protein OS=Listeria monocytogenes GN=lmo1027 - [Q92CZ5_LISMO]	8.04082e+08	1.31438e+09	1.84493e+08	9.27151e+08	6.95801e+07	3.28136e+08	1.63464	5.02541	4.71595	24.6463	16.04	6	8	36.7613	22.88	7	11	23.5338	17.48	5	7	29.012	27.39	8	9	6.15309	3.96	2	2	30.26	23.42	8	10	555	61.5208	6.63916
Q8Y5L9	UDP-N-acetylmuramoyl-L-alanyl-D-glutamate--2,6-diaminopimelate ligase OS=Listeria monocytogenes GN=murE - [MURE_LISMO]	7.74817e+08	8.881e+08	1.93068e+08	7.24464e+08	8.01548e+07	1.7405e+08	1.1462	3.75237	2.17142	34.6452	32.79	7	11	24.76	28.11	7	8	23.3634	22.81	6	7	35.0746	29.33	6	10	27.9683	27.7	7	8	17.6397	13.44	3	5	491	53.7135	5.46533
Q8Y6T2	3-deoxy-D-arabino-heptulosonate 7-phosphate synthase OS=Listeria monocytogenes GN=aroA - [Q8Y6T2_LISMO]	2.20616e+09	1.71593e+09	4.63282e+08	1.74339e+09	3.451e+08	8.34881e+08	0.777789	3.76312	2.41925	39.9337	38.23	9	11	43.2923	29.64	7	11	44.3067	25.76	8	13	50.0044	32.41	9	14	27.9258	31.58	8	8	47.5124	35.73	8	13	361	39.6601	5.5415
Q8Y5U9	Fur protein OS=Listeria monocytogenes GN=fur - [Q8Y5U9_LISMO]	1.16506e+08	5.18021e+08	0	213705503	0	0	4.44629	>		9.36307	26	2	3	11.0966	41.33	4	4					5.49616	26	2	2									150	17.317	6.41748
Q8Y576	Lmo2199 protein OS=Listeria monocytogenes GN=lmo2199 - [Q8Y576_LISMO]	0	1.57258e+08	0	250359289	8.79542e+06	9.00707e+07	>	>	10.2406					5.86225	16.67	2	2					5.74405	16.67	2	2	5.1751	16.67	2	2	8.70268	16.67	2	3	138	14.4943	4.88135
Q8Y788	DNA mismatch repair protein mutL OS=Listeria monocytogenes GN=mutL - [MUTL_LISMO]	2.42512e+08	9.68261e+08	1.48299e+08	5.97518e+08	4.7549e+07	3.62955e+08	3.99264	4.02915	7.63329	18.179	13.81	4	5	33.4801	27.62	8	9	28.3433	17.3	5	7	40.9008	25.29	8	11	30.1869	15.47	5	8	35.3534	31.95	9	10	601	67.7523	5.63037
Q8Y7A2	Lmo1387 protein OS=Listeria monocytogenes GN=lmo1387 - [Q8Y7A2_LISMO]	1.15606e+08	2.60781e+08	0	1.82197e+08	0	8.88302e+07	2.25578	>	>	8.76562	12.9	3	3	11.3949	15.05	3	4					15.6556	16.85	3	4					10.0662	15.05	3	3	279	30.5135	4.83057
Q8Y708	Histidyl-tRNA synthetase OS=Listeria monocytogenes GN=hisS - [SYH_LISMO]	2.34579e+09	1.82855e+09	3.3733e+08	1.03124e+09	1.95812e+08	519377852	0.779501	3.05705	2.65243	45.7274	30.82	8	12	34.2797	30.82	7	9	61.338	35.29	9	16	61.7604	30.35	7	16	58.1759	36.47	9	15	41.6108	33.18	8	11	425	48.4146	5.36377
P60357	UPF0297 protein lmo1503 OS=Listeria monocytogenes GN=lmo1503 - [Y1503_LISMO]	0	1.66573e+08	0	2.01836e+08	0	3.17986e+07	>	>	>					9.48549	41.11	3	3					15.0343	41.11	3	4					9.91253	41.11	3	3	90	10.5373	5.09717
P0A438	Phosphocarrier protein HPr OS=Listeria monocytogenes GN=ptsH - [PTHP_LISMO]	0	0	0	3.69865e+08	0	1.57463e+08		>	>													5.25875	27.27	2	2					8.3645	40.91	3	3	88	9.39786	4.80518
Q8Y4A4	Homoserine dehydrogenase OS=Listeria monocytogenes GN=hom - [Q8Y4A4_LISMO]	5.25688e+08	1.05089e+09	2.1123e+08	1.17729e+09	7.5334e+07	3.88903e+08	1.99907	5.57349	5.16238	25.7889	22.66	7	8	43.4055	25.23	7	11	30.7915	16.36	5	8	62.6462	16.36	5	17	32.1722	19.16	6	9	51.6026	19.86	6	14	428	46.3128	5.26221
Q8Y6P3	CitB protein OS=Listeria monocytogenes GN=citB - [Q8Y6P3_LISMO]	1.02695e+09	2.38402e+09	3.88294e+08	2.10664e+09	1.29403e+08	8.02253e+08	2.32146	5.42537	6.19963	59.8008	25.56	16	18	86.5045	32.44	19	27	32.1977	17	10	10	76.8629	34.67	20	25	26.1902	15.22	8	8	71.1752	28.56	16	21	900	98.2451	4.99561
Q8Y5W6	Cytidylate kinase OS=Listeria monocytogenes GN=cmk - [KCY_LISMO]	2.71014e+08	2955232830	9.21003e+07	8.16336e+08	0	9.45704e+08	10.9043	8.86355	>	11.0216	17.41	2	4	24.5155	25.89	5	8	4.64005	8.48	2	2	15.1467	29.02	4	5					25.3776	40.63	6	8	224	24.8021	6.25244
Q8Y6C9	ATP-dependent DNA helicase OS=Listeria monocytogenes GN=pcrA - [Q8Y6C9_LISMO]	4.38917e+08	8.80374e+08	4.64243e+07	6.02852e+08	5.46127e+07	3.02016e+08	2.00579	12.9857	5.53013	19.6659	14.77	6	7	41.1083	27.77	11	15	12.2208	5.2	3	4	33.0457	25.31	10	11	8.85787	7.52	3	3	23.0888	14.64	6	7	731	83.1118	5.85889
Q8Y835	dTDP-glucose 4,6-dehydratase OS=Listeria monocytogenes GN=lmo1083 - [Q8Y835_LISMO]	2.15465e+09	2.11541e+09	5.68199e+08	1.80719e+09	9.35e+07	6.12219e+08	0.981791	3.18056	6.5478	28.9932	32.32	5	8	24.9557	33.84	6	7	27.4587	32.32	5	8	58.0343	33.84	6	15	22.7794	25.3	4	6	19.5897	32.32	5	5	328	36.8786	5.33838
P21171	Protein p60 OS=Listeria monocytogenes GN=iap - [P60_LISMO]	0	7.80606e+08	1.08905e+07	3.87606e+08	7.30095e+06	2.29443e+08	>	35.5912	31.4264					45.8607	24.38	10	13	5.28512	5.99	2	2	37.2038	23.97	8	12	4.98712	5.99	2	2	30.4139	25.41	9	10	484	50.5563	9.30518
Q8Y4A2	UDP-N-acetylglucosamine 1-carboxyvinyltransferase 2 OS=Listeria monocytogenes GN=murA2 - [MURA2_LISMO]	0	4.59494e+08	5.08701e+07	3.20326e+08	0	1.63751e+08	>	6.29694	>					17.5094	31.68	6	6	4.81917	9.93	2	2	13.4058	20.8	4	4					14.3956	22.7	5	5	423	45.076	6.46826
Q8Y8S1	Lmo0823 protein OS=Listeria monocytogenes GN=lmo0823 - [Q8Y8S1_LISMO]	1.87023e+09	1.24095e+09	1.31627e+08	546670765	0	1.579e+08	0.66353	4.15317	>	7.72088	8.03	2	3	17.5506	34.31	5	6	5.41847	13.14	2	2	11.8391	17.88	3	4					5.39539	8.76	2	2	274	31.0569	5.26221
Q8Y791	Lmo1401 protein OS=Listeria monocytogenes GN=lmo1401 - [Q8Y791_LISMO]	6.46717e+08	7.24006e+08	2.23974e+08	4.70181e+08	5.28732e+07	2.57643e+08	1.11951	2.09926	4.87286	12.1398	22.47	4	4	9.02445	19.1	3	3	12.2079	27.72	4	4	16.8213	30.71	4	6	11.7293	19.1	3	4	10.5969	28.09	4	4	267	29.8803	5.70654
Q8YAA3	50S ribosomal protein L7/L12 OS=Listeria monocytogenes GN=rplL - [RL7_LISMO]	527388106	1.03319e+09	1.69578e+08	5.67028e+08	6.27548e+07	3.01665e+08	1.95907	3.34375	4.80704	9.27767	30	3	3	12.1438	30	3	4	10.0104	30	3	3	9.14429	30	3	3	6.56531	20	2	2	9.71307	30	3	3	120	12.4617	4.55127
Q8Y766	Dihydrodipicolinate synthase OS=Listeria monocytogenes GN=dapA - [DAPA_LISMO]	1.21255e+08	4.28554e+08	7.81346e+07	2.09609e+08	3.54721e+07	1.16472e+08	3.53431	2.68267	3.28349	9.53958	18.09	3	3	29.1441	32.08	7	10	9.21968	13.99	2	3	14.5878	28.67	5	5	5.8227	13.99	2	2	15.5068	27.99	5	5	293	31.3886	6.16357
Q8Y837	Glucose-1-phosphate thymidylyltransferase OS=Listeria monocytogenes GN=lmo1081 - [Q8Y837_LISMO]	9.61851e+08	6.30951e+09	1.47152e+08	2.72407e+09	9.27462e+07	8.95104e+08	6.55975	18.5119	9.65112	19.7697	25.69	4	6	32.6903	29.17	7	11	11.7894	25.35	4	4	34.9476	29.51	7	11	8.66945	17.36	3	3	27.1108	25.69	5	8	288	32.2097	4.97021
Q8YA10	Lmo0356 protein OS=Listeria monocytogenes GN=lmo0356 - [Q8YA10_LISMO]	1466623846	1.63682e+09	1.27733e+08	8.95372e+08	1.07785e+08	3.76342e+08	1.11604	7.00969	3.49161	20.7342	24.26	5	6	19.6837	28.7	5	6	18.3888	21.01	4	5	21.3278	20.71	4	6	13.7783	13.61	4	5	16.7958	13.61	4	6	338	39.4166	5.35107
Q8Y6Z9	S-adenosylmethionine:tRNA ribosyltransferase-isomerase OS=Listeria monocytogenes GN=queA - [QUEA_LISMO]	2.6527e+08	2.24151e+08	8.0696e+07	1.96528e+08	3.80891e+07	1.04106e+08	0.844993	2.43542	2.73321	5.39922	7.89	2	2	17.9567	23.39	5	6	8.70517	15.2	3	3	5.75678	7.89	2	2	8.30688	15.2	3	3	13.3244	19.59	4	5	342	38.2357	5.24951
Q8Y3Y7	Lmo2692 protein OS=Listeria monocytogenes GN=lmo2692 - [Q8Y3Y7_LISMO]	2919129447	7.32383e+09	1301015757	5.11077e+09	5.26856e+08	2.36595e+09	2.50891	3.92829	4.4907	9.80675	39.45	2	3	14.1028	39.45	2	4	20.1741	39.45	2	6	17.0469	39.45	2	5	17.54	39.45	2	5	28.7688	39.45	2	8	109	11.806	5.12256
Q8Y441	50S ribosomal protein L23 OS=Listeria monocytogenes GN=rplW - [RL23_LISMO]	1.96013e+08	3.96447e+08	0	1.80638e+08	0	135778024	2.02255	>	>	9.82047	39.36	3	3	12.1682	27.66	3	3					9.20255	39.36	3	3					10.8509	27.66	3	3	94	10.9088	9.5835
Q8Y4A7	Thymidine kinase OS=Listeria monocytogenes GN=tdk - [KITH_LISMO]	3.97546e+08	693107565	3.88716e+08	8.62075e+08	107563462	232428513	1.74347	2.21775	2.16085	13.1391	14.14	2	4	12.7687	34.03	4	4	9.55251	14.14	2	3	9.07421	14.14	2	3	5.85152	14.14	2	2	6.29471	14.14	2	2	191	21.8632	7.32764
Q8Y6D0	DNA ligase OS=Listeria monocytogenes GN=ligA - [DNLJ_LISMO]	4.58966e+08	1.77547e+09	9.82511e+07	5.07674e+08	5.54228e+07	5.02254e+08	3.86842	5.16711	9.06222	22.6575	15.05	7	8	40.8898	22.06	12	14	18.3787	13.26	6	6	35.3085	21.61	11	12	15.3188	8.49	4	5	21.2419	14.75	7	7	671	74.8084	5.0083
Q8Y8E9	Lmo0955 protein OS=Listeria monocytogenes GN=lmo0955 - [Q8Y8E9_LISMO]	0	4.22504e+08	0	2.75809e+08	0	1.19509e+08	>	>	>					20.7485	27.05	5	6					9.75082	16.37	3	3					10.0381	15.66	3	3	281	33.6568	5.2876
Q8Y4F3	Lmo2491 protein OS=Listeria monocytogenes GN=lmo2491 - [Q8Y4F3_LISMO]	3.94211e+08	6.62708e+08	2.15523e+08	463304595	0	1.44088e+08	1.6811	2.14967	>	8.58926	15.81	2	2	8.13317	15.81	2	2	6.58872	13.49	2	2	14.9708	33.02	4	5					24.8722	21.86	3	6	215	24.9045	4.85596
Q8Y6E8	Lmo1739 protein OS=Listeria monocytogenes GN=lmo1739 - [Q8Y6E8_LISMO]	0	1.83875e+08	0	0	0	0	>							11.8344	32.56	4	4																	215	23.5857	6.15088
Q8YAN9	Lmo0078 protein OS=Listeria monocytogenes GN=lmo0078 - [Q8YAN9_LISMO]	1.0982e+09	844627221	2.78985e+08	6.60707e+08	1.97357e+08	3.28902e+08	0.769103	2.36825	1.66653	23.4875	30.5	6	6	28.303	30.5	6	7	25.807	25.79	5	7	15.2792	20.75	4	4	23.3275	25.79	5	6	17.0728	25.79	5	5	318	33.8299	5.56689
Q8Y478	Lmo2577 protein OS=Listeria monocytogenes GN=lmo2577 - [Q8Y478_LISMO]	0	3.3463e+08	6.15577e+07	3.17431e+08	3.34695e+07	122549177	>	5.15665	3.66151					16.8523	22.55	4	5	7.47966	13.45	2	2	7.00259	13.45	2	2	13.6545	16.73	3	4	13.3192	16.73	3	4	275	30.2799	4.80518
Q8Y5X8	Histidinol-phosphate aminotransferase OS=Listeria monocytogenes GN=hisC - [HIS8_LISMO]	3.46274e+08	5.57818e+08	1.30342e+08	0	0	0	1.61091			9.2727	13.33	3	3	9.06704	17.5	3	3	5.55637	10.56	2	2													360	40.0871	5.31299
Q8YAV7	DNA gyrase subunit B OS=Listeria monocytogenes GN=gyrB - [Q8YAV7_LISMO]	3.71411e+09	1.6801e+09	4.40811e+08	1.03219e+09	5.33561e+08	5.57716e+08	0.452355	2.34158	1.04527	50.9671	28.17	10	15	37.2936	26.63	8	12	45.0029	26.63	9	14	35.8618	22.29	7	12	36.3519	18.11	7	12	40.2887	18.42	7	12	646	72.7688	5.50342
Q8Y7E4	Lmo1339 protein OS=Listeria monocytogenes GN=lmo1339 - [Q8Y7E4_LISMO]	5.87713e+08	1.45465e+09	3.31452e+08	7.99714e+08	9.62701e+07	4.77677e+08	2.47511	2.41276	4.96184	9.05861	13.35	3	3	17.1924	20.5	5	6	20.6616	24.84	5	7	23.1083	24.84	6	8	21.5551	24.84	5	7	23.2378	27.95	6	8	322	33.6913	4.83057
Q8Y4H9	Lmo2462 protein OS=Listeria monocytogenes GN=lmo2462 - [Q8Y4H9_LISMO]	3.12835e+08	302682262	8.50717e+07	2.14608e+08	6.18959e+07	1.5266e+08	0.967546	2.52268	2.4664	18.4742	32.14	6	6	12.306	16.88	3	4	6.30107	10.71	2	2	7.62607	15.26	3	3	5.46901	6.82	2	2	10.6997	12.34	3	4	308	34.7367	5.87158
Q8Y4P6	Lmo2389 protein OS=Listeria monocytogenes GN=lmo2389 - [Q8Y4P6_LISMO]	1.98323e+09	1.55557e+09	5.45426e+08	1.17908e+09	9.05302e+07	7.1509e+08	0.784362	2.16175	7.89891	43.4465	25.56	11	14	56.7397	23.57	10	17	83.189	32.75	12	27	57.7851	34.24	11	18	32.6459	25.81	8	10	49.992	26.05	11	15	403	44.0292	6.16357
Q8Y4A5	ThrC protein OS=Listeria monocytogenes GN=thrC - [Q8Y4A5_LISMO]	3.73256e+08	6.54074e+08	2.41019e+08	6.11068e+08	7.98534e+07	1.27321e+08	1.75235	2.53535	1.59443	34.5305	32.48	5	9	30.1289	26.78	5	7	27.226	18.23	4	7	28.7869	15.67	3	6	32.2188	26.78	5	8	31.5765	15.67	3	6	351	36.9399	5.43994
Q8Y5Y2	UPF0302 protein lmo1921 OS=Listeria monocytogenes GN=lmo1921 - [Y1921_LISMO]	1.19929e+08	406920317	2.91709e+08	0	0	9.29439e+07	3.39302		>	5.42037	7.18	2	2	12.6619	27.62	3	4	4.9862	7.18	2	2									7.12276	20.99	2	2	181	21.1975	5.05908
Q8Y435	Lmo2638 protein OS=Listeria monocytogenes GN=lmo2638 - [Q8Y435_LISMO]	2.58232e+10	1.10317e+10	4.20204e+09	6.453e+09	2.74825e+09	1.86813e+09	0.427199	1.53568	0.679752	679.338	36.15	19	153	260.618	33.12	16	63	846.146	34.87	17	198	279.147	33.92	17	70	730.278	33.28	17	173	132.986	29.62	13	35	628	70.4019	7.03467
Q8Y7G2	Prolyl-tRNA synthetase OS=Listeria monocytogenes GN=proS - [SYP_LISMO]	7.99283e+08	1.30342e+09	4.34009e+08	1.24705e+09	9.8852e+07	3.74719e+08	1.63074	2.87334	3.79071	41.7363	19.54	8	12	38.2031	23.06	8	12	35.4824	20.42	7	11	42.6364	28.52	10	13	26.6748	18.49	7	9	44.6001	23.06	8	14	568	63.3133	4.90674
Q8Y9B9	Lmo0613 protein OS=Listeria monocytogenes GN=lmo0613 - [Q8Y9B9_LISMO]	0	1.60939e+09	0	9.75737e+08	0	9.23993e+08	>	>	>					23.4562	31.63	7	8					23.7945	29.39	6	8					26.254	37.7	8	9	313	33.9187	5.2749
Q92D14	Lmo1008 protein OS=Listeria monocytogenes GN=lmo1008 - [Q92D14_LISMO]	4.8084e+08	2.76655e+08	6.30822e+07	4.69194e+08	6.12262e+07	0	0.575356	7.43783		13.0256	37.66	3	4	15.4276	37.66	3	5	8.72088	24.68	2	3	5.5837	37.66	2	2	6.1409	24.68	2	2					77	8.95021	4.31006
Q8Y5M4	FtsA protein OS=Listeria monocytogenes GN=ftsA - [Q8Y5M4_LISMO]	7.89319e+08	1.78843e+09	3.07642e+08	1.66678e+09	1.39334e+08	6.84522e+08	2.26578	5.4179	4.91282	26.2683	28.87	5	8	71.4341	35.68	8	18	18.0043	19.25	3	5	28.7261	22.54	4	7	13.4543	15.96	3	4	48.3443	35.68	6	11	426	45.9015	4.7417
Q8Y7C7	Acetyl-CoA carboxylase subunit (Biotin carboxylase subunit) OS=Listeria monocytogenes GN=lmo1357 - [Q8Y7C7_LISMO]	3.3274e+09	3.91145e+09	1.48296e+09	3.07696e+09	4.00928e+08	1.19779e+09	1.17553	2.07487	2.98754	35.4843	34.58	11	11	28.2054	29.07	8	8	22.7701	25.77	7	7	46.1779	29.74	9	13	19.044	20.26	6	6	25.8181	25.55	7	8	454	49.8974	5.47803
Q8Y729	5'-methylthioadenosine/S-adenosylhomocysteine nucleosidase OS=Listeria monocytogenes GN=mtnN - [MTNN_LISMO]	6.00372e+08	1.38842e+09	0	5.15821e+08	0	3.63887e+08	2.3126	>	>	8.78062	11.59	2	3	15.1874	18.03	3	5					8.06643	15.02	3	3					13.1864	21.89	4	5	233	25.365	4.58936
Q8Y7D4	Probable glycine dehydrogenase [decarboxylating] subunit 1 OS=Listeria monocytogenes GN=gcvPA - [GCSPA_LISMO]	2.32573e+08	9.97421e+08	1.13476e+08	8.29315e+08	5.70081e+07	2.77361e+08	4.28863	7.30829	4.86529	11.2683	11.16	4	4	32.4323	30.36	8	9	16.9766	12.28	4	5	27.5175	23.66	7	8	13.364	12.28	4	4	26.8798	18.08	7	8	448	49.4473	5.73193
Q8Y8G9	Putative tRNA (cytidine/uridine-2'-O-)-methyltransferase lmo0935 OS=Listeria monocytogenes GN=lmo0935 - [Q8Y8G9_LISMO]	6.01722e+08	5.02736e+08	1.00154e+08	0	8.13805e+07	1.14309e+08	0.835494		1.40463	13.1359	20.71	4	4	9.07247	20.71	3	3	9.55448	15.98	3	3					9.78227	15.98	3	3	9.66732	15.98	3	3	169	19.5935	4.91943
Q8Y626	Thymidylate synthase OS=Listeria monocytogenes GN=thyA - [TYSY_LISMO]	7.51932e+08	4.7735e+09	2.22136e+08	3.00345e+09	1.29196e+08	1.28169e+09	6.34832	13.5207	9.92048	24.531	22.29	4	7	64.9487	37.26	8	18	18.6971	22.29	4	5	71.1827	28.03	7	20	23.5367	22.29	4	6	47.1642	35.67	7	13	314	36.1402	5.35107
Q8Y641	Peptide methionine sulfoxide reductase MsrB OS=Listeria monocytogenes GN=msrB - [MSRB_LISMO]	2.86079e+08	1543504376	0	6.7056e+08	0	6.47426e+08	5.39539	>	>	7.35368	24.14	2	2	12.6159	24.14	2	3					22.9062	37.24	3	6					19.1555	37.24	3	5	145	16.5111	5.0083
Q8Y5A1	Lmo2168 protein OS=Listeria monocytogenes GN=lmo2168 - [Q8Y5A1_LISMO]	0	8.46229e+08	0	6.15472e+08	0	2.09319e+08	>	>	>					12.9463	37.21	3	4					5.60588	18.6	2	2					12.2886	37.21	3	4	129	14.7413	4.75439
Q8Y4T0	Lmo2352 protein OS=Listeria monocytogenes GN=lmo2352 - [Q8Y4T0_LISMO]	0	8.49027e+08	0	2.75625e+08	0	3.28462e+08	>	>	>					9.86321	19.4	3	3					4.73995	7.69	2	2					5.84094	9.7	2	2	299	34.0776	5.87158
Q8Y7D3	Probable glycine dehydrogenase [decarboxylating] subunit 2 OS=Listeria monocytogenes GN=gcvPB - [GCSPB_LISMO]	8.78789e+08	1.32429e+09	3.76493e+08	1.08227e+09	1.63035e+08	5.01413e+08	1.50695	2.87462	3.0755	38.412	31.15	10	12	34.7631	24.59	7	10	25.2395	24.39	6	8	33.8952	26.02	8	11	26.8747	30.33	8	9	38.4199	23.36	7	11	488	54.1635	5.63037
Q8Y6V8	Acetyl-coenzyme A carboxylase carboxyl transferase subunit beta OS=Listeria monocytogenes GN=accD - [ACCD_LISMO]	2.44714e+08	3.6619e+08	8.4703e+07	0	0	1.03255e+08	1.4964		>	11.9678	19.73	3	4	8.85025	19.73	3	3	5.33591	12.93	2	2									8.38496	12.93	3	3	294	31.9971	6.44287
Q8Y5Z6	Dihydrodipicolinate reductase OS=Listeria monocytogenes GN=dapB - [DAPB_LISMO]	6.83397e+08	1.09868e+09	1.51311e+08	8.30788e+08	1.3366e+08	2.52908e+08	1.60767	5.49061	1.89218	7.81991	12.17	2	2	10.9152	12.17	2	3	13.6337	12.17	2	3	10.5831	12.17	2	3	17.0525	12.17	2	4	11.1775	17.49	3	3	263	28.8819	5.30029
Q8Y5Q0	AlsS protein OS=Listeria monocytogenes GN=alsS - [Q8Y5Q0_LISMO]	1.15289e+09	1.39459e+09	2.39308e+08	9.374e+08	1.49341e+08	4.8875e+08	1.20965	3.91713	3.27271	48.3528	26.73	8	14	45.959	24.07	7	13	47.705	24.07	7	15	49.7426	26.02	7	14	35.8537	23.54	6	11	38.1657	26.73	8	12	565	61.6733	5.61768
Q8Y4R7	Glucose-6-phosphate isomerase OS=Listeria monocytogenes GN=pgi - [G6PI_LISMO]	545563904	432804007	0	3.66681e+08	0	1.33408e+08	0.793315	>	>	4.78949	7.11	2	2	17.4649	18.67	4	5					22.5177	27.33	6	7					15.3872	11.78	3	5	450	49.8655	5.42725
Q8Y651	Manganese transport system ATP-binding protein MntB OS=Listeria monocytogenes GN=mntB - [MNTB_LISMO]	0	5.29858e+08	0	2.68918e+08	0	1.40621e+08	>	>	>					22.7014	23.75	5	6					12.2796	14.17	3	3					10.1572	14.17	3	3	240	26.4783	9.12939
Q8Y621	Lmo1881 protein OS=Listeria monocytogenes GN=lmo1881 - [Q8Y621_LISMO]	1.02144e+08	5.97985e+08	7.90035e+07	6.79836e+08	3.30126e+07	1.62077e+08	5.85432	8.60514	4.90955	8.27491	11.72	2	2	14.7963	24.14	4	4	8.446	11.72	2	2	14.706	23.1	4	4	9.37095	11.72	2	3	15.2802	22.76	4	4	290	32.4003	4.93213
Q8Y7J4	Lmo1283 protein OS=Listeria monocytogenes GN=lmo1283 - [Q8Y7J4_LISMO]	4.43258e+08	5.65086e+08	1.82324e+08	437956329	1.02921e+08	2.13024e+08	1.27485	2.40208	2.06978	12.9328	13.45	4	4	17.5657	22.76	6	6	12.8672	17.59	4	4	16.029	18.97	5	6	8.58067	8.62	2	3	14.1584	21.03	5	5	290	33.0516	4.85596
Q8Y557	Foldase protein prsA 2 OS=Listeria monocytogenes GN=prsA2 - [PRSA2_LISMO]	0	2.28887e+09	0	8.0594e+08	0	4.81052e+08	>	>	>					47.6363	34.13	7	12					26.9363	31.06	7	8					36.517	36.52	8	10	293	32.6774	5.93506
Q8Y765	Aspartokinase OS=Listeria monocytogenes GN=lmo1436 - [Q8Y765_LISMO]	7.68578e+08	2.25306e+09	9.44081e+07	1.93758e+09	2.69221e+08	5.99124e+08	2.93146	20.5234	2.2254	16.8474	19.11	4	5	44.2611	34	8	13	14.6147	13.15	3	4	50.1525	33	9	14	13.8746	13.15	3	4	34.8842	29.53	7	10	403	43.0546	6.30322
Q8Y4H1	NADPH dehydrogenase OS=Listeria monocytogenes GN=namA - [NAMA_LISMO]	1.11244e+09	0	0	1.14423e+09	0	0		>		6.42455	8.28	2	2									5.75508	16.57	2	2									338	36.9824	6.87354
Q8Y493	Arginyl-tRNA synthetase OS=Listeria monocytogenes GN=argS - [SYR_LISMO]	9.91861e+08	4.86307e+08	3.28594e+08	4.49505e+08	1.80699e+08	1.94086e+08	0.490298	1.36796	1.07408	33.8299	22.3	9	10	16.9994	14.03	5	5	55.4676	25.54	9	14	27.7092	17.09	6	8	44.2932	19.96	8	12	22.519	19.06	7	8	556	62.797	5.19873
Q8Y5Y0	3-phosphoshikimate 1-carboxyvinyltransferase OS=Listeria monocytogenes GN=aroA - [AROA_LISMO]	1.0214e+09	7.50996e+08	1.43708e+08	3.34469e+08	125291408	1.21436e+08	0.735262	2.32742	0.969232	35.0441	26.4	8	10	26.4632	26.17	8	8	16.9019	17.52	5	5	28.1872	25.93	8	9	25.6041	26.64	7	7	25.6112	22.66	6	7	428	46.0481	6.18896
P33380	L-lactate dehydrogenase 1 OS=Listeria monocytogenes GN=ldh1 - [LDH1_LISMO]	1082300902	9.63274e+08	2.19561e+08	9.47432e+08	9.14052e+07	2.64796e+08	0.890024	4.31512	2.89694	33.2729	32.91	11	11	25.6167	20.13	8	8	24.2123	20.13	8	8	23.0049	20.77	5	7	32.1535	22.68	8	10	14.5162	15.02	5	5	313	34.1703	5.42725
Q926X1	Lmo2779 protein OS=Listeria monocytogenes GN=lmo2779 - [Q926X1_LISMO]	941842464	1.60636e+09	2.65654e+08	1.59246e+09	1.62532e+08	5.81281e+08	1.70555	5.99448	3.57642	17.7812	17.21	5	6	30.0938	27.6	7	9	19.3083	16.67	5	6	30.2369	24.59	7	9	10.1541	8.2	3	3	25.0942	27.6	7	8	366	40.658	4.89404
Q8YAR8	Single-stranded DNA-binding protein 1 OS=Listeria monocytogenes GN=ssb1 - [SSB1_LISMO]	8.18807e+08	630899869	0	2.99054e+08	0	0	0.770511	>		7.87042	19.1	2	3	4.78592	13.48	2	2					4.65229	19.1	2	2									178	19.4813	5.13525
Q8Y8P1	D-alanine--D-alanine ligase OS=Listeria monocytogenes GN=ddl - [DDL_LISMO]	4.63732e+08	7.50053e+08	3.4381e+08	1023597270	1.05985e+08	1.55379e+08	1.61743	2.97722	1.46605	30.3988	27.57	7	9	31.1906	27.57	6	9	31.4709	29.73	7	11	18.7817	28.38	6	6	36.3563	27.57	6	11	24.832	27.57	6	7	370	40.6438	4.56396
P13128	Listeriolysin O OS=Listeria monocytogenes GN=hly - [TACY_LISMO]	0	302462727	0	2.96327e+08	0	7.24434e+07	>	>	>					23.5747	22.87	8	8					20.9802	14.74	4	6					12.652	12.1	4	4	529	58.652	7.91357
Q8Y6V9	Acetyl-coenzyme A carboxylase carboxyl transferase subunit alpha OS=Listeria monocytogenes GN=accA - [ACCA_LISMO]	4.70404e+08	3.03716e+08	1.90774e+08	4.55819e+08	1.06161e+08	8.65191e+07	0.645649	2.38932	0.814977	17.5959	19.5	4	5	19.0812	22.33	5	6	16.4879	21.38	4	5	17.6991	24.84	5	6	15.179	20.75	4	5	9.75856	14.15	3	3	318	35.2472	5.90967
P0A2X5	Adenine phosphoribosyltransferase OS=Listeria monocytogenes GN=apt - [APT_LISMO]	2.25371e+08	3.2043e+08	1.10712e+08	2.88112e+08	5.82207e+07	1.25634e+08	1.42179	2.60237	2.15789	13.9483	19.08	3	4	16.6332	19.08	3	4	6.21037	8.67	2	2	6.98143	18.5	2	2	6.66765	18.5	2	2	13.7828	19.08	3	4	173	19.1702	5.2876
Q8Y9H0	Lmo0558 protein OS=Listeria monocytogenes GN=lmo0558 - [Q8Y9H0_LISMO]	4.06718e+09	4.79396e+09	9.24196e+08	2.7392e+09	5.19838e+08	1.41224e+09	1.17869	2.96387	2.71669	49.7225	30.35	9	18	39.8235	27.17	8	14	39.7899	30.06	8	14	60.5797	24.57	7	21	33.5764	27.46	7	12	25.5402	27.17	7	10	346	37.3618	5.5542
Q8Y4M3	Lmo2414 protein OS=Listeria monocytogenes GN=lmo2414 - [Q8Y4M3_LISMO]	475325890	1328579810	1.65734e+08	7.9949e+08	8.63615e+07	3.59907e+08	2.79509	4.82393	4.16744	20.9995	21.25	5	6	29.6851	23.56	6	8	21.327	23.33	6	7	37.4814	23.09	6	9	16.3359	20.79	5	5	28.8938	33.26	8	9	433	48.0718	5.93506
Q8YAB1	Cysteinyl-tRNA synthetase OS=Listeria monocytogenes GN=cysS - [SYC_LISMO]	2.95906e+08	8.46133e+08	8.61179e+07	9.41747e+08	3.52042e+07	2.43198e+08	2.85946	10.9356	6.90821	16.7498	12.74	4	4	37.0967	21.87	6	9	12.9884	12.74	3	4	41.3638	21.44	6	13	17.423	12.74	3	5	41.6506	18.05	5	10	471	54.3202	5.07178
Q8Y5E6	Phosphoglucosamine mutase OS=Listeria monocytogenes GN=glmM - [GLMM_LISMO]	4.25666e+08	1.21023e+09	1.34826e+08	7.223e+08	0	2.17445e+08	2.84315	5.35727	>	38.5418	23.33	4	8	50.741	24.44	5	11	32.4811	20.44	3	7	69.1278	33.33	7	17					55.9822	32.44	7	14	450	48.4573	4.81787
Q8Y862	Dihydrolipoyl dehydrogenase OS=Listeria monocytogenes GN=PdhD - [Q8Y862_LISMO]	7.98287e+08	1.61384e+09	3.02446e+08	1.02241e+09	1.48872e+08	5.84992e+08	2.02163	3.38047	3.92949	59.1438	34.05	11	16	57.7057	31.48	10	15	32.1866	24.63	7	10	38.4436	26.98	7	11	32.7343	22.48	6	9	49.3735	29.34	9	13	467	49.4569	5.33838
Q8Y834	Lmo1084 protein OS=Listeria monocytogenes GN=lmo1084 - [Q8Y834_LISMO]	0	2.48929e+08	0	6.66346e+08	7.12933e+07	0	>	>						6.48656	11.96	2	2					11.844	19.2	4	4	4.9323	9.78	2	2					276	31.1509	5.16064
Q8Y6J9	Glutamate-1-semialdehyde 2,1-aminomutase 2 OS=Listeria monocytogenes GN=hemL2 - [GSA2_LISMO]	6.66219e+08	6.62201e+08	2.3144e+08	6.58008e+08	3.36338e+07	1.44674e+08	0.99397	2.8431	4.30143	17.6375	21.76	6	6	7.87954	12.73	3	3	5.82662	7.18	2	2	9.79714	15.28	3	3	6.57551	6.02	2	2	8.69867	13.19	3	3	432	46.0723	5.22412
Q8Y734	Lmo1489 protein OS=Listeria monocytogenes GN=lmo1489 - [Q8Y734_LISMO]	0	0	5.7394e+07	1.36015e+08	4.06897e+07	9.96808e+07		2.36986	2.44978									5.38334	23.96	2	2	5.52853	23.96	2	2	4.99007	23.96	2	2	5.59122	23.96	2	2	96	10.785	9.75928
Q8Y4G9	UPF0042 nucleotide-binding protein lmo2474 OS=Listeria monocytogenes GN=lmo2474 - [Y2474_LISMO]	9.27952e+08	1.23222e+09	2.12356e+08	6.36442e+08	9.64415e+07	2.93703e+08	1.3279	2.99706	3.0454	11.2203	17.18	4	4	16.8153	17.18	4	6	7.81551	7.22	2	3	20.4704	25.43	5	7	12.8116	14.78	4	5	13.2363	19.24	5	5	291	33.5313	6.20166
Q8YAB3	Glutamyl-tRNA synthetase OS=Listeria monocytogenes GN=gltX - [SYE_LISMO]	1.85824e+09	2.59867e+09	5.86511e+08	2.82952e+09	3.70796e+08	6.02967e+08	1.39846	4.82433	1.62614	27.5369	25.05	7	7	38.8531	28.51	9	10	54.0349	30.96	10	15	40.8059	27.09	8	13	56.6613	28.92	9	16	54	26.07	8	14	491	56.0005	5.22412
Q48793	Ribose-phosphate pyrophosphokinase 1 OS=Listeria monocytogenes GN=prs1 - [KPRS1_LISMO]	9.72522e+08	1.34954e+09	5.0842e+07	1.05103e+09	1.66732e+08	5.24389e+08	1.38768	20.6725	3.14511	12.3312	14.15	4	4	9.09456	13.21	3	3	6.97707	9.12	2	2	13.6002	23.9	5	5	6.25629	8.18	2	2	12.342	15.72	4	4	318	35.0473	6.18896
P0A491	50S ribosomal protein L35 OS=Listeria monocytogenes GN=rpmI - [RL35_LISMO]	2.90742e+09	0	0	0	0	0				4.82059	34.85	2	2																					66	7.71526	12.5571
Q48746	Lmo1453 protein OS=Listeria monocytogenes GN=lmo1453 - [Q48746_LISMO]	1.67269e+08	2.30186e+08	0	0	0	1.04493e+08	1.37614		>	23.6048	34.62	4	7	13.4275	29.91	3	4													14.1074	28.21	3	4	234	26.1838	7.44482
Q8Y7F1	Polyribonucleotide nucleotidyltransferase OS=Listeria monocytogenes GN=pnp - [PNP_LISMO]	9.65976e+08	1.45618e+09	4.28375e+08	1.08016e+09	1.09507e+08	407398049	1.50748	2.52153	3.72028	28.9638	15.63	8	9	56.8324	23.93	13	17	36.2492	17.15	8	11	39.7994	22.96	10	12	25.7929	10.93	5	7	34.448	14.38	7	10	723	79.5524	5.32568
Q8Y4I0	Lmo2460 protein OS=Listeria monocytogenes GN=lmo2460 - [Q8Y4I0_LISMO]	0	8.594e+07	0	9.89913e+07	0	0	>	>						12.0067	22.7	3	3					19.613	18.97	3	4									348	38.3131	7.95752
Q8Y7I0	Glutamine synthetase OS=Listeria monocytogenes GN=glnA - [Q8Y7I0_LISMO]	3593247830	1209022466	6.69002e+08	1.02658e+09	4.34578e+08	3.13289e+08	0.336471	1.5345	0.720905	51.3369	25.45	9	16	32.0909	28.83	8	10	53.5936	25.45	10	17	26.9865	21.62	7	8	32.8927	22.3	7	10	24.8641	24.77	7	8	444	50.4293	5.08447
Q926W7	Partition protein, ParA homolog OS=Listeria monocytogenes GN=parA - [Q926W7_LISMO]	1.32557e+08	5.27547e+08	0	416023410	0	1.01843e+08	3.97978	>	>	16.9514	13.04	2	5	23.694	26.48	4	8					25.8683	19.37	3	8					20.3906	22.53	3	7	253	27.4537	5.22412
Q9RLT9	DNA-directed RNA polymerase subunit beta OS=Listeria monocytogenes GN=rpoB - [RPOB_LISMO]	3.57687e+09	2.50927e+09	9.92078e+08	2.17853e+09	5.13562e+08	4.71423e+08	0.701527	2.19593	0.917946	92.6449	26.35	21	29	62.6389	24.66	17	20	70.4809	25.25	16	23	69.7435	23.65	18	22	63.5433	21.79	15	19	33.9831	16.81	11	11	1184	132.521	5.17334
Q8YAD3	50S ribosomal protein L25 OS=Listeria monocytogenes GN=rplY - [RL25_LISMO]	0	6.76897e+08	0	4.63911e+08	0	2.964e+08	>	>	>					22.7851	34.3	4	7					8.98954	22.71	2	3					9.36424	29.95	3	3	207	22.6406	4.50049
Q8Y7B3	Lmo1373 protein OS=Listeria monocytogenes GN=lmo1373 - [Q8Y7B3_LISMO]	3.61042e+08	1.96794e+09	1.35699e+08	1.36968e+09	1.68654e+08	6.60392e+08	5.45073	10.0935	3.91567	11.0513	13.15	3	4	16.525	15.9	5	6	14.5279	17.13	4	5	23.5166	20.49	6	8	21.1821	25.08	6	7	19.3341	20.49	6	7	327	35.7143	4.93213
Q8Y7N7	Glutamate racemase OS=Listeria monocytogenes GN=murI - [MURI_LISMO]	3.16101e+08	1.07568e+09	1.72231e+08	1.38202e+09	7.40278e+07	3.16261e+08	3.40297	8.02418	4.27219	9.49223	19.55	3	3	21.0143	34.21	6	7	8.91198	19.55	3	3	23.4113	34.21	7	8	8.31606	19.55	3	3	22.8398	34.21	7	8	266	29.1412	6.15088
Q8Y789	DNA mismatch repair protein mutS OS=Listeria monocytogenes GN=mutS - [MUTS_LISMO]	1.14447e+09	8.98994e+08	2.26209e+08	6.32032e+08	1.52311e+08	3.10494e+08	0.785512	2.79401	2.03855	45.4114	15.58	8	14	44.9683	16.05	8	13	32.5505	17.21	9	11	40.2631	18.14	10	13	35.9204	17.44	9	11	37.6906	16.28	8	11	860	98.1422	5.41455
Q9RE04	P45 OS=Listeria monocytogenes GN=spl - [Q9RE04_LISMO]	0	5.85339e+08	0	520617397	0	1.25834e+08	>	>	>					47.5525	29.93	7	12					50.1191	33.92	10	12					34.5849	29.93	7	10	401	42.6857	8.54346
Q8Y730	Lmo1493 protein OS=Listeria monocytogenes GN=lmo1493 - [Q8Y730_LISMO]	3.65139e+09	2.39332e+09	6.70732e+08	1755117457	7.03919e+08	8.45458e+08	0.655454	2.61672	1.20107	73.2339	33.06	13	21	47.1374	25.91	10	13	58.9017	27.41	11	15	50.1377	25.75	9	15	50.2827	29.07	11	14	56.0864	25.91	10	17	602	68.7511	4.89404
Q8Y5S9	Lmo1976 protein OS=Listeria monocytogenes GN=lmo1976 - [Q8Y5S9_LISMO]	0	8.44733e+07	0	0	0	5.02491e+07	>		>					15.1112	22.05	3	4													8.78876	17.11	2	2	263	29.0164	9.24658
Q8Y840	Lmo1078 protein OS=Listeria monocytogenes GN=lmo1078 - [Q8Y840_LISMO]	4.36342e+08	7.29707e+08	117227694	7.21743e+08	3.70832e+07	1.65725e+08	1.67233	6.15676	4.46901	11.5817	17.24	3	3	10.5609	17.24	3	3	11.1801	17.24	3	3	34.0838	24.48	4	8	8.78165	13.79	2	2	16.6319	17.24	3	4	290	32.4531	5.14795
Q8Y6Q0	Lmo1634 protein OS=Listeria monocytogenes GN=lmo1634 - [Q8Y6Q0_LISMO]	1.22259e+09	6.93113e+08	3.89791e+08	4.2298e+08	2.48604e+08	1.81229e+08	0.566922	1.08515	0.728986	49.5472	21.48	10	14	42.5808	20.09	9	12	63.8729	22.17	11	18	48.8088	22.17	11	14	58.7742	21.25	10	17	35.6833	20.79	9	11	866	94.6219	6.93213
Q8Y6Z4	Lmo1536 protein OS=Listeria monocytogenes GN=lmo1536 - [Q8Y6Z4_LISMO]	1.75627e+08	2.91267e+08	0	1.25848e+08	0	0	1.65844	>		6.67846	11.7	2	2	11.6164	29.08	4	4					6.75173	11.7	2	2									282	31.0652	6.06201
Q9S5A6	Heat-inducible transcription repressor hrcA OS=Listeria monocytogenes GN=hrcA - [HRCA_LISMO]	0	2.28342e+08	0	2.84351e+08	0	1.52651e+08	>	>	>					10.9528	20	4	4					7.19417	8.7	2	2					16.2499	24.64	5	5	345	39.6561	5.57959
Q9LAT7	Lmo2196 protein OS=Listeria monocytogenes GN=oppA - [Q9LAT7_LISMO]	172056852	8.4294e+08	9.25034e+07	6.28541e+08	0	2.09652e+08	4.89919	6.79479	>	6.38026	4.48	2	2	19.9778	13.26	5	5	10.8308	10.93	4	4	20.3733	13.08	5	6					24.1184	17.74	7	7	558	62.5486	5.49072
Q8Y700	Queuine tRNA-ribosyltransferase OS=Listeria monocytogenes GN=tgt - [TGT_LISMO]	515751514	6.3374e+08	1.13254e+08	1076629089	1.49487e+08	2.58729e+08	1.22877	9.50631	1.73078	21.4434	27.97	5	6	8.71242	12.93	2	2	15.3823	18.73	3	4	11.43	12.93	2	3	9.48421	13.46	2	3	9.45421	12.93	2	2	379	42.8935	7.54736
Q8Y860	Lmo1057 protein OS=Listeria monocytogenes GN=lmo1057 - [Q8Y860_LISMO]	5.60901e+08	1.02669e+09	0	5.87421e+08	0	3.28082e+08	1.83043	>	>	28.8864	23.34	5	9	37.845	28.71	6	11					24.5847	28.71	5	7					29.5665	28.71	6	9	317	35.2417	5.60498
P60384	Redox-sensing transcriptional repressor rex OS=Listeria monocytogenes GN=rex - [REX_LISMO]	0	6.6695e+08	1.7801e+07	3.21834e+08	0	162229150	>	18.0796	>					12.7708	27.91	4	4	5.49931	10.7	2	2	9.36484	23.26	3	3					13.3075	27.91	4	4	215	24.1846	6.12549
Q9AGE7	10 kDa chaperonin OS=Listeria monocytogenes GN=groS - [CH10_LISMO]	0	9.8297e+08	0	0	0	0	>							5.34731	32.98	2	2																	94	10.0583	4.67822
Q8Y8J5	Lmo0906 protein OS=Listeria monocytogenes GN=lmo0906 - [Q8Y8J5_LISMO]	6.97698e+08	7.412e+08	2.68545e+08	4.00565e+08	1.433e+08	7.54231e+07	1.06235	1.49161	0.526329	21.7618	23.39	5	7	11.6945	22.27	4	4	19.8828	21.38	4	6	14.6911	15.37	3	4	21.124	18.04	4	6	6.73574	12.92	2	2	449	48.964	5.99854
Q8YAC6	ATP-dependent zinc metalloprotease FtsH 1 OS=Listeria monocytogenes GN=ftsH - [Q8YAC6_LISMO]	4.70207e+08	8.84896e+08	7.75805e+07	5.34819e+08	4.73507e+07	1.76043e+08	1.88193	6.89373	3.71785	16.777	12.45	5	5	30.9772	21.56	8	9	11.8612	8.68	4	4	28.5287	17.8	7	8	5.62571	4.34	2	2	19.3364	10.13	4	5	691	76.1909	5.10986
Q927L7	50S ribosomal protein L14 OS=Listeria monocytogenes GN=rplN - [RL14_LISMO]	1.87185e+09	2.1578e+08	1.88908e+08	1.23322e+09	3.17914e+08	0	0.115276	6.52814		10.5384	30.33	3	4	9.95636	30.33	3	4	8.28041	19.67	2	3	10.2277	22.13	2	4	8.55774	19.67	2	3					122	13.2181	9.99365
Q8Y6H5	Methionine aminopeptidase OS=Listeria monocytogenes GN=lmo1709 - [Q8Y6H5_LISMO]	0	1.17056e+09	0	7.92454e+08	0	0	>	>						7.12954	18.25	2	2					12.2228	15.08	2	4									252	27.865	5.61768
Q8Y6W6	DNA polymerase I OS=Listeria monocytogenes GN=polA - [Q8Y6W6_LISMO]	6.06819e+08	8.0437e+08	1.77342e+08	1090863119	8.0681e+07	4.74202e+08	1.32555	6.1512	5.8775	46.7324	22.17	11	14	48.1598	22.51	13	14	21.5633	14.06	7	7	37.1009	20	10	12	16.4059	10.17	5	5	47.5186	28.11	15	16	875	98.3868	5.21143
Q8Y8K9	RsbR protein OS=Listeria monocytogenes GN=RsbR - [Q8Y8K9_LISMO]	3.61649e+08	7.59321e+08	8.13609e+07	1013735429	1.12161e+08	3.96771e+08	2.09961	12.4597	3.53752	15.3438	19.06	4	5	17.6365	22.3	5	5	13.5588	14.75	3	4	12.534	18.35	4	4	10.1794	10.07	2	3	18.3798	24.46	5	5	278	31.6004	4.93213
Q8Y9T0	Lmo0443 protein OS=Listeria monocytogenes GN=lmo0443 - [Q8Y9T0_LISMO]	0	4.07592e+08	0	2.10816e+08	0	4.56877e+07	>	>	>					24.2076	19.09	4	7					11.526	10.03	2	3					21.9957	15.86	3	6	309	34.1239	9.05615
Q8Y688	Phosphate acyltransferase OS=Listeria monocytogenes GN=plsX - [PLSX_LISMO]	4.2319e+08	8.91009e+08	1.01916e+08	1.5138e+09	5.33284e+07	1.71418e+08	2.10546	14.8534	3.21438	17.2532	20.77	5	6	17.852	20.77	5	6	8.03916	11.57	3	3	16.0612	20.77	5	6	8.29984	8.01	2	3	12.5189	17.21	4	4	337	36.384	7.41553
Q8Y606	AspB protein OS=Listeria monocytogenes GN=aspB - [Q8Y606_LISMO]	1.46105e+08	7.26834e+08	3.54517e+07	1.94441e+08	1.77194e+07	3.65229e+07	4.97475	5.48468	2.06118	21.2617	21.37	5	5	33.0416	32.32	7	8	31.0093	18.07	4	7	23.0159	16.79	4	5	21.0058	16.54	3	5	15.9127	12.47	4	4	393	43.3313	5.52881
Q8Y8T3	Lmo0811 protein OS=Listeria monocytogenes GN=lmo0811 - [Q8Y8T3_LISMO]	3.50434e+08	1.71361e+09	7.55324e+07	9.92851e+08	0	5.67977e+08	4.88996	13.1447	>	14.7618	23.61	4	5	11.0998	20.17	4	4	7.61658	18.45	3	3	8.33575	20.17	3	3					9.14847	20.17	3	3	233	27.2323	4.97021
Q927L6	30S ribosomal protein S17 OS=Listeria monocytogenes GN=rpsQ - [RS17_LISMO]	0	5.46744e+08	0	0	0	1.65364e+08	>		>					4.49164	32.18	2	2													4.74067	32.18	2	2	87	10.0294	9.89111
Q8Y449	Adenylate kinase OS=Listeria monocytogenes GN=adk - [KAD_LISMO]	9.06825e+08	1.10158e+09	1.49914e+08	5.62028e+08	0	3.6199e+08	1.21477	3.74901	>	16.8791	32.09	5	6	13.9771	32.09	5	5	6.33026	16.74	2	2	14.631	26.98	4	5					14.264	32.09	5	5	215	24.2483	5.22412
Q8Y823	Lmo1095 protein OS=Listeria monocytogenes GN=lmo1095 - [Q8Y823_LISMO]	3.03988e+08	5.67699e+08	1.62681e+08	367893277	5.00263e+07	2.13867e+08	1.86751	2.26143	4.27509	9.97683	32.09	3	3	6.32118	22.39	2	2	9.48708	22.39	2	3	8.41862	32.09	3	3	5.83087	22.39	2	2	7.6212	22.39	2	3	134	14.6225	7.92822
Q8Y745	HemN protein OS=Listeria monocytogenes GN=hemN - [Q8Y745_LISMO]	0	6.45149e+08	0	2.67949e+08	0	6.917e+07	>	>	>					21.0441	31.95	7	7					15.1052	18.18	4	5					12.176	18.18	4	4	385	43.809	5.80811
Q8Y714	tRNA-specific 2-thiouridylase mnmA OS=Listeria monocytogenes GN=mnmA - [MNMA_LISMO]	633148536	8.99425e+08	0	9.64746e+08	1.31008e+08	5.90535e+08	1.42056	>	4.50762	12.1778	13.75	3	4	17.3387	14.56	3	5					22.6244	18.33	4	6	14.1634	9.43	2	3	11.9381	10.51	2	3	371	41.4776	5.07178
Q8Y3W1	Lmo2720 protein OS=Listeria monocytogenes GN=lmo2720 - [Q8Y3W1_LISMO]	9.37869e+08	1.43488e+09	6.29314e+08	9.34146e+08	2.7309e+08	4.843e+08	1.52994	1.48439	1.77341	27.8977	19.81	7	9	15.821	15.24	6	6	22.4087	21.71	8	8	23.5786	17.9	7	8	18.4688	12.38	5	7	19.6174	13.52	6	7	525	59.1201	5.79541
Q8YAC8	Polyribonucleotide nucleotidyltransferase domain present OS=Listeria monocytogenes GN=lmo0218 - [Q8YAC8_LISMO]	0	2.65123e+08	0	0	0	0	>							5.06489	21.13	2	2																	142	15.6642	9.34912
Q48754	CD4+ T-cell-stimulating antigen OS=Listeria monocytogenes GN=tcsA - [TCSA_LISMO]	0	1.76641e+08	0	0	0	0	>							9.42055	11.48	3	3																	357	38.3913	5.23682
Q8Y824	Lmo1094 protein OS=Listeria monocytogenes GN=lmo1094 - [Q8Y824_LISMO]	1242813061	8.8538e+08	0	4.85188e+08	0	0	0.7124	>		5.96178	31.37	2	2	5.40317	31.37	2	2					6.60783	31.37	2	2									102	11.4029	5.08447
Q9S5A2	Ribosomal protein L11 methyltransferase OS=Listeria monocytogenes GN=prmA - [PRMA_LISMO]	5.4269e+08	9.87315e+08	2.52381e+08	9.75137e+08	1.15545e+08	3.60759e+08	1.8193	3.86375	3.12225	22.4786	26.11	7	7	18.3331	27.07	6	6	26.6188	25.8	6	9	19.3733	27.07	6	7	21.9512	31.21	7	7	29.9102	31.21	8	10	314	34.79	4.52588
P65770	Probable inorganic polyphosphate/ATP-NAD kinase 2 OS=Listeria monocytogenes GN=ppnK2 - [PPNK2_LISMO]	5.32814e+08	9.74271e+08	1.29715e+08	5.27411e+08	8.56518e+07	2.3976e+08	1.82854	4.06593	2.79924	15.5055	26.22	4	5	23.3274	26.22	4	7	15.458	20.6	3	5	10.2334	20.6	3	3	16.4078	20.6	3	5	16.4282	20.6	3	5	267	30.4796	7.03467
Q8YA56	Lmo0305 protein OS=Listeria monocytogenes GN=lmo0305 - [Q8YA56_LISMO]	3.38533e+08	3.26323e+08	1.57272e+08	5.61982e+08	5.76162e+07	5.77941e+07	0.963931	3.5733	1.00309	16.1154	20.67	3	4	12.9155	20.11	3	3	17.5846	20.11	3	4	23.3274	20.11	3	6	21.3711	22.63	4	6	12.8617	14.25	2	3	358	39.8733	4.97021
Q48757	Lmo0229 protein OS=Listeria monocytogenes GN=lmo0229 - [Q48757_LISMO]	0	3.5905e+08	0	2.66745e+08	0	0	>	>						6.3854	16.45	2	2					6.77501	16.45	2	2									152	17.4734	6.22705
Q8Y6J7	UPF0374 protein lmo1687 OS=Listeria monocytogenes GN=lmo1687 - [Y1687_LISMO]	0	3.8366e+08	0	0	0	0	>							9.9067	30.86	3	3																	175	21.1207	7.00537
Q8Y6T4	Tyrosyl-tRNA synthetase OS=Listeria monocytogenes GN=tyrS - [SYY_LISMO]	1.75306e+09	2.11249e+09	6.26756e+08	1.88794e+09	1.80886e+08	6.1815e+08	1.20503	3.01224	3.41735	23.491	24.11	8	8	26.3177	26.49	9	9	19.1062	20.76	7	7	25.41	24.11	8	9	30.9514	20.53	7	11	28.3558	24.11	8	9	419	47.5642	5.23682
Q8Y693	Lmo1803 protein OS=Listeria monocytogenes GN=lmo1803 - [Q8Y693_LISMO]	2.99077e+08	5.6939e+08	76511112	500274156	0	1.92952e+08	1.90382	6.53858	>	12.003	18.6	3	4	13.106	18.9	3	4	6.10807	9.45	2	2	13.0779	27.74	5	5					15.1335	15.55	3	5	328	36.3839	4.98291
P66548	30S ribosomal protein S3 OS=Listeria monocytogenes GN=rpsC - [RS3_LISMO]	0	2.54518e+09	0	1.53171e+09	0	8.29575e+08	>	>	>					8.91031	12.84	2	3					8.66849	12.84	2	3					8.30817	12.84	2	3	218	24.527	9.74463
Q8Y7J1	DNA topoisomerase IV subunit B OS=Listeria monocytogenes GN=parE - [Q8Y7J1_LISMO]	1.83287e+08	3.80905e+08	0	4.16499e+08	0	1.22966e+08	2.07819	>	>	9.31667	8.09	3	4	15.3385	16.18	5	5					15.0667	17.86	5	5					7.72825	5.65	2	3	655	72.9695	6.41748
Q8Y4F6	UvrABC system protein A OS=Listeria monocytogenes GN=uvrA - [UVRA_LISMO]	1.11824e+09	1.05077e+09	3.16057e+08	4.81183e+08	1.9428e+08	1.75655e+08	0.939661	1.52246	0.90413	40.0286	21.65	13	15	42.6709	19.67	11	13	27.7341	13.6	8	9	33.3897	10.25	7	10	21.7034	10.88	7	7	25.2919	10.25	7	8	956	106.415	6.60986
P66623	30S ribosomal protein S8 OS=Listeria monocytogenes GN=rpsH - [RS8_LISMO]	0	6.32657e+08	0	0	0	0	>							8.3881	25	2	3																	132	14.635	9.49561
Q8Y7I4	GlpD protein OS=Listeria monocytogenes GN=glpD - [Q8Y7I4_LISMO]	2.01943e+08	4.97275e+08	0	0	0	1.05197e+08	2.46246		>	7.9595	4.84	2	2	31.0883	21.86	8	9													11.5255	8.6	3	3	558	63.1993	6.78564
Q8Y3N3	Ribosomal RNA small subunit methyltransferase G OS=Listeria monocytogenes GN=rsmG - [RSMG_LISMO]	1.68535e+08	3.73025e+08	0	0	3.49878e+07	1.12211e+08	2.21334		3.20714	11.5937	22.69	4	4	5.2469	8.82	2	2									8.50918	13.87	3	3	4.60356	8.4	2	2	238	27.1408	6.44287
Q8Y7B9	Arginine repressor OS=Listeria monocytogenes GN=argR - [ARGR_LISMO]	0	0	0	271570814	0	148540028		>	>													6.4127	23.49	2	2					5.69399	16.11	2	2	149	16.7676	5.56689
Q8YAA4	50S ribosomal protein L1 OS=Listeria monocytogenes GN=rplA - [RL1_LISMO]	0	3.53559e+08	0	2.92535e+08	0	1.03891e+08	>	>	>					8.97982	16.16	3	3					8.27355	16.59	3	3					11.4207	17.03	4	4	229	24.517	9.31982
Q8Y838	Lmo1080 protein OS=Listeria monocytogenes GN=lmo1080 - [Q8Y838_LISMO]	666195677	1837552594	2.17043e+08	418990687	1.12027e+08	9.08898e+07	2.75828	1.93045	0.811322	21.3297	12.52	5	7	19.8605	19.58	7	7	13.4818	11.08	5	5	11.6981	8.83	4	4	10.8393	7.38	4	4	11.4503	8.51	4	4	623	71.4426	5.73193
Q8Y754	Glycyl-tRNA synthetase beta subunit OS=Listeria monocytogenes GN=glyS - [SYGB_LISMO]	9.17521e+08	9.67984e+08	4.00805e+08	8.6916e+08	1.6916e+08	2.66738e+08	1.055	2.16854	1.57684	43.6943	22.97	10	14	33.7508	18.75	8	10	30.173	17.73	8	10	29.7505	14.68	6	9	17.7634	13.08	6	6	30.5777	14.53	7	9	688	78.4586	4.94482
Q8YAC4	33 kDa chaperonin OS=Listeria monocytogenes GN=hslO - [HSLO_LISMO]	0	5.5897e+08	0	4.60564e+08	0	1.78268e+08	>	>	>					20.027	25.51	6	6					9.77547	14.29	2	3					9.26392	8.16	2	3	294	31.8948	4.66553
Q8Y4U6	FruA protein OS=Listeria monocytogenes GN=fruA - [Q8Y4U6_LISMO]	7.6264e+08	4.67762e+08	2.3989e+08	2.1197e+08	167730237	1.5016e+08	0.613345	0.883612	0.895245	17.6944	9.97	5	6	26.7362	10.6	7	9	22.1653	11.71	5	8	11.7167	8.07	3	4	16.0467	10.6	5	6	10.1869	7.28	3	4	632	66.1731	5.99854
Q8Y8D4	D-alanine--poly(phosphoribitol) ligase subunit 1 OS=Listeria monocytogenes GN=dltA - [DLTA_LISMO]	3.10166e+08	4.14041e+08	4.21276e+07	2.58187e+08	0	9.47072e+07	1.3349	6.12871	>	16.8296	17.84	5	5	24.0242	17.84	6	7	4.79038	4.71	2	2	12.5847	13.92	4	4					7.59298	7.06	3	3	510	57.7254	5.17334
Q8Y4F5	UvrABC system protein B OS=Listeria monocytogenes GN=uvrB - [UVRB_LISMO]	1.22321e+09	1.17623e+09	4.39952e+08	1.38833e+09	1.9634e+08	4.63394e+08	0.961599	3.15564	2.36016	39.5109	21.88	8	11	41.1009	19.6	9	12	27.3253	19.6	7	8	56.1631	26.14	11	17	21.881	13.37	7	7	44.1678	19.6	7	13	658	75.5149	5.45264
Q8Y4C0	ATP synthase subunit alpha 2 OS=Listeria monocytogenes GN=atpA2 - [ATPA2_LISMO]	4.92705e+08	5.75874e+08	1.10049e+08	3.26866e+08	9.8675e+07	1.54858e+08	1.1688	2.97018	1.56938	19.7533	19.44	5	6	26.2843	21.03	6	9	17.5694	16.87	4	5	26.6877	16.87	4	8	22.7011	18.85	5	7	11.7341	9.52	4	4	504	55.0528	5.49072
Q8Y826	Nicotinate phosphoribosyltransferase OS=Listeria monocytogenes GN=lmo1092 - [Q8Y826_LISMO]	5.30835e+08	2.70598e+08	2.03522e+08	4.30188e+08	6.36891e+07	9.9216e+07	0.509759	2.11372	1.55782	15.5933	15.32	4	4	10.8511	12.5	3	3	14.5769	15.32	4	4	12.9947	15.32	4	4	10.2587	9.07	3	3	10.1683	8.67	3	3	496	56.2306	5.35107
Q8Y7Q1	Phenylalanyl-tRNA synthetase beta chain OS=Listeria monocytogenes GN=pheT - [SYFB_LISMO]	7.06204e+08	7.6716e+08	2.10102e+08	3.53378e+08	4.30828e+08	1.54075e+08	1.08632	1.68193	0.357624	32.1352	17.33	8	9	16.114	9.98	5	5	28.3029	11.1	5	7	21.7233	13.59	6	6	32.0597	15.71	7	10	17.5396	9.98	5	5	802	87.956	5.16064
Q8Y798	Lmo1392 protein OS=Listeria monocytogenes GN=lmo1392 - [Q8Y798_LISMO]	7.72791e+08	7.38326e+08	1.18697e+08	433775833	7.31371e+07	1.24244e+08	0.955402	3.65447	1.69878	29.8727	23.72	8	10	19.2898	17.44	6	7	11.4275	8.84	3	4	15.2157	8.84	3	5	15.3935	12.33	4	5	13.082	11.63	4	4	430	49.0002	5.03369
Q8Y3T4	Seryl-tRNA synthetase OS=Listeria monocytogenes GN=serS - [SYS_LISMO]	1.45012e+09	1.00484e+09	326580849	8.83146e+08	6.47342e+07	3.64037e+08	0.692932	2.70422	5.62356	20.0834	18.97	6	7	16.1791	19.44	6	6	22.5037	18.97	6	8	15.1861	15.69	5	6	14.5195	16.39	5	5	20.7609	21.78	7	7	427	49.047	5.36377
Q8Y6M1	AnsB protein OS=Listeria monocytogenes GN=ansB - [Q8Y6M1_LISMO]	2.21457e+09	1.68586e+09	6.15862e+08	8.11945e+08	1.38538e+08	3.96725e+08	0.76126	1.31839	2.86366	32.5956	19	8	9	25.8493	19.32	8	8	46.8181	19	8	13	35.3961	14.81	6	9	33.8311	11.43	5	9	31.6403	19.32	8	9	621	71.8529	5.71924
Q8Y756	Probable endonuclease 4 OS=Listeria monocytogenes GN=nfo - [END4_LISMO]	3.67891e+08	3.92616e+08	7.14712e+07	1.3217e+08	3.84228e+07	8.69147e+07	1.06721	1.84928	2.26206	14.9527	17.85	4	6	15.8905	17.85	4	6	8.50386	13.13	3	3	11.7529	8.75	2	4	5.30699	9.43	2	2	10.9252	16.84	4	4	297	32.6786	6.18896
Q8Y8G8	Lmo0936 protein OS=Listeria monocytogenes GN=lmo0936 - [Q8Y8G8_LISMO]	4.92334e+08	5.49204e+08	7.13415e+07	4.92849e+08	4.63498e+07	8.78724e+07	1.11551	6.90831	1.89585	17.016	22.36	5	5	9.81518	14.23	3	3	8.81291	9.35	2	3	17.1256	22.36	6	6	9.30538	16.26	3	3	13.6383	20.33	4	4	246	27.3762	6.02393
Q8Y3M5	tRNA uridine 5-carboxymethylaminomethyl modification enzyme MnmG OS=Listeria monocytogenes GN=mnmG - [MNMG_LISMO]	2.9271e+08	1.50608e+09	1.44199e+08	4.93783e+08	6.03817e+07	5.17977e+08	5.14528	3.42432	8.57838	19.9889	15.1	5	5	38.8238	29.25	9	11	10.2085	9.7	3	3	25.4676	13.67	4	6	5.60881	6.52	2	2	27.4544	20.19	7	8	629	70.0932	5.50342
Q8YA81	Lmo0278 protein OS=Listeria monocytogenes GN=lmo0278 - [Q8YA81_LISMO]	172139048	3.93829e+08	0	2.97098e+08	0	1.64643e+08	2.28786	>	>	6.94096	7.65	2	2	7.67051	7.65	2	2					12.4153	17.21	4	4					9.69889	7.65	2	3	366	41.122	6.21436
Q8Y6B7	Phosphoribosylaminoimidazole carboxylase II OS=Listeria monocytogenes GN=purK - [Q8Y6B7_LISMO]	1.10008e+09	5.72255e+08	3.02827e+08	5.56239e+08	1.81871e+08	2.58015e+08	0.520194	1.83682	1.41867	14.8015	20.05	4	5	11.874	13.37	3	4	13.7398	11.23	3	4	12.3466	15.78	4	4	10.014	6.68	2	3	11.615	10.96	3	4	374	41.3814	5.12256
Q8Y8T1	Lmo0813 protein OS=Listeria monocytogenes GN=lmo0813 - [Q8Y8T1_LISMO]	2.48252e+08	0	5.47401e+07	1.18197e+08	4.26823e+07	7.73914e+07		2.15925	1.8132	10.4846	10.34	3	3					5.53114	7.24	2	2	8.93333	14.48	3	3	7.79283	11.03	3	3	5.63529	7.24	2	2	290	31.3511	5.90967
Q93Q55	Gamma-glutamyl phosphate reductase OS=Listeria monocytogenes GN=proA - [PROA_LISMO]	5.94403e+08	8.58978e+08	1.00778e+08	5.01597e+08	6.61129e+07	2.10451e+08	1.44511	4.97723	3.1832	20.5618	20.96	5	5	27.7426	24.82	6	7	22.112	24.82	6	6	36.9737	25.06	6	10	18.0306	20.48	5	5	35.8219	24.82	6	9	415	45.4806	5.47803
Q8YAA6	Transcription antitermination protein nusG OS=Listeria monocytogenes GN=nusG - [Q8YAA6_LISMO]	0	366289959	0	0	0	1.53664e+08	>		>					11.5121	20.34	2	3													6.77877	20.9	2	2	177	19.928	5.22412
Q8Y4B3	Uracil phosphoribosyltransferase OS=Listeria monocytogenes GN=upp - [UPP_LISMO]	827611632	1.37293e+09	4.96371e+08	5.92503e+08	2.98845e+08	3.39191e+08	1.6589	1.19367	1.13501	17.4033	28.71	3	5	13.9418	19.62	3	5	5.42169	19.62	2	2	10.035	19.62	2	3	11.3598	19.62	2	4	7.67703	19.62	3	3	209	22.9301	6.06201
Q8Y5B3	Lmo2154 protein OS=Listeria monocytogenes GN=lmo2154 - [Q8Y5B3_LISMO]	0	9.66715e+08	0	6.24015e+08	0	1.56552e+08	>	>	>					14.4164	20.34	5	5					17.8754	17.48	4	6					16.749	16.62	4	5	349	40.1919	4.80518
Q8Y888	Lmo1029 protein OS=Listeria monocytogenes GN=lmo1029 - [Q8Y888_LISMO]	5.2639e+08	582828295	1.14883e+08	2.47593e+08	0	1.33782e+08	1.10722	2.15518	>	11.1023	16.02	2	3	7.2969	16.02	2	2	4.86714	16.02	2	2	8.45772	16.02	2	2					9.46384	20.7	2	3	256	28.7323	5.42725
Q8Y960	Motility gene repressor mogR OS=Listeria monocytogenes GN=mogR - [MOGR_LISMO]	2.13875e+08	6.66781e+08	0	5.55901e+08	0	2.92425e+08	3.11762	>	>	5.15448	6.54	2	2	19.131	28.43	6	6					23.7408	28.43	6	8					15.3257	16.99	4	5	306	35.2322	5.64307
Q8Y5S7	Glucose-6-phosphate 1-dehydrogenase OS=Listeria monocytogenes GN=lmo1978 - [Q8Y5S7_LISMO]	9.27915e+08	1.01954e+09	2.3655e+08	9.7226e+08	1.14871e+08	2.99947e+08	1.09874	4.11018	2.61117	31.9254	25.87	8	9	24.552	20.77	6	7	26.9971	23.01	7	9	23.2692	20.77	6	8	28.2819	19.14	6	9	23.7112	20.77	6	7	491	56.1642	5.43994
Q8Y8A3	Lmo1009 protein OS=Listeria monocytogenes GN=lmo1009 - [Q8Y8A3_LISMO]	2.16489e+08	3.76261e+08	0	0	0	1.14739e+08	1.73801		>	8.67065	28	2	2	9.94794	28	2	2													8.4804	28	2	2	150	17.2409	5.33838
Q8Y6V6	Lmo1575 protein OS=Listeria monocytogenes GN=lmo1575 - [Q8Y6V6_LISMO]	0	218896755	5.80224e+07	1.74308e+08	4.8555e+07	7.86838e+07	>	3.00416	1.62051					8.48612	12.54	2	2	16.2493	12.54	2	4	10.7106	15.76	3	3	8.18609	12.54	2	2	14.8952	12.54	2	4	311	34.7776	4.95752
Q8Y993	Lmo0640 protein OS=Listeria monocytogenes GN=lmo0640 - [Q8Y993_LISMO]	2.59568e+08	2.82567e+08	7.09614e+07	248857956	0	0	1.0886	3.50695		16.8003	16.07	3	5	8.03073	16.07	2	3	6.17196	18.03	2	2	22.1307	27.87	4	6									305	34.0231	5.17334
Q8Y9F4	Lmo0574 protein OS=Listeria monocytogenes GN=lmo0574 - [Q8Y9F4_LISMO]	1.58076e+09	6.47861e+08	1.68584e+08	3.44897e+08	0	0	0.409842	2.04585		28.3891	25.43	7	9	12.8155	10.78	2	4	19.5511	9.7	3	6	8.77812	10.34	3	3									464	54.0672	5.24951
Q8Y7B7	Lmo1369 protein OS=Listeria monocytogenes GN=lmo1369 - [Q8Y7B7_LISMO]	0	1.28138e+08	0	0	0	0	>							10.7236	15.63	2	3																	288	30.7555	6.81494
Q8Y668	Orotate phosphoribosyltransferase OS=Listeria monocytogenes GN=pyrE - [PYRE_LISMO]	2.42222e+08	4.67356e+08	1.02471e+08	3.62422e+08	7.55851e+07	1.96564e+08	1.92945	3.53684	2.60057	9.57012	27.75	3	3	9.59058	27.75	3	3	7.76266	27.75	3	3	7.83656	20.1	2	2	7.02333	15.79	2	2	14.4297	27.75	3	4	209	22.8201	5.49072
Q8Y4L5	Lmo2422 protein OS=Listeria monocytogenes GN=cesR - [Q8Y4L5_LISMO]	0	0	0	8.55449e+07	0	5.31067e+07		>	>													6.66475	11.26	2	2					8.56113	11.26	2	3	231	26.0266	5.13525
Q8Y5R3	Pdp protein OS=Listeria monocytogenes GN=pdp - [Q8Y5R3_LISMO]	0	3.58912e+08	0	1.6936e+08	0	6.21726e+07	>	>	>					9.38212	12.93	3	3					11.4314	18.71	3	3					11.0096	8.55	2	3	433	46.0579	4.89404
Q8Y6S6	PheT protein OS=Listeria monocytogenes GN=pheT - [Q8Y6S6_LISMO]	918467642	1.58809e+09	2.28748e+08	1258499914	1.39321e+08	5.56459e+08	1.72907	5.50168	3.99407	11.4426	21.95	4	4	7.96279	17.07	3	3	6.11782	12.68	2	2	6.35972	12.68	2	2	6.40155	12.68	2	2	7.67852	17.07	3	3	205	22.4095	4.88135
P0A4Q6	2',3'-cyclic-nucleotide 2'-phosphodiesterase OS=Listeria monocytogenes GN=lmo1399 - [CNPD_LISMO]	0	4.25839e+08	0	2.56162e+08	0	9.28362e+07	>	>	>					7.97655	9.81	3	3					6.97812	5.96	2	2					8.06163	9.62	3	3	520	58.283	5.45264
Q8Y5V2	Pnp protein OS=Listeria monocytogenes GN=pnp - [Q8Y5V2_LISMO]	412650134	541780193	2.22141e+08	3.17091e+08	6.94413e+07	1.83e+08	1.31293	1.42744	2.63531	12.5766	18.38	2	3	12.3377	18.38	2	3	17.3439	18.38	2	4	14.6254	18.38	2	3	12.9872	18.38	2	3	11.9565	18.38	2	3	272	29.457	4.94482
Q8Y6S4	Lmo1609 protein OS=Listeria monocytogenes GN=lmo1609 - [Q8Y6S4_LISMO]	2005523711	5.33322e+09	8.36729e+08	4.44934e+09	5.21786e+08	1.29921e+09	2.65927	5.31754	2.48994	6.57073	23.3	2	2	9.07647	27.18	3	3	7.02335	27.18	2	2	14.9122	27.18	3	5	6.9408	27.18	2	2	15.3573	27.18	3	5	103	11.7966	4.33545
Q929B9	Lmo2256 protein OS=Listeria monocytogenes GN=lmo2256 - [Q929B9_LISMO]	2.94181e+07	0	0	1.34779e+08	0	0		>		7.09989	20.23	2	2									5.75908	17.34	2	2									173	19.0608	5.40186
Q8Y692	Smc protein OS=Listeria monocytogenes GN=smc - [Q8Y692_LISMO]	9.85144e+07	2.77989e+08	1.93909e+08	3.49074e+08	2.20925e+07	88004175	2.82182	1.8002	3.98345	11.7669	4.72	3	3	25.0461	12.73	8	8	18.7521	8.43	5	6	21.9621	10.88	7	7	10.3958	4.72	3	3	29.3568	8.01	6	8	1186	133.975	5.04639
Q8Y634	Putative phosphotransferase lmo1866 OS=Listeria monocytogenes GN=lmo1866 - [Y1866_LISMO]	5.62571e+07	0	0	0	0	9.83241e+06			>	5.25782	18.52	2	2																	5.66344	18.52	2	2	270	30.0018	5.41455
Q8Y7H7	LexA repressor OS=Listeria monocytogenes GN=lexA - [LEXA_LISMO]	0	0	0	1.83932e+08	0	0		>														5.47005	16.67	2	2									204	22.6237	4.97021
Q8Y8K3	Lmo0898 protein OS=Listeria monocytogenes GN=lmo0898 - [Q8Y8K3_LISMO]	2.22687e+08	3.92559e+08	8.07495e+07	2.57634e+08	2.1572e+07	1.39872e+08	1.76283	3.19054	6.48395	16.8161	11.59	5	5	18.1698	13.24	6	6	9.30891	6.34	3	3	13.0806	8.14	4	4	8.20049	6.62	3	3	17.4432	10.07	5	6	725	81.5166	5.5415
Q8Y9F3	Lmo0575 protein OS=Listeria monocytogenes GN=lmo0575 - [Q8Y9F3_LISMO]	0	1.01435e+09	0	6.17437e+08	0	0	>	>						9.50066	18.18	3	3					15.6154	21.07	3	4									242	28.0697	7.12256
Q8Y797	Lmo1393 protein OS=Listeria monocytogenes GN=lmo1393 - [Q8Y797_LISMO]	4.69394e+08	6.73668e+08	1.9868e+08	6.8977e+08	8.64782e+07	1.3305e+08	1.43519	3.47176	1.53854	19.2243	19.63	7	7	23.5488	24.53	8	8	17.8021	18.93	6	6	14.6109	12.62	4	5	20.9735	17.52	6	7	17.719	14.72	5	6	428	48.6836	4.98291
Q8Y5M5	Cell division protein ftsZ OS=Listeria monocytogenes GN=ftsZ - [Q8Y5M5_LISMO]	0	6.27652e+08	0	2.43019e+08	0	1.21477e+08	>	>	>					21.3133	26.6	5	7					8.67996	11.51	3	3					16.8795	11.51	4	6	391	41.3251	4.85596
Q8Y4L1	Lmo2426 protein OS=Listeria monocytogenes GN=lmo2426 - [Q8Y4L1_LISMO]	1.05874e+09	1.2447e+09	298243161	685438866	1.90998e+08	3.29934e+08	1.17565	2.29826	1.72742	6.41378	19.66	2	2	7.91918	26.5	3	3	5.20388	19.66	2	2	8.0978	26.5	3	3	5.87645	19.66	2	2	7.98269	26.5	3	3	117	13.6419	5.59229
Q8Y5L1	Lmo2048 protein OS=Listeria monocytogenes GN=lmo2048 - [Q8Y5L1_LISMO]	9.09529e+07	0	0	0	0	0				5.70751	15.73	2	2																					178	20.6753	4.61475
Q8Y6Y7	MinD protein OS=Listeria monocytogenes GN=minD - [Q8Y6Y7_LISMO]	2.99005e+08	1.09772e+09	7.27923e+07	1.00158e+09	5.28756e+07	3.79575e+08	3.67123	13.7594	7.17864	8.43959	15.41	3	3	18.3382	21.43	5	6	13.8389	15.41	3	5	15.7425	18.42	4	5	11.5054	15.41	3	4	21.0862	21.43	5	7	266	29.0483	5.21143
Q8Y7Q2	Phenylalanyl-tRNA synthetase alpha chain OS=Listeria monocytogenes GN=pheS - [SYFA_LISMO]	6.34961e+08	5.91531e+08	289315680	5.75786e+08	9.06667e+07	2.42566e+08	0.931602	1.99017	2.67536	18.1796	23.71	5	6	11.5355	18.57	4	4	13.6977	23.14	5	5	15.6088	21.14	5	5	14.6686	18	4	5	11.0366	18	4	4	350	39.2476	5.26221
Q8Y7B2	Lmo1374 protein OS=Listeria monocytogenes GN=lmo1374 - [Q8Y7B2_LISMO]	0	1.69384e+09	1.82738e+08	1.27502e+09	0	644315034	>	6.97729	>					30.5607	20.91	6	11	9.74672	11.3	2	3	23.0495	19.23	6	8					23.6514	24.04	7	8	416	45.0826	5.33838
Q8Y7L7	Lmo1258 protein OS=Listeria monocytogenes GN=lmo1258 - [Q8Y7L7_LISMO]	4.89251e+08	8.73647e+08	1.86316e+08	5.34593e+08	1.23248e+08	3.64396e+08	1.78568	2.86928	2.95661	13.503	10.46	3	4	10.4217	10.46	3	3	11.9667	10.46	3	4	13.3286	10.46	3	4	12.5343	10.46	3	4	9.92058	10.46	3	3	306	34.4835	6.15088
Q8Y564	Uroporphyrinogen decarboxylase OS=Listeria monocytogenes GN=hemE - [DCUP_LISMO]	6.86548e+08	8.46548e+08	3.0236e+08	8.1289e+08	6.64296e+07	2.99508e+08	1.23305	2.68849	4.50865	19.1459	18.41	4	6	23.1884	20.68	5	8	7.08977	11.9	3	3	18.1281	21.53	5	6	9.64802	11.9	3	3	21.3071	21.53	5	7	353	39.9029	6.07471
P66103	50S ribosomal protein L20 OS=Listeria monocytogenes GN=rplT - [RL20_LISMO]	2.79268e+09	2.37437e+09	1.48365e+09	2.97204e+09	4.57744e+08	2.54702e+08	0.850214	2.00319	0.556429	73.0515	26.05	3	16	12.6596	18.49	2	3	29.7427	18.49	2	7	22.7628	18.49	2	6	15.339	26.05	3	4	26.1367	18.49	2	6	119	13.6786	10.9897
Q8Y992	Lmo0641 protein OS=Listeria monocytogenes GN=lmo0641 - [Q8Y992_LISMO]	2.82749e+08	3.02626e+08	6.54049e+07	0	0	1.25944e+08	1.0703		>	7.98682	10.86	3	3	12.0515	18.37	5	5	8.18001	3.99	2	3									5.46962	4.15	2	2	626	67.6627	5.71924
Q8Y6Q2	TrpG protein OS=Listeria monocytogenes GN=trpG - [Q8Y6Q2_LISMO]	0	1.72337e+08	0	1.79343e+08	0	2.57441e+07	>	>	>					6.87842	25.87	2	2					11.1073	25.87	2	3					8.04666	25.87	2	2	201	21.9443	5.2749
Q8Y7G0	Ribosome maturation factor rimP OS=Listeria monocytogenes GN=rimP - [RIMP_LISMO]	0	338423268	0	0	0	0	>							9.39802	25.81	2	3																	155	17.5039	4.70361
Q92AU7	Lmo1710 protein OS=Listeria monocytogenes GN=lmo1710 - [Q92AU7_LISMO]	0	0	0	1.48695e+09	5.39711e+07	7.91225e+08		>	14.6602													10.1806	25.68	2	3	5.4331	25	2	2	4.85082	25.68	2	2	148	16.3947	3.9165
Q8Y9C1	FMN-dependent NADH-azoreductase 1 OS=Listeria monocytogenes GN=azoR1 - [AZOR1_LISMO]	0	1.64453e+09	0	0	0	4.28859e+08	>		>					15.2102	25.48	3	4													15.4511	25.48	3	4	208	23.0107	5.03369
Q8Y3K5	Lmo2830 protein OS=Listeria monocytogenes GN=lmo2830 - [Q8Y3K5_LISMO]	0	0	0	0	0	1.01103e+09			>																					7.95767	25.47	2	3	106	11.9442	5.23682
Q8Y3K4	Lmo2831 protein OS=Listeria monocytogenes GN=lmo2831 - [Q8Y3K4_LISMO]	0	1.63638e+08	0	68854152	0	0	>	>						6.63358	13.64	2	2					5.45493	17.73	2	2									220	23.9385	4.79248
Q8Y9A7	Lmo0625 protein OS=Listeria monocytogenes GN=lmo0625 - [Q8Y9A7_LISMO]	3.56729e+08	9.62687e+08	0	5.64134e+08	0	5.507e+08	2.69865	>	>	5.38693	13.3	2	2	8.19273	20.6	3	3					15.5891	25.32	5	6					6.29632	13.3	2	2	233	26.6126	7.56201
Q8YAR2	50S ribosomal protein L9 OS=Listeria monocytogenes GN=rplI - [RL9_LISMO]	0	7.56458e+08	0	0	0	1.69793e+08	>		>					6.33755	16.22	2	2													5.50998	16.22	2	2	148	16.1537	9.37842
Q8Y733	Shikimate dehydrogenase 2 OS=Listeria monocytogenes GN=aroE2 - [Q8Y733_LISMO]	4.6859e+07	0	0	0	0	0				8.28482	19.41	2	2																					273	29.9534	5.10986
Q8YAV1	Lmo0012 protein OS=Listeria monocytogenes GN=lmo0012 - [Q8YAV1_LISMO]	100407540	1.53795e+08	3.03802e+07	0	0	4.45857e+07	1.5317		>	7.92717	9.47	2	2	16.2961	19.5	5	5	5.6311	7.8	2	2									5.6305	6.69	2	2	359	39.9554	6.23975
Q8Y9L8	Ribose-phosphate pyrophosphokinase 2 OS=Listeria monocytogenes GN=prs2 - [KPRS2_LISMO]	0	3.01226e+08	0	2.112e+08	0	7.26856e+07	>	>	>					14.8362	21.22	4	5					14.7303	21.22	4	5					6.57053	8.68	2	2	311	34.3231	6.45557
Q48761	DNA repair protein RadA homolog OS=Listeria monocytogenes GN=radA - [RADA_LISMO]	1.52298e+08	4.65088e+08	9.67018e+07	383975347	0	1.62813e+08	3.0538	3.97071	>	10.2065	8.32	3	3	13.6102	11.82	4	4	4.94745	6.35	2	2	8.25846	8.75	3	3					13.7068	11.82	4	4	457	49.9499	7.97217
Q9X768	Lmo1408 protein OS=Listeria monocytogenes GN=orfA - [Q9X768_LISMO]	0	1.50066e+08	0	0	0	0	>							4.58238	12.5	2	2																	176	20.7029	8.79248
O08352	RNA polymerase sigma-54 factor (Sigma-L) OS=Listeria monocytogenes GN=rpoN - [O08352_LISMO]	0	2.55015e+08	0	2.03735e+08	0	0	>	>						15.1802	12.98	3	5					15.4965	14.77	4	5									447	50.823	4.98291
Q8YAK8	Lmo0110 protein OS=Listeria monocytogenes GN=lmo0110 - [Q8YAK8_LISMO]	1.89307e+08	2.1614e+08	8.99817e+07	2.88892e+08	2.84366e+07	4.81158e+07	1.14174	3.21056	1.69204	10.6627	18.06	3	3	11.5247	18.06	3	3	10.2301	12.4	2	3	6.43736	12.4	2	2	9.6407	18.06	3	3	19.3168	18.06	3	6	371	40.4372	4.61475
Q8Y5A3	Lmo2166 protein OS=Listeria monocytogenes GN=lmo2166 - [Q8Y5A3_LISMO]	4.48349e+08	2.01475e+08	4.95506e+07	1.40952e+08	0	4.33742e+07	0.449372	2.84461	>	13.0361	23.32	3	5	7.38473	16.59	2	3	8.58957	17.04	2	3	8.33163	16.59	2	3					9.76127	16.59	2	4	223	26.0617	7.76709
Q8Y9V5	Lmo0415 protein OS=Listeria monocytogenes GN=lmo0415 - [Q8Y9V5_LISMO]	0	3.16299e+08	0	0	0	2.57684e+07	>		>					18.3402	16.95	4	4													10.497	8.15	2	3	466	52.4631	9.46631
Q8YA14	Lmo0352 protein OS=Listeria monocytogenes GN=lmo0352 - [Q8YA14_LISMO]	0	3.38947e+08	0	0	0	7.64703e+07	>		>					7.738	11.02	2	2													10.786	11.02	2	3	254	28	6.41748
Q8Y8T0	Lmo0814 protein OS=Listeria monocytogenes GN=lmo0814 - [Q8Y8T0_LISMO]	1.02009e+08	271174741	0	267318434	0	0	2.65835	>		6.70876	9.39	2	3	5.1322	9.39	2	2					5.08664	9.39	2	2									309	32.4132	5.43994
Q8Y440	50S ribosomal protein L3 OS=Listeria monocytogenes GN=rplC - [RL3_LISMO]	3.00524e+08	2.7332e+08	0	1101206792	0	0	0.909475	>		12.5728	14.35	2	3	19.7945	23.92	3	5					18.2608	14.35	2	5									209	22.8113	9.81787
Q8Y755	Lmo1450 protein OS=Listeria monocytogenes GN=lmo1450 - [Q8Y755_LISMO]	0	2.36247e+08	0	0	0	0	>							20.5501	16.55	4	6																	435	49.6206	9.77393
Q92F34	Lmo0241 protein OS=Listeria monocytogenes GN=lmo0241 - [Q92F34_LISMO]	0	1034011609	0	3.88345e+08	1.69503e+08	2.35694e+08	>	>	1.3905					7.6696	13.15	3	3					8.11139	19.52	3	3	4.48779	7.57	2	2	10.3019	13.15	3	4	251	28.0607	7.54736
Q8Y8P0	UDP-N-acetylmuramoyl-tripeptide--D-alanyl-D-alanine ligase OS=Listeria monocytogenes GN=murF - [Q8Y8P0_LISMO]	7.43339e+08	5.25274e+08	2.25497e+08	352691299	1.19973e+08	7.50405e+07	0.706641	1.56407	0.625478	14.3628	14.44	5	5	20.9309	15.54	5	6	18.3837	14.44	5	6	14.0325	12.69	4	4	16.5542	13.57	4	4	8.88604	8.75	3	3	457	50.4301	5.38916
Q8Y6Z2	Glycerol kinase OS=Listeria monocytogenes GN=glpK - [GLPK_LISMO]	8.19272e+08	9.95021e+08	0	9.66976e+08	1.46215e+08	5.25519e+08	1.21452	>	3.59416	19.8244	15.69	4	6	14.3359	12.47	3	4					13.7626	12.47	3	4	12.4039	12.47	3	4	9.80376	12.47	3	3	497	55.4281	5.05908
Q92BM7	Lmo1486 protein OS=Listeria monocytogenes GN=lmo1486 - [Q92BM7_LISMO]	3.56267e+08	4.78336e+08	0	2.45742e+08	7.22052e+07	1.62287e+08	1.34263	>	2.24759	8.50777	23.73	3	3	7.74834	23.73	3	3					8.43279	19.49	2	3	6.17652	19.49	2	2	6.27657	19.49	2	2	118	13.3137	4.90674
Q8YA24	Lmo0341 protein OS=Listeria monocytogenes GN=lmo0341 - [Q8YA24_LISMO]	0	3.11697e+08	0	316587401	2.92614e+07	1.07066e+08	>	>	3.65897					4.65113	23.64	2	2					4.88802	23.64	2	2	4.6457	23.64	2	2	4.99906	23.64	2	2	110	12.5265	5.90967
Q8Y423	Lmo2652 protein OS=Listeria monocytogenes GN=lmo2652 - [Q8Y423_LISMO]	0	2.73387e+08	0	2.76619e+08	0	0	>	>						11.2564	10.32	4	4					10.6644	9.01	4	4									688	78.8796	5.47803
Q8Y8V2	Lmo0790 protein OS=Listeria monocytogenes GN=lmo0790 - [Q8Y8V2_LISMO]	0	1.94806e+08	0	1.89397e+08	0	0	>	>						12.1575	23.42	3	3					8.43879	14.56	2	2									158	17.3811	7.79639
Q8Y401	Lmo2677 protein OS=Listeria monocytogenes GN=lmo2677 - [Q8Y401_LISMO]	2.25307e+08	3.15862e+08	0	0	0	0	1.40192			10.1599	17.41	3	3	8.75867	18.15	3	3																	270	30.5814	4.98291
Q8Y8U3	Lmo0800 protein OS=Listeria monocytogenes GN=lmo0800 - [Q8Y8U3_LISMO]	0	8.97575e+08	0	4.1371e+08	0	1.06405e+08	>	>	>					6.54069	23.28	2	2					5.66052	23.28	2	2					5.85324	23.28	2	2	116	13.3586	4.61475
Q8Y7B8	DNA repair and genetic recombination OS=Listeria monocytogenes GN=recN - [Q8Y7B8_LISMO]	1.22309e+08	2.07239e+08	8.99668e+07	3.21443e+08	2.31152e+07	0	1.69439	3.57291		23.5858	10.3	2	6	16.3931	10.3	2	4	15.8775	10.3	2	4	17.44	12.61	3	5	12.0356	10.3	2	3					563	63.4835	5.38916
Q8Y757	Probable manganese-dependent inorganic pyrophosphatase OS=Listeria monocytogenes GN=ppaC - [PPAC_LISMO]	7.20824e+08	8.40139e+08	1.90181e+08	4.73359e+08	7.8932e+07	1.79517e+08	1.16553	2.48899	2.27432	16.6051	12.99	3	5	23.1044	23.05	6	7	18.1832	20.13	5	6	20.8045	19.16	5	6	12.0185	16.23	4	4	23.3345	16.23	4	6	308	33.7404	4.76709
Q8Y8S5	Lmo0819 protein OS=Listeria monocytogenes GN=lmo0819 - [Q8Y8S5_LISMO]	0	2.69699e+08	0	1.77642e+08	0	8.21526e+07	>	>	>					7.88394	19.15	3	3					8.11989	19.5	3	3					5.43766	7.45	2	2	282	32.416	5.45264
Q9S5A3	Chaperone protein dnaJ OS=Listeria monocytogenes GN=dnaJ - [DNAJ_LISMO]	3.04148e+08	6.40648e+08	0	6.36422e+08	3.56487e+07	2.81918e+08	2.10637	>	7.90821	11.3611	11.14	2	3	19.8556	19.1	5	6					9.11388	9.55	2	2	11.4487	10.61	2	3	13.1598	13.79	4	4	377	41.0515	7.88428
Q8Y4S2	Transmembrane protein OS=Listeria monocytogenes GN=lmo2360 - [Q8Y4S2_LISMO]	0	450400483	0	3.22663e+08	0	1.29677e+08	>	>	>					29.8026	14.56	9	10					13.29	7.44	4	4					12.473	7.01	4	4	927	97.1341	6.50732
Q8Y8C0	Peptide chain release factor 3 OS=Listeria monocytogenes GN=prfC - [RF3_LISMO]	575766230	718675102	3.36489e+08	6.14751e+08	1.18058e+08	7.6588e+07	1.24821	1.82696	0.648732	21.2987	22.61	7	7	13.9647	13.41	5	5	9.85816	6.9	2	3	11.1494	9.39	4	4	15.6618	11.3	4	5	7.79434	4.98	2	2	522	59.362	5.42725
Q8Y851	Lmo1067 protein OS=Listeria monocytogenes GN=lmo1067 - [Q8Y851_LISMO]	4.18336e+08	3.75392e+08	9.28003e+07	4.53495e+08	5.46885e+07	1.57656e+08	0.897345	4.88679	2.88279	26.0834	16.67	8	8	13.4725	9.64	5	5	13.115	8.01	4	5	18.9746	15.36	6	7	7.07805	5.72	3	3	8.41928	5.72	3	3	612	68.6851	5.13525
Q8Y3T8	Probable transaldolase 1 OS=Listeria monocytogenes GN=tal1 - [TAL1_LISMO]	498837504	582504349	0	2.68079e+08	0	1.54147e+08	1.16772	>	>	4.82908	8.88	2	2	4.48419	10.28	2	2					5.37783	14.49	2	2					4.91561	10.28	2	2	214	23.0811	5.09717
Q8YA73	Lmo0286 protein OS=Listeria monocytogenes GN=lmo0286 - [Q8YA73_LISMO]	0	0	0	1.88496e+08	0	5.86477e+07		>	>													6.06278	11.2	2	2					10.9757	9.41	2	3	393	43.4867	4.729
Q8Y6T8	Septation ring formation regulator EzrA OS=Listeria monocytogenes GN=ezrA - [EZRA_LISMO]	0	2.34413e+08	0	5.84791e+07	0	0	>	>						23.3816	11.56	3	6					14.7589	7.71	2	4									571	66.4781	4.98291
Q8Y6U0	Probable tRNA sulfurtransferase OS=Listeria monocytogenes GN=thiI - [THII_LISMO]	0	268380133	0	0	0	0	>							11.4193	14.64	3	4																	403	44.9454	6.46826
Q8Y4J0	Lmo2449 protein OS=Listeria monocytogenes GN=lmo2449 - [Q8Y4J0_LISMO]	1.1256e+09	8.0833e+08	2.41534e+08	8.01986e+08	2.60481e+08	3.98062e+08	0.718134	3.32039	1.52818	25.5267	13.87	6	8	20.6873	9.21	4	6	24.7028	10.84	5	7	18.7535	10.84	5	6	19.0928	10.21	5	6	32.1752	15.13	7	10	793	90.4927	6.04932
Q8Y4C1	ATP synthase subunit beta 2 OS=Listeria monocytogenes GN=atpD2 - [ATPB2_LISMO]	0	1.67973e+08	0	1.95557e+08	0	7.63596e+07	>	>	>					13.6693	8.88	2	3					7.57484	8.88	2	2					9.11927	11.21	3	3	473	51.5765	4.84326
Q8Y7P2	Lmo1231 protein OS=Listeria monocytogenes GN=lmo1231 - [Q8Y7P2_LISMO]	2.37723e+08	4.31632e+08	1.42605e+08	4.80113e+08	3.30972e+07	1.22211e+08	1.81569	3.36673	3.69248	6.70337	6.67	2	2	23.9062	18.6	6	7	8.3591	9.82	3	3	11.473	9.82	3	4	15.0305	9.47	3	4	17.8146	9.12	3	5	570	64.0363	5.85889
Q8Y8P8	Lmo0848 protein OS=Listeria monocytogenes GN=lmo0848 - [Q8Y8P8_LISMO]	0	677886001	0	0	0	0	>							8.54076	21.9	2	2																	242	26.6577	5.05908
Q8YA87	Lmo0272 protein OS=Listeria monocytogenes GN=lmo0272 - [Q8YA87_LISMO]	0	0	0	0	2.56182e+07	4.06665e+07			1.58741																	14.0508	10.37	2	4	5.34193	10.37	2	2	270	30.3326	4.89404
Q8Y5Q1	Lmo2005 protein OS=Listeria monocytogenes GN=lmo2005 - [Q8Y5Q1_LISMO]	0	2.08841e+08	0	100733679	0	0	>	>						11.1576	17.52	3	3					6.24244	12.08	2	2									331	37.8082	6.21436
P47847	Protein translocase subunit secA 1 OS=Listeria monocytogenes GN=secA1 - [SECA1_LISMO]	8.99489e+08	5.5017e+08	1.6344e+08	3.30859e+08	5.90243e+07	1.37529e+08	0.611648	2.02435	2.33004	30.8086	13.74	7	10	23.4056	14.58	7	8	19.9702	11.59	5	7	14.4498	7.29	5	5	9.65459	5.62	3	3	13.4484	5.62	3	4	837	94.6001	5.16064
Q8YAJ3	Lmo0132 protein OS=Listeria monocytogenes GN=lmo0132 - [Q8YAJ3_LISMO]	2.66003e+08	1.84502e+08	7.2791e+07	0	5.69422e+07	4.48026e+07	0.693608		0.786809	13.1741	11.75	5	5	10.8855	7.77	4	4	7.93437	5.98	3	3					5.00114	3.98	2	2	4.64271	4.18	2	2	502	55.0026	5.38916
Q8Y4C4	UDP-N-acetylglucosamine 1-carboxyvinyltransferase 1 OS=Listeria monocytogenes GN=murA1 - [MURA1_LISMO]	0	3.15194e+08	0	2.65474e+08	0	5.04659e+07	>	>	>					6.10829	7.21	2	2					9.25197	10.23	3	3					14.0979	15.35	4	5	430	45.9498	5.04639
Q8Y6Q7	Tryptophan synthase alpha chain OS=Listeria monocytogenes GN=trpA - [TRPA_LISMO]	8.37279e+07	1.56342e+08	0	0	0	0	1.86726			13.8146	21.01	2	4	10.1439	21.01	2	3																	257	27.873	5.77002
Q8Y4G8	Lmo2475 protein OS=Listeria monocytogenes GN=lmo2475 - [Q8Y4G8_LISMO]	125390202	1.9012e+08	0	0	0	7.93966e+07	1.51623		>	7.22315	5.21	2	2	9.3531	5.21	2	3													7.62992	5.21	2	2	576	64.0735	5.05908
Q48762	Uncharacterized protein Lmo0234 OS=Listeria monocytogenes GN=lmo0234 - [Y234_LISMO]	0	3.42933e+08	0	0	0	0	>							18.444	17.93	3	5																	357	39.4362	6.40479
Q8Y5N9	Diaminopimelate epimerase OS=Listeria monocytogenes GN=dapF - [DAPF_LISMO]	3.20015e+08	4.21927e+08	6.43824e+07	2.89981e+08	0	0	1.31846	4.50405		14.0002	20.97	4	4	11.851	17.93	3	3	6.3846	9.12	2	2	10.229	17.93	3	3									329	36.048	4.83057
Q8Y920	Lmo0722 protein OS=Listeria monocytogenes GN=lmo0722 - [Q8Y920_LISMO]	1.96535e+08	2.96978e+08	8.99945e+07	2.62866e+08	5.41066e+07	7.3073e+07	1.51107	2.92091	1.35054	8.57614	8.68	3	3	10.1793	11.11	3	3	11.7248	8.68	3	4	10.8534	9.9	3	3	13.4878	14.06	4	4	5.42945	5.73	2	2	576	62.7847	5.021
Q8Y7J0	DNA topoisomerase IV subunit A OS=Listeria monocytogenes GN=parC - [Q8Y7J0_LISMO]	3.1188e+08	2.54199e+08	6.69289e+07	2.07615e+08	3.03573e+07	7.12032e+07	0.815053	3.10202	2.34551	14.3093	9.16	5	5	15.3078	8.79	5	5	15.4065	4.52	3	5	10.6417	6.11	3	3	12.254	4.4	3	4	11.2293	4.15	3	4	819	92.1442	6.37939
Q8Y8A0	Putative N-acetyldiaminopimelate deacetylase OS=Listeria monocytogenes GN=dapL - [DAPL_LISMO]	2.11876e+08	2.68887e+08	0	0	0	0	1.26908			6.00749	9.43	2	2	7.45473	9.43	2	2																	371	41.604	5.23682
Q8Y6U9	Lmo1582 protein OS=Listeria monocytogenes GN=lmo1582 - [Q8Y6U9_LISMO]	7.6857e+07	0	0	0	0	0				10.1401	13.25	2	3																					332	37.1955	4.99561
Q8Y9J3	UPF0210 protein lmo0534 OS=Listeria monocytogenes GN=lmo0534 - [Y534_LISMO]	5.58485e+08	6.61935e+08	202325417	4.29493e+08	8.21888e+07	0	1.18523	2.12278		10.2711	13.53	3	3	12.7554	13.53	3	4	13.9437	13.53	3	4	12.7119	16.63	4	5	9.66702	13.53	3	3					451	46.8532	5.03369
Q8Y8R9	Lmo0825 protein OS=Listeria monocytogenes GN=lmo0825 - [Q8Y8R9_LISMO]	1.83509e+08	263841325	2.10286e+07	3.66737e+08	0	6.81401e+07	1.43776	17.4399	>	10.8558	16.9	3	3	13.0013	16.9	3	4	6.85026	11.74	2	2	17.7474	16.9	3	6					14.6184	16.9	3	4	426	45.8255	5.73193
Q8Y5T9	Lmo1966 protein OS=Listeria monocytogenes GN=lmo1966 - [Q8Y5T9_LISMO]	0	35525244	0	0	0	0	>							5.44679	15.07	2	2																	219	25.2369	9.56885
Q8Y6Q6	Tryptophan synthase beta chain OS=Listeria monocytogenes GN=trpB - [TRPB_LISMO]	0	0	0	0	0	9.5722e+07			>																					5.93807	10	2	2	400	43.6929	5.77002
Q9EXF8	Beta-glucosidase OS=Listeria monocytogenes GN=bglA - [Q9EXF8_LISMO]	0	4.99683e+08	0	0	0	1.57595e+08	>		>					8.92034	11.68	3	3													5.31717	5.52	2	2	471	53.6123	5.13525
Q8Y568	Lmo2208 protein OS=Listeria monocytogenes GN=lmo2208 - [Q8Y568_LISMO]	213881473	1.97943e+08	3.22354e+07	0	2.3209e+07	5.5021e+07	0.92548		2.37067	6.21883	11.72	2	2	7.70936	11.72	2	2	7.99557	11.72	2	2					7.56763	11.72	2	2	11.9421	11.72	2	3	256	28.5302	4.66553
Q9KGV9	Lmo2185 protein OS=Listeria monocytogenes GN=lmo2185 - [Q9KGV9_LISMO]	0	2.81852e+08	0	1.46251e+08	0	1.13554e+08	>	>	>					29.6212	19.86	6	8					14.0437	12.65	4	4					17.2139	17.05	5	5	569	63.341	6.91748
Q8Y5F4	Lmo2110 protein OS=Listeria monocytogenes GN=lmo2110 - [Q8Y5F4_LISMO]	2.58094e+08	3.53987e+08	3.95135e+07	2.25575e+08	3.12451e+07	1.20306e+08	1.37154	5.70881	3.85038	9.26087	12.89	3	3	12.5636	12.89	3	4	11.7001	12.89	3	4	11.4388	12.89	3	4	8.31522	7.55	2	3	9.4425	12.89	3	3	318	35.3438	5.03369
Q8Y695	Ffh protein OS=Listeria monocytogenes GN=ffh - [Q8Y695_LISMO]	22163248	1.54478e+08	0	162119470	0	7.45711e+07	6.97002	>	>	7.3559	6.67	2	2	12.4518	10.22	3	3					20.3161	14	4	5					24.6451	16.89	5	6	450	49.6821	9.18799
Q8Y8H3	Lmo0931 protein OS=Listeria monocytogenes GN=lmo0931 - [Q8Y8H3_LISMO]	0	6.41641e+08	0	4.1442e+08	0	1.50781e+08	>	>	>					10.9681	16.62	4	4					12.0262	13.29	3	5					8.12529	9.37	3	3	331	37.9346	5.12256
Q92FQ6	DnaC protein OS=Listeria monocytogenes GN=dnaC - [Q92FQ6_LISMO]	0	2.37692e+08	0	3.27893e+08	0	1.03259e+08	>	>	>					22.3437	10.89	2	5					23.9336	14.89	3	6					12.0281	10.89	2	3	450	50.0045	4.84326
Q8Y3S6	Lmo2755 protein OS=Listeria monocytogenes GN=lmo2755 - [Q8Y3S6_LISMO]	2.91127e+08	2.54377e+08	1.14046e+08	1.31301e+08	0	0	0.873766	1.1513		13.1311	9.19	4	5	11.7135	11.17	4	4	12.681	14.59	5	5	5.97528	6.49	2	2									555	62.7578	5.23682
Q8Y6V2	Alanine dehydrogenase OS=Listeria monocytogenes GN=lmo1579 - [Q8Y6V2_LISMO]	0	146035319	0	0	0	0	>							5.70183	11.89	2	2																	370	39.5856	5.41455
Q8YAG4	Lmo0162 protein OS=Listeria monocytogenes GN=lmo0162 - [Q8YAG4_LISMO]	1.12062e+08	1.4571e+08	2.74213e+07	0	1.36537e+07	2.73008e+07	1.30027		1.99952	6.01265	9.09	2	2	8.44652	12.42	3	3	5.11521	9.09	2	2					5.92577	9.09	2	2	6.29208	9.09	2	2	330	37.0362	5.88428
Q8YAG2	Initiation-control protein yabA OS=Listeria monocytogenes GN=lmo0164 - [YABA_LISMO]	2.29262e+07	6.38786e+07	0	1.0469e+08	0	8.0854e+06	2.78627	>	>	15.8084	19.38	2	4	15.412	19.38	2	4					7.5702	19.38	2	2					13.2616	19.38	2	4	129	14.7751	4.80518
Q8Y7C8	Lmo1356 protein OS=Listeria monocytogenes GN=lmo1356 - [Q8Y7C8_LISMO]	4.27245e+10	6.20641e+09	3.2897e+09	1.45962e+09	6.64679e+08	2.46596e+09	0.145266	0.443695	3.71	371.71	19.35	3	104	145.63	19.35	3	36	431.841	19.35	3	127	320.508	19.35	3	92	189.686	19.35	3	54	209.74	19.35	3	47	155	16.5666	4.44971
Q8Y741	Lmo1481 protein OS=Listeria monocytogenes GN=lmo1481 - [Q8Y741_LISMO]	0	3.81404e+07	0	1.57819e+07	0	1.52064e+07	>	>	>					8.96787	9.62	3	4					4.81757	4.96	2	2					7.15494	9.33	2	2	343	39.9712	5.74463
Q8Y420	Deoxyguanosinetriphosphate triphosphohydrolase-like protein OS=Listeria monocytogenes GN=lmo2657 - [DGTL2_LISMO]	2.66421e+08	4.40143e+08	1.97929e+08	3.76352e+08	4.09793e+07	1.15531e+08	1.65206	1.90144	2.81924	16.7945	14.62	4	5	14.2175	13.98	4	5	6.23171	6.67	2	2	10.4343	9.89	3	3	7.11759	6.88	2	2	14.5568	13.12	5	5	465	53.4511	5.45264
Q8Y793	Putative competence-damage inducible protein OS=Listeria monocytogenes GN=cinA - [CINA_LISMO]	2.47123e+08	4.76689e+08	4.41849e+07	2.07607e+08	2.81075e+07	1.15768e+08	1.92895	4.69859	4.11875	15.6004	11.59	3	6	18.1955	14.49	4	6	7.92003	6.76	2	3	10.9513	11.59	3	4	4.61589	6.76	2	2	17.057	14.49	4	6	414	45.6474	5.21143
Q8Y9N8	Lmo0487 protein OS=Listeria monocytogenes GN=lmo0487 - [Q8Y9N8_LISMO]	0	0	0	1.56946e+08	0	0		>														6.34642	19.01	2	2									242	26.9765	4.4624
P66461	30S ribosomal protein S18 OS=Listeria monocytogenes GN=rpsR - [RS18_LISMO]	1.21965e+09	2691835634	2.76597e+08	2.11375e+09	2.77344e+08	1.03857e+09	2.20706	7.64198	3.7447	9.54973	18.99	2	3	8.62923	18.99	2	3	7.75523	18.99	2	3	10.025	18.99	2	4	12.5017	18.99	2	5	14.0865	18.99	2	5	79	9.09206	11.0337
Q8Y7C9	Lmo1354 protein OS=Listeria monocytogenes GN=lmo1354 - [Q8Y7C9_LISMO]	0	0	0	0	0	1.84399e+06			>																					7.29647	9.92	2	2	353	38.9919	5.07178
Q8Y6K9	2-succinyl-5-enolpyruvyl-6-hydroxy-3-cyclohexene-1-carboxylate synthase OS=Listeria monocytogenes GN=menD - [MEND_LISMO]	2.63243e+08	0	1.38737e+08	2.54361e+08	0	0		1.83341		12.6906	11.55	3	3					18.1892	11.38	4	5	8.23685	8.1	2	2									580	64.6442	5.79541
Q8Y887	Lmo1030 protein OS=Listeria monocytogenes GN=lmo1030 - [Q8Y887_LISMO]	2.32276e+08	1.67369e+08	5.59255e+07	0	0	0	0.720562			8.57105	14.62	3	3	5.99691	7.6	2	2	8.41479	11.11	3	3													342	38.4661	5.70654
Q8Y679	Lmo1820 protein OS=Listeria monocytogenes GN=lmo1820 - [Q8Y679_LISMO]	855293784	5.167e+08	1.17546e+08	2.31703e+08	1.10088e+08	1.83908e+08	0.60412	1.97117	1.67055	22.98	16.95	7	8	25.7484	14.96	6	9	28.7356	16.95	7	10	9.03776	7.18	3	3	16.2661	12.98	5	6	16.0835	12.82	5	5	655	72.1423	5.35107
Q8Y4D8	Peptide chain release factor 2 OS=Listeria monocytogenes GN=prfB - [RF2_LISMO]	0	4.73651e+08	0	4.21346e+08	0	1.73662e+08	>	>	>					13.9735	11.75	4	4					8.78115	13.39	3	3					10.2252	13.39	3	3	366	41.9697	4.94482
Q8Y494	Probable DNA-directed RNA polymerase subunit delta OS=Listeria monocytogenes GN=rpoE - [RPOE_LISMO]	0	2.61574e+08	0	0	0	0	>							5.91619	18.54	2	2																	178	20.6277	3.99268
P22262	Listeriolysin regulatory protein OS=Listeria monocytogenes GN=prfA - [PRFA_LISMO]	0	778892790	0	0	0	2.39338e+08	>		>					7.4089	18.14	2	2													11.1733	18.14	3	3	237	27.284	8.06006
Q8Y776	UDP-N-acetylenolpyruvoylglucosamine reductase OS=Listeria monocytogenes GN=murB - [MURB_LISMO]	1.56328e+08	0	0	0	0	0				10.9202	14.09	2	3																					298	32.1859	6.65381
Q929C7	Lmo2248 protein OS=Listeria monocytogenes GN=lmo2248 - [Q929C7_LISMO]	8.04859e+08	1.34289e+09	9.04563e+07	7.00954e+08	6.59263e+07	1.29661e+08	1.66848	7.74909	1.96676	25.1922	17.48	3	7	20.2429	17.96	4	6	13.8855	13.59	2	4	6.45096	13.59	2	2	10.2908	13.59	2	3	14.3667	17.48	3	4	206	23.8889	4.81787
Q8Y5M6	Lmo2031 protein OS=Listeria monocytogenes GN=lmo2031 - [Q8Y5M6_LISMO]	0	6.09434e+08	0	0	0	0	>							8.2582	17.9	2	3																	229	25.8741	5.24951
Q8Y831	Lmo1087 protein OS=Listeria monocytogenes GN=lmo1087 - [Q8Y831_LISMO]	0	1.48213e+08	0	2.60759e+08	0	0	>	>						13.2013	16.42	2	3					11.9355	16.42	2	3									341	38.4625	4.94482
Q8Y7M0	Lmo1254 protein OS=Listeria monocytogenes GN=lmo1254 - [Q8Y7M0_LISMO]	4.87816e+08	3.19693e+08	1.20767e+08	1.95778e+08	5.21571e+07	1.18224e+08	0.655354	1.62112	2.26668	21.5761	11.86	4	6	18.7748	11.86	4	5	8.65825	6.39	2	3	6.63523	6.39	2	2	10.1705	5.66	2	3	17.9268	9.49	3	5	548	63.1542	5.17334
Q8Y9K6	Lmo0521 protein OS=Listeria monocytogenes GN=lmo0521 - [Q8Y9K6_LISMO]	2.28269e+08	4.65682e+08	9.67798e+07	3.52348e+08	0	1.32257e+08	2.04006	3.64072	>	14.4346	15.75	3	4	13.3277	15.75	3	4	25.1925	15.75	3	7	9.64019	13.24	3	3					10.758	15.75	3	3	438	48.9602	5.14795
Q92BX8	Two-component response regulator OS=Listeria monocytogenes GN=lisR - [Q92BX8_LISMO]	0	481920139	2.02965e+07	0	0	5.46409e+07	>		>					8.59225	4.87	2	3	4.48866	4.87	2	2									8.41654	4.87	2	3	226	26.4029	5.07178
Q8Y8L3	Lmo0884 protein OS=Listeria monocytogenes GN=lmo0884 - [Q8Y8L3_LISMO]	0	3.35056e+08	0	3.99177e+08	6.73978e+07	1.529e+08	>	>	2.26863					19.6099	13.94	4	5					17.2919	13.94	4	5	9.27239	10.24	3	3	11.8581	10.68	3	3	459	50.266	6.27783
Q8YAM0	EIIMant PTS permease IID subunit OS=Listeria monocytogenes GN=mptD - [Q8YAM0_LISMO]	3.37408e+08	6.47366e+08	0	3.25774e+08	0	1.32035e+08	1.91864	>	>	7.2525	12.54	2	2	11.2447	12.54	2	3					7.29296	12.54	2	2					8.09464	12.54	2	2	303	33.3899	9.18799
Q8Y463	Lmo2592 protein OS=Listeria monocytogenes GN=lmo2592 - [Q8Y463_LISMO]	0	2.59668e+08	0	0	0	0	>							4.69664	13.07	2	2																	283	31.4432	5.30029
Q8Y712	Lmo1514 protein OS=Listeria monocytogenes GN=lmo1514 - [Q8Y712_LISMO]	1.20188e+08	1.95194e+08	0	8.39979e+07	0	3.58224e+07	1.62408	>	>	4.85435	6.82	2	2	11.3148	14.82	4	4					4.86929	6.12	2	2					9.00096	11.53	3	3	425	46.5853	6.91748
Q8Y4F7	Lmo2487 protein OS=Listeria monocytogenes GN=lmo2487 - [Q8Y4F7_LISMO]	0	1.71916e+08	0	159174895	0	6.51584e+07	>	>	>					12.5089	9.76	4	4					5.32652	7.86	2	2					11.6858	9.52	4	4	420	47.2951	5.46533
O05551	AA protein OS=Listeria monocytogenes GN=lmaA - [O05551_LISMO]	0	0	0	0	0	9.90937e+07			>																					6.76134	17.06	2	2	170	17.9829	4.61475
Q8YA12	Lmo0354 protein OS=Listeria monocytogenes GN=lmo0354 - [Q8YA12_LISMO]	3.36295e+08	6.32137e+08	6.25426e+07	0	0	1.23192e+08	1.87971		>	8.53236	7.48	3	3	5.82647	4.72	2	2	8.57058	7.48	3	3									6.00185	6.5	2	2	508	58.0497	6.7417
Q8Y624	Formate--tetrahydrofolate ligase OS=Listeria monocytogenes GN=fhs - [FTHS_LISMO]	0	3.26934e+08	0	2.4441e+08	0	1.30165e+08	>	>	>					11.8179	10.54	4	4					8.44904	9.11	3	3					14.0451	13.57	5	5	560	60.0483	5.60498
Q8Y5R4	Lmo1992 protein OS=Listeria monocytogenes GN=lmo1992 - [Q8Y5R4_LISMO]	0	471891466	0	0	0	0	>							5.79229	16.32	2	2																	239	26.7522	4.7417
Q8Y5Z9	BirA protein OS=Listeria monocytogenes GN=birA - [Q8Y5Z9_LISMO]	0	2.19546e+08	0	0	0	0	>							9.34883	16.31	3	3																	325	36.2142	5.93506
Q8Y8V1	Lmo0791 protein OS=Listeria monocytogenes GN=lmo0791 - [Q8Y8V1_LISMO]	0	2.42104e+08	0	0	0	7.69098e+07	>		>					5.03533	11.11	2	2													5.62285	11.11	2	2	216	23.9678	4.75439
Q8Y490	Lmo2565 protein OS=Listeria monocytogenes GN=lmo2565 - [Q8Y490_LISMO]	1.63944e+09	0	2.42906e+08	2.70582e+08	0	0		1.11394		10.7075	11.14	2	3					12.4648	11.14	2	4	14.2678	14.32	3	4									440	50.822	5.41455
Q8Y3X5	DnaX protein OS=Listeria monocytogenes GN=dnaX - [Q8Y3X5_LISMO]	0	2.60056e+08	0	2.19979e+08	1.39515e+07	4.83241e+07	>	>	3.46371					30.9724	6.56	4	10					11.1097	4.49	3	4	9.09133	2.59	2	3	12.9408	6.56	4	4	579	63.4196	5.37646
Q8Y8S7	Lmo0817 protein OS=Listeria monocytogenes GN=lmo0817 - [Q8Y8S7_LISMO]	0	4.3525e+08	0	0	0	0	>							6.66779	16.06	2	2																	137	15.6997	4.67822
Q8Y6A0	Lmo1795 protein OS=Listeria monocytogenes GN=lmo1795 - [Q8Y6A0_LISMO]	0	1.03889e+08	0	0	0	3.10093e+07	>		>					7.24346	15.98	2	2													6.53404	15.98	2	2	244	27.031	5.96045
Q8Y616	Lmo1886 protein OS=Listeria monocytogenes GN=lmo1886 - [Q8Y616_LISMO]	2.13375e+08	2.15859e+08	6.03682e+07	2.02912e+08	2.79262e+07	4.12955e+07	1.01164	3.36125	1.47874	22.3557	12.75	5	6	17.1753	10.96	4	4	12.3738	10.96	3	3	14.0061	10.96	3	4	7.18908	7.37	2	2	12.0219	10.96	3	3	502	57.3198	4.81787
Q8YA98	Lmo0256 protein OS=Listeria monocytogenes GN=lmo0256 - [Q8YA98_LISMO]	3.71477e+09	2.89712e+08	0	0	0	7.59316e+07	0.0779893		>	12.4134	15.92	3	4	12.7579	15.92	3	4													9.45393	15.92	3	3	201	22.5474	6.40479
Q8YA88	Lmo0271 protein OS=Listeria monocytogenes GN=lmo0271 - [Q8YA88_LISMO]	343341746	4.571e+08	6.40913e+07	3.44189e+08	0	1.7588e+08	1.33133	5.37029	>	11.6395	13.6	4	4	13.2774	13.6	4	5	5.47585	7.53	2	2	8.41081	11.51	3	3					5.68062	7.53	2	2	478	54.5468	5.14795
Q9L723	Protein RecA OS=Listeria monocytogenes GN=recA - [RECA_LISMO]	0	4.15485e+08	0	1.26989e+08	0	7.48682e+07	>	>	>					5.33658	8.91	2	2					9.29415	10.63	3	3					7.86215	8.91	2	3	348	37.9706	5.16064
Q8Y7N2	Lmo1242 protein OS=Listeria monocytogenes GN=lmo1242 - [Q8Y7N2_LISMO]	180129093	0	2.60076e+07	0	0	0				5.39323	15.74	2	2					5.58975	15.74	2	2													197	22.5478	5.73193
Q8Y3R3	Glutathione biosynthesis bifunctional protein gshAB OS=Listeria monocytogenes GN=gshAB - [GSHAB_LISMO]	0	0	0	3.46011e+08	0	0		>														10.4146	4.81	2	3									769	87.6737	5.03369
Q8Y8E3	Lmo0961 protein OS=Listeria monocytogenes GN=lmo0961 - [Q8Y8E3_LISMO]	0	2.35662e+08	3.68514e+07	2.31867e+08	0	5.33327e+07	>	6.29194	>					20.4191	15.69	4	5	7.20237	8.33	2	2	8.23465	8.33	2	2					8.42402	8.33	2	2	408	45.7488	5.26221
Q8YAD1	Peptidyl-tRNA hydrolase OS=Listeria monocytogenes GN=pth - [PTH_LISMO]	169754790	1.96709e+08	5.49891e+07	1.36454e+08	0	5.50392e+07	1.15878	2.48147	>	7.06943	15.59	2	2	12.4958	15.59	2	3	8.20388	15.59	2	2	6.80188	15.59	2	2					11.7848	15.59	2	3	186	20.966	9.21729
Q8Y677	Lmo1822 protein OS=Listeria monocytogenes GN=lmo1822 - [Q8Y677_LISMO]	1.58038e+08	2.68195e+08	0	2.16288e+08	0	9.06442e+07	1.69703	>	>	11.0258	6.76	2	3	22.787	15.32	4	7					9.26334	11.94	3	3					19.0531	15.32	4	5	444	49.8966	6.75635
Q8Y3V1	Lmo2730 protein OS=Listeria monocytogenes GN=lmo2730 - [Q8Y3V1_LISMO]	0	2.71788e+08	0	0	0	0	>							6.54896	15.27	2	2																	203	22.5385	4.80518
Q8Y5W7	Lmo1938 protein OS=Listeria monocytogenes GN=lmo1938 - [Q8Y5W7_LISMO]	0	0	0	2.33282e+08	0	2.20744e+08		>	>													10.9095	12.6	3	4					8.31814	8.4	2	3	381	41.4065	4.57666
Q8Y3Y6	Thymidylate kinase OS=Listeria monocytogenes GN=tmk - [KTHY_LISMO]	0	0	0	8.03745e+07	0	0		>														6.71977	14.9	2	2									208	23.0689	5.23682
Q8Y6R2	Lmo1622 protein OS=Listeria monocytogenes GN=lmo1622 - [Q8Y6R2_LISMO]	0	1.49506e+08	0	0	0	0	>							13.6307	14.86	2	4																	276	29.7772	5.63037
Q8Y5Q8	Lmo1998 protein OS=Listeria monocytogenes GN=lmo1998 - [Q8Y5Q8_LISMO]	1.19578e+08	0	0	0	0	0				9.81022	14.8	3	3																					331	38.1138	5.73193
Q8Y6A9	Lmo1782 protein OS=Listeria monocytogenes GN=lmo1782 - [Q8Y6A9_LISMO]	0	0	0	3.1756e+08	0	0		>														8.81381	10.36	2	3									251	29.0805	5.021
Q8Y5S2	Dihydroxy-acid dehydratase OS=Listeria monocytogenes GN=ilvD - [ILVD_LISMO]	0	258456072	0	0	0	2.00439e+08	>		>					13.1519	13.65	4	4													22.4211	11.35	4	6	564	59.8364	5.70654
Q8Y637	DegV domain-containing protein lmo1863 OS=Listeria monocytogenes GN=lmo1863 - [Y1863_LISMO]	5.8985e+08	2.12822e+08	8.13893e+07	1.91324e+08	0	0	0.360807	2.35072		5.22917	10.39	2	2	7.33025	10.39	2	2	5.24466	10.39	2	2	9.20949	14.7	3	3									279	30.941	5.23682
O85045	Alanine racemase OS=Listeria monocytogenes GN=alr - [ALR_LISMO]	1.58469e+08	0	0	0	0	0				6.79443	14.67	2	2																					368	40.9612	6.16357
Q8Y5Y1	Lmo1922 protein OS=Listeria monocytogenes GN=lmo1922 - [Q8Y5Y1_LISMO]	0	5.25947e+08	0	4.26808e+08	0	0	>	>						5.36574	8.87	2	2					4.9555	9.11	2	2									417	47.6605	4.31006
Q8YAE5	Lmo0185 protein OS=Listeria monocytogenes GN=lmo0185 - [Q8YAE5_LISMO]	0	0	0	0	8.5506e+07	0																				4.83613	14.4	2	2					257	29.38	5.07178
Q8Y5N7	DivIVA protein OS=Listeria monocytogenes GN=divIVA - [Q8Y5N7_LISMO]	0	454553377	0	0	0	110941841	>		>					6.38703	14.29	2	2													6.23306	14.29	2	2	175	20.3364	4.83057
Q8Y706	RelA protein OS=Listeria monocytogenes GN=relA - [Q8Y706_LISMO]	4.31417e+08	3.9461e+08	2.27128e+08	4.38826e+08	7.59829e+07	5.43721e+07	0.914684	1.93207	0.715584	22.7461	10.7	6	8	16.7909	10.7	5	6	16.7006	9.21	5	6	14.236	9.08	4	5	18.7023	9.21	5	6	9.30742	7.72	3	3	738	84.661	7.43018
Q8Y4D5	DegV domain-containing protein lmo2514 OS=Listeria monocytogenes GN=lmo2514 - [Y2514_LISMO]	0	2.74107e+08	0	0	0	5.72651e+07	>		>					7.00522	8.48	2	2													6.4012	11.31	2	2	283	31.2383	5.30029
Q8YAF9	Ribosomal RNA small subunit methyltransferase I OS=Listeria monocytogenes GN=rsmI - [Q8YAF9_LISMO]	3.59123e+08	2.02345e+08	5.5837e+07	144546368	0	8.36671e+07	0.563442	2.58872	>	13.8718	13.99	3	4	11.1178	10.24	2	3	9.73617	8.87	2	3	12.4834	13.99	3	4					10.9416	10.24	2	3	293	33.2111	5.74463
Q8Y3S5	DNA topoisomerase OS=Listeria monocytogenes GN=topB - [Q8Y3S5_LISMO]	4.29097e+08	2.48293e+08	6.03853e+07	1.13064e+08	5.79976e+07	7.32328e+07	0.57864	1.87238	1.26269	21.1247	8.23	5	8	15.2853	7.81	5	6	17.0186	11.44	7	7	7.80146	5.02	3	3	13.0015	8.09	5	5	7.13521	4.32	3	3	717	81.4796	9.45166
Q8Y9D8	Lmo0592 protein OS=Listeria monocytogenes GN=lmo0592 - [Q8Y9D8_LISMO]	0	0	0	0	0	9.49441e+07			>																					5.05845	13.89	2	2	180	19.9583	5.90967
Q8YAR3	Lmo0052 protein OS=Listeria monocytogenes GN=lmo0052 - [Q8YAR3_LISMO]	1.01701e+08	1.03774e+08	0	8.7359e+07	0	0	1.02039	>		6.67193	4.87	2	2	31.1424	11.42	4	7					13.3724	8.98	3	4									657	74.7996	5.30029
Q8Y6E5	Adenine deaminase OS=Listeria monocytogenes GN=ade - [ADEC_LISMO]	2.73001e+08	0	1.49731e+08	0	6.39749e+07	0				23.9692	13.62	4	7					10.579	11.9	3	3					9.97678	11.9	3	3					580	62.086	5.17334
Q8Y713	Lmo1513 protein OS=Listeria monocytogenes GN=lmo1513 - [Q8Y713_LISMO]	5.73251e+08	0	0	0	0	0				5.04689	9.16	2	2																					382	41.7042	5.59229
Q8Y832	Putative 2-C-methyl-D-erythritol 4-phosphate cytidylyltransferase 2 OS=Listeria monocytogenes GN=ispD2 - [ISPD2_LISMO]	2.74472e+08	2.40119e+08	0	0	0	0	0.874842			5.67784	9.75	2	2	5.23328	8.47	2	2																	236	26.695	6.07471
Q8YAR1	Adenylosuccinate synthetase OS=Listeria monocytogenes GN=purA - [PURA_LISMO]	2.27845e+08	5.83441e+08	0	2.38338e+08	0	0	2.56069	>		6.10137	6.05	2	2	4.56197	4.88	2	2					9.31437	5.58	2	3									430	47.5755	5.85889
Q8YA78	Lmo0281 protein OS=Listeria monocytogenes GN=lmo0281 - [Q8YA78_LISMO]	0	1.73237e+09	0	0	0	7.903e+07	>		>					15.228	13.45	2	5													10.0763	13.45	3	3	223	25.9732	8.99756
Q8Y4A8	Peptide chain release factor 1 OS=Listeria monocytogenes GN=prfA - [RF1_LISMO]	0	1.31293e+08	0	0	0	0	>							9.91696	13.41	2	3																	358	40.6844	5.0083
Q8Y5E4	Lmo2120 protein OS=Listeria monocytogenes GN=lmo2120 - [Q8Y5E4_LISMO]	0	191856483	0	0	0	0	>							6.38531	13.19	2	2																	273	30.4255	8.29443
Q8Y8G2	Lmo0942 protein OS=Listeria monocytogenes GN=lmo0942 - [Q8Y8G2_LISMO]	8.52371e+07	2.01604e+08	0	0	0	0	2.36521			5.60088	8.49	2	2	11.2962	9.82	3	4																	601	68.3898	4.90674
Q8Y8P9	Lmo0847 protein OS=Listeria monocytogenes GN=lmo0847 - [Q8Y8P9_LISMO]	0	1.47477e+08	2.0648e+07	0	1.36922e+07	0	>							7.67438	4.17	2	3	4.3008	4.17	2	2					5.28476	5	2	2					480	53.2619	8.5874
Q8Y499	Lmo2555 protein OS=Listeria monocytogenes GN=lmo2555 - [Q8Y499_LISMO]	0	2.07955e+08	0	3.24014e+08	0	0	>	>						11.0928	13.11	3	3					5.78411	8.2	2	2									427	47.8521	7.43018
Q8Y6G6	Lmo1721 protein OS=Listeria monocytogenes GN=lmo1721 - [Q8Y6G6_LISMO]	2.54391e+08	171107713	0	2.30017e+08	3.7527e+07	7.34473e+07	0.672618	>	1.95719	13.2553	5.72	4	5	19.9858	7.51	4	6					13.8429	6.17	3	5	10.716	5.72	4	4	11.0934	4.37	3	4	892	101.371	5.22412
Q8Y6W0	6-phosphofructokinase OS=Listeria monocytogenes GN=pfkA - [K6PF_LISMO]	0	4.75092e+08	0	0	0	0	>							8.07253	12.85	2	2																	319	34.399	5.70654
Q8Y7P0	UvrABC system protein C OS=Listeria monocytogenes GN=uvrC - [UVRC_LISMO]	2.53917e+08	3.29415e+08	3.26957e+07	2.16722e+08	4.94762e+07	1.083e+08	1.29733	6.62845	2.18892	13.0315	6.8	3	4	12.5571	9.29	4	4	5.70966	3.98	2	2	11.3139	9.29	4	4	9.59501	8.13	3	3	5.14199	5.31	2	2	603	69.271	8.74854
Q8Y5E9	Lmo2115 protein OS=Listeria monocytogenes GN=lmo2115 - [Q8Y5E9_LISMO]	9.44673e+08	4.88755e+08	4.83337e+08	6.30219e+08	2.1409e+08	1.18698e+08	0.51738	1.30389	0.554431	15.9385	12.69	4	4	32.4142	12.69	4	8	24.1776	12.69	4	6	14.8631	10.22	3	4	29.734	12.69	4	8	17.2849	12.69	4	5	646	71.5958	9.37842
Q8YAW2	Chromosomal replication initiator protein dnaA OS=Listeria monocytogenes GN=dnaA - [DNAA_LISMO]	5.97867e+07	1.62799e+08	0	7.35289e+07	0	6.11467e+07	2.723	>	>	15.7399	9.98	3	5	25.351	10.2	3	7					11.7448	7.54	2	3					9.41919	7.54	2	3	451	51.3495	6.0874
Q8Y433	Lmo2641 protein OS=Listeria monocytogenes GN=lmo2641 - [Q8Y433_LISMO]	0	1.38915e+08	0	0	0	0	>							5.3438	12.58	2	2																	326	36.7369	7.53271
Q8Y6C5	Bifunctional purine biosynthesis protein purH OS=Listeria monocytogenes GN=purH - [PUR9_LISMO]	0	1.838e+08	0	0	0	0	>							9.49437	9.63	3	3																	509	54.9654	5.41455
Q8Y6X7	Delta-aminolevulinic acid dehydratase OS=Listeria monocytogenes GN=hemB - [Q8Y6X7_LISMO]	157758324	0	5.07958e+07	1.37357e+08	0	0		2.70411		5.22324	7.1	2	2					8.2851	12.35	3	3	5.28173	7.1	2	2									324	36.2314	5.38916
Q8Y3L2	Lmo2823 protein OS=Listeria monocytogenes GN=lmo2823 - [Q8Y3L2_LISMO]	0	0	0	3.23685e+08	0	0		>														7.11194	10.17	2	2									413	46.6376	4.81787
Q8Y8G3	Lmo0941 protein OS=Listeria monocytogenes GN=lmo0941 - [Q8Y8G3_LISMO]	0	2.46026e+08	0	2.07544e+08	4.38025e+07	1.01991e+08	>	>	2.32843					6.52465	8.95	2	2					11.1906	12.35	3	4	6.03277	8.95	2	2	9.08522	8.95	2	3	324	37.5195	4.75439
Q8Y6V5	Lmo1576 protein OS=Listeria monocytogenes GN=lmo1576 - [Q8Y6V5_LISMO]	0	2.48635e+08	0	0	0	67281593	>		>					9.0238	12.13	3	3													4.98234	5.49	2	2	437	48.6766	6.46826
Q8Y786	Pyruvate formate-lyase OS=Listeria monocytogenes GN=pflB - [Q8Y786_LISMO]	0	0	0	2.29905e+08	0	0		>														9.27444	7.81	2	2									743	83.7722	5.74463
Q8Y6K3	5-methyltetrahydropteroyltriglutamate--homocysteine methyltransferase OS=Listeria monocytogenes GN=metE - [METE_LISMO]	2.87683e+08	8.84844e+07	5.17028e+07	1.3533e+08	2.87654e+07	0	0.307576	2.61746		16.1255	9.28	4	5	6.84028	3.4	2	2	5.62014	3.4	2	2	7.84222	6.14	3	3	11.2787	6.93	3	4					765	86.1816	5.05908
Q8Y4I4	2,3-bisphosphoglycerate-independent phosphoglycerate mutase OS=Listeria monocytogenes GN=gpmI - [GPMI_LISMO]	0	2.70754e+08	0	334430388	0	9.66375e+07	>	>	>					7.46673	6.27	2	2					6.64136	7.25	2	2					6.92439	7.25	2	2	510	56.1045	5.24951
Q8Y841	Lmo1077 protein OS=Listeria monocytogenes GN=lmo1077 - [Q8Y841_LISMO]	6.7082e+08	5.17536e+08	0	2.49471e+08	0	0	0.771498	>		5.32743	3.38	2	2	5.17807	3.56	2	2					7.66543	6.41	3	3									562	65.5514	6.354
Q8Y7K2	DNA topoisomerase OS=Listeria monocytogenes GN=topA - [Q8Y7K2_LISMO]	0	2.73546e+08	0	1.05738e+08	0	8.15983e+07	>	>	>					10.7032	8.38	3	4					5.55746	6.5	2	2					7.30788	6.21	2	3	692	79.3741	9.08545
Q8Y647	Lmo1853 protein OS=Listeria monocytogenes GN=lmo1853 - [Q8Y647_LISMO]	0	1.67092e+08	3.9417e+07	0	0	0	>							6.63959	4.21	2	2	5.48069	4.34	2	2													737	79.8888	5.37646
Q8YAU5	Beta-glucosidase OS=Listeria monocytogenes GN=lmo0018 - [Q8YAU5_LISMO]	2.12783e+08	1.36963e+08	3.46391e+07	1.14939e+08	1.97373e+07	3.92793e+07	0.643675	3.31819	1.9901	9.49216	11.11	3	3	12.4803	11.11	3	4	6.58449	7.76	2	2	10.503	11.11	3	4	6.6342	7.76	2	2	6.61958	8.39	2	2	477	54.8647	5.2876
Q8Y6Q3	Anthranilate phosphoribosyltransferase OS=Listeria monocytogenes GN=trpD - [TRPD_LISMO]	0	232943775	0	0	0	6.99325e+07	>		>					4.69376	5.31	2	2													4.67576	5.31	2	2	339	36.5728	5.09717
Q8Y3M4	tRNA modification GTPase mnmE OS=Listeria monocytogenes GN=mnmE - [MNME_LISMO]	1.70848e+08	0	0	2.7357e+08	0	1.20031e+08		>	>	6.46578	6.56	2	2									6.63762	6.56	2	2					6.29117	6.56	2	2	457	50.3833	4.67822
Q8Y7L9	Lmo1255 protein OS=Listeria monocytogenes GN=lmo1255 - [Q8Y7L9_LISMO]	3.95601e+08	3.88508e+08	2.18242e+08	3.68393e+08	9.6829e+07	5.70639e+07	0.98207	1.688	0.589327	6.67577	5.87	2	2	11.306	5.87	2	3	7.09025	5.87	2	2	5.99433	5.87	2	2	6.19292	5.87	2	2	5.5998	5.87	2	2	494	53.4565	6.80029
Q8Y5X9	TyrA protein OS=Listeria monocytogenes GN=tyrA - [Q8Y5X9_LISMO]	0	0	0	0	0	1.1989e+08			>																					6.98129	7.08	2	2	367	40.4077	5.23682
Q8YAW1	DNA polymerase III, beta chain OS=Listeria monocytogenes GN=dnaN - [Q8YAW1_LISMO]	0	1.74315e+08	0	1.5396e+08	0	0	>	>						12.7852	10.24	2	3					14.6742	10.24	2	4									381	42.4032	4.79248
Q8Y6E2	Lmo1745 protein OS=Listeria monocytogenes GN=lmo1745 - [Q8Y6E2_LISMO]	0	599539242	0	3.34827e+08	0	2.76533e+08	>	>	>					6.69052	5.33	2	2					5.61476	9.78	2	2					5.45376	5.33	2	2	225	26.3975	4.90674
Q9KHT9	ATPase OpuCA OS=Listeria monocytogenes GN=opuCA - [Q9KHT9_LISMO]	0	6.78001e+07	0	0	0	0	>							8.25752	10.08	2	2																	397	45.1807	5.16064
Q8Y3Y8	Lmo2691 protein OS=Listeria monocytogenes GN=lmo2691 - [Q8Y3Y8_LISMO]	1.98289e+07	1.15043e+08	0	2.19258e+07	0	0	5.80179	>		9.4031	9.83	2	3	9.16723	9.83	2	3					5.93032	9.83	2	2									590	63.5343	9.72998
Q8Y8D3	Ribose-5-phosphate isomerase A OS=Listeria monocytogenes GN=rpiA - [RPIA_LISMO]	0	2.14198e+08	0	0	0	0	>							4.92919	9.82	2	2																	224	24.7949	5.33838
Q8Y8W8	Lmo0774 protein OS=Listeria monocytogenes GN=lmo0774 - [Q8Y8W8_LISMO]	0	2.20989e+08	0	0	0	4.09525e+07	>		>					5.00351	9.71	2	2													5.2872	9.71	2	2	309	33.4026	5.61768
Q8Y551	Fumarate hydratase class II OS=Listeria monocytogenes GN=fumC - [FUMC_LISMO]	2.50369e+08	0	0	0	0	0				8.43387	7.03	2	3																					455	49.5944	5.71924
Q8Y8V7	Lmo0785 protein OS=Listeria monocytogenes GN=manR - [Q8Y8V7_LISMO]	0	9.04901e+07	0	0	0	2.23033e+07	>		>					6.97258	3.52	2	2													5.19484	3.52	2	2	938	106.395	5.19873
Q8Y7G1	DNA polymerase III polC-type OS=Listeria monocytogenes GN=polC - [DPO3_LISMO]	233985412	1.86056e+08	4.13676e+07	1.83714e+08	1.94868e+07	0	0.795161	4.44102		18.7314	6.16	5	6	20.3559	6.23	5	6	13.0134	4.64	4	5	12.1121	3.25	2	4	9.79925	2.22	2	3					1444	162.629	5.43994
Q8Y6F0	Lmo1737 protein OS=Listeria monocytogenes GN=lmo1737 - [Q8Y6F0_LISMO]	4.65429e+08	6.79758e+08	1.45486e+08	0	8.91423e+07	2.49189e+08	1.4605		2.79541	10.2292	6.79	2	3	6.4083	6.79	2	2	13.8759	6.79	2	4					16.9792	9.24	3	6	5.7275	6.79	2	2	368	40.4167	5.14795
Q8YAV6	DNA gyrase subunit A OS=Listeria monocytogenes GN=gyrA - [Q8YAV6_LISMO]	0	0	4.78102e+07	2.75573e+09	0	0		57.6389										4.91981	4.63	2	2	4.48971	4.63	2	2									842	94.684	5.41455
Q8Y6G5	Lmo1722 protein OS=Listeria monocytogenes GN=lmo1722 - [Q8Y6G5_LISMO]	0	0	0	0	2.51848e+07	0																				5.35716	6.35	2	2					441	50.0849	9.70068
Q8Y7J8	ATP-dependent protease ATPase subunit HslU OS=Listeria monocytogenes GN=hslU - [HSLU_LISMO]	0	150597422	0	0	0	3.21941e+07	>		>					5.03224	6.18	2	2													4.76861	6.18	2	2	469	53.193	5.71924
Q8Y8C6	Lmo0982 protein OS=Listeria monocytogenes GN=lmo0982 - [Q8Y8C6_LISMO]	0	2.89713e+08	0	0	6.46695e+07	8.11623e+07	>		1.25503					5.85619	8.57	2	2									6.08182	8.57	2	2	5.97375	8.57	2	2	350	38.6497	6.06201
Q8Y7N6	Ribonuclease PH OS=Listeria monocytogenes GN=rph - [RNPH_LISMO]	416948038	0	0	0	0	0				4.68279	4.44	2	2																					248	26.6527	4.94482
Q8YAV0	AA3-600 quinol oxidase subunit II OS=Listeria monocytogenes GN=qoxA - [Q8YAV0_LISMO]	1.98359e+08	0	0	0	0	0				9.08706	7.88	2	3																					368	41.5582	6.46826
Q8Y3R7	Lmo2766 protein OS=Listeria monocytogenes GN=lmo2766 - [Q8Y3R7_LISMO]	0	3.44473e+07	0	0	0	0	>							8.37922	7.79	2	3																	244	28.3242	5.69385
Q8Y510	ATP-dependent helicase/deoxyribonuclease subunit B OS=Listeria monocytogenes GN=addB - [ADDB_LISMO]	0	3.32172e+09	0	9.81194e+07	0	0	>	>						9.95929	6.14	3	3					6.33778	2.68	2	2									1157	132.519	5.66846
Q8Y665	Carbamoyl-phosphate synthase large chain OS=Listeria monocytogenes GN=carB - [CARB_LISMO]	0	1.00716e+09	0	373865460	0	0	>	>						4.37036	2.8	2	2					5.07327	2.43	2	2									1070	117.702	4.86865
Q8Y6S7	Lmo1606 protein OS=Listeria monocytogenes GN=lmo1606 - [Q8Y6S7_LISMO]	0	249411144	0	0	0	0	>							4.84935	3.45	2	2																	783	87.7393	5.42725
Q8Y703	Lmo1527 protein OS=Listeria monocytogenes GN=lmo1527 - [Q8Y703_LISMO]	0	0	0	0	1.20633e+07	0																				6.18597	3.98	2	2					754	82.5625	9.34912
Q8Y6C2	Amidophosphoribosyltransferase OS=Listeria monocytogenes GN=purF - [Q8Y6C2_LISMO]	1.5143e+08	1.55848e+08	0	0	0	0	1.02918			5.46078	5.89	2	2	5.05958	5.89	2	2																	475	52.1695	5.40186
Q8Y629	Lmo1871 protein OS=Listeria monocytogenes GN=lmo1871 - [Q8Y629_LISMO]	0	0	0	6.91346e+08	0	0		>														4.5827	5.77	2	2									503	54.5858	5.04639
Q8Y9B6	C-terminal domain similar to glycerophosphoryl diester phosphodiesterase OS=Listeria monocytogenes GN=lmo0616 - [Q8Y9B6_LISMO]	676583719	0	0	0	0	0				6.72791	5.32	2	3																					583	66.5085	9.18799
Q8Y7A3	DNA translocase ftsK OS=Listeria monocytogenes GN=ftsK - [FTSK_LISMO]	0	2.11286e+08	0	0	0	6.43968e+07	>		>					9.19689	5.02	3	3													11.904	4.1	2	3	757	83.4984	7.41553
Q8Y8B1	ATP-dependent protease OS=Listeria monocytogenes GN=clpE - [Q8Y8B1_LISMO]	0	0	0	8.49674e+08	0	5.66886e+08		>	>													6.98403	3.45	2	3					5.32564	3.04	2	2	724	80.1363	5.21143
Q8Y705	Lmo1525 protein OS=Listeria monocytogenes GN=lmo1525 - [Q8Y705_LISMO]	0	0	0	2.68458e+07	0	0		>														5.35038	4.47	2	2									783	87.6363	5.0083
Q8Y6V7	DnaE protein OS=Listeria monocytogenes GN=dnaE - [Q8Y6V7_LISMO]	0	56492843	0	0	0	0	>							6.91252	2.98	2	2																	1108	124.981	6.12549
Q8Y7B5	Dihydrolipoyl dehydrogenase OS=Listeria monocytogenes GN=lmo1371 - [Q8Y7B5_LISMO]	3.68322e+07	0	0	0	0	0				4.8972	3.58	2	2																					475	50.9414	5.63037

## Sheet: S12
Accession	Description	DMSO (1) A5: Area	S12 (1) D5: Area	DMSO (2) E5: Area	S12 (2) H5: Area	DMSO (3) I5: Area	S12 (3) L5: Area	S10/DMSO (1)	S10/DMSO (2)	S10/DMSO (3)	Score A2	Coverage A2	# Peptides A2	# PSM A2	Score D2	Coverage D2	# Peptides D2	# PSM D2	Score E2	Coverage E2	# Peptides E2	# PSM E2	Score H2	Coverage H2	# Peptides H2	# PSM H2	Score I2	Coverage I2	# Peptides I2	# PSM I2	Score L2	Coverage L2	# Peptides L2	# PSM L2	# AAs	MW [kDa]	calc. pI
Q8Y422	Elongation factor Tu OS=Listeria monocytogenes GN=tuf - [EFTU_LISMO]	5.59494e+10	5.24259e+10	1.2669e+10	4.05857e+09	3.08511e+09	2.50803e+10	0.937023	0.320355	8.12946	536.904	70.38	28	171	1172.45	70.38	30	330	523.526	64.56	23	168	771.026	71.65	28	236	659.518	70.38	26	208	537.761	57.97	25	173	395	43.3148	4.91943
Q8Y4M2	Lmo2415 protein OS=Listeria monocytogenes GN=lmo2415 - [Q8Y4M2_LISMO]	7.26953e+09	8.47603e+09	1.90187e+09	2.21114e+09	3.10859e+08	3.08427e+09	1.16597	1.16261	9.92179	130.5	64.37	12	36	252.905	74.33	16	70	156.266	47.89	10	43	160.788	60.15	11	42	103.166	53.64	9	26	263.479	68.58	12	64	261	29.1357	4.62744
Q8Y6M7	Elongation factor Ts OS=Listeria monocytogenes GN=tsf - [EFTS_LISMO]	14423908991	1.62441e+10	4.26239e+09	5.47466e+09	2.28071e+09	9.61978e+09	1.12619	1.28441	4.21788	194.365	83.33	24	60	244.535	82.99	23	72	290.084	75.17	21	87	296.759	78.23	23	87	175.808	77.89	22	51	240.542	82.99	24	74	294	32.6177	5.19873
Q8Y6M6	30S ribosomal protein S2 OS=Listeria monocytogenes GN=rpsB - [RS2_LISMO]	2.98109e+09	5.39586e+09	1.55421e+09	1.63292e+09	1.86144e+08	2.51457e+09	1.81003	1.05064	13.5087	37.8811	65.06	11	13	70.187	59.84	17	26	35.5684	49	10	13	82.7991	55.42	10	29	35.3842	42.57	6	10	47.2672	49	9	16	249	28.3569	6.18896
Q8Y859	Lmo1059 protein OS=Listeria monocytogenes GN=lmo1059 - [Q8Y859_LISMO]	7.50842e+08	8.63502e+10	5.25506e+07	2.61833e+10	8.54873e+07	51318632414	115.004	498.249	600.307	18.3329	48.3	4	5	535.139	78.98	15	126	18.874	35.23	3	5	942.391	81.82	15	225	18.4261	48.3	4	5	673.454	81.82	16	166	176	19.9151	4.89404
Q9RQI6	ATP-dependent Clp protease proteolytic subunit OS=Listeria monocytogenes GN=clpP - [CLPP_LISMO]	0	9.42115e+08	0	8.86251e+07	0	2.56521e+08	>	>	>					39.9442	54.55	6	10					16.1013	18.18	2	5					28.2957	34.34	3	7	198	21.605	5.10986
Q8Y5G2	Pyridoxal biosynthesis lyase pdxS OS=Listeria monocytogenes GN=pdxS - [PDXS_LISMO]	1.50176e+09	2.93438e+09	5.50592e+08	696011970	4.87958e+08	1.12537e+09	1.95396	1.26412	2.30628	25.5748	42.37	8	8	57.2308	54.24	15	18	27.5755	24.07	4	8	46.6432	42.71	8	13	32.0952	34.24	8	10	35.4635	56.95	9	10	295	31.7002	5.47803
Q8Y4I1	Gap protein OS=Listeria monocytogenes GN=gap - [Q8Y4I1_LISMO]	1.07713e+10	1.05906e+10	4.18044e+09	3.17498e+09	2.1634e+09	5.63161e+09	0.983223	0.759486	2.60313	138.967	65.77	17	31	145.099	65.48	17	33	192.946	61.01	18	45	191.371	63.39	15	43	144.781	60.71	16	33	141.875	68.15	17	31	336	36.2636	5.36377
Q8Y683	Lmo1814 protein OS=Listeria monocytogenes GN=lmo1814 - [Q8Y683_LISMO]	5.26377e+08	997546199	1.10444e+08	1.75396e+08	8.79206e+07	4.32272e+08	1.89512	1.5881	4.91662	23.7847	20.83	6	7	68.188	36.78	14	20	18.5547	19.57	5	6	42.1237	28.26	11	13	12.0712	13.41	4	4	54.7404	32.25	11	15	552	59.3169	4.62744
Q8Y863	PdhC protein OS=Listeria monocytogenes GN=pdhC - [Q8Y863_LISMO]	9.33023e+09	8.32082e+09	3.70055e+09	3.64529e+09	1.70556e+09	4.12761e+09	0.891813	0.985067	2.42009	151.787	69.12	23	42	243.684	73.35	25	67	180.939	69.67	22	48	229.449	73.35	23	62	146.969	71.32	23	40	116.208	72.98	21	31	544	58.1586	4.85596
Q8YAR9	30S ribosomal protein S6 OS=Listeria monocytogenes GN=rpsF - [RS6_LISMO]	0	9.25565e+08	0	4.05778e+08	0	4.62714e+08	>	>	>					21.048	57.73	5	6					19.81	40.21	3	5					14.37	40.21	3	4	97	11.4999	5.18604
Q926Y9	Inosine-5'-monophosphate dehydrogenase OS=Listeria monocytogenes GN=guaB - [Q926Y9_LISMO]	1.26251e+10	1.28562e+10	4.20288e+09	3.72851e+09	2.08522e+09	6.28927e+09	1.01831	0.887133	3.01613	136.516	66.39	25	40	188.928	70.29	26	59	146.568	56.76	19	42	330.41	68.03	25	97	89.2395	56.76	21	28	244.692	69.67	25	76	488	52.5226	6.49365
Q8Y5W9	Glycerol-3-phosphate dehydrogenase [NAD(P)+] OS=Listeria monocytogenes GN=gpsA - [GPDA_LISMO]	8.18373e+08	3.37703e+09	2.79873e+08	7.44046e+08	1.47475e+08	2.19469e+09	4.12652	2.65851	14.8818	37.8549	52.07	10	13	125.267	66.86	17	39	34.5491	40.83	8	12	93.251	53.25	12	27	20.2252	23.67	6	7	102.372	60.65	13	32	338	36.474	5.46533
Q9S5A4	Chaperone protein DnaK OS=Listeria monocytogenes GN=dnaK - [DNAK_LISMO]	1.11999e+09	5.95256e+09	2.18481e+08	2.90645e+09	1.95756e+08	2.63719e+09	5.31483	13.303	13.4718	50.9807	37.03	14	15	318.443	67.54	31	85	62.8344	35.24	13	20	347.951	66.39	25	92	54.3713	34.26	11	16	378.357	69.49	27	98	613	66.1038	4.69092
Q8Y4I2	Phosphoglycerate kinase OS=Listeria monocytogenes GN=pgk - [PGK_LISMO]	3.06598e+09	4.93319e+09	2.12635e+09	1.06241e+09	6.61378e+08	2.24205e+09	1.60901	0.499641	3.38997	52.8502	49.24	11	15	60.9146	61.11	15	18	92.318	51.26	12	26	109.156	61.62	15	30	65.7478	43.94	9	18	81.4453	57.83	14	25	396	42.078	5.09717
Q8Y4R1	Lmo2373 protein OS=Listeria monocytogenes GN=lmo2373 - [Q8Y4R1_LISMO]	2817456792	3.08732e+09	1.5183e+09	3.77234e+08	1.19288e+09	1.9786e+09	1.09578	0.248459	1.65868	10.5815	40.38	3	3	22.4467	75	5	6	18.3616	40.38	3	5	23.3638	40.38	4	7	10.6709	40.38	3	3	29.0413	75	5	8	104	11.1828	4.84326
Q8Y421	Elongation factor G OS=Listeria monocytogenes GN=fusA - [EFG_LISMO]	1.711e+10	1.41593e+10	3.31007e+09	3.30539e+09	1.62021e+09	5.43591e+09	0.827547	0.998587	3.35507	510.452	57.27	30	135	666.234	63.6	37	173	484.542	53.24	26	130	440.72	53.81	26	119	413.967	50.22	26	111	480.686	53.81	27	128	695	76.8015	4.94482
Q8Y9H5	Lmo0553 protein OS=Listeria monocytogenes GN=lmo0553 - [Q8Y9H5_LISMO]	6.44846e+08	1.5732e+09	6.50594e+07	4.48408e+08	1.61488e+08	7.82291e+08	2.43966	6.89228	4.84427	21.5415	31.75	4	7	36.5915	55.45	7	12	10.0987	25.59	3	4	31.1777	51.18	6	10	12.4106	14.69	2	4	38.7119	45.02	5	11	211	23.5466	7.48877
Q8Y4I3	Triosephosphate isomerase 1 OS=Listeria monocytogenes GN=tpiA1 - [TPIS1_LISMO]	6.08333e+09	4.38659e+09	9.23013e+08	1.33521e+09	1.47155e+08	1.43159e+09	0.721085	1.44658	9.72845	41.6185	40.64	6	12	34.9584	31.08	6	10	22.8912	40.64	6	7	46.4411	30.68	5	13	23.0447	26.29	4	7	24.4721	30.68	5	7	251	26.8615	4.83057
Q8Y689	FabD protein OS=Listeria monocytogenes GN=fabD - [Q8Y689_LISMO]	854420910	1.30225e+09	2.84726e+08	2.92487e+08	1.88222e+08	5.78099e+08	1.52414	1.02726	3.07137	41.655	60.38	10	12	59.5519	66.77	12	16	34.2206	45.05	8	11	38.3132	38.02	8	10	18.3354	19.17	5	6	58.1493	58.47	12	19	313	32.9133	4.85596
Q9S389	D-alanine--poly(phosphoribitol) ligase subunit 2 OS=Listeria monocytogenes GN=dltC - [DLTC_LISMO]	0	8.60223e+07	0	6.25766e+07	0	4.16116e+07	>	>	>					19.4495	71.79	2	5					11.0073	71.79	2	3					15.1642	71.79	2	4	78	9.00456	3.95459
Q8Y971	ThiD protein OS=Listeria monocytogenes GN=thiD - [Q8Y971_LISMO]	2.33658e+09	2.82232e+09	8.27912e+08	8.75398e+08	5.32075e+08	1.16823e+09	1.20789	1.05736	2.19562	24.1992	45.76	8	8	23.8681	32.47	7	8	23.854	32.47	6	8	25.5527	33.21	6	8	14.7313	21.4	4	5	27.644	31.73	6	8	271	28.801	5.40186
Q8Y5T8	Uncharacterized protein Lmo1967 OS=Listeria monocytogenes GN=lmo1967 - [Y1967_LISMO]	0	2.9075e+09	0	1.62512e+09	0	1362004814	>	>	>					112.727	57.64	18	33					143.462	66.17	15	40					105.822	64.91	13	31	399	45.4636	5.42725
Q8Y8D5	Enoyl-[acyl-carrier-protein] reductase [NADH] OS=Listeria monocytogenes GN=lmo0970 - [Q8Y8D5_LISMO]	3.28611e+09	1.60994e+09	5.50542e+08	5.51105e+08	3.06214e+08	799895611	0.489922	1.00102	2.61221	39.7685	51.53	9	12	37.2554	51.15	8	11	30.4093	38.93	8	10	27.0445	42.75	7	8	32.1219	29.39	6	8	29.7206	55.34	8	9	262	28.2766	5.66846
Q928M6	Lmo2411 protein OS=Listeria monocytogenes GN=lmo2411 - [Q928M6_LISMO]	8.93287e+08	3.36151e+09	2.27826e+08	3.45957e+08	1.05602e+08	5.84684e+08	3.76308	1.51852	5.5367	34.4876	32.54	9	11	66.7464	45.91	16	24	37.5992	25.22	8	10	41.02	35.56	11	13	28.4095	29.31	8	9	35.4878	32.54	10	13	464	52.4829	4.91943
P0A4L3	Thioredoxin OS=Listeria monocytogenes GN=trxA - [THIO_LISMO]	2.06249e+09	4.84047e+10	7.23527e+08	8.37306e+09	3.79439e+08	2.28049e+10	23.4691	11.5726	60.1018	38.2368	49.51	8	10	158.942	68.93	11	45	44.8036	51.46	8	12	621.737	68.93	10	181	32.9296	49.51	6	9	416.623	68.93	10	119	103	11.6128	4.33545
Q8Y865	PdhA protein OS=Listeria monocytogenes GN=pdhA - [Q8Y865_LISMO]	1.51633e+09	2.13939e+09	5.50088e+08	7.38715e+08	2.60179e+08	9.41976e+08	1.4109	1.3429	3.62049	28.4948	31.81	7	8	50.2412	54.99	12	14	21.1551	33.15	6	6	21.74	25.34	5	6	15.7689	22.37	4	4	18.2732	24.53	5	5	371	41.2414	6.46826
Q8Y7B4	Lmo1372 protein OS=Listeria monocytogenes GN=lmo1372 - [Q8Y7B4_LISMO]	0	5.51895e+09	0	1.52895e+09	0	1.59515e+09	>	>	>					93.3457	67.37	12	26					61.198	45.62	7	17					69.5409	45.62	7	17	331	36.3269	4.90674
Q8Y4C5	Mbl protein OS=Listeria monocytogenes GN=mbl - [Q8Y4C5_LISMO]	6.21201e+08	5.21437e+08	1.59226e+08	1.57265e+08	7.11957e+07	2.53245e+08	0.839401	0.987686	3.55702	50.6243	59.52	9	14	45.864	51.36	8	12	29.5203	25.38	4	7	25.9655	25.68	4	7	33.8937	25.38	4	8	50.7829	53.47	8	13	331	35.6139	5.61768
Q927L9	50S ribosomal protein L5 OS=Listeria monocytogenes GN=rplE - [RL5_LISMO]	9.90024e+08	2464307903	4.26214e+08	4.63903e+08	2.52387e+08	1.03375e+09	2.48914	1.08843	4.09588	18.3116	45.25	5	6	33.063	62.57	8	11	8.58168	30.17	3	3	27.7214	53.07	7	9	11.6609	30.17	3	4	28.6855	57.54	9	10	179	19.9826	9.0415
Q8Y498	FbaA protein OS=Listeria monocytogenes GN=fbaA - [Q8Y498_LISMO]	4.08498e+10	3.14309e+10	1.08661e+10	9.83703e+09	8.83998e+09	1.76281e+10	0.769425	0.905299	1.99413	94.2767	65.49	13	29	78.811	55.63	12	25	219.776	55.63	11	68	158.261	55.63	11	48	118.192	53.87	11	36	111.472	55.63	11	34	284	30.0484	5.37646
Q8Y6R4	Lmo1620 protein OS=Listeria monocytogenes GN=lmo1620 - [Q8Y6R4_LISMO]	3.2135e+09	2.09363e+09	5.5301e+08	4.30379e+08	4.33374e+08	1.13239e+09	0.65151	0.778249	2.61296	77.9067	51.49	14	21	76.8433	49.79	13	21	72.8552	44.68	11	20	48.6082	33.83	10	14	55.2621	39.79	10	15	63.834	41.49	11	17	470	51.8171	5.07178
Q8Y701	Lmo1529 protein OS=Listeria monocytogenes GN=lmo1529 - [Q8Y701_LISMO]	3.92875e+08	3.13782e+08	1.23036e+08	2.44197e+07	3.4851e+07	9.83891e+07	0.79868	0.198476	2.82314	11.4509	55.05	3	3	11.1174	52.29	3	3	9.77931	42.2	2	2	13.993	42.2	2	3	19.1985	42.2	2	4	8.98577	42.2	2	2	109	11.9504	6.06201
Q8Y7B0	6-phosphogluconate dehydrogenase, decarboxylating OS=Listeria monocytogenes GN=lmo1376 - [Q8Y7B0_LISMO]	2.18757e+09	3.40502e+09	4.03717e+08	8.43587e+08	3.92481e+08	1.11937e+09	1.55653	2.08955	2.85203	51.6761	35.17	10	17	80.5614	42.8	14	24	54.2951	23.31	5	18	99.372	37.5	10	30	36.2582	23.52	6	14	78.8927	34.11	9	22	472	52.3827	5.21143
Q8Y8N0	Lmo0866 protein OS=Listeria monocytogenes GN=lmo0866 - [Q8Y8N0_LISMO]	5.38323e+09	3.21415e+09	1.89505e+09	1.49354e+09	1.24568e+09	1.27535e+09	0.597067	0.788129	1.02382	96.598	54.23	23	29	102.828	58.08	28	32	96.9863	45.96	22	30	79.1606	36.54	16	25	106.955	50.58	21	32	59.7387	34.23	14	18	520	57.2739	9.39307
Q8Y7L0	Trigger factor OS=Listeria monocytogenes GN=tig - [TIG_LISMO]	3.23614e+08	1.02225e+10	8.80457e+07	3.05241e+09	5.34109e+07	3.5565e+09	31.5887	34.6685	66.5875	27.013	21.78	5	8	146.353	63.7	25	42	9.39098	11.71	3	3	123.383	44.5	18	35	19.644	21.78	5	6	133.172	55.27	20	39	427	47.8242	4.56396
Q8Y6V1	Lmo1580 protein OS=Listeria monocytogenes GN=lmo1580 - [Q8Y6V1_LISMO]	1.61186e+09	2.19476e+09	4.08035e+08	5.1419e+08	2.07068e+08	7.84685e+08	1.36164	1.26016	3.78951	34.4112	55.84	6	9	39.0608	63.64	9	11	65.1457	55.84	7	16	48.4631	55.84	8	13	44.0213	55.84	7	11	45.779	55.84	7	12	154	16.8566	5.09717
Q8Y9J4	UPF0237 protein lmo0533 OS=Listeria monocytogenes GN=lmo0533 - [Y533_LISMO]	3.40757e+08	3.39113e+08	4.09187e+07	5.20353e+07	2.7609e+07	1.03061e+08	0.995174	1.27167	3.73286	13.0241	51.69	4	4	9.78751	38.2	3	3	9.21049	34.83	3	3	10.0253	34.83	3	3	10.0531	51.69	3	3	10.0376	34.83	3	3	89	9.93606	5.12256
Q8Y846	PycA protein OS=Listeria monocytogenes GN=pycA - [Q8Y846_LISMO]	4.58512e+10	2.31093e+10	1.90897e+10	7.48027e+09	8.39627e+09	7.06124e+09	0.504007	0.391849	0.840998	560.853	58.9	56	171	412.553	60.3	54	127	1344.76	59.77	50	415	545.239	57.5	45	171	1215.35	57.42	49	366	364.35	52.36	39	115	1146	127.969	5.5542
P66042	50S ribosomal protein L10 OS=Listeria monocytogenes GN=rplJ - [RL10_LISMO]	3.4859e+09	2.09594e+09	1.05815e+09	6.65156e+08	2.50547e+08	4.47985e+08	0.601261	0.628599	1.78803	32.046	62.65	5	7	16.446	53.61	4	4	37.2454	62.65	5	9	36.9778	56.63	4	9	24.061	59.64	4	7	32.2582	56.63	5	8	166	17.6824	5.42725
Q8Y7H4	Tkt protein OS=Listeria monocytogenes GN=tkt - [Q8Y7H4_LISMO]	4.685e+09	4284912738	2.18047e+09	1.99351e+09	8.43812e+08	1.89776e+09	0.914603	0.914259	2.24903	177.21	55.57	25	49	150.528	60.54	27	41	139.007	52.41	23	41	120.626	43.52	19	37	96.7167	49.7	22	31	129.115	46.23	22	37	664	71.7812	5.2876
Q8Y6V4	UPF0173 metal-dependent hydrolase lmo1577 OS=Listeria monocytogenes GN=lmo1577 - [Y1577_LISMO]	8.65285e+08	8.89838e+08	1.8733e+08	1.07329e+08	1.43636e+08	2.74558e+08	1.02838	0.57294	1.91148	33.4988	58.33	6	10	16.7693	33.33	4	5	12.589	37.72	4	4	10.8279	21.05	2	3	12.286	17.54	3	4	28.3778	35.96	4	7	228	24.6324	4.98291
P66611	30S ribosomal protein S7 OS=Listeria monocytogenes GN=rpsG - [RS7_LISMO]	8.5156e+07	5.64717e+08	2.57875e+07	1.49117e+08	0	2.51038e+08	6.63156	5.78255	>	18.9622	26.28	2	5	11.4601	45.51	4	4	6.14497	26.28	2	2	14.9039	26.28	2	4					15.7841	40.38	3	5	156	17.8054	10.1694
Q8Y690	FabG protein OS=Listeria monocytogenes GN=fabG - [Q8Y690_LISMO]	992722836	1.45795e+09	6.95254e+08	7.02424e+08	1.57033e+08	587565206	1.46864	1.01031	3.74167	16.0607	35.63	5	5	19.6679	44.13	6	6	18.597	38.06	5	5	28.8469	29.55	4	8	21.4663	28.74	4	5	17.4452	28.74	4	4	247	26.2315	5.51611
O31149	Phosphoenolpyruvate-protein phosphotransferase OS=Listeria monocytogenes GN=ptsI - [PT1_LISMO]	3997476912	7.34494e+09	1.6679e+09	1.82499e+09	5.63756e+08	3.3661e+09	1.83739	1.09418	5.97085	85.0886	36.19	15	23	109.772	45.98	20	29	70.4485	31.47	14	22	109.868	40.38	16	31	61.5153	23.6	13	19	84.3044	37.24	16	23	572	63.1724	4.80518
Q8Y5F0	Lmo2114 protein OS=Listeria monocytogenes GN=lmo2114 - [Q8Y5F0_LISMO]	2.43958e+08	4.62184e+08	1.77619e+08	1.81721e+08	5.99139e+07	1.48462e+08	1.89453	1.02309	2.47793	30.8092	50.98	6	8	38.2831	50.98	7	10	15.2716	35.69	4	4	22.0309	43.14	5	6	17.3921	31.37	3	4	24.0442	54.9	6	7	255	28.2958	5.42725
Q8YA72	Lmo0287 protein OS=Listeria monocytogenes GN=lmo0287 - [Q8YA72_LISMO]	1.20406e+09	1.53265e+09	2.08045e+08	2.23383e+08	1.17438e+08	1.26781e+08	1.2729	1.07372	1.07956	28.0704	36.71	6	9	39.6209	49.37	7	10	14.2397	17.72	4	4	17.324	21.1	4	5	15.8806	26.58	4	5	14.0309	33.33	4	4	237	27.2719	5.05908
Q8Y6D3	Aspartyl/glutamyl-tRNA(Asn/Gln) amidotransferase subunit B OS=Listeria monocytogenes GN=gatB - [GATB_LISMO]	2.53278e+09	2.952e+09	1.15193e+09	3.43724e+08	3.63129e+08	9.72699e+08	1.16552	0.298391	2.67866	76.0457	43.07	15	21	94.3841	53.15	19	27	57.0311	41.81	14	18	70.7303	42.02	13	23	55.658	36.97	13	17	76.7961	56.72	19	24	476	53.2032	5.36377
Q8Y6W1	Pyruvate kinase OS=Listeria monocytogenes GN=pykA - [Q8Y6W1_LISMO]	2.88205e+09	1.81452e+09	5.01174e+08	4.27761e+08	3.33051e+08	7.46602e+08	0.629593	0.853518	2.2417	81.7287	47.69	19	26	65.2821	44.62	16	19	57.3467	34.02	14	17	50.1425	29.91	13	15	62.9854	36.41	14	19	52.0272	29.06	12	17	585	62.559	5.5542
Q8Y4B2	Serine hydroxymethyltransferase OS=Listeria monocytogenes GN=glyA - [GLYA_LISMO]	3.17278e+09	2.34373e+09	1.14153e+09	5.66543e+08	5.04136e+08	1.06957e+09	0.738699	0.496301	2.12159	88.4604	53.27	15	25	69.4782	50.61	15	20	93.4941	53.03	14	27	48.2907	42.37	11	14	65.1179	38.01	10	18	57.6245	42.37	11	17	413	45.0943	5.80811
Q8Y6T3	Catabolite control protein A OS=Listeria monocytogenes GN=ccpA - [Q8Y6T3_LISMO]	0	4.16888e+08	0	7.10428e+07	0	1.48754e+08	>	>	>					44.9279	38.81	7	12					24.7603	30.75	5	8					28.7658	33.73	6	9	335	36.9603	5.40186
Q8Y7Y1	ATP-dependent Clp protease proteolytic subunit 1 OS=Listeria monocytogenes GN=clpP1 - [Q8Y7Y1_LISMO]	0	2.61351e+08	0	2.2197e+08	0	1.19167e+08	>	>	>					13.9409	23.68	3	4					8.79448	25.26	2	2					9.76519	26.32	3	3	190	21.334	5.05908
Q8Y573	3-oxoacyl-[acyl-carrier-protein] synthase 3 OS=Listeria monocytogenes GN=fabH - [FABH_LISMO]	0	1.28702e+09	0	5.86382e+08	0	4.74787e+08	>	>	>					38.5047	40.38	8	12					30.3968	45.19	6	10					23.6712	42.31	5	7	312	33.9495	5.21143
Q8Y8V6	FMN-dependent NADH-azoreductase 2 OS=Listeria monocytogenes GN=azoR2 - [AZOR2_LISMO]	0	4.68315e+08	0	200236715	0	262337543	>	>	>					29.2903	59.72	7	9					8.36097	36.02	3	3					6.79426	18.96	2	2	211	23.0811	5.40186
Q8YAJ0	Lmo0135 protein OS=Listeria monocytogenes GN=lmo0135 - [Q8YAJ0_LISMO]	2.04949e+08	6.46027e+08	52149800	2.05862e+08	0	2.77207e+08	3.15214	3.94752	>	18.1814	15.46	4	5	39.769	36.45	10	12	6.90155	7.25	2	2	22.8647	24.24	6	7					22.6435	22.71	7	7	524	58.2506	5.19873
Q8Y8G1	DNA protection during starvation protein OS=Listeria monocytogenes GN=dps - [DPS_LISMO]	7.36913e+08	660306753	1.38022e+08	3.3697e+08	1.03899e+08	0	0.896044	2.44141		9.00933	26.92	3	3	11.2494	27.56	3	4	8.16288	35.9	3	3	7.89609	16.03	2	3	8.39342	26.92	3	3					156	18.0359	4.93213
Q8Y7K1	Methylenetetrahydrofolate--tRNA-(uracil-5-)-methyltransferase TrmFO OS=Listeria monocytogenes GN=trmFO - [TRMFO_LISMO]	7.28888e+08	9.15508e+08	1.21516e+08	1.90407e+08	8.82096e+07	2.3243e+08	1.25603	1.56693	2.63497	39.654	29.49	6	9	70.3355	46.31	11	17	11.9135	15.44	3	3	39.7165	23.27	6	10	20.0091	22.35	6	7	50.0625	26.27	6	12	434	47.8685	5.46533
Q8Y3L1	Lmo2824 protein OS=Listeria monocytogenes GN=lmo2824 - [Q8Y3L1_LISMO]	8.8475e+08	1.11165e+09	3.99903e+08	3.72145e+08	1.66708e+08	3.98045e+08	1.25645	0.930588	2.38769	58.0483	50.63	14	18	60.758	51.14	15	19	50.5292	45.06	11	15	45.1099	45.32	11	14	28.1653	29.62	7	9	43.1888	47.85	11	14	395	43.1664	5.14795
Q8Y6V0	Acetate kinase 1 OS=Listeria monocytogenes GN=ackA1 - [ACKA1_LISMO]	4.27603e+09	2.65076e+09	1069230876	9.75765e+08	3.80006e+08	8.64465e+08	0.61991	0.912586	2.27487	68.9672	52.39	16	23	88.9434	55.16	18	26	63.8203	39.55	10	21	55.6336	42.57	11	16	45.6408	25.44	7	13	51.9231	39.55	10	14	397	43.8216	5.50342
Q8Y850	Lmo1068 protein OS=Listeria monocytogenes GN=lmo1068 - [Q8Y850_LISMO]	0	1.15162e+08	0	7.78289e+07	0	0	>	>						9.537	19.93	3	3					10.9099	22.73	3	3									286	30.7683	6.15088
Q8Y7F6	Translation initiation factor IF-2 OS=Listeria monocytogenes GN=infB - [IF2_LISMO]	1.19565e+09	2.05647e+09	8.01288e+08	7.9215e+08	1.93568e+08	8.18402e+08	1.71995	0.988596	4.22797	84.9262	46.73	20	26	147.421	51.35	26	44	79.9117	30.3	15	24	70.1015	30.94	14	22	78.8623	41.72	18	25	96.2386	36.46	18	28	779	84.5239	6.3667
Q8Y445	50S ribosomal protein L18 OS=Listeria monocytogenes GN=rplR - [RL18_LISMO]	0	0	0	4.51603e+07	0	0		>														9.16522	31.09	2	2									119	13.088	10.0962
Q8Y3S3	UPF0189 protein lmo2759 OS=Listeria monocytogenes GN=lmo2759 - [Y2759_LISMO]	8.64733e+08	6.78404e+08	1.85821e+08	3.34748e+08	8.49951e+07	3.98994e+08	0.784525	1.80145	4.69431	33.1874	57.95	6	8	40.0505	57.95	6	9	42.3354	46.59	4	9	31.1504	46.59	4	7	20.9541	46.59	4	5	56.7399	57.95	7	13	176	18.9727	4.83057
P66054	50S ribosomal protein L11 OS=Listeria monocytogenes GN=rplK - [RL11_LISMO]	8.26174e+08	2.55448e+09	1.18568e+09	1.12367e+09	4.76192e+08	2.72056e+09	3.09193	0.947703	5.71316	19.2837	45.39	4	5	41.3636	52.48	7	11	31.2154	51.06	5	8	37.3192	46.81	6	10	19.8079	46.1	4	5	35.9835	57.45	7	10	141	14.8509	9.45166
Q8Y4S4	Lmo2358 protein OS=Listeria monocytogenes GN=lmo2358 - [Q8Y4S4_LISMO]	3.04088e+08	4.88831e+08	1.60954e+08	1.7741e+08	7.78392e+07	2.33985e+08	1.60753	1.10224	3.00601	14.8157	31.69	5	5	27.8543	47.74	7	9	14.9901	24.28	4	5	23.8899	42.8	6	7	12.9729	21.4	3	4	17.35	33.74	5	5	243	26.9586	4.80518
Q8Y6L1	MenB protein OS=Listeria monocytogenes GN=menB - [Q8Y6L1_LISMO]	2.51135e+09	8.3451e+09	5.7826e+08	1.91094e+09	2.92681e+08	5.41894e+09	3.32295	3.30464	18.5148	56.3308	50.74	11	16	84.5575	56.99	15	25	46.2509	44.12	8	13	113.176	56.99	14	33	66.1698	49.26	10	19	77.6253	56.99	15	24	272	30.0052	5.30029
Q8Y6Y9	50S ribosomal protein L21 OS=Listeria monocytogenes GN=rplU - [RL21_LISMO]	0	2.60424e+08	0	0	0	0	>							11.2093	47.06	4	4																	102	11.2071	9.56885
Q8YA96	DNA-directed RNA polymerase subunit beta' OS=Listeria monocytogenes GN=rpoC - [RPOC_LISMO]	5.08433e+09	3.01542e+09	1.77643e+09	1.13058e+09	8.19911e+08	1.17774e+09	0.593081	0.636433	1.43642	161.365	41.88	36	53	175.807	44.38	37	56	190.032	32.31	26	60	126.287	27.06	22	41	104.839	31.06	23	34	97.2147	26.06	21	31	1201	134.713	8.32373
Q8Y571	2,3-bisphosphoglycerate-dependent phosphoglycerate mutase OS=Listeria monocytogenes GN=gpmA - [GPMA_LISMO]	0	2.93606e+08	0	1.52206e+08	0	8.71672e+07	>	>	>					8.31919	22.27	3	3					6.32827	17.03	2	2					7.01576	22.71	2	2	229	26.4007	5.87158
Q927X8	DegU OS=Listeria monocytogenes GN=degU - [Q927X8_LISMO]	7.58793e+08	1286408044	2.5859e+08	3.73087e+08	1.6115e+08	5.24198e+08	1.69533	1.44277	3.25285	20.7724	28.51	5	7	30.5897	41.23	6	9	26.1582	35.09	6	8	22.9117	28.51	5	7	24.7639	28.51	5	8	16.2705	28.51	4	5	228	25.7996	6.80029
Q8Y722	Alanyl-tRNA synthetase OS=Listeria monocytogenes GN=alaS - [SYA_LISMO]	1.94005e+09	2.48701e+09	6.84171e+08	7.22505e+08	4.6262e+08	9.57807e+08	1.28193	1.05603	2.0704	69.7212	30.49	18	21	86.8008	35.72	22	26	82.0221	24.57	16	25	83.2118	26.85	17	24	81.4353	26.17	16	24	90.8037	31.29	20	28	879	97.9161	5.22412
Q927L2	50S ribosomal protein L22 OS=Listeria monocytogenes GN=rplV - [RL22_LISMO]	1.2541e+08	1.11145e+08	0	4.82231e+07	0	1.03956e+08	0.886254	>	>	5.20799	21.19	2	2	5.63543	21.19	2	2					4.89324	21.19	2	2					8.13591	21.19	2	3	118	12.8661	9.99365
Q8Y458	50S ribosomal protein L13 OS=Listeria monocytogenes GN=rplM - [RL13_LISMO]	0	2.68016e+08	0	37802999	0	0	>	>						17.51	51.03	4	6					5.11601	21.38	2	2									145	16.1895	9.78857
Q8YAC3	Cysteine synthase OS=Listeria monocytogenes GN=cysK - [Q8YAC3_LISMO]	2.29146e+08	9.46922e+08	6.49161e+07	1.45371e+08	0	3.33801e+08	4.13239	2.23937	>	11.4053	21.43	3	3	23.4675	42.53	7	7	10.3465	21.43	3	3	25.6248	33.12	6	7					19.8803	33.44	5	5	308	32.1978	5.42725
P64074	Enolase OS=Listeria monocytogenes GN=eno - [ENO_LISMO]	3.11018e+08	1.25196e+09	1.68181e+08	5.25583e+08	6.96079e+07	4.93965e+08	4.02537	3.12509	7.0964	17.4689	24.19	5	5	50.0172	48.14	12	14	21.0441	21.86	5	6	44.5953	43.26	10	12	10.753	10.23	3	3	39.4201	50.93	11	11	430	46.4436	4.79248
Q9AGE6	60 kDa chaperonin OS=Listeria monocytogenes GN=groL - [CH60_LISMO]	3.44763e+08	2.72522e+09	7.94171e+07	6.98515e+08	1.60173e+07	1.31143e+09	7.90462	8.79552	81.8755	38.6257	18.63	4	10	110.696	53.51	18	30	26.7626	18.08	4	8	95.8154	43.91	14	28	16.6084	18.63	4	5	138.827	46.13	14	37	542	57.3319	4.79248
Q8Y6Y3	MreB protein OS=Listeria monocytogenes GN=mreB - [Q8Y6Y3_LISMO]	729722893	2.09317e+09	2.73595e+08	471508455	1.78399e+08	5.91588e+08	2.86844	1.72338	3.3161	23.6453	28.19	6	7	57.7314	51.34	18	18	22.9775	23.15	5	7	23.3631	29.97	7	7	22.3639	24.63	5	6	26.8958	24.93	7	8	337	35.4806	5.2876
Q9LAT4	ATPase OppD OS=Listeria monocytogenes GN=oppD - [Q9LAT4_LISMO]	7.40432e+08	9.28741e+08	2.9217e+08	2.70671e+08	9.3571e+07	3.27721e+08	1.25432	0.926416	3.50238	51.7493	42.18	10	15	65.3375	49.72	11	18	34.8467	38.83	9	11	42.4791	38.27	8	12	29.3105	28.49	7	9	53.8342	47.21	10	15	358	39.6876	5.99854
Q8YAB6	Endopeptidase Clp ATP-binding chain C OS=Listeria monocytogenes GN=clpC - [Q8YAB6_LISMO]	1.99363e+09	3079507445	5.38734e+08	1.11809e+09	2.03784e+08	1.95689e+09	1.54467	2.0754	9.60274	55.1575	24.15	13	17	106.303	42.2	28	36	97.4238	28.9	17	33	110.705	38.29	24	35	63.5073	30.12	16	21	104.538	37.32	23	33	820	91.1094	7.48877
Q8Y774	Lmo1423 protein OS=Listeria monocytogenes GN=lmo1423 - [Q8Y774_LISMO]	1620535533	2.61401e+09	4.88422e+08	4.52074e+08	3.17256e+08	8.29478e+08	1.61305	0.925582	2.61454	23.688	25	5	6	32.4858	34.06	8	9	27.1752	30.07	6	8	34.8152	34.06	7	9	23.1081	30.07	6	6	39.8575	37.32	9	11	276	32.2089	7.59131
P60426	50S ribosomal protein L2 OS=Listeria monocytogenes GN=rplB - [RL2_LISMO]	1.76014e+09	1.67311e+09	4.0519e+08	2.92444e+08	1.41663e+08	6.00927e+08	0.950558	0.721746	4.24196	29.4449	30.32	5	10	40.0818	48.01	8	13	23.8262	30.32	4	8	20.6932	22.02	3	7	26.7511	30.32	5	9	18.1286	29.96	4	6	277	30.4864	10.5356
Q8Y7J2	Lmo1285 protein OS=Listeria monocytogenes GN=lmo1285 - [Q8Y7J2_LISMO]	0	3.96015e+08	0	0	0	2.35812e+08	>		>					15.5535	42.96	4	5													5.14001	31.11	2	2	135	15.4358	4.85596
Q8Y444	50S ribosomal protein L6 OS=Listeria monocytogenes GN=rplF - [RL6_LISMO]	6.70719e+08	7.78767e+08	5.14155e+07	2.7701e+08	0	3.11994e+08	1.16109	5.38768	>	13.9811	39.89	5	5	20.059	53.93	6	6	7.1473	24.16	3	3	10.3387	28.09	3	4					10.542	25.28	3	3	178	19.3885	9.74463
Q8Y8E8	Lmo0956 protein OS=Listeria monocytogenes GN=lmo0956 - [Q8Y8E8_LISMO]	2218512800	1.72061e+09	7.4365e+08	5.68138e+08	2.92408e+08	6.55809e+08	0.775568	0.763986	2.24279	49.4739	41.38	11	14	44.9756	48.28	11	14	45.6409	42.71	10	13	45.8824	41.38	11	14	29.9119	30.24	8	9	47.6724	41.38	10	13	377	41.3877	5.71924
Q8YAF2	Methionyl-tRNA synthetase OS=Listeria monocytogenes GN=metG - [SYM_LISMO]	8.66492e+08	7.30351e+08	1.84922e+08	3.20377e+08	1.06412e+08	4.93863e+08	0.842882	1.7325	4.64104	26.6936	12.2	6	8	57.6078	25.45	11	17	11.905	7.68	3	4	30.3544	10.09	5	8	15.7843	9.94	4	5	36.7474	19.73	9	11	664	75.6036	5.07178
Q8Y6X2	Threonyl-tRNA synthetase OS=Listeria monocytogenes GN=thrS - [SYT_LISMO]	2.53011e+09	2.37319e+09	1.26491e+09	7.69104e+08	6.18987e+08	8.83352e+08	0.937977	0.608029	1.42709	57.9724	39.38	15	17	86.363	42.97	18	25	58.3219	27.03	11	18	54.8184	27.03	10	17	53.513	26.72	10	16	57.3147	27.03	10	17	640	73.1942	5.35107
Q8Y495	CTP synthase OS=Listeria monocytogenes GN=pyrG - [PYRG_LISMO]	2.2191e+09	2.85242e+09	6.07188e+08	4.83651e+08	4.83425e+08	7.52544e+08	1.28539	0.796543	1.55669	60.5861	37.59	14	18	92.6031	49.81	19	26	46.4527	33.83	8	14	79.0314	35.53	10	21	45.5884	34.4	10	13	46.5735	37.41	9	12	532	59.5298	5.8335
Q8Y674	Lmo1825 protein OS=Listeria monocytogenes GN=lmo1825 - [Q8Y674_LISMO]	246982821	614641088	5.69691e+07	8.52403e+07	3.5869e+07	2.15454e+08	2.4886	1.49625	6.00668	4.57498	6.27	2	2	24.4332	29.57	7	9	7.6024	6.27	2	3	10.1457	15.04	4	4	5.53609	6.27	2	2	5.67636	6.27	2	2	399	43.3385	6.55127
Q8Y574	3-oxoacyl-[acyl-carrier-protein] synthase 2 OS=Listeria monocytogenes GN=lmo2201 - [Q8Y574_LISMO]	5.77823e+09	4.69481e+09	8.41205e+08	1.03586e+09	1.01515e+09	2.21648e+09	0.812499	1.2314	2.18341	60.69	43.58	8	17	64.1781	36.32	9	16	54.2115	38.5	7	15	32.3885	35.84	7	9	56.1984	43.58	8	16	47.8373	43.58	8	13	413	44.2521	5.43994
O85046	D-alanine aminotransferase OS=Listeria monocytogenes GN=dat - [DAAA_LISMO]	3.68959e+08	7.293e+08	3.00834e+08	3.6879e+08	1.90554e+08	2.64726e+08	1.97664	1.22589	1.38924	18.3835	26.99	4	5	31.0869	38.41	8	9	5.05955	6.92	2	2	7.71574	13.49	3	3	5.57424	10.03	2	2	17.3582	32.87	6	6	289	32.3828	5.24951
Q8Y767	Lmo1434 protein OS=Listeria monocytogenes GN=lmo1434 - [Q8Y767_LISMO]	1.03191e+09	9.93109e+08	5.40927e+08	2.92555e+08	1.9401e+08	4.31697e+08	0.962402	0.54084	2.22512	30.1683	24.32	9	9	42.6222	31.53	10	13	47.9478	20.54	7	13	19.6549	13.33	4	6	28.4973	16.58	5	8	46.7396	23.6	8	13	555	61.8707	6.15088
P58695	Asparaginyl-tRNA synthetase OS=Listeria monocytogenes GN=asnS - [SYN_LISMO]	2.18013e+09	2.25408e+09	5.64959e+08	428711306	4.05434e+08	6.88539e+08	1.03392	0.758836	1.69828	42.0094	41.4	10	13	97.0048	48.6	13	31	29.9469	26.98	8	10	36.8769	32.09	9	12	46.7056	44.88	11	14	46.0705	39.07	9	13	430	48.9675	5.12256
Q8Y853	UPF0637 protein lmo1065 OS=Listeria monocytogenes GN=lmo1065 - [Y1065_LISMO]	569802656	5.01456e+08	2.26466e+08	265419955	9.04739e+07	2.65635e+08	0.880052	1.17201	2.93603	19.1626	26.96	4	5	21.7714	38.73	6	7	17.6053	26.96	4	5	19.5825	33.33	5	6	16.4369	26.96	4	5	26.8386	33.33	5	7	204	23.7033	7.25439
Q8Y583	Lmo2188 protein OS=Listeria monocytogenes GN=lmo2188 - [Q8Y583_LISMO]	3.68918e+09	5.70599e+09	1.22169e+09	2.70331e+09	664396210	1.90565e+09	1.54668	2.21277	2.86825	110.334	46.59	21	33	107.637	48.25	23	33	87.9825	34.78	15	26	98.6807	47.59	18	29	64.7597	35.77	15	20	96.8075	45.26	19	28	601	68.5311	4.95752
Q92AU6	Lmo1711 protein OS=Listeria monocytogenes GN=lmo1711 - [Q92AU6_LISMO]	1.364e+09	1.78325e+09	3.00634e+08	3.7908e+08	1.37722e+08	5.74949e+08	1.30737	1.26093	4.17471	32.9106	28.54	8	10	36.6557	30.24	9	11	30.5988	28.54	8	10	24.8832	25.85	7	8	16.8029	17.32	5	6	32.6941	23.66	7	10	410	44.9314	4.76709
Q8Y7C5	Bifunctional protein FolD OS=Listeria monocytogenes GN=folD - [FOLD_LISMO]	1.74326e+09	1.89411e+09	7.44335e+08	8.75175e+08	2.06307e+08	7.08533e+08	1.08653	1.17578	3.43436	28.7054	42.61	8	9	34.4224	41.55	8	10	21.8626	28.52	6	8	24.6415	29.23	7	9	23.9153	28.52	6	9	21.3723	35.92	7	8	284	30.8875	5.60498
Q8Y3K6	Lmo2829 protein OS=Listeria monocytogenes GN=lmo2829 - [Q8Y3K6_LISMO]	0	2.74158e+09	0	9.305e+08	0	1.01641e+09	>	>	>					41.0022	51.26	11	13					42.3264	51.26	7	13					23.7808	39.7	5	7	199	22.1962	4.81787
Q8Y836	Lmo1082 protein OS=Listeria monocytogenes GN=lmo1082 - [Q8Y836_LISMO]	3.06759e+08	5.58346e+08	8.73887e+07	150474225	6.77268e+07	2.11741e+08	1.82015	1.7219	3.1264	15.5601	34.41	5	5	19.6372	42.47	5	7	8.64218	23.66	3	3	17.3037	43.01	5	6	15.5884	29.57	4	5	14.3014	43.01	5	5	186	21.0916	5.99854
Q8Y866	Peptide deformylase OS=Listeria monocytogenes GN=def - [DEF_LISMO]	1.44073e+08	3.79669e+08	7551300	3.91738e+07	4.11918e+07	1.87645e+08	2.63526	5.18769	4.55538	8.72574	29.51	3	3	19.8245	40.98	4	6	6.12723	22.95	2	2	11.9407	29.51	3	4	5.93433	22.95	2	2	12.3944	23.5	2	4	183	20.6305	5.30029
Q8Y782	Lmo1414 protein OS=Listeria monocytogenes GN=lmo1414 - [Q8Y782_LISMO]	6.44692e+08	1.01519e+09	2.13505e+08	2.60841e+08	6.99614e+07	4.08673e+08	1.57468	1.22171	5.8414	27.3368	34.96	7	7	59.124	50.64	11	15	15.6555	17.74	4	4	31.0308	27.51	6	8	17.1088	21.85	5	5	27.3855	34.96	7	7	389	41.0505	5.16064
Q8Y7K9	ATP-dependent Clp protease ATP-binding subunit ClpX OS=Listeria monocytogenes GN=clpX - [CLPX_LISMO]	2.63333e+09	3.83724e+09	6.70789e+08	9.23854e+08	2.39622e+08	1.14964e+09	1.45718	1.37726	4.79771	56.5592	43.44	15	17	80.4339	45.11	14	23	61.0116	36.52	12	20	71.8128	41.29	12	21	42.9812	30.07	8	13	56.1147	43.44	12	17	419	46.3693	4.81787
Q8Y6K8	MenF protein OS=Listeria monocytogenes GN=menF - [Q8Y6K8_LISMO]	1.58335e+09	1.24469e+09	3.29653e+08	3.8331e+08	1.7144e+08	5.47012e+08	0.786112	1.16277	3.19069	51.3454	29	12	16	40.7653	34.42	11	12	44.6666	30.74	12	14	43.303	27.92	9	14	39.4996	28.79	10	12	31.3841	24.46	9	10	462	51.6345	5.8335
Q8Y3P9	Catalase OS=Listeria monocytogenes GN=kat - [CATA_LISMO]	2184850524	2.53372e+09	8.04503e+08	4.97989e+08	3.76964e+08	8.05584e+08	1.15968	0.619002	2.13703	84.1846	46.93	20	27	66.2327	50	20	22	47.62	32.17	11	15	48.2117	32.79	13	16	50.0074	34.02	13	16	58.3523	41.8	14	18	488	55.8538	5.59229
Q8Y970	Lmo0663 protein OS=Listeria monocytogenes GN=lmo0663 - [Q8Y970_LISMO]	1.92396e+08	2.8423e+08	6.26169e+07	0	2.06424e+07	1.03216e+08	1.47732		5.00016	4.98184	10.76	2	2	15.8054	21.88	4	5	8.43257	14.24	3	3					4.7196	8.68	2	2	11.2408	21.53	4	4	288	32.2921	4.95752
Q8Y6T6	30S ribosomal protein S4 OS=Listeria monocytogenes GN=rpsD - [RS4_LISMO]	2.34523e+09	1.22875e+09	2.43299e+08	4.45611e+08	2.07015e+08	9.9563e+08	0.523935	1.83154	4.80944	40.8963	41.5	8	13	51.736	48.5	8	16	24.2969	31.5	5	8	28.497	29.5	5	9	12.4097	12.5	3	4	29.6375	41.5	6	9	200	22.721	10.0669
Q8Y3P3	Lmo2792 protein OS=Listeria monocytogenes GN=lmo2792 - [Q8Y3P3_LISMO]	2.23446e+09	2.69639e+09	9.36561e+08	6.35106e+08	5.7622e+08	1.25548e+09	1.20673	0.678126	2.17881	38.5248	45.24	7	10	44.4884	45.24	7	12	32.8513	37.7	6	9	30.0173	36.11	5	8	37.3762	50	8	11	35.1717	50	8	10	252	28.9039	7.38623
Q8Y4K5	Lmo2433 protein OS=Listeria monocytogenes GN=lmo2433 - [Q8Y4K5_LISMO]	8.28205e+08	7.24175e+08	0	8.49852e+07	8.60975e+07	0	0.874391	>		11.6911	22.22	3	4	5.98685	17.06	2	2					5.12591	14.68	2	2	10.2878	28.17	4	4					252	28.7721	5.13525
O32823	Thioredoxin reductase OS=Listeria monocytogenes GN=trxB - [TRXB_LISMO]	6.3789e+08	1.66988e+09	1.73134e+08	4.62106e+08	1.18352e+08	8.1789e+08	2.61782	2.66907	6.91063	17.7858	14.11	3	5	42.5332	32.92	7	12	11.1062	13.48	3	4	36.8168	26.02	6	10	14.2756	17.87	4	5	37.7488	26.65	5	10	319	34.1524	4.90674
Q8Y6E3	Lmo1744 protein OS=Listeria monocytogenes GN=lmo1744 - [Q8Y6E3_LISMO]	2.74264e+08	5.91026e+09	7.18313e+07	2.29062e+09	4.25568e+07	2.82259e+09	21.5495	31.8889	66.3254	29.2686	30.93	6	8	64.6332	49.83	13	19	16.6327	27.49	5	5	89.7053	39.86	8	26	20.1766	26.12	5	7	55.606	46.39	9	16	291	32.7197	5.08447
Q8Y5X5	Chorismate synthase OS=Listeria monocytogenes GN=aroC - [AROC_LISMO]	1.64543e+09	2.80672e+09	4.53213e+08	4.69861e+08	1.76194e+08	1.00532e+09	1.70577	1.03673	5.70578	41.8228	36.34	9	13	83.343	48.97	14	24	44.5666	36.6	10	14	63.6039	39.69	11	19	31.6163	28.09	7	9	41.9849	39.69	11	14	388	42.1457	7.07861
Q8Y5B6	Lmo2149 protein OS=Listeria monocytogenes GN=lmo2149 - [Q8Y5B6_LISMO]	0	3.51031e+08	0	1.3424e+08	0	1.93051e+08	>	>	>					13.1584	44.76	2	3					15.3898	49.52	3	4					22.8235	49.52	2	5	105	11.9651	5.79541
Q92A74	Hup protein OS=Listeria monocytogenes GN=hup - [Q92A74_LISMO]	0	2.56123e+08	0	1.27705e+08	0	1.2627e+08	>	>	>					14.591	31.87	3	4					16.1916	48.35	4	5					6.99318	36.26	2	2	91	9.87638	9.64209
Q8Y864	PdhB protein OS=Listeria monocytogenes GN=PdhB - [Q8Y864_LISMO]	1.02478e+08	2.16711e+08	0	4.45859e+07	2.559e+07	7.15821e+07	2.1147	>	2.79727	20.2149	19.38	4	6	35.7829	44.92	8	10					21.2217	23.38	3	6	8.74858	14.46	2	2	30.4587	23.38	4	8	325	35.2882	4.86865
Q8Y5V7	ResD protein OS=Listeria monocytogenes GN=resD - [Q8Y5V7_LISMO]	5.33654e+08	3.93232e+08	1.60704e+08	1.51385e+08	0	0	0.736867	0.942006		5.87089	13.03	2	2	13.751	31.09	4	4	6.54891	13.03	2	2	12.2382	16.81	3	4									238	27.4362	5.21143
Q8Y6D2	Glutamyl-tRNA(Gln) amidotransferase subunit A OS=Listeria monocytogenes GN=gatA - [GATA_LISMO]	1.38656e+10	8.12743e+09	4.46466e+09	1.15864e+09	2.62985e+09	3.25708e+09	0.586157	0.259515	1.2385	96.309	45.34	17	30	69.6884	46.38	15	22	79.2908	40.99	14	24	73.0989	38.1	11	21	59.1228	40.17	12	17	58.6975	37.89	10	16	483	52.3195	5.04639
Q8Y5M1	UDP-N-acetylmuramoylalanine--D-glutamate ligase OS=Listeria monocytogenes GN=murD - [MURD_LISMO]	8.52752e+08	1.33096e+09	4.9588e+08	5.33399e+08	2.12142e+08	5.22874e+08	1.56078	1.07566	2.46474	58.7391	38.46	10	16	37.941	32.31	8	10	40.4676	35.16	9	12	29.2959	27.69	7	8	33.8904	17.8	4	8	35.3071	23.74	6	9	455	50.399	5.75732
P66484	30S ribosomal protein S19 OS=Listeria monocytogenes GN=rpsS - [RS19_LISMO]	612406222	506066097	6.56154e+07	1.33944e+08	5.8158e+07	1.79076e+08	0.826357	2.04135	3.07913	6.03505	27.17	2	2	16.8532	48.91	3	5	5.59918	27.17	2	2	17.5689	48.91	3	5	6.18359	27.17	2	2	13.6624	48.91	3	4	92	10.4685	9.93506
Q8Y6V3	Lmo1578 protein OS=Listeria monocytogenes GN=lmo1578 - [Q8Y6V3_LISMO]	2.18763e+09	2.08179e+09	7.48681e+08	6.66977e+08	4.66825e+08	8.75032e+08	0.951621	0.890869	1.87443	70.5061	40.82	12	23	87.8238	45.21	12	29	34.6646	28.22	8	10	31.0244	28.22	8	9	34.181	32.33	9	10	38.4884	28.22	8	11	365	40.2817	4.99561
Q8Y5H3	Lmo2089 protein OS=Listeria monocytogenes GN=lmo2089 - [Q8Y5H3_LISMO]	0	4.42131e+08	0	1.58556e+08	0	1.8732e+08	>	>	>					22.4563	24.21	4	6					16.4019	24.21	4	5					10.6245	16.43	3	3	347	38.4322	6.59521
Q8Y822	GMP synthase [glutamine-hydrolyzing] OS=Listeria monocytogenes GN=guaA - [GUAA_LISMO]	6.11313e+08	8.84384e+08	7.31401e+07	1.51335e+08	8.27358e+07	5.36304e+08	1.44669	2.06911	6.48213	43.0563	34.17	11	13	70.7429	43.63	14	23	21.4886	12.74	4	7	25.9148	18.34	6	9	18.3284	18.53	6	6	28.3381	22.39	7	10	518	58.0776	5.07178
Q8Y6B1	Peptidase T OS=Listeria monocytogenes GN=pepT - [PEPT_LISMO]	9.74214e+08	923372374	2.71336e+08	3.09062e+08	1.63395e+08	4.66967e+08	0.947813	1.13904	2.8579	43.143	38.78	12	14	30.1745	37.56	10	10	32.0425	36.83	9	10	29.2329	20.49	5	10	36.8488	31.46	8	12	35.2291	26.59	7	12	410	45.7051	5.08447
Q8Y7I9	S-ribosylhomocysteine lyase OS=Listeria monocytogenes GN=luxS - [LUXS_LISMO]	1.96002e+09	2.1809e+09	4.28416e+08	4.47384e+08	3.17858e+08	1.02913e+09	1.11269	1.04428	3.23771	29.2509	43.23	6	10	24.0066	43.23	5	8	20.0034	30.32	5	7	20.2213	29.03	4	8	18.8833	25.81	4	7	15.8558	30.32	4	6	155	17.3565	5.50342
Q8Y653	Manganese-binding lipoprotein mntA OS=Listeria monocytogenes GN=mntA - [MNTA_LISMO]	3.50652e+08	0	0	7.50714e+07	0	1.03789e+08		>	>	7.04925	8.71	2	2									4.23522	6.45	2	2					8.47219	15.81	3	3	310	34.3957	5.63037
Q8Y570	Chaperone protein ClpB OS=Listeria monocytogenes GN=clpB - [CLPB_LISMO]	1.55384e+09	2.10383e+09	3.11348e+08	6.36265e+08	2.16167e+08	8.78296e+08	1.35396	2.04358	4.06305	93.4324	34.76	16	27	110.933	39.95	21	32	80.6865	31.76	14	23	67.6644	34.18	16	21	81.1957	32.91	15	23	80.2228	32.56	15	24	866	97.503	5.05908
Q92CE7	Lmo1257 protein OS=Listeria monocytogenes GN=lmo1257 - [Q92CE7_LISMO]	4.51854e+08	2.46865e+09	1.14413e+08	6.50906e+08	8.37485e+07	1.39342e+09	5.46338	5.68911	16.6381	5.68928	15.58	2	2	19.1487	41.56	5	6	6.99433	22.08	3	3	18.2079	32.47	5	7	6.89551	22.08	3	3	10.4829	32.47	4	4	154	18.0822	5.021
Q8Y848	UPF0358 protein lmo1070 OS=Listeria monocytogenes GN=lmo1070 - [Y1070_LISMO]	1.84667e+09	1.70529e+09	2.28968e+08	6.35719e+08	1.56503e+08	7.62471e+08	0.923444	2.77645	4.87193	16.589	35.48	5	6	20.2786	38.71	5	7	9.69796	33.33	3	4	27.9163	47.31	6	10	15.9225	39.78	4	6	14.1456	47.31	5	5	93	10.7366	5.94775
Q8Y7A7	Acylphosphatase OS=Listeria monocytogenes GN=acyP - [ACYP_LISMO]	0	1.81756e+08	0	0	0	0	>							6.76667	25.81	2	2																	93	10.4594	7.43018
Q8Y6J6	Lmo1688 protein OS=Listeria monocytogenes GN=lmo1688 - [Q8Y6J6_LISMO]	2.7041e+08	4712839497	8.21654e+07	1.67579e+09	4.14224e+07	2.6453e+09	17.4285	20.3953	63.8615	10.4453	13.71	3	3	47.7844	39.11	9	17	13.2221	17.74	3	4	62.4591	31.85	7	18	18.5635	13.71	3	5	40.5422	34.68	7	13	248	27.1693	6.37939
P28764	Superoxide dismutase [Mn] OS=Listeria monocytogenes GN=sodA - [SODM_LISMO]	1.09697e+09	0	0	2.02864e+08	0	4.93159e+08		>	>	8.76521	13.86	2	3									13.2562	27.72	3	4					17.0899	24.26	3	5	202	22.6172	5.41455
Q8Y8D1	Lmo0977 protein OS=Listeria monocytogenes GN=lmo0977 - [Q8Y8D1_LISMO]	9.27714e+08	956284648	2.64913e+08	3.12013e+08	1.28072e+08	4.25979e+08	1.0308	1.1778	3.3261	20.5547	35.34	6	6	30.1063	32.53	6	8	22.6652	24.9	4	6	44.2929	32.53	6	12	21.664	24.9	4	6	15.0201	28.92	4	4	249	28.8857	5.49072
Q8Y764	Aspartate-semialdehyde dehydrogenase OS=Listeria monocytogenes GN=lmo1437 - [Q8Y764_LISMO]	967486861	9.81599e+08	4.4407e+08	4.17036e+08	2.59354e+08	5.27483e+08	1.01459	0.939121	2.03384	22.1169	23.63	4	6	25.1011	31.12	5	7	24.3629	31.41	6	8	24.497	31.7	5	7	30.3482	27.38	6	9	34.159	27.38	6	10	347	37.5755	5.60498
Q8Y8A1	2,3,4,5-tetrahydropyridine-2,6-dicarboxylate N-acetyltransferase OS=Listeria monocytogenes GN=dapH - [DAPH_LISMO]	1.55515e+09	2.23457e+09	6.7953e+08	7.0718e+08	2.99569e+08	1.04718e+09	1.43688	1.04069	3.49561	39.8449	46.61	8	11	45.1466	46.61	9	13	53.0308	46.61	8	15	71.0719	46.61	9	21	39.7325	46.61	8	11	35.29	46.61	8	10	236	24.8191	5.07178
Q8Y5B2	Ribonucleoside-diphosphate reductase OS=Listeria monocytogenes GN=lmo2155 - [Q8Y5B2_LISMO]	2.91639e+09	1.80556e+09	4.47784e+08	4.89425e+08	2.63846e+08	1.00933e+09	0.619106	1.09299	3.82543	76.4244	36.57	19	24	92.6135	39.32	21	28	60.06	28.7	15	19	64.3805	27.26	13	19	59.6407	30.14	15	19	58.289	25.95	14	19	763	87.34	5.8208
Q8Y6X8	Glutamate-1-semialdehyde 2,1-aminomutase 1 OS=Listeria monocytogenes GN=hemL1 - [GSA1_LISMO]	7.05101e+08	5.6785e+08	86795604	1.84082e+08	6.93048e+07	2.61893e+08	0.805346	2.12087	3.77885	19.719	19.11	5	7	26.6693	26.34	8	8	6.54748	7.69	2	2	10.277	14.92	3	4	6.95299	7.69	2	2	31.3452	21.45	6	10	429	46.5739	5.64307
Q8Y8D0	Branched-chain-amino-acid aminotransferase OS=Listeria monocytogenes GN=lmo0978 - [Q8Y8D0_LISMO]	2214316529	3.89605e+09	5.73918e+08	5.52329e+08	3.73408e+08	1.12275e+09	1.75948	0.962382	3.00678	17.2578	20.94	5	5	27.8177	30.97	7	9	23.873	28.32	6	7	21.5026	20.94	5	6	24.5717	25.37	6	8	22.6357	32.74	7	8	339	37.3525	5.2749
Q8Y5G1	Glutamine amidotransferase subunit pdxT OS=Listeria monocytogenes GN=pdxT - [PDXT_LISMO]	7.12566e+08	568425494	7.80765e+07	0	6.48915e+07	401114449	0.797716		6.18131	5.36439	18.62	2	2	11.7866	18.62	2	3	7.79782	18.62	2	2					7.76988	18.62	2	2	11.9807	30.85	3	3	188	20.4867	5.41455
Q8YAB9	tRNA-dihydrouridine synthase OS=Listeria monocytogenes GN=lmo0227 - [Q8YAB9_LISMO]	0	3.17199e+08	0	7.33555e+07	0	1.15253e+08	>	>	>					17.625	19.03	4	5					23.2695	19.64	4	7					22.508	22.05	5	7	331	36.7669	6.44287
P0A3L1	Translation initiation factor IF-3 OS=Listeria monocytogenes GN=infC - [IF3_LISMO]	2.94592e+09	2.25213e+09	5.25972e+08	5.58043e+08	4.28469e+08	1.35839e+09	0.764489	1.06098	3.17034	30.7611	46.2	7	10	21.7789	35.67	6	7	18.3475	46.2	5	6	14.9315	46.2	5	5	12.5947	32.16	4	4	22.4647	39.18	5	7	171	19.6345	9.53955
Q8Y4P5	Ferredoxin--NADP reductase 2 OS=Listeria monocytogenes GN=lmo2390 - [FENR2_LISMO]	4.6741e+08	6.60511e+08	3.35382e+08	1.86988e+08	1.56431e+08	3.01797e+08	1.41313	0.557535	1.92927	22.2558	21.75	3	5	31.8022	37.46	6	9	16.1362	21.75	3	4	15.597	25.68	4	4	13.5982	25.68	4	4	21.4235	25.68	4	5	331	36.4036	5.42725
Q8Y915	Glucosamine--fructose-6-phosphate aminotransferase [isomerizing] OS=Listeria monocytogenes GN=glmS - [GLMS_LISMO]	2905137538	2.24711e+09	8.15769e+08	3.8868e+08	3.8069e+08	6.04555e+08	0.773496	0.476458	1.58805	89.7414	34.44	14	23	83.7447	39.43	18	23	79.5544	39.27	13	21	58.364	32.78	12	16	69.6364	32.78	15	19	77.5483	37.6	14	20	601	65.726	5.30029
Q8Y577	Tryptophanyl-tRNA synthetase OS=Listeria monocytogenes GN=trpS - [SYW_LISMO]	1.83807e+08	5.50722e+08	1.77308e+08	3.1184e+08	5.73657e+07	2.44237e+08	2.9962	1.75874	4.25754	20.7729	27.19	5	6	48.4316	41.39	12	15	20.0471	27.49	6	6	37.7488	36.56	8	11	18.9321	15.11	3	5	28.912	27.79	7	8	331	36.8693	7.38623
Q8Y8E7	Glucosamine-6-phosphate deaminase OS=Listeria monocytogenes GN=nagB - [NAGB_LISMO]	3.14465e+09	1.32619e+09	6.99854e+08	5.09803e+08	5.3434e+08	6.13639e+08	0.421728	0.728441	1.14841	24.8549	42.31	6	8	26.01	45.3	7	9	28.2425	41.88	6	9	23.5004	41.88	5	7	24.6997	31.2	6	8	26.6214	44.87	7	9	234	25.4949	4.91943
Q8Y825	NH(3)-dependent NAD(+) synthetase OS=Listeria monocytogenes GN=nadE - [NADE_LISMO]	8.13597e+08	1.17325e+09	1.2001e+08	1.85454e+08	1.77395e+08	408046153	1.44205	1.54533	2.30021	98.8646	33.21	5	29	163.369	45.26	8	46	59.2782	30.66	4	18	90.8356	36.5	5	26	25.6971	30.66	4	8	146.106	33.21	6	40	274	30.5695	5.21143
Q8Y9G8	Lmo0560 protein OS=Listeria monocytogenes GN=lmo0560 - [Q8Y9G8_LISMO]	1.21436e+09	674805958	2.46155e+08	1.86486e+08	1.19863e+08	2.96308e+08	0.55569	0.757592	2.47205	36.8261	36.46	9	10	30.6572	36.24	9	10	26.363	27.29	8	8	24.7066	32.75	8	8	23.6628	23.36	6	7	22.0445	26.42	7	7	458	49.2359	5.75732
Q8Y5N8	Isoleucyl-tRNA synthetase OS=Listeria monocytogenes GN=ileS - [SYI_LISMO]	3.63738e+09	1.9908e+09	1.68213e+09	6.48123e+08	7.30757e+08	6.66608e+08	0.547317	0.385298	0.912216	102.591	33.88	17	29	107.729	39.63	22	32	116.932	31.05	17	34	52.644	17.81	8	15	63.0432	25.41	14	19	56.8022	28.12	13	17	921	103.785	5.31299
Q8Y6T0	Lmo1603 protein OS=Listeria monocytogenes GN=lmo1603 - [Q8Y6T0_LISMO]	7.1141e+08	1.04073e+09	2.86078e+08	1.64925e+08	1.2221e+08	4.69481e+08	1.46291	0.576503	3.84158	29.6562	29.19	9	10	40.1035	42.7	12	13	26.8733	23.51	8	9	22.8537	27.84	8	8	25.1675	24.32	8	8	17.2158	16.49	5	6	370	41.0393	4.81787
P58724	Blue-light photoreceptor OS=Listeria monocytogenes GN=lmo0799 - [PHOT_LISMO]	3.26459e+08	4.80186e+08	1.29165e+08	1.06751e+08	8.58226e+07	1.60325e+08	1.47089	0.826465	1.8681	17.6206	28.85	4	5	18.4105	36.36	5	5	10.7433	12.25	2	3	10.8219	17.79	3	3	8.08535	12.25	2	2	14.5618	28.85	4	4	253	28.7984	4.83057
Q8Y4U2	Pseudouridine-5'-phosphate glycosidase OS=Listeria monocytogenes GN=psuG - [Q8Y4U2_LISMO]	2.61603e+08	419685653	1.53035e+08	1.74051e+08	7.53736e+07	2.1258e+08	1.60429	1.13733	2.82035	8.27377	11.22	3	3	9.89471	14.85	3	3	9.43177	7.92	2	3	12.5429	18.15	4	4	5.67395	6.6	2	2	6.09874	7.92	2	2	303	32.568	4.84326
Q8Y9I9	Tagatose 1,6-diphosphate aldolase OS=Listeria monocytogenes GN=lacD - [LACD_LISMO]	1.38802e+09	2.31988e+09	5.11642e+08	5.94106e+08	2.3964e+08	7.46317e+08	1.67135	1.16117	3.11433	46.9938	40.53	11	14	67.568	39.94	12	20	43.9433	28.11	8	13	55.7941	36.39	11	16	36.8857	27.81	7	11	50.3252	31.66	11	15	338	37.6602	5.04639
Q8Y6M0	S-adenosylmethionine synthase OS=Listeria monocytogenes GN=metK - [METK_LISMO]	2.95314e+08	5.80958e+08	1.24441e+08	1.15305e+08	3.11588e+07	1.39057e+08	1.96726	0.926581	4.46286	35.1089	33.08	8	10	34.2332	32.33	8	10	21.8682	13.53	3	5	22.4045	13.53	3	6	21.0111	17.04	4	6	22.1555	22.56	4	6	399	43.5244	5.14795
Q8Y581	Lmo2192 protein OS=Listeria monocytogenes GN=lmo2192 - [Q8Y581_LISMO]	2226107050	1.20691e+09	7.07752e+08	4.91906e+08	3.88635e+08	6.68769e+08	0.54216	0.695026	1.72082	30.65	28.57	8	10	33.2705	43.48	9	10	21.8514	18.32	5	7	24.7904	18.32	5	8	19.0362	18.32	5	6	21.5658	18.94	6	7	322	36.5979	7.35693
Q8Y5M2	UDP-N-acetylglucosamine--N-acetylmuramyl-(pentapeptide) pyrophosphoryl-undecaprenol N-acetylglucosamine transferase OS=Listeria monocytogenes GN=murG - [MURG_LISMO]	6.70208e+08	4.78314e+08	7.58646e+07	1.24177e+08	1.3104e+08	3.65214e+08	0.71368	1.63682	2.78704	21.0291	23.97	6	7	24.6504	32.51	7	8	8.21071	10.47	3	3	10.8497	12.4	4	5	13.1189	17.08	5	5	17.7015	19.28	5	6	363	38.9906	7.12256
Q8Y6W5	Isocitrate dehydrogenase [NADP] OS=Listeria monocytogenes GN=citC - [Q8Y6W5_LISMO]	9.98457e+08	1.16291e+09	5.43673e+08	4.9621e+08	1.40871e+08	5.22901e+08	1.16471	0.912699	3.71192	19.8678	28.1	7	7	25.156	22.38	6	8	23.3132	25.24	6	8	22.9006	25.24	6	7	18.0614	20	5	6	23.3426	20.48	5	7	420	46.1189	5.2749
Q8Y5G0	Pta protein OS=Listeria monocytogenes GN=pta - [Q8Y5G0_LISMO]	1.33065e+09	1.39663e+09	2.93456e+08	3.11619e+08	1.56892e+08	518599401	1.04959	1.06189	3.30545	22.937	26.46	5	6	30.8219	38.46	7	8	26.7843	39.69	7	8	36.16	38.46	6	9	28.7215	31.08	5	7	31.7058	30.15	5	9	325	34.3921	5.2749
Q8Y6U8	Probable thiol peroxidase OS=Listeria monocytogenes GN=tpx - [TPX_LISMO]	5.02099e+08	2.46396e+08	0	1.9437e+08	5.41024e+07	1.46505e+08	0.490731	>	2.70792	8.88151	23.03	2	3	8.23655	43.64	3	3					12.8307	23.03	3	4	10.335	23.03	2	3	10.5544	23.03	3	3	165	18.1223	5.36377
Q8Y685	Lmo1812 protein OS=Listeria monocytogenes GN=lmo1812 - [Q8Y685_LISMO]	0	4.96946e+08	0	2.41963e+08	0	4.01685e+08	>	>	>					19.3759	26.35	3	4					12.2184	12.5	2	3					15.9663	16.22	3	5	296	30.8375	4.88135
Q8Y742	Elongation factor 4 OS=Listeria monocytogenes GN=lepA - [LEPA_LISMO]	383794132	4.39315e+08	1.96665e+08	2.27385e+08	9.15771e+07	1.82756e+08	1.14466	1.15621	1.99565	57.6523	32.07	11	16	48.8519	30.43	11	13	38.4891	16.45	6	10	42.4347	23.68	8	12	44.1741	24.34	9	12	69.7765	31.91	11	19	608	67.7803	5.16064
P66352	30S ribosomal protein S11 OS=Listeria monocytogenes GN=rpsK - [RS11_LISMO]	3136637051	2.59287e+09	6.24439e+08	6.07842e+08	2.24527e+08	9.47675e+08	0.826639	0.973422	4.22076	9.25233	30.23	2	3	14.3064	43.41	5	5	17.5449	30.23	2	6	18.1291	30.23	3	6	12.1921	30.23	3	4	14.4943	30.23	3	5	129	13.7774	11.3999
Q927Y2	Lmo2511 protein OS=Listeria monocytogenes GN=lmo2511 - [Q927Y2_LISMO]	0	0	0	6.27998e+08	0	0		>														12.3801	16.04	2	4									187	21.62	5.38916
Q8Y8E2	Listeria epitope LemA OS=Listeria monocytogenes GN=lemA - [Q8Y8E2_LISMO]	0	2.2716e+08	0	0	0	0	>							7.8406	22.7	3	3																	185	21.1812	7.48877
Q8Y6S8	UDP-N-acetylmuramate--L-alanine ligase OS=Listeria monocytogenes GN=murC - [MURC_LISMO]	9.8567e+08	1.30709e+09	3.91552e+08	5.0546e+08	1.92619e+08	4.21084e+08	1.32609	1.29092	2.18609	39.1409	38.03	10	12	47.3583	41.16	12	14	34.8495	35.57	9	11	43.2537	37.14	10	14	27.9151	28.64	8	9	43.4775	35.12	10	13	447	50.0424	5.59229
Q8Y436	Lmo2637 protein OS=Listeria monocytogenes GN=lmo2637 - [Q8Y436_LISMO]	1.24119e+08	2.20282e+08	1.78517e+07	0	0	9.73011e+07	1.77476		>	7.49736	11.37	2	2	13.2297	16.05	3	4	8.86076	11.37	2	2									5.40373	9.03	2	2	299	32.7213	6.65381
Q8YAG5	Lmo0161 protein OS=Listeria monocytogenes GN=lmo0161 - [Q8YAG5_LISMO]	0	9.77853e+08	0	1.77517e+08	0	2.36902e+08	>	>	>					32.2819	33.7	6	10					25.4128	24.28	4	8					17.712	24.28	4	6	276	31.7169	5.08447
Q8Y781	Lmo1415 protein OS=Listeria monocytogenes GN=lmo1415 - [Q8Y781_LISMO]	1.36362e+09	1.56518e+09	3.80409e+08	2.47526e+08	1.47696e+08	5.58509e+08	1.14781	0.650684	3.78147	22.6214	31.44	6	7	37.6603	41.49	9	11	23.8702	31.44	6	7	25.6347	30.67	6	8	11.2491	10.57	2	3	19.098	31.44	6	6	388	43.217	5.21143
Q8Y4U5	Fructose-1-phosphate kinase OS=Listeria monocytogenes GN=fruB - [Q8Y4U5_LISMO]	5.26342e+08	6.53758e+08	2.89331e+08	8.58433e+07	1.47983e+08	3.19835e+08	1.24208	0.296696	2.1613	41.8623	37.79	8	12	30.3637	31.27	6	8	39.4925	37.79	7	11	26.4006	36.48	7	8	28.3871	37.79	8	8	46.4767	42.02	9	13	307	33.1624	5.56689
Q8Y709	Aspartyl-tRNA synthetase OS=Listeria monocytogenes GN=aspS - [SYD_LISMO]	1.09508e+09	8.79247e+08	2.64836e+08	3.8994e+08	9.70754e+07	5.7894e+08	0.80291	1.47238	5.96382	70.1132	31.64	13	18	71.1466	30.8	14	18	36.0502	23.52	7	10	62.5681	28.43	13	17	29.8958	19.97	8	9	70.9699	33.67	14	19	591	66.3412	5.07178
Q8Y6B8	Adenylosuccinate lyase OS=Listeria monocytogenes GN=purB - [Q8Y6B8_LISMO]	6.3796e+08	4.93716e+08	3.98222e+08	2.72296e+08	1.22886e+08	2.34977e+08	0.773898	0.683778	1.91216	23.6781	20.23	7	8	28	24.42	8	9	19.5559	21.63	7	7	15.1484	11.86	4	5	25.4848	15.58	6	9	18.145	18.6	6	7	430	49.0542	5.74463
Q8YA86	Lmo0273 protein OS=Listeria monocytogenes GN=lmo0273 - [Q8YA86_LISMO]	0	4.14447e+08	1.05195e+08	1.41766e+08	5.46926e+07	2.90641e+08	>	1.34764	5.31408					10.2133	24.55	3	3	15.4485	37.13	3	4	13.4532	42.51	4	4	8.13667	32.93	3	3	21.8575	42.51	5	7	167	18.6507	5.65576
Q8Y3X2	Lmo2707 protein OS=Listeria monocytogenes GN=lmo2707 - [Q8Y3X2_LISMO]	3.87902e+08	7.61022e+08	1.67955e+08	1.76085e+08	8.87459e+07	2.44541e+08	1.96189	1.04841	2.75552	9.31461	42.47	3	3	14.883	42.47	3	4	15.1451	42.47	3	4	14.3164	42.47	3	4	12.3702	42.47	3	3	15.196	42.47	3	4	73	8.3313	4.97021
Q8Y7F9	NusA protein OS=Listeria monocytogenes GN=nusA - [Q8Y7F9_LISMO]	1.05305e+09	1.28375e+09	2.48513e+08	3.55528e+08	1.73644e+08	7.44782e+08	1.21908	1.43062	4.28914	26.8493	27.96	7	8	42.5962	39.78	10	13	31.9539	27.96	7	10	40.8137	36.56	9	13	31.9634	26.88	7	10	35.9207	36.29	10	11	372	41.6585	4.86865
Q8Y770	Lmo1431 protein OS=Listeria monocytogenes GN=lmo1431 - [Q8Y770_LISMO]	1.08924e+09	9.76881e+08	2.45514e+08	1.96244e+08	1.01494e+08	1.47742e+08	0.896843	0.799318	1.45567	48.4986	30.58	10	13	38.7152	30.96	10	12	37.5536	13.7	4	8	20.0106	17.45	4	5	18.086	10.13	3	5	28.5279	15.01	4	6	533	60.2606	5.09717
Q8Y5X0	Lmo1935 protein OS=Listeria monocytogenes GN=lmo1935 - [Q8Y5X0_LISMO]	1.08091e+08	1.34207e+08	0	2.23396e+07	0	7.33802e+07	1.24161	>	>	11.0726	15.95	3	4	16.7017	15.95	3	5					5.20757	9.82	2	2					11.7314	13.8	3	4	326	36.6116	5.0083
Q8Y6M4	Leucyl-tRNA synthetase OS=Listeria monocytogenes GN=leuS - [SYL_LISMO]	1.4552e+09	1.11323e+09	6.44046e+08	3.79746e+08	2.7493e+08	5.16447e+08	0.764998	0.589626	1.87847	50.2589	36.24	13	16	50.6897	25.4	11	14	72.9388	31.01	10	19	28.682	16.81	6	8	41.2175	24.78	10	12	59.1489	27.65	10	17	803	91.8384	5.10986
Q8YAB8	Lysyl-tRNA synthetase OS=Listeria monocytogenes GN=lysS - [SYK_LISMO]	1.77115e+09	2.22394e+09	719913422	8.19885e+08	3.12773e+08	8.22636e+08	1.25565	1.13887	2.63014	53.0496	27.11	9	17	46.3093	32.93	11	15	27.3477	22.09	7	9	38.9526	31.33	11	14	40.6038	26.71	9	13	33.6818	24.5	8	11	498	57.4021	5.26221
Q8Y6Z6	L-lactate dehydrogenase 2 OS=Listeria monocytogenes GN=ldh2 - [LDH2_LISMO]	1.13761e+09	1.3755e+09	3.58436e+08	2.24463e+08	1.57796e+08	6.1114e+08	1.20912	0.626228	3.87298	20.4624	27.01	6	6	31.6538	42.12	9	10	23.0448	30.23	6	7	18.6025	19.94	5	6	11.3815	15.76	4	4	31.0153	33.76	7	10	311	33.7195	5.56689
Q8Y565	Ferrochelatase OS=Listeria monocytogenes GN=hemH - [HEMH_LISMO]	1.72397e+09	1.65264e+09	3.3944e+08	5.54932e+08	2.19409e+08	6.59484e+08	0.958621	1.63484	3.00572	27.6961	24.27	5	8	31.8809	35.92	8	10	33.2319	24.27	5	10	26.3804	20.71	4	8	25.554	25.24	5	7	34.2051	33.33	7	10	309	35.3217	5.23682
Q8Y8J8	Lmo0903 protein OS=Listeria monocytogenes GN=lmo0903 - [Q8Y8J8_LISMO]	5.21849e+08	1.30055e+09	0	1.87366e+08	0	215322108	2.4922	>	>	14.0459	32.54	2	3	9.01453	32.54	2	2					19.6834	32.54	2	5					22.9244	32.54	2	6	126	13.9673	5.49072
Q8YAD4	Bifunctional protein glmU OS=Listeria monocytogenes GN=glmU - [GLMU_LISMO]	7.86506e+08	7.96949e+08	1.88484e+08	1.4715e+08	1.01038e+08	3.23324e+08	1.01328	0.780701	3.20001	51.0144	35.01	12	15	46.403	38.29	13	15	27.0787	24.95	7	9	20.0134	18.6	6	6	25.7432	19.91	7	8	43.4182	26.7	11	13	457	49.7797	6.354
Q8Y6X9	Valyl-tRNA synthetase OS=Listeria monocytogenes GN=valS - [SYV_LISMO]	1.9435e+09	2.02626e+09	6.50223e+08	3.77626e+08	2.77568e+08	9.53277e+08	1.04259	0.580763	3.43439	61.4469	27.75	16	20	74.3333	31.71	20	25	66.9431	26.05	15	20	51.1331	21.86	13	16	56.9081	24.58	16	19	56.9912	25.93	14	18	883	102.029	5.08447
Q92AP5	Lmo1763 protein OS=Listeria monocytogenes GN=lmo1763 - [Q92AP5_LISMO]	0	0	0	0	0	9.63423e+07			>																					9.46204	41.84	2	3	98	11.2594	4.99561
Q8Y640	Peptide methionine sulfoxide reductase MsrA OS=Listeria monocytogenes GN=msrA - [MSRA_LISMO]	0	0	0	0	0	2.60059e+08			>																					6.05623	19.77	2	2	177	19.9207	5.59229
P66699	DNA-directed RNA polymerase subunit alpha OS=Listeria monocytogenes GN=rpoA - [RPOA_LISMO]	1.80886e+09	3.06957e+09	3.01942e+08	3.82819e+08	1.59971e+08	7.45459e+08	1.69696	1.26786	4.65997	41.9923	29.62	6	15	39.9133	41.72	7	13	29.7118	29.62	6	9	41.5577	35.35	7	13	36.737	31.53	7	13	23.2862	23.25	5	7	314	34.8841	4.89404
Q92CZ5	Lmo1027 protein OS=Listeria monocytogenes GN=lmo1027 - [Q92CZ5_LISMO]	8.04082e+08	843581560	1.84493e+08	1.55264e+08	6.95801e+07	3.29617e+08	1.04912	0.841574	4.73724	24.6463	16.04	6	8	40.2141	28.29	10	13	23.5338	17.48	5	7	24.3406	22.7	8	9	6.15309	3.96	2	2	26.6334	24.86	8	8	555	61.5208	6.63916
Q8Y5L9	UDP-N-acetylmuramoyl-L-alanyl-D-glutamate--2,6-diaminopimelate ligase OS=Listeria monocytogenes GN=murE - [MURE_LISMO]	7.74817e+08	8.81986e+08	1.93068e+08	1.37589e+08	8.01548e+07	2.61226e+08	1.13831	0.712646	3.25902	34.6452	32.79	7	11	33.7369	25.05	5	11	23.3634	22.81	6	7	20.9472	20.98	4	6	27.9683	27.7	7	8	18.2919	16.7	4	5	491	53.7135	5.46533
Q8Y6T2	3-deoxy-D-arabino-heptulosonate 7-phosphate synthase OS=Listeria monocytogenes GN=aroA - [Q8Y6T2_LISMO]	2.20616e+09	2.65842e+09	4.63282e+08	4.62289e+08	3.451e+08	5.17987e+08	1.205	0.997856	1.50098	39.9337	38.23	9	11	59.4659	39.06	11	16	44.3067	25.76	8	13	53.6139	39.06	9	14	27.9258	31.58	8	8	37.2447	29.92	7	9	361	39.6601	5.5415
Q8Y5U9	Fur protein OS=Listeria monocytogenes GN=fur - [Q8Y5U9_LISMO]	1.16506e+08	2.62428e+08	0	7.71523e+07	0	1.26907e+08	2.25248	>	>	9.36307	26	2	3	9.78388	26	3	3					4.93401	12.67	2	2					6.95393	30	3	3	150	17.317	6.41748
Q8Y576	Lmo2199 protein OS=Listeria monocytogenes GN=lmo2199 - [Q8Y576_LISMO]	0	0	0	5.61409e+07	8.79542e+06	0		>														5.85846	16.67	2	2	5.1751	16.67	2	2					138	14.4943	4.88135
Q8Y788	DNA mismatch repair protein mutL OS=Listeria monocytogenes GN=mutL - [MUTL_LISMO]	2.42512e+08	4.97596e+08	1.48299e+08	2.86677e+08	4.7549e+07	3.41199e+08	2.05184	1.9331	7.17573	18.179	13.81	4	5	36.5851	29.12	9	9	28.3433	17.3	5	7	36.3278	24.29	8	10	30.1869	15.47	5	8	26.8181	15.97	6	8	601	67.7523	5.63037
Q8Y7A2	Lmo1387 protein OS=Listeria monocytogenes GN=lmo1387 - [Q8Y7A2_LISMO]	1.15606e+08	1.62624e+08	0	5.53646e+07	0	9.24742e+07	1.40671	>	>	8.76562	12.9	3	3	17.3769	23.66	4	5					9.77731	11.83	3	4					6.39938	9.32	2	2	279	30.5135	4.83057
Q8Y708	Histidyl-tRNA synthetase OS=Listeria monocytogenes GN=hisS - [SYH_LISMO]	2.34579e+09	2.07673e+09	3.3733e+08	4.13801e+08	1.95812e+08	7.33244e+08	0.8853	1.22669	3.74463	45.7274	30.82	8	12	59.0226	39.29	12	16	61.338	35.29	9	16	62.1929	38.35	10	17	58.1759	36.47	9	15	52.0365	32.24	8	14	425	48.4146	5.36377
P60357	UPF0297 protein lmo1503 OS=Listeria monocytogenes GN=lmo1503 - [Y1503_LISMO]	0	2.83257e+08	0	6.93567e+07	0	0	>	>						11.4472	41.11	3	3					9.02165	41.11	3	3									90	10.5373	5.09717
P0A438	Phosphocarrier protein HPr OS=Listeria monocytogenes GN=ptsH - [PTHP_LISMO]	0	5.07537e+08	0	9.18762e+07	0	1.65987e+08	>	>	>					5.83922	27.27	2	2					8.33176	40.91	3	3					5.65435	27.27	2	2	88	9.39786	4.80518
Q8Y4A4	Homoserine dehydrogenase OS=Listeria monocytogenes GN=hom - [Q8Y4A4_LISMO]	5.25688e+08	5.23846e+08	2.1123e+08	2.0223e+08	7.5334e+07	2.40593e+08	0.996496	0.957395	3.19368	25.7889	22.66	7	8	31.8307	18.93	5	9	30.7915	16.36	5	8	31.2502	16.36	5	9	32.1722	19.16	6	9	29.2541	16.36	5	8	428	46.3128	5.26221
Q8Y6P3	CitB protein OS=Listeria monocytogenes GN=citB - [Q8Y6P3_LISMO]	1.02695e+09	1.67252e+09	3.88294e+08	6.07235e+08	1.29403e+08	7.30421e+08	1.62863	1.56385	5.64453	59.8008	25.56	16	18	79.5675	33.22	22	26	32.1977	17	10	10	51.6523	22.11	13	17	26.1902	15.22	8	8	68.4737	25.89	14	20	900	98.2451	4.99561
Q8Y5W6	Cytidylate kinase OS=Listeria monocytogenes GN=cmk - [KCY_LISMO]	2.71014e+08	5.05894e+08	9.21003e+07	1.46361e+08	0	2.97442e+08	1.86667	1.58915	>	11.0216	17.41	2	4	7.47712	20.98	3	3	4.64005	8.48	2	2	5.07901	12.95	2	2					8.17942	20.98	3	3	224	24.8021	6.25244
Q8Y6C9	ATP-dependent DNA helicase OS=Listeria monocytogenes GN=pcrA - [Q8Y6C9_LISMO]	4.38917e+08	5.08038e+08	4.64243e+07	7.76343e+07	5.46127e+07	2.34394e+08	1.15748	1.67228	4.29193	19.6659	14.77	6	7	38.6962	22.44	9	13	12.2208	5.2	3	4	8.45071	5.2	3	3	8.85787	7.52	3	3	20.475	14.64	6	7	731	83.1118	5.85889
Q8Y835	dTDP-glucose 4,6-dehydratase OS=Listeria monocytogenes GN=lmo1083 - [Q8Y835_LISMO]	2.15465e+09	2.70233e+09	5.68199e+08	6.0806e+08	9.35e+07	1.00093e+09	1.25419	1.07015	10.7051	28.9932	32.32	5	8	29.6065	36.59	6	8	27.4587	32.32	5	8	30.1863	32.32	5	8	22.7794	25.3	4	6	23.6176	32.32	5	7	328	36.8786	5.33838
P21171	Protein p60 OS=Listeria monocytogenes GN=iap - [P60_LISMO]	0	1.56094e+09	1.08905e+07	4.61053e+08	7.30095e+06	4.70959e+08	>	42.3353	64.5065					50.8324	27.27	11	16	5.28512	5.99	2	2	51.1625	39.67	11	17	4.98712	5.99	2	2	46.9743	28.1	10	15	484	50.5563	9.30518
Q8Y4A2	UDP-N-acetylglucosamine 1-carboxyvinyltransferase 2 OS=Listeria monocytogenes GN=murA2 - [MURA2_LISMO]	0	1.68898e+08	5.08701e+07	7.86731e+07	0	1.03266e+08	>	1.54655	>					13.0211	20.09	3	4	4.81917	9.93	2	2	9.95222	11.11	2	3					9.48911	12.06	3	3	423	45.076	6.46826
Q8Y8S1	Lmo0823 protein OS=Listeria monocytogenes GN=lmo0823 - [Q8Y8S1_LISMO]	1.87023e+09	1.05247e+09	1.31627e+08	3.01673e+08	0	5.60201e+08	0.562747	2.29187	>	7.72088	8.03	2	3	16.4533	20.8	4	6	5.41847	13.14	2	2	8.89019	18.25	3	3					17.6626	31.02	5	6	274	31.0569	5.26221
Q8Y791	Lmo1401 protein OS=Listeria monocytogenes GN=lmo1401 - [Q8Y791_LISMO]	6.46717e+08	6.17422e+08	2.23974e+08	2.21666e+08	5.28732e+07	1.99069e+08	0.954702	0.989695	3.76503	12.1398	22.47	4	4	9.58873	13.48	2	3	12.2079	27.72	4	4	4.89493	13.86	2	2	11.7293	19.1	3	4	10.2421	22.85	3	4	267	29.8803	5.70654
Q8YAA3	50S ribosomal protein L7/L12 OS=Listeria monocytogenes GN=rplL - [RL7_LISMO]	527388106	8.81493e+08	1.69578e+08	3.48321e+08	6.27548e+07	4.14317e+08	1.67143	2.05404	6.60215	9.27767	30	3	3	13.3618	40	4	4	10.0104	30	3	3	12.752	40	4	4	6.56531	20	2	2	9.64173	30	3	3	120	12.4617	4.55127
Q8Y766	Dihydrodipicolinate synthase OS=Listeria monocytogenes GN=dapA - [DAPA_LISMO]	1.21255e+08	2.58083e+08	7.81346e+07	3.42027e+07	3.54721e+07	1.16721e+08	2.12843	0.437741	3.29049	9.53958	18.09	3	3	20.7712	24.57	4	6	9.21968	13.99	2	3	9.21422	17.75	3	3	5.8227	13.99	2	2	19.1272	24.57	4	6	293	31.3886	6.16357
Q8Y837	Glucose-1-phosphate thymidylyltransferase OS=Listeria monocytogenes GN=lmo1081 - [Q8Y837_LISMO]	9.61851e+08	1.35476e+09	1.47152e+08	3.27565e+08	9.27462e+07	7.23944e+08	1.40849	2.22603	7.80565	19.7697	25.69	4	6	19.7605	29.51	5	6	11.7894	25.35	4	4	17.4757	25.69	5	6	8.66945	17.36	3	3	26.8437	25.69	5	8	288	32.2097	4.97021
Q8YA10	Lmo0356 protein OS=Listeria monocytogenes GN=lmo0356 - [Q8YA10_LISMO]	1466623846	1.5397e+09	1.27733e+08	2.20934e+08	1.07785e+08	4.75102e+08	1.04983	1.72965	4.40787	20.7342	24.26	5	6	24.4059	32.25	7	7	18.3888	21.01	4	5	14.4033	13.61	4	5	13.7783	13.61	4	5	37.2639	31.66	6	12	338	39.4166	5.35107
Q8Y6Z9	S-adenosylmethionine:tRNA ribosyltransferase-isomerase OS=Listeria monocytogenes GN=queA - [QUEA_LISMO]	2.6527e+08	2.1343e+08	8.0696e+07	8.07791e+07	3.80891e+07	9.36303e+07	0.804576	1.00103	2.45819	5.39922	7.89	2	2	17.3594	22.51	5	6	8.70517	15.2	3	3	8.2254	12.28	3	3	8.30688	15.2	3	3	10.977	19.59	4	4	342	38.2357	5.24951
Q8Y3Y7	Lmo2692 protein OS=Listeria monocytogenes GN=lmo2692 - [Q8Y3Y7_LISMO]	2919129447	4.34563e+09	1301015757	6.34769e+08	5.26856e+08	1.66563e+09	1.48867	0.487903	3.16145	9.80675	39.45	2	3	17.1268	39.45	2	5	20.1741	39.45	2	6	21.9221	39.45	2	7	17.54	39.45	2	5	13.5226	39.45	2	4	109	11.806	5.12256
Q8Y441	50S ribosomal protein L23 OS=Listeria monocytogenes GN=rplW - [RL23_LISMO]	1.96013e+08	2.95551e+08	0	7.55202e+07	0	1.58282e+08	1.50781	>	>	9.82047	39.36	3	3	10.9192	27.66	3	3					11.2902	28.72	3	3					21.5097	39.36	4	6	94	10.9088	9.5835
Q8Y4A7	Thymidine kinase OS=Listeria monocytogenes GN=tdk - [KITH_LISMO]	3.97546e+08	5.3128e+08	3.88716e+08	1.42929e+08	107563462	1.85303e+08	1.3364	0.367696	1.72273	13.1391	14.14	2	4	6.76297	14.14	2	2	9.55251	14.14	2	3	7.25305	14.14	2	2	5.85152	14.14	2	2	18.2799	32.46	4	6	191	21.8632	7.32764
Q8Y6D0	DNA ligase OS=Listeria monocytogenes GN=ligA - [DNLJ_LISMO]	4.58966e+08	2.03687e+09	9.82511e+07	5.31748e+08	5.54228e+07	8.34608e+08	4.43796	5.41214	15.0589	22.6575	15.05	7	8	44.3269	30.55	13	15	18.3787	13.26	6	6	23.0015	15.65	7	8	15.3188	8.49	4	5	20.7665	15.5	7	7	671	74.8084	5.0083
Q8Y8E9	Lmo0955 protein OS=Listeria monocytogenes GN=lmo0955 - [Q8Y8E9_LISMO]	0	133121660	0	1.07393e+08	0	9.30819e+07	>	>	>					6.01831	9.61	2	2					8.45587	15.66	3	3					7.02348	11.74	2	2	281	33.6568	5.2876
Q8Y4F3	Lmo2491 protein OS=Listeria monocytogenes GN=lmo2491 - [Q8Y4F3_LISMO]	3.94211e+08	6.2828e+08	2.15523e+08	463288023	0	2.18716e+08	1.59376	2.1496	>	8.58926	15.81	2	2	15.4899	32.09	4	4	6.58872	13.49	2	2	11.1824	14.88	2	3					13.4098	21.86	3	4	215	24.9045	4.85596
Q8Y6E8	Lmo1739 protein OS=Listeria monocytogenes GN=lmo1739 - [Q8Y6E8_LISMO]	0	1.0084e+08	0	0	0	0	>							6.05848	18.14	2	2																	215	23.5857	6.15088
Q8YAN9	Lmo0078 protein OS=Listeria monocytogenes GN=lmo0078 - [Q8YAN9_LISMO]	1.0982e+09	8.3663e+08	2.78985e+08	3.39807e+08	1.97357e+08	3.7298e+08	0.761821	1.21801	1.88987	23.4875	30.5	6	6	26.3469	38.99	8	8	25.807	25.79	5	7	14.932	20.75	4	4	23.3275	25.79	5	6	21.255	30.5	6	6	318	33.8299	5.56689
Q8Y478	Lmo2577 protein OS=Listeria monocytogenes GN=lmo2577 - [Q8Y478_LISMO]	0	2.09645e+08	6.15577e+07	0	3.34695e+07	1.30854e+08	>		3.90965					8.78766	19.27	3	3	7.47966	13.45	2	2					13.6545	16.73	3	4	6.26639	13.09	2	2	275	30.2799	4.80518
Q8Y5X8	Histidinol-phosphate aminotransferase OS=Listeria monocytogenes GN=hisC - [HIS8_LISMO]	3.46274e+08	4.52093e+08	1.30342e+08	1.0067e+08	0	1.57852e+08	1.30559	0.772352	>	9.2727	13.33	3	3	9.54967	17.5	3	3	5.55637	10.56	2	2	8.71897	10.56	2	3					9.37328	10.56	2	3	360	40.0871	5.31299
Q8YAV7	DNA gyrase subunit B OS=Listeria monocytogenes GN=gyrB - [Q8YAV7_LISMO]	3.71411e+09	1.86643e+09	4.40811e+08	3.11695e+08	5.33561e+08	9.35558e+08	0.502524	0.707094	1.75342	50.9671	28.17	10	15	60.1848	37.62	16	20	45.0029	26.63	9	14	30.4646	15.79	6	9	36.3519	18.11	7	12	26.1588	20.59	7	8	646	72.7688	5.50342
Q8Y7E4	Lmo1339 protein OS=Listeria monocytogenes GN=lmo1339 - [Q8Y7E4_LISMO]	5.87713e+08	1.58082e+09	3.31452e+08	5.10203e+08	9.62701e+07	7.55321e+08	2.68979	1.5393	7.84586	9.05861	13.35	3	3	24.2439	33.54	7	8	20.6616	24.84	5	7	15.65	24.84	5	5	21.5551	24.84	5	7	18.9136	25.78	6	7	322	33.6913	4.83057
Q8Y4H9	Lmo2462 protein OS=Listeria monocytogenes GN=lmo2462 - [Q8Y4H9_LISMO]	3.12835e+08	3.7455e+08	8.50717e+07	1.7491e+08	6.18959e+07	2.68893e+08	1.19728	2.05602	4.34427	18.4742	32.14	6	6	23.1532	37.34	7	8	6.30107	10.71	2	2	10.0182	18.83	4	4	5.46901	6.82	2	2	17.0213	23.7	5	6	308	34.7367	5.87158
Q8Y4P6	Lmo2389 protein OS=Listeria monocytogenes GN=lmo2389 - [Q8Y4P6_LISMO]	1.98323e+09	1.52092e+09	5.45426e+08	3.62058e+08	9.05302e+07	4.91697e+08	0.766892	0.663808	5.4313	43.4465	25.56	11	14	44.8433	26.55	10	13	83.189	32.75	12	27	46.45	31.02	11	15	32.6459	25.81	8	10	44.3618	20.6	8	14	403	44.0292	6.16357
Q8Y4A5	ThrC protein OS=Listeria monocytogenes GN=thrC - [Q8Y4A5_LISMO]	3.73256e+08	4.35366e+08	2.41019e+08	213289623	7.98534e+07	1.9091e+08	1.1664	0.884951	2.39076	34.5305	32.48	5	9	37.6459	33.33	5	9	27.226	18.23	4	7	21.4287	18.23	4	6	32.2188	26.78	5	8	20.2146	18.23	4	5	351	36.9399	5.43994
Q8Y5Y2	UPF0302 protein lmo1921 OS=Listeria monocytogenes GN=lmo1921 - [Y1921_LISMO]	1.19929e+08	1.93796e+08	2.91709e+08	4.66615e+07	0	6.84353e+07	1.61593	0.159959	>	5.42037	7.18	2	2	10.0996	26.52	3	3	4.9862	7.18	2	2	10.0888	17.68	3	3					14.7242	28.18	3	4	181	21.1975	5.05908
Q8Y435	Lmo2638 protein OS=Listeria monocytogenes GN=lmo2638 - [Q8Y435_LISMO]	2.58232e+10	1.25706e+10	4.20204e+09	2.95596e+09	2.74825e+09	3.85846e+09	0.486795	0.703458	1.40397	679.338	36.15	19	153	396.885	36.94	17	95	846.146	34.87	17	198	176.562	29.62	14	46	730.278	33.28	17	173	273.665	28.82	13	68	628	70.4019	7.03467
Q8Y7G2	Prolyl-tRNA synthetase OS=Listeria monocytogenes GN=proS - [SYP_LISMO]	7.99283e+08	1.58266e+09	4.34009e+08	9.02368e+08	9.8852e+07	7.89136e+08	1.9801	2.07915	7.983	41.7363	19.54	8	12	63.1801	32.92	11	18	35.4824	20.42	7	11	60.2479	23.42	9	18	26.6748	18.49	7	9	50.8525	19.37	7	14	568	63.3133	4.90674
Q8Y9B9	Lmo0613 protein OS=Listeria monocytogenes GN=lmo0613 - [Q8Y9B9_LISMO]	0	1.67019e+09	0	4.73417e+08	0	4.22267e+08	>	>	>					25.9155	28.75	6	8					25.6515	37.7	8	9					18.4216	23	5	6	313	33.9187	5.2749
Q92D14	Lmo1008 protein OS=Listeria monocytogenes GN=lmo1008 - [Q92D14_LISMO]	4.8084e+08	1421418596	6.30822e+07	2.53843e+08	6.12262e+07	1.87768e+08	2.95611	4.02401	3.0668	13.0256	37.66	3	4	14.5332	24.68	2	4	8.72088	24.68	2	3	16.622	24.68	2	5	6.1409	24.68	2	2	9.80046	24.68	2	3	77	8.95021	4.31006
Q8Y5M4	FtsA protein OS=Listeria monocytogenes GN=ftsA - [Q8Y5M4_LISMO]	7.89319e+08	9.75393e+08	3.07642e+08	4.75786e+08	1.39334e+08	3.86323e+08	1.23574	1.54656	2.77265	26.2683	28.87	5	8	25.7506	30.75	6	8	18.0043	19.25	3	5	15.8475	15.96	3	4	13.4543	15.96	3	4	13.95	22.77	4	4	426	45.9015	4.7417
Q8Y7C7	Acetyl-CoA carboxylase subunit (Biotin carboxylase subunit) OS=Listeria monocytogenes GN=lmo1357 - [Q8Y7C7_LISMO]	3.3274e+09	2.82443e+09	1.48296e+09	1.04601e+09	4.00928e+08	1.14089e+09	0.84884	0.705354	2.84563	35.4843	34.58	11	11	27.6597	27.09	7	8	22.7701	25.77	7	7	25.9817	24.45	7	8	19.044	20.26	6	6	22.0929	26.21	7	7	454	49.8974	5.47803
Q8Y729	5'-methylthioadenosine/S-adenosylhomocysteine nucleosidase OS=Listeria monocytogenes GN=mtnN - [MTNN_LISMO]	6.00372e+08	4.769e+08	0	3.70176e+08	0	5.59194e+08	0.794341	>	>	8.78062	11.59	2	3	15.4249	20.17	3	5					5.73599	13.3	2	2					5.19871	11.59	2	2	233	25.365	4.58936
Q8Y7D4	Probable glycine dehydrogenase [decarboxylating] subunit 1 OS=Listeria monocytogenes GN=gcvPA - [GCSPA_LISMO]	2.32573e+08	3.65303e+08	1.13476e+08	1.0206e+08	5.70081e+07	1.14749e+08	1.5707	0.899397	2.01285	11.2683	11.16	4	4	26.0327	20.09	7	9	16.9766	12.28	4	5	8.66515	8.93	3	3	13.364	12.28	4	4	15.4073	14.73	5	5	448	49.4473	5.73193
Q8Y8G9	Putative tRNA (cytidine/uridine-2'-O-)-methyltransferase lmo0935 OS=Listeria monocytogenes GN=lmo0935 - [Q8Y8G9_LISMO]	6.01722e+08	5.36268e+08	1.00154e+08	9.6467e+07	8.13805e+07	1.86569e+08	0.891222	0.963183	2.29256	13.1359	20.71	4	4	14.7261	26.04	4	4	9.55448	15.98	3	3	9.79232	15.98	3	3	9.78227	15.98	3	3	9.55747	15.98	3	3	169	19.5935	4.91943
Q8Y626	Thymidylate synthase OS=Listeria monocytogenes GN=thyA - [TYSY_LISMO]	7.51932e+08	7.80031e+08	2.22136e+08	2.99774e+08	1.29196e+08	3.68292e+08	1.03737	1.3495	2.85065	24.531	22.29	4	7	24.0251	22.29	4	6	18.6971	22.29	4	5	21.8238	22.29	4	6	23.5367	22.29	4	6	22.4477	22.29	4	7	314	36.1402	5.35107
Q8Y641	Peptide methionine sulfoxide reductase MsrB OS=Listeria monocytogenes GN=msrB - [MSRB_LISMO]	2.86079e+08	6.09968e+08	0	2.82848e+08	0	3.68631e+08	2.13217	>	>	7.35368	24.14	2	2	10.5141	24.14	2	3					19.967	37.24	3	5					16.2083	24.14	2	5	145	16.5111	5.0083
Q8Y4T0	Lmo2352 protein OS=Listeria monocytogenes GN=lmo2352 - [Q8Y4T0_LISMO]	0	1.45827e+09	0	4.90333e+08	0	6.6153e+08	>	>	>					24.9666	29.43	7	8					22.0702	24.41	6	7					16.9111	24.41	4	5	299	34.0776	5.87158
Q8Y7D3	Probable glycine dehydrogenase [decarboxylating] subunit 2 OS=Listeria monocytogenes GN=gcvPB - [GCSPB_LISMO]	8.78789e+08	8.76053e+08	3.76493e+08	2.9146e+08	1.63035e+08	3.36118e+08	0.996887	0.774143	2.06163	38.412	31.15	10	12	35.526	28.28	9	11	25.2395	24.39	6	8	24.8269	23.36	7	8	26.8747	30.33	8	9	26.7878	23.77	7	8	488	54.1635	5.63037
Q8Y6V8	Acetyl-coenzyme A carboxylase carboxyl transferase subunit beta OS=Listeria monocytogenes GN=accD - [ACCD_LISMO]	2.44714e+08	3.5975e+08	8.4703e+07	0	0	1.14813e+08	1.47008		>	11.9678	19.73	3	4	17.8283	31.97	5	6	5.33591	12.93	2	2									7.98166	19.73	3	3	294	31.9971	6.44287
Q8Y5Z6	Dihydrodipicolinate reductase OS=Listeria monocytogenes GN=dapB - [DAPB_LISMO]	6.83397e+08	1.3362e+09	1.51311e+08	1.63126e+08	1.3366e+08	3.58887e+08	1.95524	1.07809	2.68508	7.81991	12.17	2	2	22.606	31.56	5	7	13.6337	12.17	2	3	19.644	25.1	4	6	17.0525	12.17	2	4	20.5059	25.1	4	6	263	28.8819	5.30029
Q8Y5Q0	AlsS protein OS=Listeria monocytogenes GN=alsS - [Q8Y5Q0_LISMO]	1.15289e+09	1.15342e+09	2.39308e+08	2.65685e+08	1.49341e+08	4.79393e+08	1.00046	1.11023	3.21006	48.3528	26.73	8	14	38.1226	30.09	9	12	47.705	24.07	7	15	38.3117	22.48	6	11	35.8537	23.54	6	11	40.9184	24.07	7	11	565	61.6733	5.61768
Q8Y4R7	Glucose-6-phosphate isomerase OS=Listeria monocytogenes GN=pgi - [G6PI_LISMO]	545563904	3.7586e+08	0	7.26392e+07	0	2.56423e+08	0.688939	>	>	4.78949	7.11	2	2	9.46885	13.33	3	3					5.86646	6.89	2	2					7.69022	7.11	2	3	450	49.8655	5.42725
Q8Y651	Manganese transport system ATP-binding protein MntB OS=Listeria monocytogenes GN=mntB - [MNTB_LISMO]	0	5.88914e+08	0	1.32546e+08	0	2.32304e+08	>	>	>					27.4276	25	6	8					12.835	19.17	4	4					22.1046	21.25	5	7	240	26.4783	9.12939
Q8Y621	Lmo1881 protein OS=Listeria monocytogenes GN=lmo1881 - [Q8Y621_LISMO]	1.02144e+08	1.6427e+08	7.90035e+07	7.71552e+07	3.30126e+07	7.72419e+07	1.60821	0.976606	2.33977	8.27491	11.72	2	2	16.5946	16.9	3	4	8.446	11.72	2	2	8.06972	11.72	2	2	9.37095	11.72	2	3	8.972	11.72	2	2	290	32.4003	4.93213
Q8Y7J4	Lmo1283 protein OS=Listeria monocytogenes GN=lmo1283 - [Q8Y7J4_LISMO]	4.43258e+08	7.29184e+08	1.82324e+08	1.8463e+08	1.02921e+08	2.37736e+08	1.64506	1.01265	2.30989	12.9328	13.45	4	4	14.9042	21.03	5	5	12.8672	17.59	4	4	19.3815	21.72	5	7	8.58067	8.62	2	3	18.955	22.07	5	6	290	33.0516	4.85596
Q8Y557	Foldase protein prsA 2 OS=Listeria monocytogenes GN=prsA2 - [PRSA2_LISMO]	0	3.57417e+08	0	2.17606e+08	0	2.32951e+08	>	>	>					19.6916	29.01	5	5					11.3217	17.06	3	3					19.6536	26.62	5	5	293	32.6774	5.93506
Q8Y765	Aspartokinase OS=Listeria monocytogenes GN=lmo1436 - [Q8Y765_LISMO]	7.68578e+08	1.46237e+09	9.44081e+07	3.75944e+08	2.69221e+08	5.72364e+08	1.90269	3.98212	2.126	16.8474	19.11	4	5	32.4947	31.51	8	10	14.6147	13.15	3	4	30.031	23.08	6	9	13.8746	13.15	3	4	23.5332	28.29	6	7	403	43.0546	6.30322
Q8Y4H1	NADPH dehydrogenase OS=Listeria monocytogenes GN=namA - [NAMA_LISMO]	1.11244e+09	8.04301e+08	0	0	0	0	0.723008			6.42455	8.28	2	2	10.4426	21.6	4	4																	338	36.9824	6.87354
Q8Y493	Arginyl-tRNA synthetase OS=Listeria monocytogenes GN=argS - [SYR_LISMO]	9.91861e+08	7.22476e+08	3.28594e+08	1.26709e+08	1.80699e+08	3.60852e+08	0.728404	0.38561	1.99698	33.8299	22.3	9	10	36.5462	33.09	11	11	55.4676	25.54	9	14	17.9786	10.97	4	5	44.2932	19.96	8	12	25.7842	16.19	6	7	556	62.797	5.19873
Q8Y5Y0	3-phosphoshikimate 1-carboxyvinyltransferase OS=Listeria monocytogenes GN=aroA - [AROA_LISMO]	1.0214e+09	8.24861e+08	1.43708e+08	1.59958e+08	125291408	3.11099e+08	0.807579	1.11307	2.48301	35.0441	26.4	8	10	29.25	27.8	8	9	16.9019	17.52	5	5	24.6859	23.13	6	7	25.6041	26.64	7	7	34.6053	25.93	7	10	428	46.0481	6.18896
P33380	L-lactate dehydrogenase 1 OS=Listeria monocytogenes GN=ldh1 - [LDH1_LISMO]	1082300902	1.83645e+09	2.19561e+08	2.31025e+08	9.14052e+07	3.01906e+08	1.6968	1.05221	3.30294	33.2729	32.91	11	11	40.0338	32.59	10	12	24.2123	20.13	8	8	32.4023	16.93	7	10	32.1535	22.68	8	10	18.5593	19.49	6	6	313	34.1703	5.42725
Q926X1	Lmo2779 protein OS=Listeria monocytogenes GN=lmo2779 - [Q926X1_LISMO]	941842464	1.12111e+09	2.65654e+08	3.58377e+08	1.62532e+08	5.75311e+08	1.19034	1.34904	3.53969	17.7812	17.21	5	6	35.14	33.33	8	10	19.3083	16.67	5	6	18.2113	24.59	6	6	10.1541	8.2	3	3	19.9377	19.67	6	7	366	40.658	4.89404
Q8YAR8	Single-stranded DNA-binding protein 1 OS=Listeria monocytogenes GN=ssb1 - [SSB1_LISMO]	8.18807e+08	281789430	0	0	0	2.61966e+08	0.344146		>	7.87042	19.1	2	3	5.29681	13.48	2	2													7.578	25.28	3	3	178	19.4813	5.13525
Q8Y8P1	D-alanine--D-alanine ligase OS=Listeria monocytogenes GN=ddl - [DDL_LISMO]	4.63732e+08	1.22164e+09	3.4381e+08	3.60391e+08	1.05985e+08	3.15024e+08	2.63437	1.04823	2.97234	30.3988	27.57	7	9	20.5568	29.73	7	7	31.4709	29.73	7	11	23.6687	29.73	6	7	36.3563	27.57	6	11	33.9583	27.57	6	9	370	40.6438	4.56396
P13128	Listeriolysin O OS=Listeria monocytogenes GN=hly - [TACY_LISMO]	0	3.12332e+08	0	7.07703e+07	0	0	>	>						33.6239	24.39	8	11					13.0875	11.53	3	4									529	58.652	7.91357
Q8Y6V9	Acetyl-coenzyme A carboxylase carboxyl transferase subunit alpha OS=Listeria monocytogenes GN=accA - [ACCA_LISMO]	4.70404e+08	1.01742e+09	1.90774e+08	2.63532e+08	1.06161e+08	1.95234e+08	2.16287	1.38138	1.83903	17.5959	19.5	4	5	28.4966	23.9	6	9	16.4879	21.38	4	5	14.207	21.38	4	4	15.179	20.75	4	5	22.889	24.53	5	7	318	35.2472	5.90967
P0A2X5	Adenine phosphoribosyltransferase OS=Listeria monocytogenes GN=apt - [APT_LISMO]	2.25371e+08	2.81863e+08	1.10712e+08	141528045	5.82207e+07	1.51427e+08	1.25066	1.27835	2.60091	13.9483	19.08	3	4	17.8715	35.84	5	6	6.21037	8.67	2	2	14.3383	19.08	3	5	6.66765	18.5	2	2	9.11906	19.08	3	3	173	19.1702	5.2876
Q8Y9H0	Lmo0558 protein OS=Listeria monocytogenes GN=lmo0558 - [Q8Y9H0_LISMO]	4.06718e+09	4.74738e+09	9.24196e+08	1.09447e+09	5.19838e+08	2.49783e+09	1.16724	1.18424	4.80501	49.7225	30.35	9	18	34.9989	24.57	8	12	39.7899	30.06	8	14	52.5222	27.17	8	18	33.5764	27.46	7	12	47.4206	27.17	8	16	346	37.3618	5.5542
Q8Y4M3	Lmo2414 protein OS=Listeria monocytogenes GN=lmo2414 - [Q8Y4M3_LISMO]	475325890	865194483	1.65734e+08	2.98717e+08	8.63615e+07	3.76888e+08	1.82021	1.80239	4.36408	20.9995	21.25	5	6	47.1621	28.64	8	12	21.327	23.33	6	7	32.0499	20.55	6	9	16.3359	20.79	5	5	18.1614	18.01	5	6	433	48.0718	5.93506
Q8YAB1	Cysteinyl-tRNA synthetase OS=Listeria monocytogenes GN=cysS - [SYC_LISMO]	2.95906e+08	7.49409e+08	8.61179e+07	3.54316e+08	3.52042e+07	2.8993e+08	2.53259	4.11431	8.23564	16.7498	12.74	4	4	44.1259	35.67	9	13	12.9884	12.74	3	4	27.9692	18.05	5	8	17.423	12.74	3	5	29.2128	28.45	7	9	471	54.3202	5.07178
Q8Y5E6	Phosphoglucosamine mutase OS=Listeria monocytogenes GN=glmM - [GLMM_LISMO]	4.25666e+08	7.73448e+08	1.34826e+08	7.65106e+07	0	2.14938e+08	1.81703	0.567476	>	38.5418	23.33	4	8	40.9127	28.22	6	10	32.4811	20.44	3	7	34.2093	22.22	4	8					39.0798	23.33	4	9	450	48.4573	4.81787
Q8Y862	Dihydrolipoyl dehydrogenase OS=Listeria monocytogenes GN=PdhD - [Q8Y862_LISMO]	7.98287e+08	9.34587e+08	3.02446e+08	3.47021e+08	1.48872e+08	3.40797e+08	1.17074	1.14738	2.28919	59.1438	34.05	11	16	28.3781	26.98	7	9	32.1866	24.63	7	10	22.9618	29.12	7	7	32.7343	22.48	6	9	31.4045	27.19	8	9	467	49.4569	5.33838
Q8Y834	Lmo1084 protein OS=Listeria monocytogenes GN=lmo1084 - [Q8Y834_LISMO]	0	5.73901e+08	0	266046159	7.12933e+07	0	>	>						19.892	27.54	6	6					5.64111	7.97	2	2	4.9323	9.78	2	2					276	31.1509	5.16064
Q8Y6J9	Glutamate-1-semialdehyde 2,1-aminomutase 2 OS=Listeria monocytogenes GN=hemL2 - [GSA2_LISMO]	6.66219e+08	3.10935e+08	2.3144e+08	2.41742e+08	3.36338e+07	4.0603e+08	0.466716	1.04451	12.0721	17.6375	21.76	6	6	17.4187	17.59	5	6	5.82662	7.18	2	2	7.72698	11.81	3	3	6.57551	6.02	2	2	7.01042	14.58	3	3	432	46.0723	5.22412
Q8Y734	Lmo1489 protein OS=Listeria monocytogenes GN=lmo1489 - [Q8Y734_LISMO]	0	2.44613e+08	5.7394e+07	0	4.06897e+07	1.47073e+08	>		3.6145					7.47192	35.42	3	3	5.38334	23.96	2	2					4.99007	23.96	2	2	5.35112	23.96	2	2	96	10.785	9.75928
Q8Y4G9	UPF0042 nucleotide-binding protein lmo2474 OS=Listeria monocytogenes GN=lmo2474 - [Y2474_LISMO]	9.27952e+08	1.01379e+09	2.12356e+08	1.5554e+08	9.64415e+07	3.44696e+08	1.0925	0.732452	3.57414	11.2203	17.18	4	4	18.0532	30.93	7	7	7.81551	7.22	2	3	12.5397	17.18	4	5	12.8116	14.78	4	5	15.122	17.18	4	5	291	33.5313	6.20166
Q8YAB3	Glutamyl-tRNA synthetase OS=Listeria monocytogenes GN=gltX - [SYE_LISMO]	1.85824e+09	2.74432e+09	5.86511e+08	5.3804e+08	3.70796e+08	1.17909e+09	1.47684	0.917356	3.17989	27.5369	25.05	7	7	50.9793	33.2	11	15	54.0349	30.96	10	15	52.8796	28.92	9	15	56.6613	28.92	9	16	55.1291	33.4	11	16	491	56.0005	5.22412
Q48793	Ribose-phosphate pyrophosphokinase 1 OS=Listeria monocytogenes GN=prs1 - [KPRS1_LISMO]	9.72522e+08	6.5415e+08	5.0842e+07	5.27169e+07	1.66732e+08	5.47532e+08	0.672633	1.03688	3.28391	12.3312	14.15	4	4	11.6204	17.3	3	3	6.97707	9.12	2	2	7.53708	9.12	2	2	6.25629	8.18	2	2	11.3921	15.72	4	4	318	35.0473	6.18896
P0A491	50S ribosomal protein L35 OS=Listeria monocytogenes GN=rpmI - [RL35_LISMO]	2.90742e+09	0	0	0	0	0				4.82059	34.85	2	2																					66	7.71526	12.5571
Q48746	Lmo1453 protein OS=Listeria monocytogenes GN=lmo1453 - [Q48746_LISMO]	1.67269e+08	1.23042e+08	0	0	0	0	0.735596			23.6048	34.62	4	7	4.7089	11.11	2	2																	234	26.1838	7.44482
Q8Y7F1	Polyribonucleotide nucleotidyltransferase OS=Listeria monocytogenes GN=pnp - [PNP_LISMO]	9.65976e+08	1.30893e+09	4.28375e+08	4.32543e+08	1.09507e+08	4.46443e+08	1.35503	1.00973	4.07683	28.9638	15.63	8	9	45.0061	22.54	12	14	36.2492	17.15	8	11	33.1968	12.17	6	10	25.7929	10.93	5	7	28.2242	14.38	7	8	723	79.5524	5.32568
Q8Y4I0	Lmo2460 protein OS=Listeria monocytogenes GN=lmo2460 - [Q8Y4I0_LISMO]	0	1.07432e+08	0	0	0	0	>							10.6466	18.1	3	3																	348	38.3131	7.95752
Q8Y7I0	Glutamine synthetase OS=Listeria monocytogenes GN=glnA - [Q8Y7I0_LISMO]	3593247830	1.37829e+09	6.69002e+08	3.87945e+08	4.34578e+08	7.59765e+08	0.383577	0.579885	1.74828	51.3369	25.45	9	16	34.0653	24.77	8	11	53.5936	25.45	10	17	26.9861	24.77	7	9	32.8927	22.3	7	10	27.6615	24.77	7	9	444	50.4293	5.08447
Q926W7	Partition protein, ParA homolog OS=Listeria monocytogenes GN=parA - [Q926W7_LISMO]	1.32557e+08	3.04634e+08	0	0	0	1.12532e+08	2.29814		>	16.9514	13.04	2	5	31.4175	26.48	5	10													18.214	23.32	3	6	253	27.4537	5.22412
Q9RLT9	DNA-directed RNA polymerase subunit beta OS=Listeria monocytogenes GN=rpoB - [RPOB_LISMO]	3.57687e+09	2.89464e+09	9.92078e+08	5.38839e+08	5.13562e+08	9.08402e+08	0.809267	0.543142	1.76882	92.6449	26.35	21	29	118.425	29.48	23	36	70.4809	25.25	16	23	41.9764	16.55	10	14	63.5433	21.79	15	19	45.0179	17.06	12	15	1184	132.521	5.17334
Q8YAD3	50S ribosomal protein L25 OS=Listeria monocytogenes GN=rplY - [RL25_LISMO]	0	1.28597e+08	0	1.26201e+08	0	1.10112e+08	>	>	>					15.2674	22.71	2	5					8.74125	13.53	2	3					13.7306	29.95	3	5	207	22.6406	4.50049
Q8Y7B3	Lmo1373 protein OS=Listeria monocytogenes GN=lmo1373 - [Q8Y7B3_LISMO]	3.61042e+08	1.16211e+09	1.35699e+08	1.54643e+08	1.68654e+08	1.38108e+08	3.21875	1.1396	0.818885	11.0513	13.15	3	4	13.5036	17.13	5	5	14.5279	17.13	4	5	10.9398	15.9	4	4	21.1821	25.08	6	7	9.48679	13.15	3	3	327	35.7143	4.93213
Q8Y7N7	Glutamate racemase OS=Listeria monocytogenes GN=murI - [MURI_LISMO]	3.16101e+08	4.23191e+08	1.72231e+08	2.17832e+08	7.40278e+07	1.63208e+08	1.33878	1.26477	2.20469	9.49223	19.55	3	3	18.6584	30.08	5	6	8.91198	19.55	3	3	9.29564	19.55	3	3	8.31606	19.55	3	3	12.5618	24.81	4	4	266	29.1412	6.15088
Q8Y789	DNA mismatch repair protein mutS OS=Listeria monocytogenes GN=mutS - [MUTS_LISMO]	1.14447e+09	7.84476e+08	2.26209e+08	2.02635e+08	1.52311e+08	4.18315e+08	0.68545	0.895787	2.74645	45.4114	15.58	8	14	70.2678	22.79	12	21	32.5505	17.21	9	11	37.0761	14.3	8	11	35.9204	17.44	9	11	42.5788	14.65	8	12	860	98.1422	5.41455
Q9RE04	P45 OS=Listeria monocytogenes GN=spl - [Q9RE04_LISMO]	0	9.90419e+08	0	1.20737e+08	0	1.90645e+08	>	>	>					64.5433	28.93	9	15					48.9604	22.19	7	12					49.5524	25.44	6	13	401	42.6857	8.54346
Q8Y730	Lmo1493 protein OS=Listeria monocytogenes GN=lmo1493 - [Q8Y730_LISMO]	3.65139e+09	2.46564e+09	6.70732e+08	4.24699e+08	7.03919e+08	1.28764e+09	0.67526	0.633188	1.82924	73.2339	33.06	13	21	46.653	30.23	11	13	58.9017	27.41	11	15	63.7271	29.07	11	17	50.2827	29.07	11	14	44.0943	23.42	9	13	602	68.7511	4.89404
Q8Y840	Lmo1078 protein OS=Listeria monocytogenes GN=lmo1078 - [Q8Y840_LISMO]	4.36342e+08	6.91452e+08	117227694	1.41767e+08	3.70832e+07	1.83116e+08	1.58465	1.20933	4.93798	11.5817	17.24	3	3	13.6695	20.34	4	4	11.1801	17.24	3	3	6.90912	10.34	2	2	8.78165	13.79	2	2	17.406	20.34	4	5	290	32.4531	5.14795
Q8Y6Q0	Lmo1634 protein OS=Listeria monocytogenes GN=lmo1634 - [Q8Y6Q0_LISMO]	1.22259e+09	5.03472e+08	3.89791e+08	2.47811e+08	2.48604e+08	2.92808e+08	0.411808	0.635752	1.17781	49.5472	21.48	10	14	50.8735	25.87	13	16	63.8729	22.17	11	18	13.7605	9.7	4	4	58.7742	21.25	10	17	45.6208	19.4	9	13	866	94.6219	6.93213
Q8Y6Z4	Lmo1536 protein OS=Listeria monocytogenes GN=lmo1536 - [Q8Y6Z4_LISMO]	1.75627e+08	230046710	0	0	0	1.31938e+08	1.30986		>	6.67846	11.7	2	2	14.6311	24.82	4	4													8.28	17.02	2	2	282	31.0652	6.06201
Q9S5A6	Heat-inducible transcription repressor hrcA OS=Listeria monocytogenes GN=hrcA - [HRCA_LISMO]	0	3.48322e+08	0	0	0	0	>							7.04555	11.01	3	3																	345	39.6561	5.57959
Q9LAT7	Lmo2196 protein OS=Listeria monocytogenes GN=oppA - [Q9LAT7_LISMO]	172056852	4.45632e+08	9.25034e+07	1.25219e+08	0	1.57668e+08	2.59003	1.35367	>	6.38026	4.48	2	2	13.7399	12.01	4	4	10.8308	10.93	4	4	10.5834	9.86	3	3					14.1489	13.26	4	4	558	62.5486	5.49072
Q8Y700	Queuine tRNA-ribosyltransferase OS=Listeria monocytogenes GN=tgt - [TGT_LISMO]	515751514	4.61671e+08	1.13254e+08	6.08973e+07	1.49487e+08	2.22825e+08	0.895142	0.537704	1.4906	21.4434	27.97	5	6	20.0336	18.21	3	5	15.3823	18.73	3	4	13.671	18.73	3	3	9.48421	13.46	2	3	15.0755	19	3	4	379	42.8935	7.54736
Q8Y860	Lmo1057 protein OS=Listeria monocytogenes GN=lmo1057 - [Q8Y860_LISMO]	5.60901e+08	6.0154e+08	0	9.31634e+07	0	259064567	1.07245	>	>	28.8864	23.34	5	9	39.8547	33.12	7	12					22.2182	19.56	3	7					28.8201	24.92	5	9	317	35.2417	5.60498
P60384	Redox-sensing transcriptional repressor rex OS=Listeria monocytogenes GN=rex - [REX_LISMO]	0	5.70338e+08	1.7801e+07	2.23416e+08	0	2.62409e+08	>	12.5508	>					9.23072	21.4	3	3	5.49931	10.7	2	2	12.8397	27.91	4	4					12.3935	28.37	4	4	215	24.1846	6.12549
Q9AGE7	10 kDa chaperonin OS=Listeria monocytogenes GN=groS - [CH10_LISMO]	0	6.27148e+08	0	0	0	0	>							5.52216	32.98	2	2																	94	10.0583	4.67822
Q8Y736	Lmo1487 protein OS=Listeria monocytogenes GN=lmo1487 - [Q8Y736_LISMO]	0	3.68952e+08	0	8.78299e+07	0	1.49747e+08	>	>	>					17.0781	23.04	4	6					13.4964	16.23	2	4					15.6036	26.18	3	5	191	21.9472	5.92236
Q8Y8J5	Lmo0906 protein OS=Listeria monocytogenes GN=lmo0906 - [Q8Y8J5_LISMO]	6.97698e+08	4.79153e+08	2.68545e+08	0	1.433e+08	0	0.686763			21.7618	23.39	5	7	8.01454	11.8	3	3	19.8828	21.38	4	6					21.124	18.04	4	6					449	48.964	5.99854
Q8YAC6	ATP-dependent zinc metalloprotease FtsH 1 OS=Listeria monocytogenes GN=ftsH - [Q8YAC6_LISMO]	4.70207e+08	3.4683e+08	7.75805e+07	0	4.73507e+07	2.41592e+08	0.737611		5.10219	16.777	12.45	5	5	25.8496	14.47	6	7	11.8612	8.68	4	4					5.62571	4.34	2	2	20.6778	14.33	5	6	691	76.1909	5.10986
Q927L7	50S ribosomal protein L14 OS=Listeria monocytogenes GN=rplN - [RL14_LISMO]	1.87185e+09	1.91803e+09	1.88908e+08	4.86586e+08	3.17914e+08	1.09416e+09	1.02467	2.57578	3.44169	10.5384	30.33	3	4	12.3993	32.79	4	5	8.28041	19.67	2	3	7.61809	19.67	2	3	8.55774	19.67	2	3	12.6424	22.13	3	5	122	13.2181	9.99365
Q8Y6H5	Methionine aminopeptidase OS=Listeria monocytogenes GN=lmo1709 - [Q8Y6H5_LISMO]	0	1.54518e+09	0	0	0	292377898	>		>					5.8987	12.3	2	2													7.85047	18.25	2	2	252	27.865	5.61768
Q8Y6W6	DNA polymerase I OS=Listeria monocytogenes GN=polA - [Q8Y6W6_LISMO]	6.06819e+08	5.82926e+08	1.77342e+08	1.83102e+08	8.0681e+07	2.17966e+08	0.960626	1.03248	2.70157	46.7324	22.17	11	14	43.6201	22.63	13	14	21.5633	14.06	7	7	21.3943	14.74	7	7	16.4059	10.17	5	5	25.5997	12.34	7	9	875	98.3868	5.21143
Q8Y8K9	RsbR protein OS=Listeria monocytogenes GN=RsbR - [Q8Y8K9_LISMO]	3.61649e+08	4.44851e+08	8.13609e+07	4.8075e+07	1.12161e+08	1.00638e+08	1.23006	0.590886	0.897264	15.3438	19.06	4	5	9.06026	14.75	3	3	13.5588	14.75	3	4	10.3847	10.07	2	3	10.1794	10.07	2	3	6.79812	10.43	2	2	278	31.6004	4.93213
Q8Y9T0	Lmo0443 protein OS=Listeria monocytogenes GN=lmo0443 - [Q8Y9T0_LISMO]	0	1.88977e+08	0	0	0	6.12912e+07	>		>					23.6096	19.42	4	6													16.939	19.42	3	5	309	34.1239	9.05615
Q8Y688	Phosphate acyltransferase OS=Listeria monocytogenes GN=plsX - [PLSX_LISMO]	4.2319e+08	4.60048e+08	1.01916e+08	6.88178e+07	5.33284e+07	1.91141e+08	1.0871	0.67524	3.58423	17.2532	20.77	5	6	17.9162	19.58	5	6	8.03916	11.57	3	3	12.0042	17.21	4	4	8.29984	8.01	2	3	12.5545	17.21	4	4	337	36.384	7.41553
Q8Y606	AspB protein OS=Listeria monocytogenes GN=aspB - [Q8Y606_LISMO]	1.46105e+08	1.96978e+08	3.54517e+07	5.17486e+07	1.77194e+07	5.87435e+07	1.3482	1.45969	3.31521	21.2617	21.37	5	5	22.903	21.37	5	5	31.0093	18.07	4	7	28.0999	16.79	4	7	21.0058	16.54	3	5	25.5247	21.37	5	6	393	43.3313	5.52881
Q8Y8T3	Lmo0811 protein OS=Listeria monocytogenes GN=lmo0811 - [Q8Y8T3_LISMO]	3.50434e+08	1.43838e+09	7.55324e+07	3.45506e+08	0	5.91139e+08	4.10457	4.57427	>	14.7618	23.61	4	5	16.5297	32.19	6	6	7.61658	18.45	3	3	9.13452	19.74	3	3					12.5175	28.76	4	4	233	27.2323	4.97021
Q927L6	30S ribosomal protein S17 OS=Listeria monocytogenes GN=rpsQ - [RS17_LISMO]	0	406222651	0	0	0	0	>							4.46222	32.18	2	2																	87	10.0294	9.89111
Q8Y449	Adenylate kinase OS=Listeria monocytogenes GN=adk - [KAD_LISMO]	9.06825e+08	1.15028e+09	1.49914e+08	2.96894e+08	0	3.62306e+08	1.26847	1.98043	>	16.8791	32.09	5	6	19.6213	32.09	6	7	6.33026	16.74	2	2	14.5845	26.51	5	5					15.5633	26.98	5	6	215	24.2483	5.22412
Q8Y823	Lmo1095 protein OS=Listeria monocytogenes GN=lmo1095 - [Q8Y823_LISMO]	3.03988e+08	4.32567e+08	1.62681e+08	1.55172e+08	5.00263e+07	1.97253e+08	1.42297	0.953842	3.94299	9.97683	32.09	3	3	5.16734	22.39	2	2	9.48708	22.39	2	3	6.165	22.39	2	2	5.83087	22.39	2	2	6.67403	22.39	2	2	134	14.6225	7.92822
Q8Y714	tRNA-specific 2-thiouridylase mnmA OS=Listeria monocytogenes GN=mnmA - [MNMA_LISMO]	633148536	7.81749e+08	0	1.68929e+08	1.31008e+08	3.70168e+08	1.2347	>	2.82553	12.1778	13.75	3	4	12.1044	9.43	2	3					14.6504	9.43	2	3	14.1634	9.43	2	3	12.7983	13.75	3	4	371	41.4776	5.07178
Q8Y3W1	Lmo2720 protein OS=Listeria monocytogenes GN=lmo2720 - [Q8Y3W1_LISMO]	9.37869e+08	1.66766e+09	6.29314e+08	7.34217e+08	2.7309e+08	7.72139e+08	1.77814	1.16669	2.82742	27.8977	19.81	7	9	27.0946	18.48	8	9	22.4087	21.71	8	8	14.179	14.48	5	5	18.4688	12.38	5	7	29.9303	19.81	7	10	525	59.1201	5.79541
Q8YAC8	Polyribonucleotide nucleotidyltransferase domain present OS=Listeria monocytogenes GN=lmo0218 - [Q8YAC8_LISMO]	0	2.27039e+08	0	0	0	0	>							13.2601	21.13	2	4																	142	15.6642	9.34912
Q8Y824	Lmo1094 protein OS=Listeria monocytogenes GN=lmo1094 - [Q8Y824_LISMO]	1242813061	0	0	0	0	0				5.96178	31.37	2	2																					102	11.4029	5.08447
Q9S5A2	Ribosomal protein L11 methyltransferase OS=Listeria monocytogenes GN=prmA - [PRMA_LISMO]	5.4269e+08	7.09553e+08	2.52381e+08	2.61626e+08	1.15545e+08	3.23251e+08	1.30748	1.03663	2.79763	22.4786	26.11	7	7	26.9337	31.21	8	9	26.6188	25.8	6	9	22.3115	28.03	6	8	21.9512	31.21	7	7	21.06	31.21	7	7	314	34.79	4.52588
P65770	Probable inorganic polyphosphate/ATP-NAD kinase 2 OS=Listeria monocytogenes GN=ppnK2 - [PPNK2_LISMO]	5.32814e+08	8.02451e+08	1.29715e+08	2.00052e+08	8.56518e+07	2.8802e+08	1.50606	1.54225	3.36268	15.5055	26.22	4	5	16.0437	26.22	4	5	15.458	20.6	3	5	14.0309	20.6	3	4	16.4078	20.6	3	5	11.636	20.6	3	4	267	30.4796	7.03467
Q8YA56	Lmo0305 protein OS=Listeria monocytogenes GN=lmo0305 - [Q8YA56_LISMO]	3.38533e+08	2.75756e+08	1.57272e+08	1.22002e+08	5.76162e+07	9.29533e+07	0.814563	0.775735	1.61332	16.1154	20.67	3	4	12.8439	20.11	3	3	17.5846	20.11	3	4	11.6179	20.11	3	3	21.3711	22.63	4	6	11.8241	8.94	2	3	358	39.8733	4.97021
Q8Y6T4	Tyrosyl-tRNA synthetase OS=Listeria monocytogenes GN=tyrS - [SYY_LISMO]	1.75306e+09	1.93197e+09	6.26756e+08	4.90266e+08	1.80886e+08	8.83841e+08	1.10205	0.782228	4.88618	23.491	24.11	8	8	33.094	26.73	9	11	19.1062	20.76	7	7	26.0968	23.15	8	9	30.9514	20.53	7	11	27.0822	26.49	9	10	419	47.5642	5.23682
Q8Y693	Lmo1803 protein OS=Listeria monocytogenes GN=lmo1803 - [Q8Y693_LISMO]	2.99077e+08	4.29252e+08	76511112	1.29675e+08	0	2.11707e+08	1.43526	1.69486	>	12.003	18.6	3	4	22.1972	27.74	5	7	6.10807	9.45	2	2	10.419	18.9	3	3					9.59191	9.45	2	3	328	36.3839	4.98291
P66548	30S ribosomal protein S3 OS=Listeria monocytogenes GN=rpsC - [RS3_LISMO]	0	1.24589e+09	0	4.90107e+08	0	5.70245e+08	>	>	>					6.2193	12.84	2	2					8.08155	12.84	2	3					6.4486	12.84	2	2	218	24.527	9.74463
Q8Y7J1	DNA topoisomerase IV subunit B OS=Listeria monocytogenes GN=parE - [Q8Y7J1_LISMO]	1.83287e+08	1.26543e+08	0	1.28399e+08	0	1.55937e+08	0.690408	>	>	9.31667	8.09	3	4	9.64264	8.7	3	3					5.22421	5.65	2	2					4.94757	5.65	2	2	655	72.9695	6.41748
Q8Y4F6	UvrABC system protein A OS=Listeria monocytogenes GN=uvrA - [UVRA_LISMO]	1.11824e+09	7.08184e+08	3.16057e+08	1.21997e+08	1.9428e+08	1.7155e+08	0.6333	0.385998	0.883003	40.0286	21.65	13	15	38.4378	19.04	13	14	27.7341	13.6	8	9	14.2478	4.81	3	4	21.7034	10.88	7	7	12.1312	7.85	4	4	956	106.415	6.60986
Q8Y7I4	GlpD protein OS=Listeria monocytogenes GN=glpD - [Q8Y7I4_LISMO]	2.01943e+08	7.29632e+08	0	0	0	8.72222e+07	3.61306		>	7.9595	4.84	2	2	13.7216	8.24	4	4													11.5937	7.35	3	3	558	63.1993	6.78564
Q8Y3N3	Ribosomal RNA small subunit methyltransferase G OS=Listeria monocytogenes GN=rsmG - [RSMG_LISMO]	1.68535e+08	2.68841e+08	0	75878176	3.49878e+07	1.17221e+08	1.59517	>	3.35033	11.5937	22.69	4	4	10.5572	18.49	4	4					7.9738	9.66	2	3	8.50918	13.87	3	3	8.60864	13.87	3	3	238	27.1408	6.44287
Q8Y7B9	Arginine repressor OS=Listeria monocytogenes GN=argR - [ARGR_LISMO]	0	3.30023e+08	0	0	0	0	>							5.76912	23.49	2	2																	149	16.7676	5.56689
Q8YAA4	50S ribosomal protein L1 OS=Listeria monocytogenes GN=rplA - [RL1_LISMO]	0	3.19136e+08	0	5.95049e+07	0	1.10514e+08	>	>	>					7.92896	9.61	2	3					7.45117	15.72	3	3					8.43745	15.72	3	3	229	24.517	9.31982
Q8Y8W9	Lmo0773 protein OS=Listeria monocytogenes GN=lmo0773 - [Q8Y8W9_LISMO]	0	0	0	0	0	8.21914e+07			>																					6.75596	10.94	2	2	329	35.2071	5.12256
Q8Y838	Lmo1080 protein OS=Listeria monocytogenes GN=lmo1080 - [Q8Y838_LISMO]	666195677	3.39571e+08	2.17043e+08	2.06255e+08	1.12027e+08	2.16179e+08	0.509716	0.950295	1.92971	21.3297	12.52	5	7	21.5343	14.45	6	7	13.4818	11.08	5	5	10.6843	8.83	4	4	10.8393	7.38	4	4	23.1585	14.13	5	7	623	71.4426	5.73193
Q8Y560	Lmo2216 protein OS=Listeria monocytogenes GN=lmo2216 - [Q8Y560_LISMO]	0	1.12447e+08	0	0	0	0	>							6.3873	30	2	2																	140	16.1242	5.36377
Q8Y754	Glycyl-tRNA synthetase beta subunit OS=Listeria monocytogenes GN=glyS - [SYGB_LISMO]	9.17521e+08	5.90879e+08	4.00805e+08	2.0737e+08	1.6916e+08	3.53492e+08	0.643995	0.517383	2.08969	43.6943	22.97	10	14	32.6677	12.94	6	9	30.173	17.73	8	10	20.7356	10.47	5	6	17.7634	13.08	6	6	31.8794	12.94	6	9	688	78.4586	4.94482
Q8YAC4	33 kDa chaperonin OS=Listeria monocytogenes GN=hslO - [HSLO_LISMO]	0	4.87981e+08	0	2.57538e+07	0	1.84393e+08	>	>	>					12.1021	19.05	4	4					6.20953	14.29	2	2					19.9261	25.51	5	6	294	31.8948	4.66553
Q8Y4U6	FruA protein OS=Listeria monocytogenes GN=fruA - [Q8Y4U6_LISMO]	7.6264e+08	4.17258e+08	2.3989e+08	6.22484e+07	167730237	1.99962e+08	0.547123	0.259487	1.19217	17.6944	9.97	5	6	31.1273	22.63	8	11	22.1653	11.71	5	8	6.37217	5.38	2	2	16.0467	10.6	5	6	14.6389	8.7	4	5	632	66.1731	5.99854
Q8Y8D4	D-alanine--poly(phosphoribitol) ligase subunit 1 OS=Listeria monocytogenes GN=dltA - [DLTA_LISMO]	3.10166e+08	3.15568e+08	4.21276e+07	7.9257e+07	0	1.53088e+08	1.01742	1.88136	>	16.8296	17.84	5	5	29.1751	21.18	7	9	4.79038	4.71	2	2	10.5863	11.37	4	4					11.4483	11.37	4	4	510	57.7254	5.17334
Q8Y4F5	UvrABC system protein B OS=Listeria monocytogenes GN=uvrB - [UVRB_LISMO]	1.22321e+09	1.17632e+09	4.39952e+08	3.9241e+08	1.9634e+08	4.18981e+08	0.961666	0.891938	2.13395	39.5109	21.88	8	11	46.1836	25.68	11	14	27.3253	19.6	7	8	36.3017	21.88	8	11	21.881	13.37	7	7	32.5864	21.88	8	10	658	75.5149	5.45264
Q8Y4C0	ATP synthase subunit alpha 2 OS=Listeria monocytogenes GN=atpA2 - [ATPA2_LISMO]	4.92705e+08	4.94353e+08	1.10049e+08	1.16746e+08	9.8675e+07	9.68443e+07	1.00335	1.06085	0.981448	19.7533	19.44	5	6	31.0395	25.4	8	10	17.5694	16.87	4	5	17.6322	18.85	5	6	22.7011	18.85	5	7	9.79946	14.09	3	3	504	55.0528	5.49072
Q8Y826	Nicotinate phosphoribosyltransferase OS=Listeria monocytogenes GN=lmo1092 - [Q8Y826_LISMO]	5.30835e+08	3.37983e+08	2.03522e+08	8.48701e+07	6.36891e+07	1.88095e+08	0.636701	0.417006	2.95333	15.5933	15.32	4	4	14.8178	14.52	5	5	14.5769	15.32	4	4	9.52694	6.25	2	3	10.2587	9.07	3	3	7.75092	6.25	2	2	496	56.2306	5.35107
Q8Y7Q1	Phenylalanyl-tRNA synthetase beta chain OS=Listeria monocytogenes GN=pheT - [SYFB_LISMO]	7.06204e+08	5.63829e+08	2.10102e+08	1.40887e+08	4.30828e+08	3.18473e+08	0.798393	0.670562	0.73921	32.1352	17.33	8	9	32.7987	18.95	9	10	28.3029	11.1	5	7	20.5675	12.59	5	6	32.0597	15.71	7	10	33.5356	16.96	7	8	802	87.956	5.16064
Q8Y798	Lmo1392 protein OS=Listeria monocytogenes GN=lmo1392 - [Q8Y798_LISMO]	7.72791e+08	8.98469e+08	1.18697e+08	1.69748e+08	7.31371e+07	297970358	1.16263	1.43009	4.07413	29.8727	23.72	8	10	29.5101	18.6	6	9	11.4275	8.84	3	4	22.3299	14.65	5	7	15.3935	12.33	4	5	25.7643	17.91	6	9	430	49.0002	5.03369
Q8Y3T4	Seryl-tRNA synthetase OS=Listeria monocytogenes GN=serS - [SYS_LISMO]	1.45012e+09	1.16829e+09	326580849	2.78587e+08	6.47342e+07	4.92314e+08	0.805648	0.853043	7.60517	20.0834	18.97	6	7	16.9428	18.5	6	6	22.5037	18.97	6	8	13.7924	14.75	5	5	14.5195	16.39	5	5	21.5557	15.22	5	7	427	49.047	5.36377
Q8Y6M1	AnsB protein OS=Listeria monocytogenes GN=ansB - [Q8Y6M1_LISMO]	2.21457e+09	1.33647e+09	6.15862e+08	3.25146e+08	1.38538e+08	7.68802e+08	0.603488	0.527952	5.54941	32.5956	19	8	9	21.4813	12.56	6	6	46.8181	19	8	13	33.0782	19.32	8	10	33.8311	11.43	5	9	28.9143	19.32	8	9	621	71.8529	5.71924
Q8Y756	Probable endonuclease 4 OS=Listeria monocytogenes GN=nfo - [END4_LISMO]	3.67891e+08	3.30945e+08	7.14712e+07	7.01303e+07	3.84228e+07	1.54005e+08	0.899575	0.981239	4.00817	14.9527	17.85	4	6	21.1218	25.59	5	7	8.50386	13.13	3	3	5.59547	9.43	2	2	5.30699	9.43	2	2	21.6649	17.85	4	8	297	32.6786	6.18896
Q8Y8G8	Lmo0936 protein OS=Listeria monocytogenes GN=lmo0936 - [Q8Y8G8_LISMO]	4.92334e+08	6.28454e+08	7.13415e+07	2.0905e+08	4.63498e+07	1.65844e+08	1.27648	2.93027	3.5781	17.016	22.36	5	5	12.8862	20.33	4	4	8.81291	9.35	2	3	9.04292	14.23	3	3	9.30538	16.26	3	3	10.147	16.26	3	3	246	27.3762	6.02393
Q8Y3M5	tRNA uridine 5-carboxymethylaminomethyl modification enzyme MnmG OS=Listeria monocytogenes GN=mnmG - [MNMG_LISMO]	2.9271e+08	2.19013e+08	1.44199e+08	4.9061e+07	6.03817e+07	136890987	0.748223	0.340231	2.26709	19.9889	15.1	5	5	9.86786	8.27	3	3	10.2085	9.7	3	3	9.97094	9.22	3	3	5.60881	6.52	2	2	18.8864	13.83	5	6	629	70.0932	5.50342
Q8YA81	Lmo0278 protein OS=Listeria monocytogenes GN=lmo0278 - [Q8YA81_LISMO]	172139048	1.89749e+08	0	0	0	0	1.1023			6.94096	7.65	2	2	6.34131	7.65	2	2																	366	41.122	6.21436
Q8Y6B7	Phosphoribosylaminoimidazole carboxylase II OS=Listeria monocytogenes GN=purK - [Q8Y6B7_LISMO]	1.10008e+09	6.68378e+08	3.02827e+08	2.48658e+08	1.81871e+08	4.58127e+08	0.607573	0.821121	2.51896	14.8015	20.05	4	5	20.0481	16.04	5	6	13.7398	11.23	3	4	18.1914	11.23	3	5	10.014	6.68	2	3	12.7138	13.37	3	4	374	41.3814	5.12256
Q8Y8T1	Lmo0813 protein OS=Listeria monocytogenes GN=lmo0813 - [Q8Y8T1_LISMO]	2.48252e+08	3.01241e+08	5.47401e+07	4.30123e+07	4.26823e+07	1.27876e+08	1.21345	0.785756	2.99601	10.4846	10.34	3	3	8.12863	7.59	2	3	5.53114	7.24	2	2	5.8959	8.62	2	2	7.79283	11.03	3	3	6.29439	8.62	2	2	290	31.3511	5.90967
Q93Q55	Gamma-glutamyl phosphate reductase OS=Listeria monocytogenes GN=proA - [PROA_LISMO]	5.94403e+08	5.35682e+08	1.00778e+08	1.00159e+08	6.61129e+07	2.67008e+08	0.90121	0.993853	4.03866	20.5618	20.96	5	5	32.8038	28.92	7	9	22.112	24.82	6	6	22.7527	17.11	4	6	18.0306	20.48	5	5	35.3005	24.82	6	9	415	45.4806	5.47803
Q8YAA6	Transcription antitermination protein nusG OS=Listeria monocytogenes GN=nusG - [Q8YAA6_LISMO]	0	0	0	1.00643e+08	0	1.12695e+08		>	>													6.97264	20.9	2	2					6.40902	16.38	2	2	177	19.928	5.22412
Q8Y7F8	Lmo1323 protein OS=Listeria monocytogenes GN=lmo1323 - [Q8Y7F8_LISMO]	0	8.92242e+07	0	0	0	0	>							7.07544	28.72	2	2																	94	10.6047	9.37842
Q8Y4B3	Uracil phosphoribosyltransferase OS=Listeria monocytogenes GN=upp - [UPP_LISMO]	827611632	1.17955e+09	4.96371e+08	3.08816e+08	2.98845e+08	4.29508e+08	1.42525	0.622147	1.43723	17.4033	28.71	3	5	21.5681	19.62	3	7	5.42169	19.62	2	2	4.84833	19.62	2	2	11.3598	19.62	2	4	7.75142	19.62	3	3	209	22.9301	6.06201
Q8Y5B3	Lmo2154 protein OS=Listeria monocytogenes GN=lmo2154 - [Q8Y5B3_LISMO]	0	5.56386e+08	0	2.36643e+08	0	2.12047e+08	>	>	>					16.6252	24.93	5	5					9.18911	15.47	3	3					14.4268	16.62	3	4	349	40.1919	4.80518
Q8Y888	Lmo1029 protein OS=Listeria monocytogenes GN=lmo1029 - [Q8Y888_LISMO]	5.2639e+08	277068249	1.14883e+08	8.5626e+07	0	0	0.526355	0.745334		11.1023	16.02	2	3	17.174	28.52	3	5	4.86714	16.02	2	2	8.74613	16.02	2	2									256	28.7323	5.42725
Q8Y960	Motility gene repressor mogR OS=Listeria monocytogenes GN=mogR - [MOGR_LISMO]	2.13875e+08	3.54456e+08	0	2.12253e+08	0	1.36059e+08	1.65731	>	>	5.15448	6.54	2	2	10.2876	12.42	3	4					4.35168	6.54	2	2					8.24049	12.42	3	3	306	35.2322	5.64307
Q8Y5S7	Glucose-6-phosphate 1-dehydrogenase OS=Listeria monocytogenes GN=lmo1978 - [Q8Y5S7_LISMO]	9.27915e+08	1.22356e+09	2.3655e+08	2.58982e+08	1.14871e+08	3.02912e+08	1.31861	1.09483	2.63698	31.9254	25.87	8	9	34.0533	28.31	9	11	26.9971	23.01	7	9	23.6877	20.77	6	8	28.2819	19.14	6	9	20.6456	16.5	5	6	491	56.1642	5.43994
[truncated: 217 more rows]
